# Supplementary material
Source: publisher site journal article supplement (https://mycokeys.pensoft.net/article/4852/download/suppl/33/)
Supplement: Supplementary file 1

## Sheet: Sheet1
Table S3. Classification of the SSU fungal data set.
OTU	Ph	Cl	Representative sequence	Best match	Score	E-value	Match	start	end	G2653	G2655	G2657	G2658	G2659	G2660	G2662	G2664	G2666	G2667	G2669	G2674	G2675	G2677	G2678	G2679	G2700	G2728	G2729	G2732	G2733	G2734	G2735	G2736	G2739	G2742	G2655_ArcRM	G2658_ArcRM
S1196_0001	Basidiomycota	Fungi_other	CCCCATGTTGTCAAATTAAGCCACAGGCTCCACACCTGGTGGTGCCCTTCCATCAATTCCTTTATGTTTCAGCCTTGCAACCATACTCCCCCCAGAACCCAAAGACTCTGATTTCTCATAAGGTGCTGAGCAACACATCATAACTGAGGTTGCCTGATCCCTAGTTTGTGTTAAGACTACAATGGTATCTGATCATTTTCAATCCCCTAACCTTCATTCTTGATTAATGAAAACATCCTTGGAAAATGCTTTCACAATAGTTGGTCTTGAGTCAATCCAAGAATTTCACCTCTAGCAACTCAATACCAATGCCCCCAACTATCCCTATCAATCATTATGGCAACTCTAGAAACCAACAAAATAGAACTGCACA	KJ137261	297	4.87859e-123	0.9	1	372	0	0	0	0	0	0	0	0	0	0	0	0	0	0	0	0	0	0	3	0	0	0	0	0	0	0	0	0
S1196_0003	Basidiomycota	Agaricomycetes	CCCCGTGCAGAGACACTGCGGCACAGTGAAAGTTTACACCTGGTGGTGCCCTTCCGTCAATTCCTTTAAGTTTCAGCCTTGCGACCATACTCCCCCCAGAACCCAAAGACTTTGATTTCTCGTAAGGTGCCGAATAACACATCAAAATTGAGGTTATCCGATCCCTAGTCGGCATAGTTTACTGTTAAGACTACAACGGTATCTGATCGTTTTCGATCCCCTAACCTTCGTTCTTGATTAATGAAAACATCCTTGGCAAATGCTTTCGCAGTAGTCGGTCTTGAGTCAATCCAAGAATTTCACCTCTAGCGACTCAATACCAATGCCCCCAACTATCCCTATTAATCATTACGGCGACTCTAGAAACCAACAAAATAGAACCGCACGTCCTATTTCATT…	AF082851	382	1.20876e-160	0.97	5	410	0	0	0	0	0	4	0	0	0	0	0	0	0	0	0	0	0	0	0	0	0	0	0	0	0	0	0	0
S1196_0004	Basidiomycota	Agaricomycetes	CCCCGTGCAGAGTTACTGCGGCTAGCTGTAATCAGTTTACACCTGGTGGTGCCCTTCCGTCAATTCCTTTAAGTTTCAGCCTTGCGACCATACTCCCCCCAGAACCCAAAGACTTTGATTTCTCGTAAGGTGCCGAGCGACACATCAAAAAGAGTTCACCCGATCCCTAGTCGGCATAGTTTACTGTTAAGACTACAACGGTATCTGATCGTTTTCGATCCCCTAACCTTCGTTCTTGATTAATGAAAACATCCTTGGCAAATGCTTTCGCAGTAGTTCATCTTCAGTCAATCCAAGAATTTCACCTCTAGCGACTGAATATGAATGCCCCCAACTATCCCTATTAATCATTACGGCAGCTCTAAAAACCAACAAAATAGAACCACACG	DQ444862	341	1.65304e-142	0.98	39	389	0	0	1	0	0	0	0	0	0	0	0	0	0	6	0	0	1	0	0	0	0	0	0	0	0	0	0	0
S1196_0006	Ascomycota	Eurotiomycetes	CCCCGTGTTGAGTTTACGCCTTGTGGTGCCCTTCCGTCAATTTCTTTAAGTTTCAGCCTTGCGACCATACTCCCCCCAGAACCCAAAAACTTTGATTTCTCGTAAGGTGCCGAACGGGTCATCATAAAAACACCGTCCGATCCCTAGTCGGCATAGTTTATGGTTAAGACTACGACGGTATCTGATCGTCTTCGATCCCCTAACTTTCGTTCACTGATTAATGAAAACGTCCTTGGCGAATGCTTTCGCAGTAGTTAGTCTTCAGCAAATCCAAGAATTTCACCTCTGACAGCCGAATACTGACGCCCCCGACCATCCCTATTAATCATTACGGCGGTCCTAGAAACCAACAAAATAGAACCGCACG	FJ358340	344	7.24473e-144	0.98	16	367	0	0	0	1	2	2	0	0	0	0	0	0	0	0	0	0	0	0	0	0	0	0	0	0	0	0	0	0
S1196_0009	Basidiomycota	Agaricomycetes	CCCCGTGTTGAGTCAAATTAAGCCGCAGGCTCCACCCCATGGTGGTGCCCTTCCGTCAATTCCTTTAAGTTTCAGCCTTGCGACCATACTCCCCCCAGAACCCAAAGACTTTGATTTCTCGTAAGGTGCCGAGCGACACATAATAAGGAGTTCGCCCGATCCCTAGTCGGCATAGTTTACTGTTAAGACTACAACGGTATCTGATCGTTTTCGATCCCCTAACCTTCGTTCTTGATTAATGAAAACATCCTTGGCAAATGCTTTCGCAGTAGTTAGTCTTCGGTAAATCTAAGAATTTCACCTCTAGCAACCGAATACTAATGCCCCCAACTGTCCCTATTAATCATTACGGCGTCACTAGAAACCAACAAAATAGAGACACACG	EU647021	360	6.2585e-151	0.96	2	385	3	4	4	9	13	6	3	0	0	0	1	19	29	1	1	4	2	1	5	9	7	81	5	8	3	6	0	1
S1196_0010	Ascomycota	Dothideomycetes	CCCCGTGTTGAGTCAAATTAAGCCGCAGGCTCCACTCCTGTTCAATTGTTAGCTATATTCATTCATTCATCGAATCGAGCGCCTTACCTGGTGGTGCCCTTCCGTCAATTTCTTTAAGTTTCAGCCTTGCGACCATACTCCCCCCAGAACCCAAAAACTTTGATTTCTCGAAAGGTGCCGAACGAGTCAAGAAAATAACATCGTCCGATCCCTAGTCGGCATAGTTTATGGTTAAGACTACGACGGTATCTGTTTGTATTGTTAGCTACTATCCAAAAATTCTTGTCTAGACAAAGGCTTACCTGATCGTCTTCGATCCCCTAACTTTCGTTCACTGATTAATGAAAACATCTTTGGCAAATGCTTTCGCAGTAGTTCGTCTTCCGCAAATCCAAGAAT…	GU561842	327	3.56234e-136	0.83	2	510	0	0	0	3	0	0	0	0	0	0	0	0	0	0	0	0	0	0	0	0	0	0	0	0	0	0	0	0
S1196_0013	Glomeromycota	Glomeromycetes	TCCCGTGTTAAGTCAAATTAAGCCACAGGCTCCACCCCTGGTGGTGCCCTTCTGTCAATTCCTTTAAGTTTCAGCCTTGCGACTATACTCCCCTCAGAACCCAAACACTTTGGTTTCCCGTAAGGCACCGAATGAGTTATTAAAAAATTAACATCATCCGATCCCTAGTCGGCATAGTTTATGGTTAAGACTACGACGGTATCTGATCGTCTTCGATCCCCTAACTTTCGTTCTTGATTAATGAAAACATCCTTGGCAAATGCTTTTGCAGTAGTTAGTCTTCAATAAATCCAAGAATTTCACCTCTGACAATTGAATACTAATGCCCCCAACTATCCCTATTAATCATTACGGCGACTCTAGAAACCAACAAAATAGAACCGCACGTCCTATTTCATT…	AY903711	376	5.48287e-158	0.96	2	407	0	0	0	0	0	2	0	0	0	0	0	0	0	0	0	0	0	0	0	0	0	0	0	0	0	0	0	0
S1196_0018	Ascomycota	Pezizomycetes	TCCCGTGTTGAGTCAAATTAAGCCGCAGGCTCCACTCCTGGTGGTGCCCTTCCGTCAATTCCTTTAAGTTTCAGCCTTGCGGCCATACTCCCCCCAGAACCCAAAAACTTTGATTTCTCATAAGATGCCGATGGTGTCTTTGAAACATCCACCGATCTCTAGTCGGCATAGTTTATGGTTAAGACTACGACGGTATCTGATCGTCTTCGATCCCCTAACTTTCGTTCTTGATCAATGAAAACATCCTTGGCAAATGCTTTCGCATTAGTTAGTCTTCAATAAATCCAAGAATTTCACCTCTGACAATTGAATACTGATGCCCCCGACTGTCCCTATTAATCATTACGGCGGTCCTAGAAACCAACAAAATAGAACCGCACG	U42643	342	5.81927e-143	0.95	2	381	0	0	0	0	0	0	0	0	0	0	0	0	0	0	0	0	0	0	0	0	0	0	4	0	0	0	0	0
S1196_0019	Chytridiomycota	Fungi_other	TCCCGTGTTGAGTCAAATTAAGCCGCAGGCTCCACTCCTGGTGGTGCCCTTCCGTCAATTCCTTTAAGTTTCAGCCTTGCGACCATACTCCCCCCGGAACCCAAAAACTTTGATTTCTCATAAGGTGCCGGACGGGTCATTAACAACACCGTCCGATCCCTAGTCGGCATCGTTTATGGTTAAGACTACGACGGTATCTAATCGTCTTCGATCCCCTAACTTTCGTTCTTGATTAATGAAAACATCCTTGGCAAATGCTTTCGCAAAAGTTTGTCTTGGGGAAATCCAAGAATTTCACCTCTAGCTCCCCAATACAAATGCCCCCAACTGTTCCTATTTATCATTACTGCGGTCCTGAAAGCCAACAAAATTAGGACCACTG	DQ536482	318	2.49871e-132	0.92	2	379	5	8	1	3	0	0	0	0	0	0	1	1	0	1	2	0	6	0	0	0	0	0	0	0	1	0	3	0
S1196_0021	Chytridiomycota	Fungi_other	TCCCGTGTTGAGTCAAATTAAGCCGCAGGCTCCACTCCTGGTGGTGCCCTTCCGTCAATTCCTTTAAGTTTCAGCCTTGCGACCATACTCCCCCCGGAACCCAAAAACTTTGATTTCTCATAAGGTGCCGAACGAGTCTCCTAAATGTAACTGCGTCCGATCCCTAGTCGGCATAGTTTATGGTTAAGACTACGACGGTATCTAATCGTCTTCGATCCCCTAACTTTCGTCCTTGATTAATGAAAACATCCTTGGCAAATGCTTTCGCATAAGTTGGTCTTCTGGAAATCCAAGAATTTCACCTCTGACTCCAGAGTACCAATGCCCCCAACTGTCCCTATTAATCATTATCTCCGTCTCGGAAACCAACAGAAACAAGACGGAAA	AY987439	311	3.19014e-129	0.92	2	374	2	0	0	0	0	0	0	0	0	0	0	1	0	0	0	0	0	0	0	0	0	0	0	0	0	0	0	0
S1196_0026	Ascomycota	Dothideomycetes	CCCCGTGTTGAGTCAAATTAAGCCGCAGGCTCCACGCCTGGTGGTGCCCTTCCGTCAATTTCTTTAAGTTTCAGCCTTGCGACCATACTCCCCCCAGAACCCAAACACTTTGATTTCTCCTAAGGTGCTGAGCGGGTCAGTGAAAATCACCGCCCAATCCCTAGTCGGCATAGTTTATGGTTAAGACTACGACGGTATCTGATCGTCTTCGATCCCCTAACTTTCGTTCACTGATTAATGAAAACATCCTTGGCAAATGCTTTCGCAGTAGTTAGTCTTCAATAAATCCAAGAATTTCACCTCTGACAATTGAATACTGATGCCCCCGACTGTCCCTATTAATCATTACGGCGGTCCTAAAAACCAACAAAATAGGACCGCACATCCTAT	U42480	367	5.03593e-154	0.97	1	390	0	0	0	2	0	0	0	0	0	0	0	0	0	0	0	0	0	0	0	0	0	0	0	0	0	0	0	0
S1196_0027	Basidiomycota	Fungi_other	CCCCGTGTTGAGTCAAATTAAGCCGCAGGCTCCACACCGTTGTGGTGCCCTTCCGTCAATTCCTTTAAGTTTCAGCCTTGCGACCATACTCCCCCCAGAACCCAAAGACTTTGATTTCTCGAAAGGTGCCGGGCGGGTCACGGAATGACATCGCTCGATCCCTAGTCGGCATCGTTTACTGTTAAGACTACAACGGTATCTAATCGTTTTTGATCCCCTAACCTTCGTTCTTGATCAATGAAAACGTCCTTGGCAAATGCTTTCGCAGTAGTCAGTCTTCCGGCAATCTAAGAATTTCACCTCTAGCAACGGAATACTAATGCCCCCGACCGTCCCTATCAATCATTACGGCGATCCTAGAAACCAACAAAATAGGAACGCACG	EF053565	342	5.87233e-143	0.94	1	384	0	0	0	0	0	0	0	0	0	0	0	0	0	0	0	0	3	0	0	0	0	0	0	0	0	0	0	0
S1196_0030	Chytridiomycota	Chytridiomycetes	TCCCGTGTTGAGTCAAATTAAGCCGCAGGCTCCACTCCTGGTGGTGCCCTTCCGTCAATTCCTTTAAGTTTCAGCCTTGCGACCATACTCTCCCCAGAACCCAAAAACTTTGATTTCTCATAAGGTGCCGATAAGGTCTTTATAGAGCCTTACCGATCCCTAGTCGGCATAGTTTATGGTTAAGACTACGACGGTATCTGATCGTCTTCGATCCCCTAACTTTCGTTCTTGATTAATGAAAACATCCTTGGCAAATGCTTTCGCAGTTGTTAGCCTTGAGAAAATCCAAGAATTTCACCTCTGACTTCTCAATACTAATGCCCCCAACTATCCCTATTAATCATTACTGCGGTCCTAGAAACCAACAAAATAGAACCATAGTCCTATTCCATTATTCCA…	DQ536473	347	3.79589e-145	0.93	2	404	0	0	0	0	0	0	0	0	0	0	0	0	4	0	0	0	0	0	0	0	0	0	0	0	0	0	0	0
S1196_0032	Basidiomycota	Fungi_other	CCCTGTGATGAGTCAAATTAAGTTGCAGGCTCCACACCTGGTGGTGCCCTTCTGTCAATTTCTTTAAGTTTCAGCCTTGCAACTATACTCCCCCCAGAACCCAAAGACTTTTATTTCTTGTAGGATGCTAAGCAACACATCATAATTGAGGTTGCCCAATCCCTAGTCAGCATAGTTTACTATTAAGACTATAATGGTATCTGATCATTTTTGATCCCCTAACCTTCATTCTTGATTAATGAAAACATCCTTGGCAAATGATTTCACAATAGTTGGTCTTGAGTCAATCCAAGAATTTCACCTCTAGCAACTTAATACCAATGTCCCCAACTATCCCTATTAATCATTATGGCAACTCTAGAAACCAACAAAATAGAACCACATG	DQ435798	323	1.53725e-134	0.92	1	383	0	0	0	0	0	0	0	0	0	0	0	0	0	0	0	0	0	0	2	0	0	0	0	0	0	0	0	0
S1196_0038	Ascomycota	Saccharomycetes	CCCCGTGTTGAGTCAAATTAAGCCGCAGGCTCCACTCCTGGTGGTGCCCTTCCGTCAATTCCTTTAAGTTTCAGCCTTGCGACCATACTCCCCCCAGAACCCAAAAACTTTGATTTCTCGTAGGGTGCCAACGCACTACTAAACGTGCGCTGATCCCCAGTCGGCATAGTTTACGGTTAAGACTACGACGGTATCTGATCATCTTCGATCCCCTAACTTCCGTTCTTGATTAATGAAAACATCCTTGGCAAATGCTTTCGCAGTAGTTAGTCTTCAGTTAATCCAAGAATTTCACCTCTGACAACTGAATACTGATGCCCCCGACTGTCCCTATTAATCATTACGACGGTCCTAGAAACCAACAAAATAGAACCATGCG	FJ176816	333	5.61104e-139	0.94	1	379	0	0	0	0	0	0	0	0	0	0	0	0	2	0	0	0	0	0	0	0	0	0	0	0	0	0	0	0
S1196_0042	Ascomycota	Fungi_other	CCCCGTGTTGAGTCAAATTAAGCCGCAGGCTCCACTCCTGGTGGTGCCCTTCCGTCAATTCCTTTAAGTTTCAGCCTTGCGACCATACTCCCCCTACAGAAATGAGTTAGCAAAATTCCTATTGAAATATAAAGAGTAAACAATGTGTAACGTACCCCGAGCCCAAAAACTTTGATTTCTCGTAAGGTGCCGAACGAGGCATAAAAAAACCACCGTCCGATCCCTAGTCGGCATAGTTTATGGTTAAGACTACGACGGTATCTGATCGTCTTCGATCCCCTAACTTTCGTTCACTGATTAATGAAAACATCCTTGGCGAATGCTTTCGCAGTAGTTAGTCTTCAATAAATCCAAGAATTTCACCTCTGACAATTGAATACTGACGCCCCCGACTATCCC…	JQ301627	343	2.50337e-143	0.9	1	442	0	0	1	0	0	0	0	0	0	14	1	0	0	0	0	0	0	0	0	0	0	0	0	0	0	0	0	0
S1196_0044	Basidiomycota	Agaricomycetes	CCGGCTGCTTTTTGGTGCAGAGCAAACTGTGGCTATAGTTTACACCTGGTGGTGCCCTTCCGTCAATTCCTTTAAGTTTCAGCCTTGCGACCATACTCCCCCCAGAACCCAAAGACTTTGATTTCTCGTAAGGTGCCGAGCAACACATCATAATTGAGGTCACCCGATCCCTAGTCGGCATAGTTTACTGTTAAGACTACAACGGTATCTGATCGTTTTCGATCCCCTAACCTTCGTTCTTGATTAATGAAAACATCCTTGGCAAATGCTTTCGCAATAGTCGGTCTTCAGTCAATCCAAGAATTTCACCTCTAGCGACTGAATACCAATGCCCCCAACTATCCCTATTAATCATTACGGCGATTCTAGAAACCAACAAAATAGAACCACACG	U59090	366	1.40896e-153	0.96	3	393	2	0	0	0	0	0	0	0	0	0	0	0	0	4	0	0	0	0	0	0	0	0	0	0	0	0	0	0
S1196_0045	Kickxellomycota	Kickxellomycetes	TCCCGTGTTGAGTCGAATTGAGCCGCAGGCTCCACTCCTGGTGGTGCCCTTCCGTCAATTCCTTTAAGTTTCAGCCTTGCGACCATACTCCCCCCGGAACCCAAAAACTTTGATTTCTCATACGGTGCCAAGCAAGTCATTAAAAATTAACATTGCCTGATCCCGAGTTGGCATAGTTTATGGTTAAGACTACGACGGTATCTAATCGTCTTCGATCCCCTAACTTTCGTTCTTGATTAATGAAAACATCCTTGACAGACGCTTTCGCATCAGTTTGTCTGGCACTGGTTCAAGTATTTCACCACTGACAGTGCCATACAAATGCCCCCAACTGTCCCTATTAATCATTACCTTGGCTTTAGAAACCAACAAAATAAAACCAAAGTCCTATTTTATTAT…	JN940691	396	7.55409e-167	0.98	1	408	0	5	0	0	0	0	0	0	0	0	2	14	2	1	0	3	5	0	0	0	0	0	1	0	0	0	0	0
S1196_0046		Fungi_other	CCCCGTGTTGAGTCAAATTAAGCCGCAGGCTCCCGTTTTATTGGGTTTACCAAACCTTACAAGTTTTCACTTGAAGCCGGACTATACCTTAAGCCTCATTAATGAGACCGACCTCCATCTAGTCTCTGAACCTGTCCCATAGAACTGAATTAATTCAACTCATTAGGGCCTTGGCTGCGGATTGTCCATTGTAATATCTTCAGAGCTGTTACCATACCCGAG	HQ827184	183	8.28316e-73	0.94	1	222	0	0	0	0	0	0	0	0	0	0	0	0	0	0	0	0	0	0	0	0	0	0	0	2	0	0	0	0
S1196_0048	Basidiomycota	Fungi_other	CCCCATGTTGAGTCAAATTAAGCTGCAGGCTCCATGCCTGGTGGTGCCCTTCTGTCAATTCCTTTGAGTTTCAGCCTTGTGACCATACTCCCCCAGAACCCAAAGACTTTGATTTCTTGTAAGGTGCTGAGCAACACATCATATCAAGGTTGCCCAATCCCTAGTCAGCATAGTTTACTGTTAAGACTACAATGGTATCTGATCGTTTTTGATCCCTTATCCTTTGTTCTTGATTAATGAAAACATCCTTGGCAAATGCTTTTGCAAAAGTTAGTCTTCTGTTAATCCAAGAATTTCACCTCTAGCAACAGAATACTAATGCCCCCAACTATCCCTGTTAATCATTACAGCAACTCTAAAAACCAGCAAAATAGAACTGCACATCCTATTTCATTATTC…	FJ171727	339	1.33542e-141	0.91	1	406	0	0	0	0	0	0	0	0	0	0	0	0	0	3	0	0	0	0	0	0	0	0	0	0	0	0	0	0
S1196_0051	Basidiomycota	Dacrymycetes	CCCCGTGTTGAGTCAAATTAAGCCGCAGGCTCCACTCCTGGTGGTGCCCTTCCGTCAATTCCTTTAAGTTTCAGCCTTGCGACCATACTCCCCCCAGAACCCAAAGACTTTGATTTCTCGCAAGGTGCCGAACGGGTTGTAAGATTAACCCCGTCCGATCCCTAGTCGGCATAGTTTACTGTTAAGACTACAACGGTATCTAATCGTTTTCGATCCCCTAACCTTCGTTCTTGATCAATGAAAACATCCTTGGCAAATGCTTTCGCAGAAGTTCGTCTTCGGTAAATCCAAGAATTTCACCTCTAGCAACCGAATACGAATGCCCCCAACTGTCCCTATTAATCATTACCGCGTCACTAGAAACCAACAAAATAGAGACGCACG	DQ667157	366	1.37177e-153	0.97	1	384	0	0	0	0	0	0	0	0	0	0	0	0	0	0	2	0	0	0	0	0	0	0	0	0	0	0	0	0
S1196_0052		Fungi_other	CCCCGTGTTGAGTCAAATTAAGCCGCAGGCTCCACTCCTGGTGGTGCCCTTCCGTCAATTCCTTTAAGTTTCAGCCTTGCGACCATACTCCCCCCAGAACCCAAAGACTTTGATTTCTCGTACCGTGCCGAGCCAGTCAAAAGTATAACGTGGCCCGATCCGGAGTCGGCATAGTAATCGTTTTCGATCCCCTAACCTTCGTTCTTGATTAATGAAAACATCCTTGGCAAATGCTTTCGCAGTAGTT	JX242892	192	9.71724e-77	0.9	1	247	1	0	0	1	0	1	0	4	0	8	0	0	0	0	0	0	0	0	0	0	0	0	0	0	0	1	0	1
S1196_0059	Mucoromycota	Fungi_other	CCCCGTGTTGAGTCAAATTAAGCCGCAGGCTCCACCCCTGGTGGTGCCCTTCCGTCAATTCCTTTAAGTTTCAGCCTTGCGACCATACTCCCCCCGGAACCCAAAAACTTGGCTTTCGCTGAAATGCTGAATGAGTCAATATAAATTAAAACATCATCCAATCTTTAGTCGGCATAGTTTATGGTTAAGACTACGACGGTATCTGATCGTCTTCGATCCCCTAACTTTCGTTCTTGATTAATGAAAACATCCTTGACAAATGCTTTCGCAGAAGTTAGTCTTCAATCAATCCAAGAATTTCACCTCTGACGATTGAATACTAATGTCCCCAACTATCCCTATTCATCATTACTTTGGCTTTAGAAACCAACGAAATAAAACCAAAAGTCCTATTTCATT…	AY903711	338	3.73475e-141	0.91	1	409	1	0	0	0	0	0	0	0	0	0	0	0	0	0	1	0	0	0	0	0	0	0	0	0	2	1	0	0
S1196_0062	Ascomycota	Fungi_other	ACCTGTGTTGAGTAAAAACTAAGTCACAGGATCTACTCCTTCTAGTGCCCTTCCGTCAACTCCTTTAAGTTTTCGCCTTGCGACCATACTCCCCGCAGAACCCAAAGACTTTAATTTCTTATGAGGTGCTGAGCGAGTCAAAATAGAACATCATGCAATCCCTCGTTGGCATAGTTTCTAGTTAAGACTACGACAGTATCTGATCGTCTTCGATCTCCTAACTTTCGTTCCTTGATTAATGAAAACATCCTTGGCAAATGCTTTCGCAGTAGTTAGTCGTCAATTGATCCAAGAATTTCACCTCTGACAATTGAATACTGATGCCCCCGACTATCCCTATTAATCATTACGGTGGTCCTAGAAACCAACAAAATAGAACCACACG	U62013	316	1.93913e-131	0.91	2	385	0	0	0	0	0	2	0	0	0	0	0	0	0	0	0	0	0	0	0	0	0	0	0	0	0	0	0	0
S1196_0064	Basidiomycota	Fungi_other	CCCCGTGTTGAGTCAAATTAAGCTGCAGGCTCCACACCTGGTGGTGCCCTTCTGTCAATTCCGATAAGTTGAAGCCTTGCGACCATACTCCCCCCAGAACCCAAAGACTGTGATACATAATATTTGAGATCACCCGATCCCTAGTCAGCATAGTTTACTGTTAAGACTACAATAGTATCTGATCGTTTTCGATCCCCTAACCTTCGTTCTTGATTAATAAAAACATCCTTGGCAAATGCTTTCGCAATAGTTGGTCTTGAGTCAATCCAAGAATTTCACCTCTAGCAACTCAATACCAATGCCCCCAACTATCCCTATTAATCATTACAGCGACTCTAGAAACCAACAAAATAGAACCACACA	DQ851575	290	5.96228e-120	0.9	2	362	0	0	0	0	0	0	0	0	0	0	0	0	0	0	0	0	3	0	0	0	0	0	0	0	0	0	0	0
S1196_0065	Basidiomycota	Agaricomycetes	CCCGCAATTTGAAGATGTCGCCCAGTAACATAGAACTGGACTAGCATTTAACTTTATGAACCTTAACGATTCAAAGGCTAACCACCTCACCCTTTAAGGCTGCTTTTTGGTGCAGAGTCACTGCGGCGAAGCTGTGATCAAGTTTACACCTGGTGGTGCCCTTCCGTCAATTCCTTTAAGTTTCAGCCTTGCGACCATACTCCCCCCAGAACCCAAAGACTTTGATTTCTCGTAAGGTGCCGAGCAACACATCAAAATTGAGGTTGCCCGATCCCTAGTCGGCATAGTTTACTGTTAAGACTACAACGGTATCTGATCGTTTTCGATCCCCTAACCTTCGTTCTTGATTAATGAAAACATCCTTGGCAAATGCTTTCGCAATAGTCGGTCTTGAGTCAA…	DQ457646	439	0	0.93	1	520	0	0	0	0	0	0	0	0	0	0	0	0	0	2	0	0	0	0	0	0	0	0	0	0	0	0	0	0
S1196_0066	Ascomycota	Saccharomycetes	CCCCGTGTTGAGTCAAATTAAGCCGCAGGCTCCACTCCTGGTGGTGCCCTTCCGTCAATTCCTTTAAGTTTCAGCCTTGCGACCATACTCCCCCCAGAACCCAAAAACTTTGATTTCTCGTAAGGTGCCGAGTGGGCCAATAAAAGGCACCGCCCGATCCCTAGTCGGCATAGTTTATGGTTAAGACTACGACGGTATCTGATCATCTTCGATCCCCTAACTTTCGTTCTTGATTAATGAAAACGTCCTTGGCAAATGCTTTCGCAGTAGTTAGTCTTCAGTAAATCCAAGAATTTCACCTCTGACAACTGAATACTGATGCCCCCGACCGTCCCTATTAATCATTACGATGGTCCTAGAAACCAACAAAATAGAACCATTCGTCCTATTCTATTATTC…	FJ381689	387	7.26659e-163	0.98	1	405	0	0	2	0	0	0	0	0	0	0	11	0	1	0	1	0	2	0	0	0	0	0	0	13	0	0	0	0
S1196_0072	Ascomycota	Sordariomycetes	TCCCGTGTTGAGTCAAATTAAGCCGCAGGCTCCACTCCTGGTGGTGCCCTTCCGTCAATTTCTTTAAGTTTCAGCCTTGCGACCTGAGAAATTCGAGTTAGCCAGTGTTCTAAACAGTGCATGAGGGAAATATTAAGGCTCATCACTTACCATACTCCCCCCGGAACGCAGAAGCTTGTACTTTCGTGTAAGGTGCCGAGCGGGTCAAAAAATAACACCGCCCGATCCCTAGTTCGCATAGTTTATGGTTAAGACTACGACGGTATCTGATCGTCTTCGATCCCCTAACTTTCGTTCCTGATTAATGAAAACATCCTTGGCAAATGCTTTCGCAGTAGTTCGTCTTCCATAAATCCAAGAATTTCACCTCTGACAATGGAATACGGATGCCCCCGACTG…	EU128056	275	3.36265e-113	0.95	149	451	0	0	0	0	0	0	0	0	0	0	0	0	0	0	0	0	0	0	2	0	0	0	0	0	0	0	0	0
S1196_0073	Basidiomycota	Tritirachiomycetes	CCCCGTGTTGAGTCAAATTAAGCCGCAGGCTCCACACCTGGTGGTGCCCTTCCGTCAATTCCTTTAAGTTTCAGCCTTGCGACCATACTCCCCCCCGAACCTAAACTTAAAGATTTCTCTTCAGGTGCTGGGAGAGTCATAAAAAATCCTCACCCAATCCCTAGTCGGCATCGTTTACTGATGGGACTACAACGGTATCTGATCGTTTTGGATCCCCCATCCTTCGTACTTGATCAATGCGCGCATCTTTGGCAAATGCTTTCGCAGTAGTTTGTCCTCAGCAAATCCAAGAATTTCACCTCTAGCAGCTGAATACAAATGCCCCCAACTACCGCTATTCATCATTACGGCGTTCCTAAAAACCAACGAATTAGGATCGCACGTCCTATTCTATTATTC…	DQ643633	379	2.54199e-159	0.97	1	405	0	0	0	0	0	0	0	0	0	0	0	0	0	0	0	0	0	0	0	0	0	0	3	0	0	0	0	0
S1196_0075	Basidiomycota	Cystobasidiomycetes	CCCCGTGTTGAGTCAAATTAAGCCGCAGGCTCCACACCTGGTGGTGCCCTTCCGTCAATTCCTTTAAGTTTCAGCCTTGCGACCATACTCCCCCCCGAACCTAAACTTAAAGATTTCTCTTCGGGTGCCGAGCGAGTCATAAATAATGCACGCCCGATCCCCAGTCGGCATCGTTTACTGTGGAGACTACAACGGTATCTGATCGTTTTCGATCCCCCCACCTTCGTTCTTGATCAATGAGCGCATCCTTGGCAAATGCTTTCGCAGTAGTTCGTCTTCAATAAATCCAAGAATTTCACCTCTAGCAATTGAATACGAATGCCCCCAACTACCTCTATTCATCATTACGGCGATCCTAGAAACCAACAAAATAGGACCGCACG	DQ832206	345	2.74511e-144	0.95	1	383	0	0	0	0	0	0	0	0	0	0	0	0	0	0	0	0	0	0	0	0	0	0	2	0	0	0	0	0
S1196_0076	Ascomycota	Sordariomycetes	TCCCGTGTTGAGTCAAATTAAGCCGCAGGCTCCACTCCTGGTGGTGCCCTTCCGTCAATTTCTTTAAGTTTCAGCCTTGCGACCTTTGAAAAACCTTCAGTTAGCAAGATATCCCAGAGCGAAGAAAAATAAGACAGCGGGTGTCTGAGAGAGGGGTTCAGAACTCACCATACTCCCCCCGGAACGCAGAAGCTTGTACTTTCGTGTAAGGTGCCGAACGAGTCAAAAAATAACATCGTTCGATCCCTAGTTCGCATAGTTTATGGTTAAGACTACGACGGTATCTGATCGTCTTCGATCCCCTAACTTTCGTTCCTGATTAATGAAAACATCCTTGGCAAATGCTTTCGCAGTAGTTCGTCTTCAATAAATCCAAGAATTTCACCTCTGACAATTGAA…	DQ470998	306	6.86864e-127	0.96	167	492	0	0	0	0	0	0	0	0	0	0	0	0	0	0	3	3	0	0	0	0	0	0	0	0	0	0	0	0
S1196_0077	Ascomycota	Pezizomycetes	CCCCGTGTTGAGTCAAATTAAGCCGCAGGCTCCACTCCTGGTGGTGCCCTTCCGTCAATTCCTTTAAGTTTCAGCCTTGCGACCATACTCCCCCCAGAACCCAAAGACTTTGATTTCCCGTAAGGTGCTGAGGGAGTCATAAAAGAGCTCTCCCAATCCCTAGTCGGCATAGTTTATGGTTAAGACTACGACGGTATCTGATCGTCTTCGATCCCCTAACTTTCGTTCAACTGATTAATGAAAACATCCTTGGCAAATGCTTTCGCAGTAGTTAGTCTTCAATTAATCCAAGAATTTCACCTCTGACAATTGAATACTGATGCCCCCGACTATCCCTATTAATCATTACGGTGGTCCTAGAAACCAACAAAATAGAACCACACG	DQ646535	382	1.12097e-160	0.99	1	384	0	0	0	0	62	1	0	0	0	0	0	0	1	0	0	1	0	0	0	0	0	2	2	0	0	0	0	0
S1196_0081	Basidiomycota	agaricomycetes	CCCCATGTTGAGTCAAATTAAGCCGCAGGCTCCACGCCTGGTGGTGCCCTTCCATCAATTCCTTTAAGTTTCAGCCTTGTGACCATACTCCCCCCAGAACCCAAAGACTTTGATTTCTTGTAAGGTGCTGAGCGACACATGATAGTGAGATTGCCTGATCCCTAGTCAGCATAGTTTACTGTTAAGACTACAATGGTATCTGATCGTTTTCGATCCCCTAACCTTCGTTCTTGATTAATGAAAACATCCTTGGCAAATGCTTTTGCAGAAGTTAGTCTACCATAAATCCAAGAATTTCACCTCTAGCAATGGAATACTAATGCCCCCAACTATCCCTATTAATCATTATGGCGACTCTTCTAGAAACCAACAAAATAGAACTGCATG	EF589729	345	2.77828e-144	0.95	1	385	0	0	0	0	0	0	0	0	0	0	0	0	0	0	0	3	0	0	0	0	0	0	0	0	0	0	0	0
S1196_0082	Ascomycota	Orbiliomycetes	CCCCGTGTTGAGTCAAATTAAGCCGCAGGCTCCACTCCTAAAGCAACAGGTTAGTATTAACATCGCAAGAAGATAAGGGGGAAAAAATTTTAAGAAAGGGAAAGGGAGGGAAGCTTACCTGGTGGTGCCCTTCCGTCAATTCCTTTAAGTTTCAGCCTTGCGACCATACTCCCCCCAGAACCCAAAGACTTTGATTTCTCGTAAGGTGCCGAGCGGGTCATAAATTAAACACCACCCGATCCCTAGTCGGCATAGTTTATGGTTAAGACTACGACGGTATCTGATCGTCTTCGATCCCCTAACTTTCGTTCACTGATTAATGAAAACATCCTTGGCAAATGCTTTCGCAGTAGTTAGTCTTCAATAAATCCAAGAATTTCACCTCTGACAATTGAATAC…	AY970524	344	9.46345e-144	0.99	118	465	0	0	0	0	0	0	0	0	0	0	0	0	0	0	0	0	0	0	0	3	0	0	0	0	0	0	0	0
S1196_0083	Basidiomycota	Agaricomycetes	CCCCGTGTTGAGTCAAATTAAGCCGCAGGCTCCACTCCTGGTGGTGCCCTTCCATCAATTCCTTTCAGTTTCAGCCTTGCGACCATACTCCCCCCCGAACCCAAAGACTTTGATTTCTCATAAGGTGCCAAACGACACATCGAATTGAGGTTGCCTGATCCCTAGTCGGCATAGTTTACTGTTAAGACTACAACGGTATCTGATCGTTTTCAATCCCCTAACCTTCATTCTTGATTAATAAAAACATCCTTGGCAAATGCTTTCGCAGTAGTTAGTCTTCAGTAAATCCAAGAATTTCACCTCTAGCAACTGAATACTAATGCCCCCAACTATCCCTATTAATCATTACGGCGACTCTAGAAACCAACAAAATAGAACCGCACGTCCTATTCCATTATT…	AF393043	381	3.32404e-160	0.96	1	407	0	0	0	0	0	0	0	0	0	0	0	0	0	0	0	0	0	0	0	0	0	0	0	0	0	4	0	0
S1196_0086	Basidiomycota	Agaricomycetes	CCCCGTGTTGAGTCAAATTAAGCCGCAGGCTCCACACCTGGTGGTGCCCTTCCGTCAATTCCTTTAAGTTTCAGCCTTGCGACCATACTCCCCCCAGAACCCAAAGACTTTGATTTCTCGTAAGGTGCCGAGCGACACATGATATTTGTGGTACGCCCGATCCCTAGTCGGCATAGTTTACTGTTAAGACTACAACGGTATCTGATCGTTTTCGATCCCCTAACCTTCGTTCTTGATTAATGAAAACATCCTTGGCAAATGCTTTCGCAGTAGTTGGTCTTGAGTCAATCCAAGAATTTCACCTCTAGCGACTCAATACCAATGCCCCCAACTATCCCTATTAATCATTACGGCGACTCTAGAAACCAACAAAATAGAACCGCACG	JF706314	378	6.66999e-159	0.99	1	386	10	187	28	73	211	69	4	0	0	11	40	1631	359	23	12	9	13	6	25	293	687	87	32	106	4	23	28	29
S1196_0088		Fungi_other	CCCCGTGTTGAGTCAAATTAAGCCGCAGGCTCCACACCTGGTGGTGCCCTTCCGTCAATTCCTTTAAGTTTCAGCCTTGCGACCATACTCCCCCCAGAACCCAAAGACTTTGATTTCTCGTAAGGTGCTGAGCAACACATCATAATTGAGGTTGCCCAATCCCTAGTCGGCATAGTTTACTGATCGTTTTCGATCCCCTAACCTTCGTTCTTGATTAATGAAAACATCCTTGGCAAATGCTTTCGCAATAGT	DQ435798	205	1.73675e-82	0.91	1	252	0	0	0	2	0	0	0	0	0	0	0	1	0	3	0	1	0	6	12	0	4	2	1	0	0	2	0	0
S1196_0089	Basidiomycota	Fungi_other	CCCCGTGTTGAGTCAAATTAAGCCCTGGTGGTACCCTTCTATCAATTCCTTTAAGTTTCAGCCTTGCGACCATACTCCCCCAGAACCCAAAGACTTTGATTTCTCGTAAGGTGCTGCTGAGCAAACACATCATAATTGAGGTTGCCCGATCCCTAGTCGGCATAGTTTACTGTTAAGACTACAATGGTATCTGATCGTTTTTGATCCCCTAACCTTCGTTCTTGATTAATGAAAACAGCCTTGGCAAATGCTTTCGCAATAGTCGGTCTTGAGTCAATCCAAGAATTTCACCTCTAGCAACTCAATACCAATGCCCCCAACTATCCCTATTGATTATTACGGCAACTCTAGAAACCAACAAAATAGAACTGCACG	DQ457696	314	1.44652e-130	0.94	11	375	0	0	0	0	0	0	0	0	0	0	0	0	0	0	0	0	0	0	0	0	0	0	0	0	0	0	0	0
S1196_0094		Fungi_other	CCCCGTGTTGAGTCAAATTAAGCCGCAGGCTCCCGTTTTATTCGGTAAACCAAACCTTGCAAGTTTTCACTTGAAGCCGGACTATACCTTAAGCCTACAAGAGACCGACCCCCATCTAGTCTCTGAACCTGTCCCGTAAAGTCCTAAAATAAGACTCCTTAGGGCCTTGGCTGCGGATTGTCCATTGTAACATCTTCAGTTCTTTTACCATACCCGAGGCTATTAACCTTGCC	HQ827178	175	3.08292e-69	0.9	1	233	0	0	0	0	0	0	2	0	0	0	0	0	0	0	0	0	0	0	0	0	0	0	0	0	0	0	1	0
S1196_0096	Chytridiomycota	Chytridiomycetes	CCCCGTGTTGAGTCAAATTAAGCCGCATGCTCCACTCCTGGTGGTGCCCTTCCGTCAATTCCTTTAAGTTTCAGCCTTGCGACCATACTCTCCCCGGAACCCAAAAACTTTGATTTCTCATAAGGTGCCGAACGGCTCAATAAAGGTAAACCGTCCGATCCCTAGTCGGCATAGTTTATGGTTAAGACTACGACGGTATCTGATCGTCTTCGCTCCCCTAACTTTCGTTCTTGATTAATGAAAACATCCTTGGCAAATGCTTTCGCAGAAGTTAGTCTTTAATAAATCCAAGAATTTCACCTCTGACAATTAAATACTAATGCCCCCAACTATCCCTATTAATCATTACTTCGGTCCTAGAAACCAACAAAATAGAACCAAAG	JN020240	361	2.24323e-151	0.97	1	383	0	2	3	0	0	0	0	0	0	0	0	0	0	0	0	0	3	0	0	0	0	2	2	0	0	0	0	0
S1196_0097	Ascomycota	Eurotiomycetes	CCCCGTGTTGAGTCAAATTAAGCCGCAGGCTCCACGCCTGGTGGTGCCCTTCCGTCAATTTCTTTAAGTTTCAGCCTTGCGACCATACTCCCCCCAGAACCCAGAAACTTTGATTTCTCGTAAGGTGCCGAACGGGTCATCAGTAAATACCCCGTCCGATCCCTAGTCGGCATAGTTTATGGTTAAGACTACGACGGTATCTGATCGTCTTCGATCCCCTAACTTTCGTTCCCTGATTAATGAAAACATCCTTGGCGAATGCTTTCGCAGTAGTTAGTCTTCGGCAAATCCAAGAATTTCACCTCTGACAGCCGAATACTGACGCCCCCGACCATCCCTATTAATCATTACGGCGGTCCTAGAAACCAACAAAATAGAACCGCGCG	FJ358340	370	2.33329e-155	0.98	1	386	10	101	7	102	973	1167	76	11	0	5	2	102	190	0	7	3	0	0	1	21	11	18	24	0	8	12	16	17
S1196_0098	Mortierellomycota	Mortierellomycetes	CCCCAGTTGAGTCAAATTAAGCCGCAGGCTGCACTCTTGGTGATGCCCTTCCGTCAATTCCTTTAAGTTTCAGCCTTGCGACCATACTCCCTCCGGAACCCAAAACTTTGATTTCTCATAAGGTGGCAAACAAGTCAAAAAATCCTTGTCTGATCCCTAGTCGGCATAGTTTATGGTTAAGACTACGACGGTATCTGGTCGTCTTCGATCCCCTAACTTTCGTTCTTGATTAATGAAAACATCCTTGGCAAATGCTTTCGCAGAAGTTAGTCTTTCATAAATCCAAGAATTTCACCTCTGACAATTAAATGCTAATGCCCCCAACTATCCCTATTAATCATTACTTCGGTCCTAGAAACCAACAAAATACAACCAAAGTCCTATTCCATTATTCCATGC…	DQ643631	372	3.1702e-156	0.96	1	401	0	0	0	0	0	0	0	0	0	0	0	0	0	3	0	0	0	0	0	0	0	0	0	0	0	0	0	0
S1196_0101	Chytridiomycota	Chytridiomycetes	CCCCGTGTTGAGTCAAATTAAGCCGCAGGCTCCACTCCTGGTGGTGCCCTTCCGTCAATTCCTTTAAGTTTCAGCCTTGCGACCATACTCCCCCCGGAACCCAAAAACTTTGATTTCTCATAAGGTGCCGATGGGGTCAAAATATAAAAACACCCACCGATCCCTAGTCGGCATAGTTTATGGTTAAGACTACGACGGTATCTAATCGTCTTGGATCCCCTAACTTTCGTTCTTGATTAATGAAAACATCCTTGGCAAATGCTTTCGCAGAAGTTAGTCTTTCATAAATCCAAGAATTTCACCTCTGACAATTAAATACTAATGCCCCCAACTATCCCTATTAATCATTACTTCGGTCCTAGAAACCAACAAAATAGAACCAAAATCCTATTCCATTAT…	JN020240	376	5.45215e-158	0.96	1	407	0	0	0	0	0	0	0	0	0	0	2	5	2	2	0	0	0	0	0	0	5	2	0	0	0	0	0	1
S1196_0102	Ascomycota	Dothideomycetes	CCCCGTGTTGAGTCAAATTAAGCCGCAGGCTCCACTCCTAATACAAAAGTTAGCATATATAGACGCGGAAAAAGGAGGAAGGACACTCGATTACCTGGTGGTGCCTTTCCGTCAATGTCATTTAAGTTTCGGCCTTGCGACTATACTCCCCCCAGAACTCAAACGCTTAATGATTTCTCGTCAGGTGCCGGTCAAGTCAAAAAAGAAACATTGACCGATCCCTAGCTAGTATAGTTTATGGTCGGGACTACGACGGTATCTGTATGAAGTGTTAGTGCTTATATAAGATTAATCCAGATTAGCTATGACATACCTGATCGTCTTCGATCCCCAGACTTTCGCTCCTGATTAATGAAAACATCCTTGGCAAATGCTTTCGCAGTAGTTAGTCTTCAATAA…	GU561842	277	4.87776e-114	0.81	2	491	0	0	0	0	0	0	0	0	0	0	0	0	0	0	0	0	0	0	0	0	0	3	0	0	0	0	0	0
S1196_0103	Ascomycota	Sordariomycetes	CCCCGTGTTGAGTCAAATTAAGCCGCAGGCTCCACTCCTGGTGGTGCCCTTCCGTCAATTTCTTTAAGTTTCAGCCTTGCGACCATACTCCCCCCAGAACCCAAAAACTTTGATTTCTCGTAAGGTGCCGATGGAGTCAAAAAAGTAACATCCACCGATCCCTAGTCGGCATAGTTTATGGTTAAGACTATTTAAACTGTTAGTAAAATTTATTCTAAATTATATATTTTGATTGTAAATATTAACTCACCTACGACGGTATCTGATCGTCTTCGATCCCCTAACTTTCGTTCACTGATTAATGAAAACATCCTTGGCAAATGCTTTCGCAGTAGTTAGTCTTCAATAAATCCAAGAATTTCACCTCTGACAATTGAATACTGATGCCCCCGACTGTCC…	GU296175	240	1.06318e-97	0.87	101	447	1	22	6	0	6	0	13	0	0	2	13	0	0	6	8	9	0	0	0	0	0	1	1	6	2	3	1	0
S1196_0108	Ascomycota	Fungi_other	CCCCGTGTTGAGTCAAATTAAGCCGCAGGTTCCACGCCTGGTGGTGCCCTTCCGTCAATGTCTTTAAGTTTCAGCCTTGCGACCATACTCCCCCCAGAACCCGAAGACTTTGATTTCTCGTACAGTGCCGAACGGGTCAAAATGATAACACCGTCCGATCCTGAGTCGGCATCGTTTATGGTTAAGACTACGACGGTATCTGATCGTCTTCGATCCCCTAACTTTCGTTCACTGATTAATGAAAACATCCTTGGCAAATGCTTTCGCAGTAGTTAGTCTTCAATAAATCCAAGAATTTCACCTCTGACAATTGAATACTGCAAATATAAGTTAGCACATCTGACCACAAATTTTGGGGGAGGAACGAGCCTTACCTGATGCCCCCGACTATCCCTATTA…	JQ627473	356	4.31855e-149	0.91	1	437	0	0	0	0	0	0	0	0	0	0	0	0	0	0	0	0	0	0	0	0	0	0	0	0	0	0	0	0
S1196_0112		Fungi_other	CCCCGTGTTGAGTCAAATTAAGCCGCAGGCTCCACTCCTGGTGGTGCCCTTCCGTCAATTTCTTTAAGTTTCAGCCTTGCGACCATACTCCCTGTGATGAAGTTAGCATTCTGTGTTATCTGTGTTGTAGAAATGGTGACTTACCCCCAGAACCCAAAAACTTTGATTTCTCGTAAGGTGCCGAGCGAGTCAGAATGTAACATCGCCCGATCCCTAGTCGGCATAGTTTATGGTTAAGACTACGACGGTATCTGATCGTCTTCGATCCCCTAACTTTCGTTCACTGATTAATGAAAACATCCTTGGCAAATGCTTTCGCAGTAGTTTGTCTTCCACAAATCCAAGAATTTCACCTCTGACAGTGGAGTACAGATGCCCCCGACTATCCCTATTAATCAT…	JQ301627	325	2.30499e-135	0.89	1	428	0	0	0	0	0	0	0	0	0	0	0	0	0	0	3	0	0	0	0	0	0	0	0	0	0	0	0	0
S1196_0113	Basidiomycota	Agaricomycetes	ACTCTCTGGACCTGGTGAGTTTCCCCGTGTTGAGTCAAATTAAGCCGCAGGCTCCACTCCTGGTGGTGCCCTTCCGTCAATTCCTTTAAGTTTCAGCCTTGCGACCATACTCCCCCCAGAACCCAAAGACTTTGATTTCTCGTAAGGTGCCGAACGACGCATAATATTGAGGTCGTCCGATCCCTAGTCGGCATAGTTTACTGTTAAGACTACAACGGTATCTGATCGTTTTCGATCCCCTAACCTTCGTTCTTGATTAATGAAAACATCCTTGGCAAATGCTTTCGCAATAGTTTGTCTTGCGTAAATCCAAGAATTTCACCTCTAGCAACGCAATACAAATGCCCCCAACTATCCCTATTAATCATTACGGCGACTCTAGAAACCAACAAAATAGAA…	U59093	421	6.73852e-178	0.99	5	429	0	0	9	7	3	2	0	4	0	10	8	2	1	0	1	7	0	4	0	2	4	8	0	4	1	12	0	1
S1196_0114	Cryptomycota	Cryptomycota	TCCCGTGTTGAGTCAAATTAAGCCGCAGGCTCCACTCCTGGTGGTGCCCTTCCGTCAATTCCTTTAAGTTTCAGTCTTGCGACCATACTCCCCCCGGAACCCAAAAACTTTGATTTCTCATAAGGTGCCAATGGAGTCAAAAACAACGTCCACTGATCCCTAGTCGGCATAGTTTATGGTTAAGACTACGACGGTATCTAATCGTCTTCGATCCCCTAACTTTCGTTCTTGATTAATGAAAACATCCTTGGCAAATGCTTTCGCAGTAGTTAGTCTCGAGGAAATCCAAGAATTTCACCTCTGACTCCTCGATACTAATGCCCCCAACTGTCCCTATTAATCATTACTCTGGTCCTAGAAACCAACAAAATAGAACCAAAG	AF372713	336	2.64698e-140	0.94	1	381	0	0	0	0	0	0	0	0	0	0	2	0	0	0	0	0	0	0	0	0	0	0	0	0	0	0	0	0
S1196_0116	Basidiomycota	Pucciniomycetes	CCCCGTGTTGAGTCAAATTAAGCCGCAGGCTCCACCCCTGGTGGTGCCCTTCCGTCAATTCCTTTAAGTTTCAGCCTTGTGACCGTACTCCCCCACGAACCTAAACTTCAGGTTTCCCTTTGGGTGCTGAACAAGTCATAAAAAAGTCTTGTCCAATCCCCAGTCGGCATAGTTTACTGTTAAGACTACAACGGTATCTGATTGTTTTTGATCCCCTAACCTTCGTTCTTGATCAATGAAAACATCCTTGGCAAATGCTTTCGCAGTAGTTTGTCTTACATCAATCCAAGAATTTCACCTCTGACGATGTAATACAAATGCCCCCGACTATCCCTATTAATCATTACGGCGATCCTAGAAACCAACAAAATAGGACCGCACG	DQ198787	368	1.77295e-154	0.98	1	382	0	0	0	0	0	0	0	0	0	0	1	0	4	3	0	0	0	0	0	0	0	0	0	0	0	0	0	0
S1196_0117	Ascomycota	Sordariomycetes	GTTCTGGACCTGGTGAGTTTCCCCGTGTTGAGTCAAATTAAGCCGCAGGCTCCACCCCTGGTGGTGCCCTTCCGTCAATTTCTTTAAGTTTCAGCCTTGCGACCATACTCCCCCTGGAGCCCAAGCACTTTGATTTCTCGTAAGGTGCCGAACGAGTCAAAATATAACATCGTCCGATCCCTAGTCGGCATAGTTTATGGTTAAGACTACGACGGTATCTGATCGTCTTCGATCCCCTAACTTTCGTTCCTGATTAATGAAAACATCCTTGGCAAATGCTTTCGCAGTAGTTAGTCTTCAATAAATCCAAGAATTTCACCTCTGACAATTGAATACTGATGCCCCCGACTGTCCCTATTAATCATTACGGCGGTCCTAGAAACCAACAAAATAGAACCA…	JQ899034	401	4.54085e-169	1	3	403	1046	1234	399	342	4146	163	10573	342	6	95	2115	1354	1431	1188	10591	160	347	170	115	2073	361	589	3882	5046	6380	335	189	97
S1196_0119	Ascomycota	Fungi_other	CCCCGTGTTGAGTCAAATTAAGCCGCAGGCTCCACTCCTGGTGGTGCCCTTCCGTCAATTCCTTTAAGTTTCAGCCTTGCGACCATACTCCCCCCAGAACCCAAAAACTTTGATTTCTCACAAGGTGCCGAGCGCGTTTCGAAAAAACGTACACCGCCCGATCCCTAGTCGGCATAGTTTATGGTTAAGACTACGACGGTATCTAATCGTCTTCGATCCCCTAACTTTCGTTCTTGATTAATGAAAATGTCCTTGGCAAATGCTTTCGCAGTAGTTGGTCTTTAATAAATCCAAGAATTTCACCTCTGACAATTAAATACCAATGCCCCCAACCATTCCTATTAATCATTACTCTGGTCCTAGAAACCAACAAAATAGAACCAGCGTCCTATTTCATTA…	AY695397	351	6.50904e-147	0.93	1	409	0	0	0	0	0	0	0	0	0	0	0	0	0	5	0	0	0	0	0	0	0	0	0	0	0	0	0	0
S1196_0120	Ascomycota	Dothideomycetes	TCCCGTGTTGAGTCAAATTAAGCCGCAGGCTCCACGCCTGGTGGTGCCCTTCCGTCAATTTCTTTAAGTTTCAGCCTTGCGACCATACTCCCCCCAGAACCCAAAAACTTTGATTTCTCGTAAGGTGCCGATCGAGTCAAAAGAAAAACATCGACCGATCCCTAGTCGGCATAGTTTATGGTTAAGACTGCCAAATTGTTAGTATTAAGTTTCGCTTTACAGCATTCTCACAATGTTTCACTCACCTACGACGGTATCTGATCGTCTTCGATCCCCTAACTTTCGTTCACTGATTAATGAAAACATCCTTGGCAAATGCTTTCGCAGTAGTTAGTCTTCAGCAAATCCAAGAATTTCACCTCTGACAGCTGAATACTAGTGCCCCCGACTGTCCCTATT…	GU561841	330	1.50583e-137	0.86	1	465	2	0	0	0	0	0	0	0	0	0	0	0	0	0	0	0	0	0	0	0	0	0	0	0	0	0	0	0
S1196_0122	Ascomycota	Dothideomycetes	CCCCGTGTTGAGTCAAATTAAGCCGCAGGCTCCACTCCTGGTGGTGCCCTTCCGTCAATTTCTTTAAGTTTCAGCCTTGCGACCATACTCCCCCCAGAACCTTACTTTGATTTCTCTTAACATGCCAAACGAGTCATTATTAAACATCGTCTGATCTGTAGTCGGCATAGTTTACGGTTAAGACTACGACGGTATCTATTAAATATTAGCAACTGGTTGATAAAGTGTTTATGAGTGGTACTGACCTGATCGTCTTCGATCCCCTAACTTTCGTTCACTGATTAATGAAAACATCCTTGGCAAATGCTTTCGCAGTAGTTAGTCTTCAATAAATCCAAGAATTTCACCTCTGACAATTGAATACTGATGCCCCCGACTATCCCTATTAATCATTACGGC…	GU561841	318	2.86973e-132	0.88	2	431	0	0	0	0	0	0	0	0	0	0	0	0	0	0	0	0	4	0	0	0	0	0	0	0	0	0	0	0
S1196_0125	Chytridiomycota	Fungi_other	TCCCGTGTTGAGTCAAATTAAGCCGCAGGCTCCACTCCTGGTGGTGCCCTTCCGTCAATTCCTTTAAGTTTCAGCCTTGCGACCATACTCCCCCCGGAACCCAAAAACTTTGATTTCTCTAAAGGTGCTGATAAAGTCTTTTTTGTTATATTAAACTTTTACCAATCCCTAGTCGGCATCATTTACAGTTAAGACTACGACGGTATCTGATCGTCTTCGATCCCCTAACTTTCGTTCTTGATTAATGAAAACATCCTTGGTAAATGCTTTCGCAGAAGTTAGTCTTTCATAAATCCAAGAATTTCACCTCTGACAATGAAATACTAATACCCCCAACTGTCCCTATTGATCATTACTTCTGATTTAGTGGTAAAAACCAACAAAAATAAAAACCAGTAA…	HQ901772	296	1.47094e-122	0.9	1	391	0	0	0	0	0	0	1	0	0	0	0	1	0	0	1	0	0	0	2	0	0	0	0	0	0	0	0	0
S1196_0126	Basidiomycota	Agaricomycetes	CCCCGTGTTGAGTCAAATTAAGCCGCAGGCTCCACCCCTGGTGGTGCCCTTCCGTCAATTTCTTTAAGTTTCAGCCTTGCGACCATACTCCCCCCAGAACCCAAAGACTTTGATTTCTCGTAAGGTGCCGAACGAGTCAATATGTAACTTCGCCCGATCCCTAGTCGGCATAGTTTACTGTTAAGACTACAACGGTATCTGATCGTTTTCGATCCCCTAACCTTCGTTCTTGATTAATGAAAACATCCTTGGCAAATGCTTTCGCAGTAGTTAGTCTTCAGTAAATCCAAGAATTTCACCTCTAGCAACTGAATACTAATGCCCCCAACTATCCCTATTAATCATTACGGCGACTCTAGAAACCAACAAAATAGAACCGCACGTCCTATTTTATTATTC…	DQ834916	385	5.60428e-162	0.97	1	406	49	24	0	23	64	2	35	6	0	8	9	62	188	65	7	0	45	1	0	0	0	10	0	3	0	8	4	8
S1196_0128	Ascomycota	Fungi_other	CCCCGTGTTGAGTCAAATTAAGCCGCAGGCTCCACGCCTTGTGGTGCCCTTCCGTCAATTTCTTTAAGTTTCAGCCTTGCGACCATACTCCCCCCAGAACCCAAAAACTTTGATTTCTCGTAAGGTGCCGAACGGGTCATCATAGAATCCCGTCCGATCCCTAGTCGGCATAGTTTATGGTTAAGGATCGTCTTCGATCCCCTAACTTTCGTTCCCTGATTAATGAAAACATCCTTGGCGAATGCTTTCGCAGTAGTT	GQ120164	227	3.21325e-92	0.94	1	258	0	0	0	1	1	0	4	17	0	0	0	0	0	0	2	0	0	0	0	10	0	0	7	1	3	0	0	0
S1196_0129	Basidiomycota	Agaricomycetes	CCCTGTGTTGAGTCAAATTAAGCTGCAGGCTCCACACCTGGTGGTGCCCTTCCATCAATTCCTTTAAGTTTCAGCCTTGTGACCATACTCCCCCCAGAACCCAAAGACTTTGATTTCTCATAAGGTGCTAAACAACACATCAAAATTGAGGTTGTCCAATCCCTAGTTGGCATAGTTTACTGTTAAGACTACAATGGTATCTGATTGTTTTTGATCCCCTAACCTTCATTCTTGATTAATGAAAACATCCTTGGCAAATGCCTTTGCAATAGTCGGTCTTGAGTCAATCCAAGAATTTCACCTCTAGCGACTCAATACCAATGCCCCCAACTATCCCTATTAATCATTACGGCGACTCTAGAAACCAACAAAATAGAACCGCACG	DQ435811	353	7.89464e-148	0.95	1	385	0	0	0	0	0	0	0	0	0	0	0	0	4	0	0	0	0	0	0	0	0	0	0	0	0	0	0	0
S1196_0130	Chytridiomycota	Chytridiomycetes	CCCCGTGTTGAGTCAAATTAAGCCGCAGGCTCCACTCCTGGTGGTGCCCTTCCGTCAATTCCTTTAAGTTTCAGCCTTGCGACCATACTCCCCCCGGAACCCAAAAACTTTGATTTCTCATAAGGTGCCGAACGTGGCAAAAAATTCCTCGTCCGATCCCTAGTCGGCATAGTTTATGGTTAAGACTACGACGGTATCTGATCGTCTTCGATCCCCTAACTTTCGTTCTTGATTAATGAAAACATCCTTGGCAAATGCTTTCGCAGAAGTTAGTCTTTCATAAATCCAAGAATTTCACCTCTGACAATTAAATACTAATGCCCCCAACTATCCCTATTAATCATTACGGCGACTCTAGAAACCAACAAAATAGAACCGCACG	DQ973004	353	7.82352e-148	0.96	1	382	127	147	216	65	67	79	19	9	0	19	22	67	8	13	10	2	51	7	5	1	2	21	4	28	5	3	36	11
S1196_0135	Ascomycota	Laboulbeniomycetes	CCCCGTGTTGAGTCAAATTAAGCCGCAGGCTCCACGCCTGGTGGTGCCCTTCCGTCAATTTCTTTAAGTTTCAGCCTTGCGACCATACTCCCCCCAGAACCCAAAAACTTTGATTTCTCGTAAGGTGCCGAGTGAGTCATTTGATTATACGCCACCCGATCCCTAGTCGGCATAGTTTACGGTTAAGACTACGACGGTATCTGATCGTCTTCGATCCCCTAACTTTCGTTCCTGATTAATGAAAACATCTTTGGCAAATGCTTTCGCAGTAGTTAGTCTTCAATTAATCCAAGAATTTCACCTCTGACAATTGAATACTGATGCCCCCAACTATCCCTATTAATCATTACGGCGGTCCTAGAAACCAACAAAATAGAACCACACG	FJ176839	365	3.81565e-153	0.97	1	385	0	3	0	0	0	0	3	0	0	0	0	0	0	0	0	0	0	0	0	0	0	0	0	0	0	0	0	0
S1196_0136	Mortierellomycota	Mortierellomycetes	CCCCGTGTTGAGTCAAATTAAGCTGCAGGCTCCACTCCTGGTGGTGCCCTTCCATCAATTCCTTTAAGTTTCAGCCTTGCAACCATACTCCCCCCAGAACCCAAAAACTTTGATTTCTCATAAGGTGCCAAACAAGTCAAAAAATCCTTGTCTGATCCCTAGTCGGCATAGTTTATGGTTAAGACTACGATGGTATTTGATCATCTTCGATCCCCTAACTTTCGTTCTTGATTAATGAAAACATCCTTGGCAAATGCTTTCGCAGAAGTTAGTCTTTCATAAATCCAAGAATTTCACCTCTGACAATTAAATACTAATGCCCCCAACTATCCCTATTAATCATTACTTCGGTCCTAGAAACCAACAAAATAGAACCAAAG	DQ643631	362	8.01565e-152	0.97	1	380	1	2	2	0	2	0	0	0	0	1	1	0	5	0	1	1	0	0	0	0	0	0	1	1	3	0	0	0
S1196_0141	Chytridiomycota	Chytridiomycetes	TCCCGTGTTGAGTCAAATTAAGCCGCAGGCTCCACTCCTGGTGGTGCCCTTCCGTCAATTCCTTTAAGTTTCAGACTTGCGACCGTATTTCCCCCAGAACCCAAAAACTTTGATTTCTCCTACGGTGCCGATGCGGCTCTATATTCACCCCACCGATCCCGAGTCGGCATCGTTTATGGTTAAGACTACGACGGTATCTAATCGTCTTCGATCCCCTAACTTTCGTTCTTGATTAATGAAAACATCCTTGACAAATGCTTTCGCAGTAGTCAGTCTTCCAGCAATCCAAGAATTTCACCTCTGACACTGAAATACTAATGTCCCCAACTGTCCCTATTAATCATTACCTTGGCCCTAGAAACCAACAAAATAGAACCATGA	EU154974	330	1.20402e-137	0.94	2	378	0	0	0	0	0	0	0	0	0	0	0	0	0	0	0	0	0	0	0	2	0	0	1	0	0	0	0	0
S1196_0147	Basidiomycota	Fungi_other	CCCCGTGTTGAGTCAAATTAAGCCGCAGGCTCCACTCCTGGTGGTGCCCTTCCGTCAATTCCTTTAAGTTTCAGCCTTGCGACCATACTCCCCCCTGAACCTTACTTAAAGATTTCTCTTCAGGTGCTGATGCGGTCATAAAATGAAATCCGCACCAATCCCTAGTCGGCATCGTTTACTGTCGAGACTACAACGGTATCTAATCGTTTTCGATCCCCCGACCTTCGTTCTTGATCAATGAAAGCGTCCTTGGCAAATGCTTTCGCAGTAGTTTGTCTTCAATAAATCCAAGAATTTCACCTCTAGCAATTGAATACAAATGCCCCCAACCGCCCCTATTTATCATTACGGTTTTTCTAAAAGACCAATAGAAAAACACGTCCTATTCCATTATTCCAT…	D64118	327	2.73959e-136	0.91	1	402	0	0	0	0	0	0	0	0	0	0	0	0	0	0	0	0	1	0	0	0	0	0	0	0	0	0	0	0
S1196_0148	Ascomycota	Fungi_other	CCCCGTGTTGAGTCAAATTAAGCCGCAGGCTCCACTCCTGGTGGTGCCCTTCCGTCAATTCCTTTAAGTTTCAGCCTTGCGACCATACTCCCCCCAGAACCCAAAAACTTTGATTTCTCGTAAGGTGCTGAACATGTTATTAAGAAAAAACAACGTCCAATCCCTAGTCGGCATAGTTTATGGTTAAGACTACGACGGTATCTGATCATCTTCGATCCCCTAACTTTCGTTCTTGATTAATGAAAACCTGATTGACAAATGCTTTCGCAGTAGTTTGTCTTGAAGAAATCCAAGAATTTCACCTCTGACTCTTCAATACAGATGCCCCCTACGGTTCCTCTTAATCATTACGATGGTCCTAGAAACCAACAAAATAGAACCAAACG	FJ381687	329	3.38972e-137	0.93	1	386	0	0	0	0	0	0	0	0	0	0	0	0	0	2	0	0	0	0	0	0	0	0	0	0	0	0	0	0
S1196_0149	Cryptomycota	Fungi_other	TCCCGTGTTGAGTCAAATTAAGCCGCAGGCTCCACTCCTGGTGGTGCCCTTCCGTCAATTCCTTTAAGTTTCGGACTTGCGACTATACTCCCCCCAGAACCCAAAAACTTTGATTTCTCTCAAGGTGCTGATGAAGTCAGAAAAGACTTTCACCAATCCCTAGTCGGCATAGTTTATGGTTAAGACTACGACGGTATCTGATCGTCTTCGATCCCCTAACTTTCGTTCTTGATTAATGAAAACATCCTTGGCAAATGCTTTCGCAGTAGTTAGTCTTCAGGAAATCCAAGAATTTCACCTCTAGCTCCTGAATACTAATGCCCCCAACTGTCCCTATTCATCATGATATTGGTCCTTAAAACCAACAAAATAGAACCAAAG	AF372713	322	4.21188e-134	0.92	1	381	0	0	0	0	0	0	0	0	0	0	0	0	0	0	0	0	0	0	0	0	0	0	2	0	0	0	0	0
S1196_0151	Ascomycota	Fungi_other	CCCCGTGTTGAGTCAAATTAAGCCGCAGGCTCCACGCCTGGTGGTGCCCTTCCGTCAATTTCTTTAAGTTTCAGCCTTGCGACCATACTCCCCCCAGAACCCAAAAACTTTGATTTCTCACAAGGCGCCGAGTGGGTCATCAAGAGAGCACCACCCGATCCCTAGTTGGCATAGTTTACAGTTAAGACTACGACGGTATCTGATCGTCTTCGATCCCCTAACTTTCGTTCGCTGACTAATGAAAACGTCTTTGGCAAATGCTTTCGCAGTGGTTAGTCTTCAGCCAATCCAAGAATTTCACCTCTGACGGCCAAATACTGATGCCCCCAACCATCCCTATTAATCATTACAACAGTTCTAGAAACCAACAAAATAGAACTGCATG	GU479750	321	1.18224e-133	0.91	1	383	0	0	0	0	0	3	0	0	0	0	0	0	0	0	0	0	0	0	0	0	0	0	0	0	0	0	0	0
S1196_0155	Ascomycota	Dothideomycetes	CCCCGTGTTGAGTCAAATTAAGCCGCAGGCTCCACGCCATGGTGGTGAACTTCCGTCAATTTCTTTAAGTTTCATTCTTGCGAACATACTCCCCCCAGAACCCAAACACTTTGATTTCTCGTAAGGTGCCGAGCGGGTCACATTAGAAACACCGCCCGATCCCTAGTCGGCATAGTTTACGGTTAAGACTACGACGGTATCTGATCGTCTTCGATCCCCTAACTTTCGTTCACTGATTAATGAAAACATCCTTGGCAAATGCTTTCGCAGTAGTTAGTCTTCGATAAATCCAAGAATTTCACCTCTGACTATCGAATACTGATGCCCCCGACTGTCCCTATTAATCATTACGGCGGTCCTAGAAACCAACAAAATAGGACCGCGACG	U42480	359	1.74603e-150	0.97	1	383	0	0	0	0	3	0	0	0	0	0	0	0	0	0	0	0	0	0	0	0	0	0	0	0	0	0	0	0
S1196_0156	Basidiomycota	Agaricomycetes	CCCCGTGTTGAGTCAAATTAAGCCGCAGGCTCCACACCTGGTGGTGCCCTTCCGTCAATTCCTTTAAGTTTCAGCCTTGCGACCATACTCCCCCCAGAACCCAAAGACTTTGATTTCTCATAAGGTGCCAAGCGATACATAATAATTGAGATTGCCCAATCCCTAGTCAGCATAGTTTACTGTTAAGACTACAATGGTATCTAATCGTTTTTGATCCCCTAACCTTTGTTCTTGATTAATGAAAACATCCTTGGCAAATGCTTTCACAATAGTTGGTCTTGAGTCAATCCAAGAATTTCACCTCTAGCAACTCAATACCAATGCCCCCAACTATCCCTATTAATCATTATGACGACTCTAGAAACCAACAAAATAGAACCACACATCCTATTTTATTAT…	HQ728539	373	1.15626e-156	0.96	1	405	0	0	0	0	0	0	0	0	0	0	0	0	0	0	0	0	0	0	0	0	0	4	0	0	0	0	0	0
S1196_0157	Chytridiomycota	Chytridiomycetes	CCCCGTGTTGAGTCAAATTAAGCCGCAGGCTCCACTCCTGGTGGTGCCCTTCCGTCAATTCCTTTAAGTTTCAGCCTTGCGACCATACTCCCCCCAGAACCCAAAAACTTTGATTTCTCATAAGGTGCCAAAGAGGTCATTAAAAAATCCTCTCTGATCCCTAGTCGGCATAGTTTATGGTTAAGACTACGACGGTATCTGATCGTCTTCGATCCCCTAACTTTCGTTCTTGATTAATGAAAACATCCTTGGCAAATGCTTTCGCAGAAGTTAGTCTTTCATAAATCCAAGAATTTCACCTCTGACAATTAAATACTAATGCCCCCAACTGTCCCTATTAATCATTACTTCGGTCTTGAAACCAACGAAATAAGACCAAAG	HQ901772	352	2.16304e-147	0.96	2	381	0	0	0	0	0	0	0	0	0	0	0	5	0	2	0	0	0	0	0	0	0	0	0	0	0	0	0	0
S1196_0158	Ascomycota	Sordariomycetes	CCCCGTGTTGAGTCAAATTAAGCCGCAGGCTCCACTCCTGGTGGTGCCCTTCCGTCAATTTCTTTAAGTTTCAGCCTTGCGACCATACTCCCCCCGGAACCCAAAAACTTGTACTTTCGCGTAAGGTGCCGAACGGGTCAAAAGATAACACCGTCCGATCCCTAGTTGGCATAGTTTATGGTTAAGACTACGACGGTATCTGATCGTCTTCGATCCCCTAACTTTCGTTCCTGATTAATGAAAACATCCTTGGCAAATGCTTTCGCAGTAGTTAGTCTTCAGCAAATCCAAGAATTTCACCTCTGACAGCTGAATACTGATGCCCCCGACTGTCCCTATTAATCATTACGGCGGTCCTAGAAACCAACAAAATAGAACCGCACG	DQ470998	368	1.7837e-154	0.97	1	384	2	17	7	2	0	3	0	0	0	4	16	18	2	6	0	3	0	0	0	2	1	12	0	19	0	1	0	0
S1196_0159	Chytridiomycota	Chytridiomycetes	CCCCGTGTTGAGTCAAATTAAGCCGCAGGCTCCACTCCTGGTGGTGCCCTTCCGTCAATTCCTTTAAGTTTCAGCCTTGCGACCATACTCCCCCCGGAACCCAAAAACTTTGATTTCTCTCAAGGTGCTGAACGCGTCTTCAAACAACATCGTCCAATCCCTAGTCGGCATAGTTTATGGTTAAGACTACGACGGTATCTGATCGTCTTTGATCCCCTAACTTTCGTTCTTGATTAATGAAAACATCCTTGGCAAATGCTTTCGCAGAAGTTAGTCTTTCATAAATCCAAGAATTTCACCTCTGATAATTAAATACTAATGCCCCCAACTATCCCTATTAATCATTACTTCGGTCCTAGAAACCAACAAAATAGAACCAAAGTCCTATTCCATTATTCC…	JN020240	380	9.16628e-160	0.97	1	405	0	0	0	0	0	0	0	0	0	0	0	0	0	0	0	0	0	0	3	0	0	0	0	0	0	0	0	0
S1196_0160	Basidiomycota	Fungi_other	CCCCGTGTTGAGTCAAATTAAGCCGCAGGCTCCACACCTGGTGGTGCCCTTCCGTCAATTCCTTTAAGTTTCAGCCTTGCGACCATACTCCCCCCAGAACCCAAAGACTTTGATTTCTCGTAAGGTGCCGAATGACTCATCATATTCTGAGGTCGCCCGATTGCTAGTCGGCATAGTTTATGGTTAAGACTACGACGGTATCTAATCGTCTTCGATCCCCTAACTTTCGTTCTTGATTAATGAAAACATCCTTGGCAAATGCTTTCGCAGTAGTTAGTCTTCCGAAAATCCAAGAATTTCACCTCTGACAACGGAATACTAATGCCCCCAACTGTCCCTATTGATCATTACGGAGCTCCAGAAAACCAACAAAATAGGAGCCCACG	AF334913	326	7.22944e-136	0.93	1	386	0	0	0	0	0	0	0	0	0	0	2	0	0	9	0	0	0	0	0	0	0	0	0	0	0	0	0	0
S1196_0163	Ascomycota	Lecanoromycetes	TCCCGTGTTGAGTCAAATTAAGCCGCAGGCTCCACGCCTTGTGGTGCCCTTCCGTCAATTGCTTTAAGTTTCAATCTTGCGACCGTACTCCCCCCGGAACCCAAACGCTTTGATTTCTCACAAGGTGCCGAACGGGTCAAAAATGAAACACCGTCCGATCCCTAGCTGGCATAGTTTATGGTTAAGACTACGACGGTATCTGATCGTCTTCGATCCCCTAACTTTCGTTCACTGATTAATGAAAACATCCTTGGCAAATGCTTTCGCAGTAGTTAGTCTTGAATAAATCCAAGAATTTCACCTCTGACAATTCAATACTGATGCCCCCGACTATCCCTATTAATCATTACGGCGGTCCTAGAAACCAACAAAATAGAACCAACG	EF053587	371	8.36334e-156	0.98	2	384	0	0	0	0	0	0	0	0	0	0	3	0	0	0	0	0	1	0	0	0	2	0	0	0	0	0	0	0
S1196_0164	Chytridiomycota	Chytridiomycetes	TCCCGTGTTGAGTCAAATTAAGCCGCAGGCTCCACTCCTGGTGGTGCCCTTCCGTCAATTCCTTTAAGTTTCAGCCTTGCGACCATACTCCCCCCGGAACCCAAAAACTTTGATTTCTCTAAAGGTGCCGAGCGCGTCATGAAAATAACATCGCCCGATCCCTAGTCGGCATAGTTTATGGTTAAGACTACGACGGTATCTGATCGTCTTCGATCCCCTAACTTTCGTTCTTGATTAATGAAAACATCCTTGGCAAATGCTTTCGCAGAAGTTGGTCTTCAATAAATCCAAGAATTTCACCTCTGACAATTGAATACCAATGCCCCCAACTGTCCCTATTAATCATTACCTCGGTCCTAGAAACCAACAAAATAGAACCAAAG	JN020240	354	2.82967e-148	0.96	2	383	0	1	0	0	0	6	0	0	0	0	2	2	0	3	0	0	1	0	1	0	0	0	0	0	0	1	2	0
S1196_0165		Fungi_other	CCCGCAATTTGAAGATGTCGCCTGCCTAAGCAGACTAGCATTTAACTTTAGAGGCTTGTAACAACCTCAAGGCTAACCACCTCACCCTTTCGGGCTGCTTTTCAGTGCAGAGTTGCTGCGAACAACTATGAGTTTACACCTGGTGGTGCCCTTCCGTCAATTCCTTTAAGTTTCAGCCTTGCGACCATACTCCCCCCAGAACCCAAAGACTTTGATTT	DQ457646	170	4.64218e-67	0.9	1	218	0	0	0	0	0	0	0	0	0	0	0	0	0	5	0	0	0	0	0	0	0	0	0	0	0	0	0	0
S1196_0166	Ascomycota	Eurotiomycetes	CCCCGTGTTGCGGCTAAAGTTTACGCCTTGTGGTGCCCTTCCGTCAATTTCTTTAAGTTTCAGCCTTGCGACCATACTCCCCCCAGAACCCAAAAACTTTGATTTCTCGTAAGGTGCCGAACGGGTCATCATAAAAACACCGTCCGATCCCTAGTCGGCATAGTTTATGGTTAAGACTACGACGGTATCTGATCGTCTTCGATCCCCTAACTTTCGTTCCCTGATTAATGAAAACATCCTTGGCGAATGCTTTCGCAGTAGTTAGTCTTCAGCAAATCCAAGAATTTCACCTCTGACAGCCGAATACTGACGCCCCCGACCATCCCTATTAATCATTACGGCGGTCCTAGAAACCAACAAAATAGAACCACACGTCCTATTCTATTATTCCATGCTAT	FJ358340	369	6.70314e-155	0.99	23	397	0	0	0	0	1	6	0	0	0	0	0	0	0	0	0	0	0	0	0	0	0	0	0	0	0	0	0	0
S1196_0167	Cryptomycota	Cryptomycota	TCCCGTGTTGAGTCAAATTAAGCCGCAGGCTCCACTCCTGGTGGTGCCCTTCCGTCAATTCCTTTAAGTTTCAGCCTTGCGACCATACTCCCCCCAGAACCCAAACACTTTGATTTCTCTCATGGTCCCGATACTGTCAATCCTGACTCGTACCGATCCCTAGTCGGCATAGTTTATGGTTAAGACTACGACGGTATCTGATCGTCTTCGATCCCCTAACTTTCGTTCTTGATCAATGAAAACATCCTTGGCAAATGCTTTCGCTCTAGTTAGTCTTCCGTAAATCCAAGAATTTCACCTCTGACTACTGAATACTAATGCCCCCAACTATCCCTATTAATCATTACTTTGGTCCTCAAACCAACAAAATAGAACCAAAA	AF372713	328	9.23148e-137	0.93	1	379	0	0	0	0	0	0	0	0	0	0	0	0	0	0	0	0	0	0	6	0	0	0	0	0	0	0	0	0
S1196_0170	Basidiomycota	Agaricomycetes	CCCCGTGTTGAGTCAAATTAAGCCGCAGGCTCCACACCTGGTGGTGCCCTTCCGTCAATTCCTTTAAGTTTCAGCCTTGCGACCATACTCCCCCCAGAACCCAAAGACTTTGATTTCTCGTAAGGTTCTGAATGACACATCAAATTTGAGGTCATCCAATCCCTAGTCGGCATAGTTTACTGTTAAGACTACAACGGTATCTGATCGTTTTCGATCCCCTAACCTTCGTTCTTGATTAATGAAAACATCCTTGGCAAATGCTTTCGCAATAGTTGGTCTTGAGTCAATCCAAGAATTTCACCTCTAGCGACTCAATACCAATGCCCCCAACTATCCCTATTAATCATTACGGCGACTCTAGAAACCAACAAAATAGAACCGCACG	GU187620	373	1.09075e-156	0.98	1	385	125	254	273	385	20	68	58	2	0	87	63	15	45	1	1	8	93	15	0	1	21	279	2	420	3	2	47	65
S1196_0171	Ascomycota	Sordariomycetes	CCCCGTGTTGAGTCAAATTAAGCCGCAGGCTCCACTCCTGGTGGTGCCCTTCCGTCAATTCCTTTAAGTTTCAGCCTTGCGACCATACTCCCCCCGGAGCCTAAAAACTTTGATTTCTCGTAAGGTGCTAGATGGGTGAGAAAAATAATACACCATCCAATCCCTAGTCGGCATAGTTTATGGTTAAGACTACGACGGTATCTGATCGTCTTCGATCCCCTAACTTTCGTTCCTGATTAATGAAAACATCCTTGGCAAATGCTTTCGCAGTAGTTAGTCTTCAATAAATCCAAGAATTTCACCTCTGACAATTGAATACTGATGCCCCCGACTGTCCCTATTAATCATTACGGCGGTCCTAGAAACCAACAAAATAGAACCACACG	AF279399	349	4.68335e-146	0.95	1	386	1	0	0	0	0	0	0	0	0	0	0	0	0	0	0	0	0	0	0	0	0	0	0	0	0	0	0	1
S1196_0172	Basidiomycota	Fungi_other	CCCCGTGTTGAGTCAAATTAAGCCGCAGGCTCTACACCTAGTGATACTCTTCTGTTAATTCCTTTAAGTTTCAGCCTTGTGACTATACTCCCCCCAGAACCCAAAGACTTTGATTTCTCGTAAGGTGCTGAGCAACACATCAAAATTAAGGTTGCCTAATCCCTAGTCAGCATAGTTTACTGTTAAGACTACAACGGTATCTGATTGTTTTCGATCCCCTAACCTTTGTTCTTGATTAATAAAAACATCCATGGCAAATACTTTCGCAGTTGTTGGTCTTGAGTTAATCCAAGAATTTCACCTCTAGCAACTCAATACTAATGCCCCTAACTATCCCTATTAATTATTACAGCAACTCTAGAAACTAACAAAATAGAACCACATGTCCTATTCCATTAT…	AF287833	344	8.1877e-144	0.92	1	408	0	0	0	0	4	1	0	0	0	0	0	0	0	0	0	0	0	0	0	0	0	0	0	0	0	0	0	0
S1196_0177	Ascomycota	Archaeorhizomycetes	CCCCGTGTTGAGTCAAATTAAGCCGCAGGCTCCACTCCTGGTGGTGCCCTTCCGTCAATTCCTTTAAGTTTCAGCCTTGCGACCATACTCCCCCCAGAACCCAAAGACTTTGATTTCTCATAAGGTGCCGGACGAGTCATTTCAAACTGCGCCCGATCCCTAGTCGGCATAGTTTATGGTTAAGACTACGACGGTATCTAATCATCTTCGATCCCCTAACTTTCGTTCTTGATTAATGAAAACATCCTTGGCAAATGCTTTCGCAGTAGTTAGTCTTCAATAAATCCAAGAATTTCACCTCTGACAATTGAATACTAATGCCCCCAACTATCCCTATTAATCATTACGGCGGTCTTAGAAACCAACAAAATAAGACTGACG	AY124370	341	1.6138e-142	0.95	1	372	219	31	0	4	155	45	11	0	0	0	41	167	0	11	11	0	3	0	5	0	1	10	0	2	0	45	7	1
S1196_0180	Chytridiomycota	Chytridiomycetes	CCCCGTGTTGAGTCAAATTAAGCCGCACAATCCACGCCTGGTAGTGCCCTTCCGTCAATTCCTTTAAGTTTCAGCCTTGCGACCATACTCCCCCCAGAACCCAAAAACTTTGATTTCTCGTATGGTGCCGAACGCGTCAATAAGAAAAACAACGTCCGATCCCAAGTCGGCATAGTTTATGGTTAAGACTACGACGGTATCTGATCGTCTTCGATCCCCTAACTTTCGTTCTTGATTAATGAAAACATCCTTGGCAAATGCTTTCGCAGAAGTTAGTCTTTCATAAATCCAAGAATTTCACCTCTGACAATGAAATACTAATGCCCCCAACTATCCCTATTAATCATTACTTCGGTCCTAGAAACCAACAAAATAGAACCAAAGTCCTATTTTATTATT…	JN020240	375	1.51199e-157	0.96	1	407	0	0	0	0	0	0	0	0	0	0	0	0	0	2	0	0	0	0	0	0	0	0	0	0	0	0	0	0
S1196_0181	Ascomycota	Orbiliomycetes	CCCCGTGTTGAGTCAAATTAAGCCGCAGGCTCCACATCTGGTGGTGCCCTTCCGTCAATTCCTTTAAGTTTCAGCCTTGCGACCATACTCCCCCCAGAACCCAAAGACTTTGATTTCTCCTAAGGTGCCGAGCGGGTCATAAGTTGAACTCCGCCCGATCCCTAGTCGGCATAGTTTATGGTTAAGACTACGACGGTATCTGATCGTCTTCGATCCCCTAACTTTCGTTCACTGATTAATGAAAACATCCTTGGCAAATGCTTTCGCAGTAGTTAGTCTTCAATAAATCCAAGAATTTCACCTCTGACAATTGAATACTGATGCCCCCGACTATCCCTATTAATCATTACGGTGGCTCTAGAAACCAACAAAATAGAACCCCCG	DQ471000	378	6.63005e-159	0.99	1	384	0	4	2	6	3	17	1	0	0	3	1	1	7	1	0	1	0	0	0	0	0	0	0	0	0	0	3	1
S1196_0186	Basidiomycota	Agaricomycetes	CCCGCAATTTGAAGGTGTCGCCCAGCAGAGTCAATTGCTAGACTAGCATTTAGATTTATGAACGATGAATCGTTCAAAGGCTTGAACCACCTCACCCGTTAAGGCTGCTTTTCGGTGCAGAGTTACTGCGGCAAAACAGTAAGAATGTTTACACCTGGTGGTGCCCTTCCGTCAATTCCTTTAAGTTTCAGCCTTGCGACCATACTCCCCCCAGAACCCAAAGACTTTGATTTCTCGTAAGGTGCCGAGCAACACATAAAAATTGAGGTTGCCCGATCCCTAGTCGGCATAGTTTACTGTTAAGACTACAACGGTATCTGATCGTTTTCGATCCCCTAACCTTCGTTCTTGATTAATGAAAACATCCTTGGCAAATGCTTTCGCAGTAGTCGGTCTTGA…	DQ457696	415	3.6458e-175	0.95	34	502	0	0	0	0	0	0	0	0	0	0	0	0	5	0	0	0	0	0	0	0	0	0	0	0	0	0	0	0
S1196_0187	Ascomycota	Eurotiomycetes	CCCCGAACAGTTTGAGGGTGTCGCCCCGGGGAGATTACCTCCCGCGGGACTAGCATTTAAGGCCACACCACCTCACCTTTACAGGCTGCTTTTAGGCGCAGAGTTAACTACGGCTTAAGTAGAAAACACACGCGTTTACGCCTGGTGGTGCCCTTCCGTCAATTTCTTTAAGTTTCAGCCTTGCGACCATACTCCCCCCCGAGCCCAAAAACTTTGATTTCTCGTAAGGTGCCGAACGGGGCATAAAAAAACCACCGTCCGATCCCTAGTCGGCATAGTTTATGGTTAAGACTACGACGGTATCTGATCGTCTTCGATCCCCTAACTTTCGTTCACTGATTAATGAAAACATCCTCGGCGAATGCTTTCGCAGTAGTTAGTCTTCAATAAATCCAAGAA…	EF053568	418	1.73989e-176	0.95	48	510	0	0	0	0	0	0	0	0	0	0	0	4	0	0	0	0	0	0	0	0	0	0	0	0	0	0	0	0
S1196_0189	Basidiomycota	Microbotryomycetes	CCCCGTGTTGAGTCAAATTAAGCCGCAGGCTCCACACCTGGTGGTGCCCTTCCGTCAATTCCTTTAAGTTTCAGCCTTGCGACCATACTCCCCCCCGAACCTCATTTAAAGATTTCTCTTCGGGTGCTAACTTGGTCATTGAAAATCCCAAGCTAATCCCCAATTGGCATAGTTTACAGAAGAGACTACAACGGTATCTAATCGTTTTCGATCCCCCTTCCTTCGTTCTTGATCAATGAAAACATCCTTGGCAAATGCTTTCGCAGTAGTTTGTCTTCCGGCAATCCAAGAATTTCGCCTCTGACGACGGAATACAAATGCCCCCAACTATCCCTATTAATCATTACGGCGATCTCAGAAACCAACAAAATGGGACCGCACG	U77063	368	1.77295e-154	0.98	1	382	10	18	0	0	0	0	0	0	0	0	14	0	0	3	0	2	1	20	0	2	2	1	0	0	0	0	0	0
S1196_0191	Ascomycota	Eurotiomycetes	CCCCGTTTTAGTACGAATAGCAATATTTAAAGGATTACTTTTTAGGCGCAGAGTTATTAAAGTTAACGCCTTGTGGTGCCCTTCCGTCAATTTCTTTAAGTTTCAGCCTTGCGACCATACTCCCCCCAGAACCCATACACTTTGATTTCTCGTAAGGTGCCGAACGGGTCATATAAAAAACACCGTCCGATCCCTAGTCGGCATAGTTTATGGTTAAGACTACGACGGTATCTGATCGTCTTCGATCCCCTAACTTTCGTTCACTGATTAATGAAAACATCCTTGGCGAATGCTTTCGCAGTAGTTAGTCTTCAATAAATCCAAGAATTTCACCTCTGACAATTGAATACTGACGCCCCCGACTATCCCTATTAATCATTACAGCGGTCCTAGAAACCA…	FJ358326	351	6.63667e-147	1	66	416	0	0	0	0	0	0	0	0	0	0	0	0	0	2	0	0	1	0	0	0	0	0	0	0	0	0	0	0
S1196_0194	Glomeromycota	Glomeromycetes	CCCCATGTTGAGTCAAATTAAGCCGCAGGCTCCACTCCTGGTGGTGCCCTTCCATCAATTCCTTTAAGTTTCAGCCTTGCGACCATACTCCCCCCAGAACCCAAAAACTTTGATTTCTCATAAGGTGCCAAACAAGTCAAAATACCCTTGTCTGATCCCTAGTCGGCATAGTTTACAGTTAAGACTACGACGGTCTCTGTCCGTCTTCGATCCCCTAACTTTCGTTCTTGATTAATGAAAACATCCTTGGCAAATGCTTTCGCAGAGGTTAGTCTTTCATAAATCCAAGAATTTCACCTCTGACAATTAAATTCTAATGCCCCCAACTATCCCTATTAATCATTACTTCAGTCCTAGAAACCAACAAAATAGAACCAAAG	AF229771	352	2.15647e-147	0.96	1	380	0	0	0	0	0	0	0	0	0	0	0	0	0	2	0	0	0	0	0	0	0	0	0	0	0	0	0	0
S1196_0199	Chytridiomycota	Chytridiomycetes	CCCCGTGTTGAGTCAAATTAAGCCGCAGGCTCCACTTCTGGTGGTGCCCTTCCGTCAATTCCTTTAAGTTTCAGCCTTGCGACCATACTCCCCCCGGAACCTAAAAACTTTGATTTCTCTCAAGGTGCTGAACGAGTCATAAAATAACGACGTCCAATCCCTAGTCGGCATAGTTTATGGTTAAGACTACGACGGTATCTGATCGTCTTCGATCCCCTAACTTTCGTTCTTGATTAATGAAAACATCCTTGGCAAATGCTTTCGCAGTAGTTAGTCTTTTCGCAATCCAAGAATTTCACCTCTAGCGCGAAAATACTAATGCCCCCAACTGTCCCTATTAATCATTACTCTGGTCTTGAAAACCAACAAAATAAGACCAAAGTCCTATTCTATTATTCC…	AF372720	352	2.31426e-147	0.94	1	404	0	4	0	0	0	0	0	0	0	0	0	0	0	0	0	0	0	0	0	0	0	0	0	2	0	0	0	0
S1196_0201	Ascomycota	Sordariomycetes	CCCCGTGTTGAGTCAAATTAAGCCGCAGGCTCCACTCCTGGTGGTGCCCTTCCGTCAATTTCTTTAAGTTTCAGTCTTGCGACCATACTCCCCCAGGAGCCCACACATTTTGATTTGTCGTAAGGTGCCGAGCGAGTCAAAGAATAACGCCGCCCGATCCCTAATCGGCATAGTTTATGGTTAAGACTACAACGGTATCTGATCGTTTTCGATCCCCTAACTTTCGTTCTTGATTAATGAAAACATCCTTGGCGAATGCTTTCGCAGTAGTTAGTCTTCAGTCAATCCAAGAATTTCACCTCTGACGACTGAATACTGACGCCCCCGACTGTCCCTATTAATCATTACGGCGGTCCGAGAAACCAACAAAATAGAACCACACG	AY545725	347	3.56943e-145	0.95	1	383	0	4	0	2	0	0	0	0	0	0	1	0	2	12	1	1	4	0	0	0	0	0	0	1	0	1	0	0
S1196_0202	Basidiomycota	Agaricomycetes	CCCCGTGTTGAGTCAAATTAAGCCACAGGCTCCACTCCTGGTGGTGCCCTTCCATCAATTCCTTTAAGTTTCAGCCTTGCAATCATACTCCCCCCAGAACCCAAAGACTTTGATTTCTTGTAAGGTGCCGAACGACACATAAGATTGAGGTTGTCCGATCCCTAGTTGGCATAGTTTACTGTTAAGACTACAACGGTATCTGATCGTTTTCGATCCCCTAACCTTCGTTCTTGATTAATGAAAACATCCTTGGCAAATGCTTTCGCAATAGTTTGTCTTGCATAAATCCAAGAATTTCACCTCTAGCAACACAATACAAATGCCCCCAACTATCCCTATTAATCATTACAGTGACTCTAGAAACCAACAAAATAGAACCACACG	DQ457626	356	3.6905e-149	0.96	1	384	0	0	0	0	0	0	0	0	0	0	0	0	0	0	2	0	0	0	0	0	0	0	0	0	0	0	0	0
S1196_0203	Ascomycota	Eurotiomycetes	CCCCGTGTTGAGTCAAATTAAGCCGCAGGCTCCACTCCTGGTGGTGCCCTTCCGTCAATTTCTTTAAGTTTCAGCCTTGCGACCATACTCCCCCCAGAACCCAAAAACTTTGATTTCTCGTAAGGTGCTGAACGGGTCATCATAAAAACACCGTCCAATCCCTAGTCGGCATAGTTTATGGTTAAGACTACGACGGTATCTGATCGTCTTCGATCCCCTAACTTTCGTTCCCTGATTAATGAAAACGTCCTTGGCGGATGCTTTCGCAGTAGTTAGTCTTCAGCTAATCCAAGAATTTCACCTCTGACAGCCGAATACTGACGCCCCCGACCATCCCTATTAATCATTACGGCGGTCCTAGAAACCAACAAAATAGAACCACACG	FJ358340	369	6.45129e-155	0.97	1	385	7	2	6	17	11	33	2	211	1	1	18	2	2	1	91	38	1	2	0	204	6	5	38	10	122	23	3	13
S1196_0204	Ascomycota	Dothideomycetes	CCCCGTGTTGAGTCAAATTAAGCCGCAGGCTCCACGCCTGGTGGTGCCCTTCCGTCAATTTCTTTAAGTTTCAGCCTTGCAACTATACTCCCCCCTATTAAAAAAGTTAGTAAACTGCAGAAACGGAATTAAATGTGGACTTACCAGAACCCAAAAACTTTGATTTCTCGTAATGTGCCGAAGGGGTCAACAAAAAAACACCCTCCGATCCATAGTCGGCATAGTTTACGGTGAAGACTACGACGGTATCTACAATTTACGTTAGTAACCTGGATTATTGATGGCGATGGGAAGTTTGGAAGCTCTTACCTGATCGTCTTCGATCCCCTCACTTTCGTTCACTGATTAATGAAAACATCCTTGGCGAATGCTTTCGCAGTAGTTCGTCTTCGAAAAATC…	GU561841	261	6.23794e-107	0.86	144	517	0	0	0	0	0	0	0	0	0	0	0	0	0	0	0	0	0	2	0	0	0	0	0	0	0	0	0	0
S1196_0207	Ascomycota	Fungi_other	CCCCGTGTTGAGTCAAATTAAGCCGCAGGCTCCACGCCTGGTGGTGCCCTTCCGTCAATTTCTTTAAGTTTCAGCCTTGCGACCATACTCTCCCCAGAACCCAAAGACTTTGATTTCTCGAAAGGTGCCGAGCGGGTCAAAGTGAAAACACCGCCCGATCCCTAGTCGGCATAGTTTATGGTTAAGACTACGACGGTATCTGATCGTCTTCGATCCCCTAACTTTCGTTCACTGATTAATGAAAACATCCTTGGCAAATGCTTTCGCAGTAGTCAGTCTTCAATCGGTCCAAGAATTTCACCTCTCACGATTGAATACTAATGCCCCCGACAGTCCCTATTAATCATTACGACCCCCCCGGAAACCAACAAAATAGGAGGGCCG	AF515360	338	3.47322e-141	0.94	1	378	4	70	3	4	9	1	17	2	0	0	12	13	18	0	1	8	1	0	1	0	2	6	7	52	3	1	8	0
S1196_0211	Ascomycota	Pezizomycetes	CCCCATGTTGAGTCAAATTAAGCCGCAGGCTCTACTCCTGGTGGTACCCTTCCGTCAATTCCTTTAAGTTTCAGCCTTGCGACCATACTCTCCCCAGAACCCAAAGACTTTGATTTCTCGTAAGGTGCCGAATGGGTCAAAAAAGAAGCCCGTCCGATCCCTAGTCAGCATAGTTTATGGTTAAGACTACAACGGTATCTGATTATCTTCGATCCCCTAACTTTCGTTCACTGATTAATGAAAACATCCTTGGCAAATGCTTTCGCAGTAGTTAGTCTTCAATTAATCCAAGAATTTCACCTCTGACAATTGAATACTGATGCCCCCGACTATCCCTATTAATCATTACGGCGGTCCTAGAAACCAACAAAATAGAACCACACG	AF515326	364	1.05498e-152	0.97	1	384	0	0	0	0	0	0	0	0	0	0	0	0	0	0	5	0	0	0	0	0	0	0	0	0	0	0	0	0
S1196_0213	Basidiomycota	Agaricomycetes	CCCCGTGTTGAGTCAAATTAAGCCGCAGGCTCCACACCTGGTGGTGCCCTTCCGTCAATTCCTTTAAGTTTCAGCCTTGCGACCATACTCCCCCCAGAACCCAAAGACTTTGATTTCTCGTAAGGTGCCGAGCAACACATCATAATTGAGGTTGCCCGATCCCTAGTCGGCATAGTTTACTGTTAAGACTACAACGGTATCTGATCGTTTTCGATCCCCTAACCTTCGTTCTTGATTAATGAAAACATCCTTGGCAAATGCTTTCGCAATAGTTGGTCTTGAGTCAATCCAAGAATTTCACCTCTAGCGACCCAGTACCAATGCCCCCAACTATCCCTATTAATCATTACGGCGACTCTAGAAACCAACAAAATAGAACCGCACG	KJ137260	381	3.11804e-160	0.99	1	385	3766	1260	810	978	647	1868	605	67	0	965	1050	821	1814	3530	290	2006	5099	8295	23940	325	18477	2879	398	510	320	2639	183	264
S1196_0218	Basidiomycota	Agaricomycetes	CCCCGTGTTGAGTCAAATTAAGCCGCAGGCTCCACACCTGGTGGTGCCCTTCCGTCAATTCCTTTAAGTTTCAGCCTTGCGACCATACTCCCCCCAGAACCCAAAGACTTTGATTTCTCGTAAGGTGCCGAACCACACATCAATAAAGAGGTGGCCCGATCCCTAGTCGGCATCGTTTACTGTTAGGACTACAACGGTATCTAATCGTTTTCGATCCCCTAACCTTCGTTCTTGATTAATGAAAACGTCCTTGGCAAATGCTTTCGCAATAGTTCATCTTGAGTGAATCCAAGAATTTCACCTCTAGCCACTCAATATGAATGCCCCCGACCGTCCCTATTAATCATTACGGCGACTCTAGAAACCAACAAAATAGAACCGCAG	DQ444856	345	2.7534e-144	0.95	1	383	0	0	0	0	0	0	0	0	0	0	0	6	0	1	0	0	10	0	1	0	0	0	0	0	0	0	0	0
S1196_0220	Ascomycota	Eurotiomycetes	CCCCGTGTGTGGCCGGCCACGCGGGCCGACTAGCATTTACTGTTTAGAGGATCACCACATCACCCTTTCGGGCTGCTGTTCGGCGCAGAGTCTACTGCGGCTAGCGGTAAAGGTTTACGCCTTGTGGTGCCCTTCCGTCAATTTCTTTAAGTTTCAGCCTTGCGACCATACTCCCCCCAGAACCCAAAAACTTTGATTTCTCGTAAGGTGCCGAACGGGTCATCATAGAATCCCGTCCGATCCCTAGTCGGCATAGTTTATGGTTAAGACTACGACGGTATCTGATCGTCTTCGATCCCCTAACTTTCGTTCCCTGATTAATGAAAACATCCTTGGCGAATGCTTTCGCAGTAGTTAGTCTTCAGCAAATCCAAGAATTTCACCTCTGACAGCTGAATA…	AY526485	409	1.52907e-172	0.97	28	467	0	0	0	0	0	0	0	0	0	0	0	0	0	0	0	0	0	0	0	2	0	0	0	0	0	0	0	0
S1196_0223	Basidiomycota	Fungi_other	CCCTGTGTTGACTCAAATTAAGCCGCAGGCTCCACACCTGGTGGTGCTCTTCCGTCAATTCCTTTAAGTTTTAGCCTTGTGACCATACTCCCCCCAGAACCCAAAGACTTTGATTTCTCGTAAGGTGCCAAGCCAGTCAGAAATTAACATGGCCCGATCCGTAGTCGGCATAGTTTACTGTTAAGACTACAATGTTTTCTAATCGGTTTTGATCCCCTAACCTTCATCCTTGATCAATGAAAACGTCCTTGGCAATGTTTTCGCAGAAGTCAGTCTTCCATAAATCTAAGAATTTCATCTCTAGCAACAGAATACTAATGCCCCTGACCGTCCCTATTAATCATTACGGCGATCCTGGAAACCAACAAAATAGAACCGCATG	AF261665	335	7.3629e-140	0.94	1	380	0	3	0	0	0	0	0	0	0	0	0	0	0	0	0	0	0	0	0	0	0	0	0	0	0	0	0	0
S1196_0225	Ascomycota	Sordariomycetes	CCCCGTGTTGAGTCAAATTAAGCCGCAGGCTCCACCCCTGGTGGTGCCCTTCCGTCAATTTCTTTAAGTTTCAGCCTTGCGACCATACTCCCCCCAGAACCCAAAGACTTTGATTTCTCGCAAGGTGCCGAACGAGCCAAGTAAAAGCGTCGTCCGATCCCTAGTCGGCATAGTTTATGGTTAAGACTACGACGGTATCTGATCGTCTTCGATCCCCTAACTTTCGCTCCTGATTAATGAAAACATCCTTGACAAATGCTTTCGCAGTAGTTAGTCTTCAATTAATCCAAGAATTTCACCTCTGACAATTGAATACTGATGCCCCCGACTGTCCCTATTAATCATTACGGCGGTCCTAGAAACCAACAAAATAGAACCGCGCG	AF515370	361	2.24323e-151	0.97	1	383	0	2	0	0	0	0	1	0	0	0	2	0	1	2	0	3	1	0	0	2	0	0	1	8	1	1	2	0
S1196_0231	Chytridiomycota	Chytridiomycetes	CCCCGTGTTGAGTCAAATTAAGCCGCAGGCTCCACTCCTGGTGGTGCCCTTCCGTCAATTCCTTTAAGTTTCAGCCTTGCGACCATACTCCCCCCGGAACCCAAAGACTTATGGTTTCCCGCAAGGTGCTGGGGGAGTCATCCATATAAAATTTAACGTCTCCCAATCCCTGGTCGGCATAGTTTATGGTTAAGACTACGACGGTATCTGATCGTCTTCGATCCCCTAACTTTCGTTCTTGATTAATGAAAACATCCTTGGCAAATGCTTTCGCTGAAGTTAGTCTTTCATAAATCCAAGAATTTCACCTCTGACAATTAAATACTAATGCCCCCAACTATCCCTATTAATCATTACTTCGGTCACTATAAACCAACAAAATAGAACCAAAGTCCTATT…	HQ901733	353	8.62958e-148	0.94	2	416	0	0	0	0	0	0	0	0	0	0	0	0	2	0	0	0	0	0	0	0	0	0	0	0	0	0	0	0
S1196_0234	Ascomycota	Pezizomycetes	CCCCGTGTTGAGTCAAATTAAGCCGCAGGCTCCACTCCTGGTGGTGCCCTTCCGTCAATTCCTTTAAGTTTCAGCCTTGCGACCATACTCCCCCCAGAACCCAAAGACTTTGATTTCTCGTAAGGTGCCGAGCAAGTCAAATTATAACATCGCCCGATCCCTAGTCGGCATAGTTTATGGTTGAGACTACGACGGTATCTGATCGTCTTCGATCCCTCAACTTTCATTCCTGATTAATGAAAACATCCTTGGCAAATGCTTTCGCAGTAGTTCGTCTTCAATAAATCCAAGAATTTCACCTCTGACAATTGAATACGGATGCCCCCGACTATCCCTATTAATCATTACGGCGGTCCTAGAAACCAACAAAATAGAACCGCACG	U62014	373	1.0842e-156	0.98	1	383	0	0	0	2	1	5	0	0	0	0	5	0	0	1	0	0	0	0	0	0	0	6	0	2	0	0	0	2
S1196_0235	Basidiomycota	Tremellomycetes	CCCCATGTTGAGTCAAATTAAGCCACAGGCTCTACACCTGGTGGTGCCCTTCTGTCAATTCCTTGAAGTTTCAGCCTTGTGACCATACTCCCCCCAGAACCCAAAGACTTTGATTTCTTGTAAGGTGCCGAGCCAGTCAGAAATTAACGTGGCCTGATCCCTAGTCAGCATAGTTTACTATTAAGACTACAACAGTATCTAATCATTTTTGATCCCCTAACCTTTGTTCTTGATCAATGAAAACATCCTTGGCAAATGCTTTCACAGAAGTTAGTCTTCTGTAAATCTAAGAATTTCACCTCTAGCAACAGAATACTAATGCCCCCGACCGTCCCTATTAATCATTACAGCGATCCTAGAAACCAACAAAATAGAACCGCATGTCCTATTCCATTATTC…	AF261665	365	4.04481e-153	0.95	1	405	0	0	0	0	4	2	0	0	0	0	0	0	0	0	0	0	0	0	0	0	0	0	0	0	0	0	0	0
S1196_0237	Basidiomycota	Agaricomycetes	CCCCGTGTTGAGTCAAATTAAGCCGCAGGCTCCACTCCTGGTGGTGCCCTTCCATCAATTCCTTTAAGTTTCAGCCTTGCGACCATACTCCGCCCAGAACCCAAAGACTTTGATTTCTCGTAAGGTGCTGAGCGACACATAAAAGTGAGATCGCCCGATCCCTAGTCGGCATAGTTTACTGTTAAGACTACAATGGTATCTGATCGTTTTCGATCCCCTAACCTTCGTTCTTGATTAATGAAAACATCCTTGGCAAATGCTTTCACAGAAGTTAGTCTTCAGTAAATCCAAGAATTTCACCTCTAGCAACTGAATACTAATGCCCCCAACTATCCCTATTAATCATTACGGCGACTCTAGAAACCAACAAAATAGAACCACACG	EU215396	372	3.01578e-156	0.98	1	384	5	12	9	19	9	6	4	3	0	6	1	12	46	34	3	5	10	3	5	3	5	5	0	2	1	13	4	2
S1196_0238	Basidiomycota	Agaricomycetes	CCCCGTGTTGAGTCAAATTAAGCCGCAGGCTCCACTCCTGGTGGTGCCCTTCCGTCAATTCCTTTAAGTTTCAGCCTTGCGACCATACTCCCCCCAGAACCCAAAGACTTTGATTTCTCGTAAGGTGCCGAGGGACACATCAGATTGAGGTCCCCCGATCCCTAGTCGGCATAGTTTACTGTTAAGACTACAACGGTATCTGATCGTTTTCGAGCCCCTAACCTTCGTCCTTGATCAATGAAAACATCCTTGGCAAATGCTTTCGCAGTAGTTAGTCTTCGCGCAATCCAAGAATTTCACCTCTAGCGCGCGAATACCAATGCCCCCAACTGTCCCTATTAATCATTACGGCGACTCTAGAAACCAACAAAATAGAACCGCACG	AF518581	358	4.79871e-150	0.96	1	384	0	0	0	0	0	1	109	0	0	3	0	11	3	2	0	2	0	0	0	0	1	12	0	0	0	0	0	0
S1196_0240	Ascomycota	Pezizomycetes	CCCCGTGTTGAGTCAAATTAAGCCGCAGGCTCCACTCCTGGTGGTGCCCTTCCGTCAATTCCTTTAAGTTTCAGCCTTGCGACCATACTCCCCCCAGAACCCAAAGACTTTGATTTCTCGTAAGGTGCCGAACGACGCATGATATCGAGGTCGCCCGATCCCTAGTCGGCATAGTTTATGGTTGAGACTACGACGGTATCTGATCGTCTTCGATCCCTCAACTTTCGTTCCTGATTAATGAAAACATCCTTGGCAAATGCTTTCGCAGTAGTTCGTCTTCAATAAATCCAAGAATTTCACCTCTGACAATTGAATACGGATGCCCCCGACTATCCCTATTAATCATTACGGCGGTCCTAGAAACCAACAAAATAGAACCGCACG	U53386	364	1.05498e-152	0.97	1	384	0	1	3	56	2	3	2	2	0	1	6	2	4	3	2	8	0	0	0	3	1	13	0	9	0	6	0	9
S1196_0242	Chytridiomycota	Chytridiomycetes	CCCCGTGTTGAGTCAAATTAAGCCGCAGGCTCCACCCCTGGTGGTGCCCTTCCGTCAATTCCTTTAAGTTTCAGCCTTGCGACCATACTCCCCCCGGAACCCAAAAACTTTAATTTCTCATAAGGTGCCGATGGAGACATAAAAATAACATCCACCGATCCCTAGTCGGCATAGTTTATGGTTAAGACTACGACGGTATCTGATCGTCTTCGATCCCCTAACTTTCGTTCTTGATTAATGAAAACATCCTTGGCAAATGCTTTCGCAGTAGTTAGCCTTGAGCAAATCCAAGAATTTCACCTCTGACAGCTCAATACTAATGCCCCCAACTATCCCTATTAATCATTACTTCGGTCCTAGAAACCAACAAAATAGAACCAAAG	DQ643792	347	3.56943e-145	0.95	1	383	0	0	0	0	0	1	0	0	0	0	0	0	0	0	0	0	2	0	0	0	1	0	0	0	0	0	0	0
S1196_0243	Basidiomycota	Fungi_other	CCCCGTGTTGAGTCAAATTAAGCCGCAGGCTCCACACCTGGTGGTGCCCTTCCGTCAATTCCTTTAAGTTTCAGCCTTGCGACCATACTCCCCCCAGAACCCAAAGACTTGTGATTTCTCGCAAGGTCCCGAGCGACACATATTTTATTCAGTGGTCGCCCGATCCCTAGTCGGCATAGTTTACTGTTAAGACTACAACGGTATCTGATCGTTTTCGATCCCCTAACCTTCGTTCTTGATTAATGAAAACGTCCTTGGCAGATGCTTTCGCACTCGTCGGTCTTGCGTCAATCCAAGAATTTCACCTCTAGCGATGCAATACCAATGCCCCCGACCATCCCTATTCATCATTACGGCGACTCTAGAAGCCAACAAAATAGAACCGCGTGCG	KJ417176	341	1.66285e-142	0.94	1	386	0	0	0	0	0	0	0	0	0	0	0	0	0	0	0	0	0	0	0	0	7	0	0	0	0	0	0	0
S1196_0244	Glomeromycota	Glomeromycetes	TCCCGTGTTGAGTCAAATTAAGCCGCAGGCTCCACTCCTGGTGGTGCCCTTCCGTCAATTCCTTTAAGTTTCAGCCTTGCGACCATACTCCCCCCGGAACCCAAACACTTTGGTTTCCCTTAAGGCGCCGAGCGAGTCATATTTGAATGTAACATCGCCCGATCCCTAGTCGGCATAGTTTATGGTTAAGACTACGACGGTATCTGATCGTCTTCGATCCCCTAACTTTCGTTCTTGATTAATGAAAACATCCTTGGCAAATGCTTTCGCAGAAGTTAGTCTTCAATAAATCCAAGAATTTCACCTCTGACAATTGAATACTAATGCCCCCAACTATCCCTATTAATCATTACGGTGGTCCTAGAAACCAACAAAATAGAACCAGCCCG	EF136887	360	6.33367e-151	0.96	2	389	0	18	0	0	0	0	0	0	0	0	0	0	0	2	0	1	4	0	0	2	0	0	0	0	0	1	0	0
S1196_0245	Chytridiomycota	Chytridiomycetes	CCCCGTGTTGAGTCAAATTAAGCCGCAGGCTCCACTCCTGGTGGTGCCCTTCCGTCAATTCCTTTAAGTTTCAGCCTTGCGACAGTACTCCCCCCGGAACCCAAACACTCTGATTTCTCTCAAGGTGCCGAACGAGCCAATAAAAGCATCGTCCGATCCCTGGTCGGCATCGTTTATGGTTAAGACTACGACGGTATCTAATCGTCTTCGATCCCCTAACTTTCGTTCTTGATTAATGAAAACATCCTTGGCAGATGCTTTCGCAAGAGTTAGTCTTGCGTAAATCCAAGAATTTCACCTCTGACAACGCAATACTAATGCCCCCAACTGTCCCTATTAATCATTACTCTGGTCCTGGAAACCAACAAAACAGAACCACAG	AY987437	330	1.20402e-137	0.93	1	381	0	0	0	6	4	0	0	0	0	0	1	5	0	0	0	0	0	0	0	0	0	0	0	0	0	0	0	0
S1196_0246	Ascomycota	Sordariomycetes	CCCCGTGTTGAGTCAAATTAAGCCGCAGGCTCCACCCCTGGTGGTGCCCTTCCGTCAATTTCTTTAAGTTTCGGCGTTGCCACTATACTCCCCCAGGAGCCCAAGCACTTTGATTTCTCGTAAGGTGCCGGACGAGTCATAAATTAACATCGTCCGATCCCTAGTCGGCATAGTTTATGGTTAAGACTACGACGGTATCTGATCGTCTTCGATCCCCTAACTTTCGTTCCTGATTAATGAAAACATCCTTGACAAATGCTTTCGCAGTAGTTAGTCTTTCATAGATCCAAGAATTTCACCTCTGACTATGAAATACTGATGCCCCCGACTGTCCCTATTAATCATTACGGCGGTCCTAGAAACCAACAAAATAGAACCGCACG	DQ643653	357	1.32677e-149	0.96	1	383	0	0	0	0	6	0	0	0	0	0	0	0	0	0	0	0	0	0	0	0	0	0	0	0	0	0	0	0
S1196_0249	Chytridiomycota	Fungi_other	TTCCATGTTGAGTCAAATTAAGCTGCAGGCTCCACACCTGGTTGTGCCCTTCTGTCGATTCCTTTAAGTTTCAGCCCTGCAACCATACTCCCCCCAGTACCCAAAGACTTTGATTCTTATAAGGTGCCAAACAAGTCATGATAACATCATCCAATCCTTAGCCAGCATAGTTTATGGTCAAGACTACAACGGTATCTAATCATCTTCAATCCCCTGACTTTGGTTCTTGATTAATGAAAACATCCTTGGCAAATGCTTTTGCGGTAGTTAGTCTTTCATAAATCCAAGAATTTCACCTTTGACAATTAAATACTAATGCCCCCAACTATCCCTATTAATCATTACTTCAGTCCTAGAAACCAACAAAATAGAACCAAAGTCCTATTCTATTATTCCATG…	DQ536484	338	3.65106e-141	0.92	3	401	0	0	0	0	0	0	0	0	0	0	0	0	0	0	0	0	0	21	0	0	0	0	0	0	0	0	0	0
S1196_0251	Basidiomycota	Fungi_other	CCCCATGTTGAGTCAAATTAAGCCACAGGCTCCACACCAAGTGGTGCCCTTCTGTCAATTCCTTTAAGTTTCAGCCTTGCAACCATACTCCCCCTAGAACCCAAAGACTTTAATTTCTCATAAGATGCTGAGTGACACATCATAATTGAGGTTGCCTGATCCCTAGTCAGCATAGTTTACTGTCAAGACTACAATGGTATCTGATTGTTTTCAATCCCCTAACCTTCATTCTTGATTAATGAAAACATCCTTGGCAAATGCTTTTGCAATAGTCAGTCTTGAGTCAATCCAAGAATTTCACCTCTAGCAACTCAATACCAATGCCCCCAACTATCCCTATTAATCATTATGGTGATTCTAGAAACCAACAAAATAGAACCACACA	DQ435809	334	2.06044e-139	0.93	1	384	0	0	0	0	0	0	0	0	0	0	0	0	0	8	0	0	0	0	0	0	0	0	0	0	0	0	0	0
S1196_0253	Chytridiomycota	Chytridiomycetes	TCCCGTGTTGAGTCAAATTAAGCCGCATACTCCACTCCTGGTGGTGCCCTTCCGTCAATTCCTTTAAGTTTCAGCCTTGCGACTATACTCCCCCCGGAACCCAAAAACTTTGATTTCTCATAAGGTGCCGAACGAGTCATTAAGGAACATCGTCCGATCCCTAGTCGGCATAGTTTACGGTTAAGACTACGACGGTATCTGATCGTCTTCGATCCCCTAACTTTCGTTCTTGATTAATGAAAACATCCTTGGCAAATGCTTTCGCAGAAGTTAGTCTTTAATAAATCCAAGAATTTCACCTCTGACAATTAAATACTAATGCCCCCAACTGTCCCTATTAATCATTACTTCAGTTCTAGAAACCAACAAAATAGAACCAAAG	EU910609	357	1.32276e-149	0.96	2	382	0	9	0	0	0	1	0	0	0	0	0	0	0	0	0	0	0	0	0	0	0	0	0	0	0	0	2	0
S1196_0254	Ascomycota	Eurotiomycetes	TCCCGTGTTGAGTCAAATTGAGCCGCAAGCTCCACTCCTGGTGGTGCCCTTCCGTCAATTCCTTTAAGTTTCAGCCTTGCGACCATACTCCCCCCAGAACCCAAAGACTTTGATTTCTCGTAAGGTGCCGAACGGGTCATCATAAAAACACCGTCCGATCCCTAGTCGGCATAGTTTATGGTTAAGACTACGACGGTATCTGATCGTCTTCGATCCCCTAACTTTCGTTCCCTGATTAATGAAAACATCCTTGGCGAATGCTTTCGCAGTAGTTAGTCTTCAGTAAATCCAAGAATTTCACCTCTAGCAACTGAATACTAATGCCCCCAACTATCCCTATTAATCATTACGGCGACTCTAGAAACCAACAAAATAGAACCGCACG	AY526486	352	2.18934e-147	0.95	2	385	0	0	0	1	2	9	0	1	0	0	4	1	1	2	3	1	0	0	0	3	0	0	0	0	0	0	0	0
S1196_0256	Ascomycota	Fungi_other	CCCCGTGTTGAGTCAAATTAAGCCGCAGGTTCCACCCCTGGTGGTGCCCTTCCGTCAATTTCTTTAAGTTTCAGCCTTGCGACCATACTTCCCCCGGAGCCCACGAATTTTGATTTCTCGATAGGTGCCGAGCGAGTCAAGAAAGAACATCGCCCGATCCCTAATCGGCATAGTTTATGGTTGAGACTACGACGGTATCTGATCGTCTTCGATCCCCCAACTTTCGTTCCTGATCAGCGAAAACGTCCTTGGCAAATGCTTTCGCAGTAGTTCGTCTTCAATCGGTCCAAGAATTTCACCTCTGACGATTGAATACGGATGCCCCCGACCGTCCCTATTGATCATTACGGCGGTTCTAGAAACCAACAAAATAGAACCAACG	AY484511	332	1.57033e-138	0.93	1	382	0	5	0	0	2	0	0	0	0	0	0	0	0	1	0	0	0	0	0	0	0	0	0	0	0	0	0	0
S1196_0258	Ascomycota	Xylonomycetes	CCCCGTGTTGAGTCAAATTAAGCCGCAGGCTCCACTCCTGGTGGTGCCCTTCCGTCAATTTCTTTAAGTTTCAGCCTTGCGACCATACTCCCCCCAGAATCCAAAAACTTTGATTTCTCGTAAGGTGCCGATCGAGTCAAAATAGTAACATCGACCGATCCCTAGTTGACATAGTTTATGGTTAAGACTACGACGGTATCTGATCGTCTTCGATCCCCTAACTTTCGTTCACTGATTAATGAAAACATCCTTGGCAAATGCTTTCGCAGTAGTTAGTCTTCAATAAATCCAAGAATTTCACCTCTGACAATTGAATACTGATGCCCCCGACTGTCCCTATTAATCATTACGGCGGTCCTAGAAACCAACAAAATAGAACCACACG	FJ176833	369	6.45129e-155	0.97	1	385	0	0	1	3	1	1	0	1	0	1	9	0	3	26	3	2	12	0	7	2	13	15	3	13	1	3	0	0
S1196_0259	Basidiomycota	Fungi_other	CCCCGTGTTGAGTCAAATTAAGCCGCATGTTCCACAGCTTGTGGTGCCCTTCCGTCAATTCCTTTAAGTTTCAGCCTTGCGACCATACTCCCCCCCGAACCTAAACTTAAAGATTTCTCTTCGGGTGCTGAACGGGTCATCATAATCCCCGTCCAATCCCCAGTCGGCATCGTTTACTGTTAAGACTACAACGGTATCTGATCGTTTTCGATCCCCTAACCTTCGTTCTTGATCAATGAAGGCATCCTTGGCAGATGCTTTCGCAGTAGTTCGTCTTTCGAAAATCCAAGAATTTCACCTCTAGCATCGAAATACGAATGCCCCCAACTACCCCTATTTATCATTACCGCAATCCTAGAAACCAACAAAATAGAACCACACG	JQ627510	321	1.17159e-133	0.92	1	382	0	2	0	0	0	0	0	0	0	0	0	1	2	10	0	1	3	0	0	0	2	2	0	1	0	0	0	0
S1196_0260	Ascomycota	Sordariomycetes	CCCCGTGTTGAGTCAAATTAAGCCGCAGGCTCCACACCTTGTGGTGCCCTTCCGTCAATTTCTTTAAGTTTCAGCCTTGCGACCATACTCCCCCAGGAGCCCAAACATTTTGATTTGTCGTAAGGTGCCGAACGAGGCAAAAAGTACCATCGTCCGATCCCTAATCGGCATAGTTTATGGTTAAGACTACGACGGTATCTGATCGTCTTCGATCCCCTAACTTTCGTTCCTGATTAATGAAAACATCCTTGGCGAATGCTTTCGCAGTAGTTCGTCTTCCATGGATCCAAGAATTTCACCTCTGACCAGGGAATACGGACGCCCCCGACTGTCCCTATTAATCATTACGGCGGTCCTAGAAACCAACAAAACAGGACCGCGCG	AY502933	345	2.74511e-144	0.95	1	383	74	40	29	12	12	11	9	13	0	11	143	15	5	29	50	17	42	15	56	12	20	19	42	41	23	28	19	0
S1196_0261	Ascomycota	Archaeorhizomycetes	CCCCGTGTTGAGTCAAATTAAGCCGCAGGCTCCACTCCTGGTGGTGCCCTTCCGTCAATTCCTTTAAGTTTCAGCCTTGCGACCATACTCCCCCCAGAACCCAAAAACTTTGATTTCTCTTAAGGTGCCGAGCGAGTCGTTTGAAACTGCGCCCGATCCCTAGTCGGCATAGTTTATGGTTAAGACTACGACGGTAATCGTCTTCGATCCCCTAACTTTCGTTCTTGATTAATGAAAACATCCTTGGCAAATGCTTTCGCAGTAGTTAG	EU154983	240	5.89774e-98	0.94	1	269	23	762	1	591	126	31	21	2	0	16	438	3756	408	7352	108	51	1641	151	996	188	599	34	48	457	10	98	14649	17274
S1196_0265	Zoopagomycota	Zoopagomycetes	CCCCGTGTTGAGTCAAATTAAGCCGCAGGCTCCACTCCTGGTGGTGCCCTTCCGTCAATTCCTTTAAGTTTCAGCCTTGCGACCATACTCCCCCCGGAACCCAAACACTTTGATTTCTCGGAAGGTGCCGGGCAAGTCAGTAAACAACATTGCCCGATCCCTAGTCGGCATCGTTTATGGTTAGGACTACAACGGTATCTAATCATCTTCGATCCCCTAACTTTAGCTCCTGATCAAAGAAAACATCCTTGGCAAATGCTTTCGCATAAGTTCGTCTTTCCCAAATCCAAGAATTTCACCTCTAGCTGGGAAATACGAATGCCCCCAACTGTTCCTATCGGTCATTACCGCGGCCCCTGGAAACCAACGAAATAAAAGACCACGGTCCTATTTTATTAT…	AY548297	315	5.749e-131	0.89	1	408	0	0	0	0	5	0	0	0	0	0	0	0	3	1	0	0	0	0	0	0	0	0	0	0	0	0	0	0
S1196_0268	Entomophthoromycota	Entomophthoromycetes	CCCCGTGTTGAGTCAAATTAAGCCGCAGGCTCCACTTCTGGTGGTGCCCTTCCGTCAATTCCTTTAAGTTTCAGCCTTGCGACCATACTCCCCCCGGAACCCAAAAACTTTGATTTCTCATATGGTGCCAAACGAGCCAAAAAATAGCATCGTCTGATCCCAAGTCGGCATAGTTTATGGTTAAGACTACGACGGTATCTAATCGTCTTCGATCCCCTAACTTTCGTTCTTGATTAATGAAAACATCCTTGGCAAATGCTTTCGCAGAAGTTAGTCTTTCATAAATCCAAGAATTTCACCTCTGACAATTAAATACTAATGCCCCCAACTATCCCTATTAATCATTACCTTGGTCCTTAAAACCAACAAAATAGAACCAGGG	AF368505	353	7.82352e-148	0.96	1	379	0	0	0	0	1	0	0	0	0	0	0	0	45	1	12	0	0	0	0	1	0	0	0	0	0	0	0	0
S1196_0270	Basidiomycota	Agaricomycetes	CCCCGTGTTGAGTCAAATTAAGCCACAGGCTCCACACCTGGTGGTGCCCTTCCGTCAATTCCTTTAAGTTTCAGCCTTGCGACCATACTCCCCCCAGAACCCAAAGACTTTGATTTCTCGAAAGGTGCCGAGTGATACATATAATTTGAATTCACCCGATCCCTAGTCGGCATAGTTTACTGTTAAGACTACAACGGTATCTGATCGTTTTCGATCCCCTAACCTTCGTTCTTGATTAATGAAAACATCCTTGGCAAATGCTTTCGCAGTAGTTGGTCTTGAGTCAATCCAAGAATTTCACCTCTAGCGACCCAATACCAATGCCCCCAACTATCCCTATTAATCATTACGGCGACTCTAGAAACCAACAAAATAGAACCGCACG	DQ851575	366	1.3759e-153	0.97	2	385	1	2	0	0	0	0	0	0	0	0	0	24	0	1	0	0	1	0	0	0	0	0	0	0	1	0	0	0
S1196_0271	Ascomycota	Fungi_other	CCCCGCAATTTGAGCATGTCACCCCCCAGTCTTGACAGGGGACTAGTTCACAAGGCACCACCTCACCCTTTCAGGCTGCTTTATGGAGCAGAGTCACTGCGGCAACCGGCGACGGTTTACTCCTGGTGGTGCCCTTCCGTCAATTCCTTTAAGTTTCAGCCTTGCGACCATACTCCCCCCAGAACCCAAAAACTTTGATTTCTCTTAAGGTGCCGAGCGAGTCATTTGAAACTGCGCCCGATCCCTAGTCGGCATAGTTTATGGTTAAGACTACGACGGTATCTAATCGTCTTCGATCCCCTAACTTTCGTTCTTGATTAATGAAAACATCCTTGGCAAATGCTTTCGCAGTAGTTAGTCTTCAATAAATCCAAGAATTTCACCTCTGACAATTGAATA…	AY789340	344	9.48642e-144	0.91	45	463	0	0	0	0	0	0	0	0	0	0	1	0	0	11	0	0	0	0	0	0	0	0	0	0	0	0	0	0
S1196_0272	Ascomycota	Fungi_other	CCCCGTGTTAAGTCAAATTAAGCTGCAGGCTCTACTCCTGGTGGTGCCCTTCCGTCAATTCCTTTAAGTTTCAGCTTTGCGACCATACTCCCCCCAGAACCCGAAAACTTTGATTTCTCTTAAGGTGCCGAGCGAGTCGATTTGATACTGCGCCTGATCCCTAGTCGGTATGGTTTATGGTTAAGACTATGATGGTATCTAATCGTCTTCGATCCCTAACTTTCGATCTTGATTAATGAAAACATCCTTGGCAAATGCTTTCACAGTAGTTAGTCTTCAATAAATCCAAGAATTTCACCTCTGATAATTGAATACTAATGCCCCTAACTATCCCTATTAATCATTACGGCAGTCCTAGAAACCAATAAAATAGGATCGACG	AY124370	312	1.13313e-129	0.91	1	373	0	0	0	0	0	0	0	0	0	0	0	26	0	0	0	0	0	0	0	0	0	0	0	0	0	0	0	0
S1196_0274	Ascomycota	Fungi_other	CCCCGTATTAAGTCAAATTAAGCCGCAGGCTCCACCCCTAGTGGTACCCTTCCGTCAATTTCTTTAAGTTTCAGCCTTACGACTATACTCCCCCCGGAACGCAGAAACTTATACTTTCGTATAAGGTGCCGAACGAGTCAAAAAATAACATCGTCCGATCCCTAATTCGTATAGTTTATGATTAAGACTACGACGATATCTGATCGTCTTCGATCCCTTAACTTTCGTTCCTGATTAATGAAAACATCTTTGGCAAATGTTTTCGCAGTAATTAATCTTTAATAAATCTAAGAATTTCACCTTTGACAATTAAATATTGATGCTCCCGACTATCCCTATTAATCATTACGGCGGTCCTAAAAACCAATAAAATAAAACCGCAACG	DQ470998	320	3.27857e-133	0.91	1	382	0	0	0	0	0	0	0	0	0	0	0	0	0	0	0	0	0	0	7	0	0	0	0	0	0	0	0	0
S1196_0275		Fungi_other	CCCCGTGTTGAGTCAAATTAAGCCGCAGGCTCCACTCCTGGTGGTGCCCTTCCGTCAATCCCTTTAAGTTTCAGCCTTGCGACCATACTCCCCCCGGAACCCAAAAACTTTGATTTCTCATAAGGTGCCAAGCGAGACATTTTAAATATACTCGCCTGATCCCTAGTTGGCATAGTTTATGGTTAAGACTACGACGGTATCTGATCGTCTTCGATCCCCTAACTTTCGTTCTTGATCAATGAAAACATCCTTGGCAAATGCTTTCGCAGAAGTTAGTCTTTCATAAATCCAAGAATTTCACCTCTGACAATTAAATACTAATGCCCCCAACTATCCCTATTAATCATTACGGCGGTCCTAGAAACCAACAAAATAGAACCACACG	DQ973004	349	4.66932e-146	0.95	1	385	0	0	0	0	0	0	0	0	0	0	0	0	0	5	0	0	3	0	0	0	0	0	0	0	0	0	0	0
S1196_0277	Basidiomycota	Agaricomycetes	CCCCGTGTTGAGTCAAATTGAGCCGCAGGCTCCACACCTGGTGGTGCCCTTCCGTCAATTCCTTCAAGTTCCAGCCTTGCGACCATACTCTCCCCAGAACCCAAAGACTTTGATTTCTCGTAAGGTGCCGAGTGACACATCATAATTGAGGTCACCCGATCCCTAGTCGGCATAGTTTACTGTTAAGACTACAACGGTATCTGATCGTTTTCGATCCCCTAACCTTCGTTCTTGATTAATGAAAACATCCTTGGCAAATGCTTTCGCAGTAGTTGGTCTTGAGTCAATCCAAGAATTTCACCTCTAGCGACTCAATACCAATGCCCCCAACTATCCCTATTAATCATTACGGCGACTCTAGAAACCAACAAAATAGAACCGCACA	DQ851579	372	3.02486e-156	0.98	1	384	9	0	0	0	0	5	0	0	0	0	0	0	0	0	0	2	0	0	0	2	0	0	0	0	0	8	0	0
S1196_0279	Ascomycota	Eurotiomycetes	TCCCGTGTTGAGTCAAATTAAGCCGCAGGCTCCACGCCTTGTGGTGCCCTTCCGTCAATTTCTTTAAGTTTCAGCCTTGCGACCATACTCCCCCCAGAGGCCAAAAACTTTGATTTCTCGTAAGGCGCCGAACGGGGCATAAAAAACCACCGTCCGATTCCTAGTCGCCATGGTTTATGGTTAAGACTACGACGGTATCTGATCGTCTTCGATCCCCTAACTTTCGTTCACTGATTAATGAAAACATCCTTGGCGAATGCTTTCGCAATAGTTAGTCTTCAATAAATCCAAGAATTTCACCTCTGACAATTGAATACTGACGCCCCCGACTATCCCTATTAATCATTACAGCGGTCCTAGAAACCAACAAAATAGAACCGATG	EU940024	376	5.08356e-158	0.99	2	383	0	0	0	0	0	0	0	0	0	0	0	0	0	0	0	0	0	0	1	0	0	0	0	0	0	0	0	0
S1196_0281	Chytridiomycota	Chytridiomycetes	CCCCGTGTTGAGTCAAATTAAGCCGCAGGCTCCACTCCTGGTGGTGCCCTTCCGTCAATTCCTTTAAGTTTCAGCCTTGCGACCATACTCCCCCCGGAACCCAAAAACTTTGATTTCTCGGAAGGTGCCGATGGAGTCATGAAAAGAACATCCACCGATCCCTAGTCGGCATCGTTTATGGTTAAGACTACGACGGTATCTAATCGTCTTCGATCCCCTAACTTTCGTTCTTGATTAATGAAAACATCCTTGGCAAATGCTTTCGCAGAAGTTAGTCTTTCATAAATCCAAGAATTTCACCTCTGACAATTAAATACTAATGCCCCCAACTATCCCTATTAATCATTACTTCGGCTTCAAAAACCAACAAAACAAAACCAAAG	JN020240	347	3.56943e-145	0.95	1	383	15	2	3	0	0	2	0	0	0	0	3	6	0	8	1	4	0	1	0	1	2	1	6	3	2	0	0	0
S1196_0283	Chytridiomycota	Chytridiomycetes	CCCCGTGTTGAGTCAAATTAAGCCGCAGGCTCCACTCCTGGTGGTGCCCTTCCGTCAATTCCTTTAAGTTTCAGCCTTGCGACCATACTCCCCCCGGAACCCAAAAACTTTGATTTCTCTGAAGGTGCCAAACAATGATATAAAATAAAATTGTCTGATCCCTAGTCGGCATAGTTTATGGTTAAGACTACGACGGTATCTGATCGTCTTCGATCCCTTAACTTTCGTTCTTGATTAATGAAAACATCCTTGGCAAATGCTTTCGCAGAAGTTAGTCTTTCATAAATCCAAGAATTTCACCTCTGACAATTAAATACTAATGCCCCCAACTGTCCCTATTAATCATTACTTTGGTCCTAGAAACCAACAAAATAGAACCAAAGTCCTATTTCATTATTC…	JN020240	373	1.15626e-156	0.96	1	405	0	8	0	0	0	0	0	0	0	0	0	0	0	0	0	0	0	0	0	0	0	0	0	0	0	0	0	0
S1196_0284	Glomeromycota	Glomeromycetes	CCCCGTGTTGAGTCATTAAAAAATTAACATCATCCGATCCCTAGTCGGCATAGTTTATGGTTAAGACTACGACGGTATCTGATCGTCTTCGATCCCCTAACTTTCGTTCTTGATTAATGAAAACATCCTTGGCAAATGCTTTCGCAGTAGTTAGTCTTCAATAAATCCAAGAATTTCACCTCTGACAATTGAATACTAATGCCCCCAACTATCCCTATTAATCATTACGTCGATCCTAGAAACCAACAAAATAGGATCAAACG	AY330273	255	1.29975e-104	1	9	263	0	0	0	0	0	0	0	1	0	0	0	1	0	0	0	0	0	0	0	0	0	1	1	0	0	0	1	0
S1196_0289	Ascomycota	Sordariomycetes	CCCCGTGTTGAGTCAAATTAAGCCGCAGGCTCCACCCCTGGTGGTGCCCTTCCGTCAATTTCTTTAAGTTTCAGCCTTGCGACCATACTCCCCCTGGAACCCAAAAACTTTGATTTCTCGTAAGGTGCCGAGCGAGTCAAATGGTAACATCGCCCGATCCCTAGTCGGCATAGTTTATGGTTAAGACTACGACGGTATCTGATCGTCTTCGATCCCCTAACTTTCGTTCCTGATTAATGAAAACATCCTTGGCAAATGCTTTCGCAGTAGTTAGTCTTCAGCAAATCCAAGAATTTCACCTCTGACAGCTGAATACTGATGCCCCCGACTGTCCCTATTAATCATTACGGCGGTCCTATAACCAACAAAATAGAACCGTACG	JQ627474	352	2.16961e-147	0.96	1	382	128	335	80	128	248	89	76	0	0	7	69	169	164	72	90	27	31	68	33	25	20	31	22	138	131	80	60	30
S1196_0292	Ascomycota	Fungi_other	CCCCGTGTTGAGTCAAATTAAGCCGCAGGCTCCACGCCTGGTGGTGCTCTTCCGTCAATTTCTTTAAGTTTCAGCCTTGCGACCATACTCCCCCCAGAACCCAACAACTCAGATTTCTCGCAGGGTGCCGAGGGAGTTAATAAATTACTACCCCCGATCCCCGGTCGGCATAGTTTACGGTCAAGACTACGACGGTATCTGATCGTCTTCGATCCCCTGACTTTCGTTCACTGATTAATGAAAACATCCTTGGCGAATGCCTTCGCATCGGTTCGTCTTCAGCAAATCCAAGAATTTCACCTCTGACAGCTGAATACGGACGCCCCCGACTGTCCCTTTTAATCATTACGGCGGTCTTAGAAACCAACAAAATAAGACCGCACG	U42476	317	6.9714e-132	0.91	1	384	0	0	2	0	0	0	0	0	0	0	0	0	0	0	0	0	0	0	0	0	0	0	0	0	0	0	0	0
S1196_0298	Ascomycota	Dothideomycetes	CCCCGTGTTGAGTCAAATTAAGCCGCAGGCTCCACGCCTGGTGGTGCCCTTCCGTCAATTTCTTTAAGTTTCAGCCTTGCGACCATACTCCCCCCAGAACCCAAACACTTTGATTTCTCGTAAGGTGCCGAAGGAGTCAAAATAGTAACATCCTCCGATCCCTAGTCGGCATAGTTTATGGTTAAGACTACGACGGTATCTGATCGTCTTCGATCCCCTAACTTTCGTTCACTGATTAATGAAAACATCCTTGGCAAATGCTTTCGCAGTAGTTTGTCTTCAATAAATCCAAGAATTTCACCTCTGACAATTGAATACAGATGCCCCCGACTATCCCTATTAATCATTACGGCGGTCCTAGAAACCAACAAAATAGAACCGCACG	EF053588	385	5.27182e-162	1	1	385	6	8	0	25	3	124	6	0	0	17	201	2	16	27	1	2	43	4	0	0	0	1	2	0	1	0	0	9
S1196_0299	Ascomycota	Dothideomycetes	CCCCGTGTTGAGTCAAATTAAGCCGCAGGCTCCACGCCTGGTGGTGCCCTTCCGTCAATTTCTTTAAGTTTCAGCCTTGCGACCATACTCCCCCCAGAAACAACTTTGATTTCTCAAAAGGTGCCGAGCGAGTCAATAAAGAAACATCGCCCGATCCCTAGTCGGCATAGTTTACGGTTAAGACTACGACGGTATCTGATCGTCTTCGATCCCCTAACTTTCGTTCACTGATTAATGAAAACATCCTTGGCAAATGCTTTCGCAGTAGTTAGTCTTCAATAAATCCAAGAATTTCACCTCTGACAATTGAATACTGATGCCCCCGACTATCCCTATTATTCATTACGGCGGTCCTAGAAACCAACAAAATAAGATCGCACGTCCTATTTTATTATTCCA…	U42485	377	1.9494e-158	0.96	1	404	0	0	0	0	0	0	0	0	0	0	0	0	0	0	0	0	0	0	0	0	0	0	0	3	0	0	0	0
S1196_0303	Glomeromycota	Glomeromycetes	CACCGTGTTGAGTCAAATTAAGCCGCAGGCTCCACCCCTGGTGGTGCCCTTTCATCAATTCCTTTAAGTTTCAGCCTTGCGACCATACTCTCCCCAGAACCCAAACACTTTGGTTTCCTTTGGTTTCCCGTAAGGCGCCGAATGAGTCATTAAAAATTAACATCATCCGATCCCTAGTCGGCATAGTTTATGGTTAAGACTACGACGGTATCTGATCGTCTTCGATCCCTTAACTTTCGTTCTTGATTAATGAAAACATCCTTGGCAAATACTTTCGCAGTAGTTAGTCTTCAATAAATCCAAGAATTTCACCTCTGACAATCGAATACTAATGCCCCCAACTATCCCTATTAATCATTACGTTGATCCTAGAAACCAACAAAATAGAACCACGCA	EF109861	334	2.1285e-139	0.94	3	388	0	0	0	0	0	0	0	0	0	0	0	0	0	0	0	0	16	0	0	0	0	0	0	0	0	0	0	0
S1196_0307	Basidiomycota	Fungi_other	CCCCGTGTTGAGTCAAATTAAGCCGCAGGCTCTATACCTAGTAGTACTCTTCTGTTAATTCCTTTAAGTTTTAGCCTTGCGACTATACTCCCCCTAGAACCCAAAGACTTTGATTTCTCGTAAGGTGCCGAGCAACATATCAAAATTAAGGTTGCCTAATCCCTAGTTAGCATAGTTTACTGTTAAGACTACAACAGTATCTAATTGTTTTCGATCCCCTAACCTTTGTTCTTGATTAATAAAAACATCCTTGGCAAATACTTTCGTAGTTGTTGGTCTTGAGTTAATCCAAGAATTTTACCTCTAGCAACTCAATACCAATGCCCCTAACTATCCCTATTAATTATTACAGCAACTCTAGAAACTAACAAAATAGAACTACATA	AF287833	311	3.18059e-129	0.91	1	379	0	0	0	0	3	0	0	0	0	0	0	0	0	0	0	0	0	0	0	0	0	0	0	0	0	0	0	0
S1196_0308	Ascomycota	Lecanoromycetes	CCCCGTGTTGAGTCAAATTAAGCCGCAGGCTCCACGCCTGGTGGTGCCTTTCCGTCAATTTCTTTAAGTTTCAGCCTTGCGACCATACTCCCCCCAGAACCCAAAGACTTTGATTTCTCGTAAGCTGCCGAGCGGGTCAAAATAATAACACCGCCCGATCGCTAGTCGGCATAGTTTATGGTTAAGACTACGACGGTATCTGATCGTCTTCGATCCCCTAACTTTCGTTCACTGATTAATGAAAACATCCTTGGCAAATGCTTTCGCAGTAGTTAGTCTTCCATAAATCCAAGAATTTCACCTCTGACAATGGAATACTGATGCCCCCGACTGTCCCTATTAATCATTACGGCGGTCCTAGAAACCAACAAAATAGAACCACACG	AY640997	375	1.41829e-157	0.98	1	385	0	2	1	28	0	92	1	1	0	1	6	19	10	1	3	1	1	0	0	3	1	7	2	12	2	24	0	5
S1196_0309	Ascomycota	Fungi_other	CCCCGTGTTGAGTCAAATTAAGCCGCAGGCTCCACGCCTGGTGGTGCCCTTCCGTCAATTTCTTTAAGTTTCAGCCTTGCGACCATACTCCCCCCAGAACCCAAACACTTGTGATTTCTCGCAAGGTGCTGAGCGGGTCATCAAATGAACCCCACCCAATCCCTAGTCGGCATGGTTTACGGTTGAGACTACGACGGTATCTGATCGTCTTCGATCCCCCAACTTTCGTTCGACTGATTAATGAAAACATCTTTGGCAAATGCTTTCGCAGTGGTTAGTCTTCAGCAAATCCAAGAATTTCACCTCTGACAGCTGAATACTGATGCCCCCAACCATCCCTGTTAATCATCACGGTGGCGCTAGAAACCAACAAAATAGAACCACACG	AF238302	331	4.4208e-138	0.93	1	387	12	0	16	0	0	0	0	0	0	0	0	0	0	0	0	0	0	0	0	0	0	1	0	0	0	0	0	0
S1196_0312	Chytridiomycota	Chytridiomycetes	CCCCGTGTTGAGTCAAATTAAGCCGCAGGCTCCACTCCTGGTGGTGCCCTTCCGTCAATTCCTTTAAGTTTCAGCCTTGCGACCATACTCCCCCCAGAACCCAAAAACTTTGGTTTCCCATGAGGTGCCGAACGAGTCAAGAAAATAACATCGTCCGATCCCTAGTCGGCATAGTTTATGGTTAAGACTACGACGGTATCTGATCGTCTTCGATCCCCTAACTTTCGTCCTTGATTAATGAAAACATCCTTGGCAAATGCTTTCGCAGAAGTTAGTCTTTCATAAATCCAAGAATTTCACCTCTGACAATTAAATACTAATGCCCCCAACTATCCCTATTAATCATTACTTCGGTCCTAGAAACCAACAAAATAGAACCAAAG	JN020240	371	8.33815e-156	0.98	1	383	4	1	1	34	0	31	7	8	0	16	11	2	1	0	0	0	0	0	0	0	5	2	0	1	3	1	1	5
S1196_0315	Basidiomycota	Agaricomycetes	CCCCGTGTTGAGTCGAATTAAGCCGCAGGCTCCACACCTGGTGGTGCCCTTCCGTCAATTCCTTTAAGTTTCAGCCTTGCGACCATACTCCCCCCAGAACCCAAAGACTTTGATTTCTCGTAAGGTGCCGAATGACACATAATAATTGAGTTCATCCGATCCCCAGTCGGCATAGTTTACTGTTAAGACTACAACGGTATCTAATCGTTTTCGATCCCCTAACCTTCGTTCTTGATTAATGAAAACATCCTTGGCAAATGCTTTCGCAGTAGTTGGTCTTGAGTCAATCCAAGAATTTCACCTCTAGCGACTCAATACCAATGCCCCCAACTATCCCTATTAATCATTACGGCGACTCTAGAAACCAACAAAATAGAACCGCACG	AF287835	377	1.84418e-158	0.98	1	385	1	175	313	158	230	585	118	0	0	118	23	324	998	24	38	395	91	0	1	15	7	50	1	94	58	83	50	35
S1196_0316	Ascomycota	Laboulbeniomycetes	CCCCGTGTTGAGTCAAATTAAGCCGCAGGCTCCACGCCTGGTGGTGCCCTTCCGTCAATTTCTTTAAGTTTCAGCCTTGCGACCATACTCCCCCCAGAACCCAAAAACTTTGATTTCTCATAAGGTGCCGAGTGAGTCATAAAAGAAACACCACCCGATCCCTAGTCGGCATAGTTTATGGTTAAGACTACGACGGTATCTGATCGTCTTCGATCCCCTAACTTTCGTTCCTGATTAATGAAAACATCTTTGGCAAATGCTTTCGCAGTAGTTAGTCTTCAATAAATCCAAGAATTTCACCTCTGACAATTGAATACTGATGCCCCCATCTATCCCTATTAATCATTACGGTGGTCCTAGAAACCAACAAAATAGAACCACACG	FJ176839	370	2.31932e-155	0.98	1	384	9	21	3	1	101	0	7	0	0	1	1	9	12	0	1	0	0	0	0	9	0	0	0	4	0	1	11	0
S1196_0317	Ascomycota	Fungi_other	CCCCGTGTTAAGTCAAATTAAGCCGCAGGCTCCACGCCTAGTAGTGCCCTTCCGTCAATTTCTTTAAGTTTCAGCCTTACGACCATACTCCCCCCAGAACCCAAAAACTTTAATTTCTCGTAAGGTGCCGAGCGAGTCAAAAAAAGAACATCGCCTAATCCCTAGTCGGCATAGTTTACGGTTAAGACTACGACGGTATCTGATCGTCTTCGATCCCCTAACTTTCGTTCACTAATTAATGAAAACATCCTTAGCAAATGCTTTCGCAGTAGTTAGTCTTCAATAAATCTAAGAATTTTACTTCTAACAATTGAATACTGATGCCCCTGACTGTCCCTATTAATCATTACGGCGACTCTAGAAACCAACAAAATAGAACCACACGTCCTATTTCATTAT…	U42481	365	4.07919e-153	0.94	1	408	0	0	0	0	6	0	0	0	0	0	0	0	0	0	0	0	0	0	0	0	0	0	0	0	0	0	0	0
S1196_0318	Ascomycota	Fungi_other	CCCCGTGTTGAGTCAAATTAAGCCGCAGGCTCCACGCCTGGTGGTGCCCTTCCGTCAATTTCTTTAAGTTTCAGCCTTGCGACCATACTCCCCCCAGAACCCAAAAACTTTGATTTCTCGTAAAGTGCCGACGGGGGCATAATACAACCACCCGCCGATCCTTAGTCGGCATAGTTTATGGTTAAGACTACGACGGTATCTGATCGTCTTCGATCCCCTAACTTTCGTTCACTGATTAATGAAAACATCCTTGGTGAATGCTTTCGCAGTAGTTAGTCTTCAGTAAATCCAAGAATTTCACCTCTGACAACTGAATACTGACACCCCCGACTATCCCTATTAATCATTACGGCTTCATATGAACCAACAAAATAAGAAGCCG	FJ358335	337	9.57388e-141	0.95	1	374	0	2	0	0	0	0	0	0	0	0	0	0	0	0	0	0	0	0	0	0	0	0	0	0	0	0	6	0
S1196_0320	Blastocladiomycota	Blastocladiomycetes	CCCCGTGTTGAGTCAAATTAAGCCGCATAATCCACTCCTGGTGGTGCCCTTCCGTCAATTCCTTTAAGTTTCAGCCTTGCGACCATACTCCCCCCAGAACCCAAAGACTTTGATTTCTCAAAAGGTGCCGGACGAGTCATTTAAAAAACTACAACGTCCGATCCCTGGTCGGCATCGTTTATGGTTAAGACTACGACGGTATCTAATCGTCTTCGATCCCTTAACTTTCGTCCTTGATTAATGAAAACATCCTTGGCAAATGCTTTCGCAGAAGTTAGTCTTTCCTAAATCCAAGAATTTCACCTCTGACAATTAAATACTAATGCCCCCAACTATCCCTATTAATCATTACTCTAGTCCTAGAAACCAACAAAAGTAGAACCAAAG	U23936	351	6.10793e-147	0.95	1	387	0	0	4	0	3	5	0	0	0	0	3	0	7	0	0	0	0	0	3	0	0	0	0	0	0	0	0	0
S1196_0321	Ascomycota	Pezizomycetes	CCCCGTGTTGAGTCAAATTAAGCCGCAGGCTCCACTCCTGGTGGTGCCCTTCCGTCAATTCCTTTAAGTTTCAGCCTTGCGACCATACTCCCCCCAGAACCCAAAGACTTTGATTTCTCGTAAGGTTCCGAGCGTGTCATAAAGAGAACATCGCCCGATCCCTAGTCGGCATAGTTTATGGTTGAGACTACGACGGTATCTGATCGTCTTCGATCCCTCAACTTTCGTTCCTGATTAATGAAAACATCCTTGGCAAATGCTTTCGCAGTAGTTCGTCTTCAATAAATCCAAGAATTTCACCTCTGACAATTGAATACGGATGCCCCCGACTATCCCTATTAATCATTACGGCGGTCCTAGAAACCAACAAAATAGAACCGCACG	U62008	384	1.45759e-161	1	1	384	1	2	0	8	77	31	12	0	0	0	1	0	39	0	0	0	0	2	0	1	1	6	0	41	0	1	0	1
S1196_0322	Ascomycota	Sordariomycetes	CCCCGTGTTGAGTCAAATTAAGCCGCAGGCTCCACTCCTGGTGGTGCCCTTCCGTCAATTTCTTTAAGTTTCAGCCTTGCGACCATACTCCCCCCGGAACGCAGAAACTTTACTTTCGTGTAAGGTGCCGAATGAGTCAAAGAATAACATCATCCGATCCCTAGTTCGCATAGTTTATAGTTAAGACTACGACGGTATCTGATCGTCTTCGATCCCCTAACTTTCGTTCCTGATTAATGAAAACATCCTTGGCGAATGCTTTCGCAGTAGTTGGTCTTCAATAAATCCAAGAATTTCACCTCTGACAATTGAATACCGACGCCCCCGACTGTCCCTATTAATCATTACGGCGATCCTAGAAACCAACAAAATAGAACCGCACGTCCTATTCCATTATTC…	DQ470998	377	1.96048e-158	0.96	1	406	135	5	29	0	11	0	65	0	0	2	115	6	1	1	25	49	0	0	0	0	1	3	5	17	7	20	0	0
S1196_0323	Glomeromycota	Glomeromycetes	TCCCGTGTTGAGTTAAATTAAGTCGCAGGCTCCACCCCTGGTGGTGCCCTTCCGTCAATTCCTTTAAGTTTCAGCCTTGCGACCATACTCCACCCGGAACCCAAACACTTTGGTTTCTCGTAAGGCGCCGAATGAGTCATTAAAAAATTAACATCATCCGATCTCTAGTCGGCATAGTTTATGGTTAAGACTACGACAGTATCTGATCGTCTTCGATCCCCTAACTTTCGTTCTTGATTAATGAAAACATCCTTGGCAAATGCTTTCGCAGTAGTTAGTCTTCAATAAATCCAAGAATTTCACCTCTAACAATTGAATACTAATGCCCCTAACTATCCCTATTAATCATTACGTCAATCCTAGAAACCAACAAAATAGAATTAAACATCCTATTCTATT…	AY903702	383	4.35873e-161	0.96	2	410	0	0	0	0	0	0	0	0	0	0	0	1	8	0	0	0	0	0	2	0	0	0	0	0	0	0	0	0
S1196_0325	Basidiomycota	Agaricomycetes	CCCCGTGTTGAGTCAAATTAAGCCACAGGCTCCACACCTGATGGTGCCCTTCTATCAATTCCTTTAAGTTTCAGCCTTGTGACCATACTCCCCCCAGAACCCAAAGACTTTGATTTCTCATAAGGTGCTGAGTGACACATAATAATTGAGATTGCCCAATCCATAGTCAGCATAGTTTACTGTTAAGACTACAACAGTATCTAATCGTTTTCGATCCCCTAACCTTCATTCTTGATTAATGAAAACATCCTTGGCAAATGCTTTCGCAATAGTTGGTCTTGAGTCAATCCAAGAATTTCACCTCTAGTGACTCAATACCAATGCCCCCAACTATCCCTATTAATCATTATGGTGACTCTAGAAACCAACAAAATAGAACCACACA	HQ728539	346	9.95853e-145	0.95	1	384	0	0	0	0	0	0	0	0	0	0	0	13	0	0	0	0	0	0	0	0	0	0	0	0	0	0	0	0
S1196_0329	Ascomycota	Eurotiomycetes	CCCCGTGTTGAGTCAAATTAAGCCGCAGGCTCCACGCCTTGTGGTGCCCTTCCGTCAATTTCTTTAAGTTTCAGCCTTGCGACCATACTCCCCCCCGAGCCCAAACACTTTGATTTCTCACAAGGTGCTGAACGGGGCATTCAAATACCCCCGTCCAATCCCTAGTCGGCATAGTTTATGGTTAAGACTACGACGGTATCTGATCGTCTTCGATCCCCTAACTTTCGTTCACTGATTAATGAAAACATCCTTGGCGAATGCTTTCGCAGTAGTTCGTCTTCAATAAATCCAAGAATTTCACCTCTGACAATTGAATACGGACGCCCCCGACTATCCCTATTAATCATTACAGCGGTCCTAGAAACCAACAAAATAGAACCGATG	EF053580	368	1.7837e-154	0.97	1	384	0	0	0	0	0	1	0	6	0	4	0	0	0	0	0	0	0	0	0	0	0	0	0	0	0	0	0	0
S1196_0331	Basidiomycota	Agaricomycetes	CCCCGTGTTGAGTCAAATTAAGCCGCAGGCTCCACACCTAGTGGTGCCCTTCCGTTAATTCCTTTAAGTTTTAGCCTTGCGACCATACTCCCCCCAGAACCCAAAGACTTTGATTTCTCGTAAGGAGCTAAGCAACACATCAAAATTGAGGTTGCCCAATCCCTAGTCAGCATAGTTTACTGTTAAGACTACAACGGTATCTGATTGTTTTCGATCCCCTAACCTTTGTTCTTGATTAATGAAAATATCCTTGGCAAATGCTTTCGCAGTTGTTGGTCTTGAGTTAATCCAAGAATTTCACCTCTAGCGACTCAATACCAATGCCCCCAACTATCCCTATTAATTATTACGGCGACTCTAGAAACTAACAAAATAGAACTGCACG	AF287833	351	6.07146e-147	0.95	1	385	0	0	0	0	10	0	0	0	0	0	0	0	0	0	0	0	0	0	0	0	0	0	0	0	0	0	0	0
S1196_0332	Basidiomycota	Agaricomycetes	CCCCGTGTTGAGTCAAATTAAGCCGCAGGCTCCACACCTGGTGGTGCCTTCCTTTAAGTTTCAGCCTTGCGACCATACTCCCCCCAGAACCCAAAGACTTTGATTTCTCGTAAGGTGCCGGACGATACATCATATTTGAGGTCGTCCGATCCCTAGTCGGCATAGTTTACTGTTAAGACTACAACGGTATCTGATCGTTTTCGATCCCCTAACCTTCGTTCTTGATTAATGAAAACATCCTTGGCAGATGCTTTCGCAATAGTTGGTCTTGAGTCAATCCAAGAATTTCACCTCTAGCGACTCAATACCAATGCCCCCAACTATCCCTATTAATCATTACGGCGACTCTAGAAACCAACAAAATAGAACCGCACG	JF706311	346	9.65947e-145	0.96	1	375	0	0	0	1	0	0	0	0	0	0	0	0	0	0	0	0	0	0	0	0	0	0	0	0	0	0	0	0
S1196_0333	Chytridiomycota	Chytridiomycetes	CCCCGTGTTGAGTCAAATTAAGCCGCAGGCTCCACTCCTGGTGGTGCCCTTCCGTCAATTCCTTTAAGTTTCAGCCTTGCGACCATACTCCCCCCGGAACCCAAAAACTTTGATTTCTCATAAGGTGCCGAACGATGCAATAAATTTACATTCGTCCGATCCCTAGTCGGCATAGTTTATGGTTAAGACTACGACGGTATCTGATCGTCTTCGATCCCCTAACTTTCGTTCTTGATTAATGAAAACATCCTTGGCAAATGCTTTCGCAGAAGTTAGTCTTTCATAAATCCAAGAATTTCACCTCTGACAATTAAATACTAATGCCCCCAACTGTCCCTATTAATCATTACGACGATTCTAGAAACCAACAAAATAGAACCGCACG	JN020240	358	4.81316e-150	0.97	1	380	0	0	0	0	2	0	0	0	0	0	1	1	3	0	11	25	0	0	0	0	0	1	1	1	2	15	0	0
S1196_0334	Ascomycota	Sordariomycetes	CCCCGTGTTGAGTCAAATTAAGCCGCAGGTTCCACCCCTGGTGGTGCCCTTCCGTCAATTTCTTTAAGTTTCAGCCTTGCGACCATACTCCCCCTGGAGCCCAAGCATTTTGATTTCTCGAAAAGTGCCGAGCGAGTCAAAAAATAACATCGCCCGATCCTTAATCGGCATAGTTTATAGTTAAGACTACGACGGTATCTGATCGTCTTCGATCCCCTAACTTTCGTTCCTTATCAATGAAAACATCCTTGGCAAATGCTTTCGCAGTAGTTAGTCTTCAATAGATCCAAGAATTTCACCTCTGACAATTGAATACTGATGCCCCCGACTGTCCCTATTAATCATTACGGCGGTCCTAGAAACCAACAAAATAGAACCACGCG	AF050482	369	6.41254e-155	0.98	1	383	0	0	0	0	0	0	0	0	0	0	0	23	76	0	0	0	0	0	0	0	0	0	0	0	0	0	0	0
S1196_0335	Chytridiomycota	Chytridiomycetes	CCCCGTGTTGAGTCAAATTAAGCCGCAGGCTCCACTCCTGGTGGTGCCCTTCCGTCAATTCCTTTAAGTTTCAGCCTTGCGACCATACTCCCCCCGGTACCCAAAGACTTTGATTTCTCATAAGGTGCCGAGCAGGTCATAAAATACACTGCCCGATCCCTAGTCGGCATAGTTTATGGTCAAGACTACGACGGTATCTGATCGTCTTCGATCCCCTGACTTTCGTTCTTGATTAATGAAAACATCCTTGGCAAATGCTTTCGCAGAAGTTAGTCTTTCATAAATCCAAGAATTTCACCTCTGACAATTAAATACTAATGCCCCCAACTATCCCTATTAATCATTACTTCGGTCCTAGAAACCAACAAAATAGAACCAAAGTCCTATTTCATTATTCCA…	DQ536483	378	7.02946e-159	0.96	1	404	0	0	0	0	0	0	0	0	0	0	10	0	0	10	0	9	46	0	0	0	1	0	0	0	0	0	0	0
S1196_0336	Kickxellomycota	Kickxellomycetes	TCCCGTGTTGAGTCAAATTAAGCCGCAGGCTCCACACCTGGTGGTGCCCTTCCGTCAATTCCTTTAAGTTTCAGCCTTGCGACCATACTCCCCCCGGAACCCAAACTCTCTGATTTCTCGCAAGGTGCCGAATGAGCCATTTAAAGAGCTACATCCGATCCCTGGACGGCATCGTTTATGGTTAAGACTACGACGGTATCTAATCGTCTTCGATCCCCTAACTTTCGTTCTTGATTAATGAAAACATCCCTGGCAGATGCTTTCGCATTAGTTCGTCTTTACTAAATCCAAGAATTTCACCTCTAGCAAGTAAATACGAATGCCCCCAACTGTCCCTATTAATCATTACTCTGGCCCTGGAAACCAACAAAACAGAACCAACAG	JQ004926	384	1.45759e-161	1	1	384	3	2	7	9	7	6	0	1	0	0	1	28	28	4	0	3	0	0	0	0	1	1	0	0	0	0	2	3
S1196_0340	Zoopagomycota	Zoopagomycetes	CCCCGTGTTGAGTCAAATTAAGCCGCAGGCTCCACTCCTGGTGGTGCCCTTCCGTCAATTCCTTTAAGTTTCAGCCTTGCGACCATACTCCCCCCGGAGCCTAGAAACTTTGATTTCTCGTAAGGTGCCGAGCGGGCCATCAAACAATAGCACCGCCCGATCCCTAGTCGGCATAGTTTATGGTTAAGACTACGACGGTATCTAATCGTCTTCGATCCCCTAACTTTCGTTCTTGATTAATGAAAACATCCTTGGCAGATGCTTTCGCAGTAGTTCGTCTTTAATAGATCCAAGAATTTCACCTCTGACAATTAAATACGAATGCCCCCAACTGTCCCTATTAATCATTACCGTGGCTCCTAAAAACCAACAAAATAGAACCAAGG	DQ643781	385	5.28765e-162	0.99	1	386	4	9	6	0	0	0	10	3	0	6	8	15	0	2	4	1	2	3	13	0	0	7	2	1	7	11	0	1
S1196_0345	Basidiomycota	Fungi_other	CCCCGTGTTGAGTCAAATTAAGCCGCAGGCTCCACCCCTGGTGGTGCCCTTCCGTCAATTTCTTTAAGTTTCAGCCTTGCGACCATACTCCCCCTGGAGCCCAAGCACTTTGATTTCTCGTAAGGTGCCGAACGCGTCAAAAATGTAACATCGCCCGATCCCTAGTCGGCATAGTTTACTGTTAAGACTACAACGGTATCTGATCGTTTTCGATCCCCTAACCTTCGTTCTTGATTAATGAAAACATCCTTGGCAAATGCTTTCGCAATAGTCAGTCTTCGGTCAATCCAAGAATTTCACCTCTAGCGACCGAATACTAATGCCCCCAACTGTCCCTATTAATCATTACGGCGACTCTAGAAACCAACAAAATAGAACCGCGCGTCCTATTTCATTATT…	DQ831017	360	6.65318e-151	0.94	1	406	17	16	12	18	27	10	106	35	0	3	21	35	39	26	83	6	6	0	1	32	12	11	69	38	38	11	5	3
S1196_0346	Ascomycota	Saccharomycetes	CCCCGTGTTGAGTCAAATTAAGCCGCAGGCTCCACTCCTGGTGGTGCCCTTCCGTCAATTCCTTTAAGTTTCAGCCTTGCGACCATACTCCCCCCAGAACCCGTACACTTTGATTTCTCGTAAGATGCCGAGCGAGTCAAAAAAGAACATCGCCCGATCTCTAGTCGGCATAGTTTATGGTTAAGACTACGACGGTATCTGATCGTCTTCGATCCCCTAACTTTCGTTCTTGATTAATGAAAACATCCTTGGCAAATGCTTTCGCAGTAGTTAGTCTTCAATAAATCCAAGAATTTCACCTCTGACAATTGAATACTGATGCCCCCGACTGTCCCTATTAATCATTACGACGGTCCTAGAAACCAACAAAATAGAACCATACA	KC254863	365	3.79273e-153	0.97	1	382	0	7	5	0	0	0	0	0	0	0	0	0	0	0	0	0	0	4	0	0	1	1	1	2	0	4	0	0
S1196_0348	Chytridiomycota	Chytridiomycetes	CCCCGTGTTGAGTCAAATTAAGCCGCAGGCTCCACTCCTGGTGGTGCCCTTCCGTCAATTCCTTTAAGTTTCAGCCTTGCGACCATACTCCCCCCGGTACCCAAAGACTTTGATTTCTCATAAGGTGCCGAATGATTCATAGAATGATCATCCGATCCCTAGTCGGCATAGTTTATGGTCAAGACTACGACGGTATCTGATCGTCTTCGATCCCCTGACTTTCGTTCTTGATTAATGAAAACATCCTTGGCAAATGCTTTCGCAGAAGTTAGTCTTTCATAAATCCAAGAATTTCACCTCTGACAATTAAATACTAATGCCCCCAACTATCCCTATTAATCATTACTCCGGTCCTAGAGACCAACAAAATAGAACCAAAG	DQ536484	352	2.15647e-147	0.96	1	380	8	12	1	0	0	0	0	0	0	1	10	0	0	1	0	0	0	0	0	0	0	0	0	0	0	0	0	0
S1196_0349	Basidiomycota	Agaricomycetes	CCCCGTGTTGAGTCAAATTAAGCCGCAGGCTCCACACCTGGTGGTGCCCTTCCGTCAATTCCTTTAAGTTTCAGCCTTGCGACCATACTCCCCCCAGAACCCAAAGACTTTGATTTCTCGTAAGGTTCCGAGCGACACATCAATGTGAGATCGCCCGATCCCTAGTCGGCATAGTTTACTGTTAAGACTACAACGGTATCTGATCGTTTTCGATCCCCTAACCTTCGTTCTTGATTAATGAAAACATCCTTGGCAAATGCTTTCGCAGAAGTTCGTCTTCGGCCAATCCAAGAATTTCACCTCTAGCAGCCGAATACGAATGCCCCCAACCGTCCCTATCAATCATTACGGCGACTCTAGAAACCAACAAAATAGAACCGCACGTCCTATTCCATTATT…	DQ521416	377	1.96602e-158	0.96	1	407	43	589	24	126	550	444	45	3	0	222	40	66	5263	1132	218	344	269	79	149	55	316	81	56	106	74	165	93	22
S1196_0352	Basidiomycota	Fungi_other	CCCTGTGTTGAGTCAAATTAAGTCGCAGGCTCCCCTCAAGGTGGTGCCCTTCCATCAATTCCTTTAAGTTTTAGCCTTGTGACCATACTCCCCCCAGAACCCAAAGACTTTGATTTCTTGTAAGGTGCCGAGCGACACATAAAATTGAGGTTACCCGATCCCTAGTTGGCATAGTTTACTGTTAAGACTACAACGGTATCTGATCGTTTTTGATCCCCTAACCTTCGTTCTTGATTAATGAGAACATCTCTGGCAAATGCTTTCGCAATAGTTAGTCTTTTAGTAAATCCAAAAATTTTACCTCTAGCAACTGAATACTAATGCCCCCAACTGTCCCTATTAATCATTACGGCGACTCTAGAAACCAACAAAATAGAACCGCACG	DQ915454	343	2.12391e-143	0.94	1	385	0	0	0	0	0	0	0	0	0	0	0	0	0	0	0	0	0	0	0	0	68	0	0	0	0	13	0	0
S1196_0354	Ascomycota	Fungi_other	CCCCGTGTTGAGTCAAATTAAGCCGCAGGCTCCACTCCTGGTGGTGCCCTTCCGTCAATTTCTTTAAGTTTCAGCCTTGTGACCATACTCCCCCTGGAGCCCAAACACTTTGATTTCTCGTAAGATGCCAAACGCGTCAACAAAATAACATCGTCTGATCTCTAGTCGGCACAGTTTATGGTTAAGACTACGACGGTATCTGATCGTCTTCGATCCCCTAACTTTCGTTCACTGATTAATGAAAACATCCTTGGCAAATGCTTTCGCAGTAGTTAGTCTTCAATAAATCCAAGAATCTCACCTCTGACAATTGAATACTGATGCCCCCGACTATCCCTATTAATCATTACGGCGGTCCTAGAAACCAACAAAATAGAACCACGCG	GQ249954	357	1.33478e-149	0.96	1	385	0	0	0	0	0	0	0	0	0	0	0	0	0	0	0	0	2	0	0	0	0	0	2	12	0	5	0	0
S1196_0358	Glomeromycota	Glomeromycetes	TCCCATGTTGAGTCAAATTAAGCCGCAGGCTCCACCCCTGGTGGTGCCCTTCCATCAATTCCTTTAAGTTTTAGCCTTGCGACCATATTTCCCCGGAACCCAAACACTTTGGTTTCCCATAAGGCGCTGAATGAGTTATTAAAAAAATTAACATCATCCGATCCCTAGTCGGCATAGTTTATGGTTAAGACTACGACGGTATCTAATCATCTTCGATCCCCTAACTTTCGTTCTTGATTAATGAAACATCCTTGACAAATGCTTTCGCAGTAGTTAGTCTTCAATAAATCCAAGAATTTCACCTCTGACAATTAAATACTAATGCCCCCAACTATCCCTATTAATCATTACGTCAATCCTAGAAAACCAACAAAATAGAATCGAAACGTCCTATTCCAT…	AY903702	363	3.15477e-152	0.95	2	410	0	0	0	0	0	0	0	0	0	0	0	9	0	0	0	0	0	0	0	0	0	0	0	0	0	0	0	0
S1196_0359	Basidiomycota	Agaricomycetes	CCCCGTGTTGAGTCAAATTAAGCCGCAGGCTCCACACCTGGTGGTGCCCTTCCGTCAATTCCTTTAAGTTTCAGCCTTGCGACCATACTCCCCCCAGAACCCAAAGACTTTGATTTCTCATAAGGTGCCGAATGACTCATCATATTCTGAGGTCACCCGATCCCTAGTCGGCATCGTTTACTGTTAAGACTACAACGGTATCTGATCGTTTTCGATCCCTTAACCTTCGTTCTTGATTAATGAAAACATCCTTGGCAAATGCTTTCGCAGTAGTTGGTCTTGAGTCAATCCAAGAATTTCACCTCTAGCGACTCAATACCAATGCCCCCAACTATCCCTATTAATCATTACGGCAATTCTAGAAACCAACAAAATAGAACCACACG	DQ851575	361	2.26356e-151	0.97	2	386	14	111	0	1	0	1	2	13	0	6	143	50	1	1601	0	0	156	55	212	0	19	0	0	0	0	0	9	0
S1196_0362	Chytridiomycota	Fungi_other	CCCCGTGTTGAGTCAAATTAAGCCGCAGGCTCCACTCCTGGTGGTGCCCTTCCGTCAATTCCTTTAAGTTTCAGCCTTGCGACCATACTCCCCCCGGAACCCAAAAACTTTGATTTCTCTCAAGGTGCCAAGCGACTCAATGAAATTGTAGTCCGCCTGATCCCTAGTCGGCATAGTTTATGGTTGAGACTACGACGGTATCTAATCATCTTCGATCCCCCAACTTTCGTCCTTGATCAATGGGAATGTCCTTGGCAAATGCTTTCGCAGAAGTTAGTCTTTCATAAATCCAAGAATTTCACCTCTGACAATTAAATACTAATGCCCCCAACCATCCCTATTTATCATTACTCTGGTCCTGAAAACCAACAAAATAGAACCAAAG	AY987439	325	1.99886e-135	0.92	1	385	0	0	0	0	0	0	3	0	0	0	0	4	0	0	0	0	0	0	0	0	0	2	0	4	0	0	0	0
S1196_0363	Ascomycota	Pezizomycetes	CCCCGTGTTGAGTCAAATTAAGCCGCAGGCTCCACTCCTGGTGGTGCCCTTCCGTCAATTCCTTTAAGTTTCAGCCTTGCGACCATACTCCCCCCAGAACCCAAAGACTTTGATTTCTCGTAAGGTGCCGAGCGACACATAAATTTGAGTTCGCCCGATCCCTAGTCGGCATAGTTTATGGTTAAGACTACGACGGTATCTGATCGTCTTCGATCCCCTAACTTTCGTTCACTGATTAATGAAAACATCCTTGGCAAATGCTTTCGCAGTAGTTAGTCTTCAATTAATCCAAGAATTTCACCTCTGACAATTGAATACTGATGCCCCCGACTATCCCTATTAATCATTACGGCGGTCCTAGAAACCAACAAAATAGAACCACACG	U62009	367	4.96144e-154	0.97	1	385	344	233	660	616	286	724	376	33	0	327	218	1389	2749	104	143	623	17	35	176	689	625	966	215	541	121	707	37	156
S1196_0364	Ascomycota	Sordariomycetes	CCCCCGTGTTGAGTCAAATTAAGCCGCAGGCTCCACCCCTGGTGGTGCCCTTCCGTCAATTTCTTTAAGTTTCAGCCTTGCGACCATACTCCCCCCGGAACGCAGAGACTTTGCTTTCGCGTAAGGTGCTGAACGAGTCAACAAATAACATCGTCCAATCCCTAGTTCGCATAGTTTATGGTTAAGACTACGACGGTATCTGATCGTCTTCGATCCCCTAACTTTCGTTCCTGATTAATGAAAACATCCTTGGCAAATGCTTTCGCAGTAGTTAGTCTTCGATAAATCCAAGAATTTCACCTCTGACAATCGAATACTGATGCCCCCGACTGTCCCTATTAATCATTACGGCGGTCCTAGAAACCAACAAAATAGAACCGCACG	AF515370	359	1.73039e-150	0.96	2	384	0	0	0	22	1	4	0	0	0	0	0	1	1	5	0	0	73	0	0	0	0	1	0	0	0	0	0	3
S1196_0365	Ascomycota	Sordariomycetes	CCCCGTGTTGAGTCAAATTAAGCCGCAGGCTCCACTCCTGGTGGTGCCCTTCCGTCAATTTCTTTAAGTTTCAGCCTTGCGACCATACTCCCCCAGGAACTCAGAAACTTTACTTTCGTGTAAGGTGCCGAACGGGTCAAAATGTAACCACGTCCGAACCCTAGTCAGCATAGTTTATGGTTAAGACTACGACGGTATCTGATCGTCTTCGATCCCCTAACTTTCGTTCCTGATTAATGAAAACATCCTTGGCGAATGCTTTCGCAGTAGTTAGTCTTCAATAAATCCAAGAATTTCACCTCTGACAATTGAATACTGACGCCCCCGACTGTCCCTATTAATCATTACGGCGGTCCTAGAAACCAACAAAATAGAACCACACG	DQ643760	356	3.67938e-149	0.96	1	383	19	5	0	0	0	1	0	0	0	0	0	0	0	0	0	0	0	0	0	0	0	0	0	28	5	3	0	0
S1196_0367	Chytridiomycota	Chytridiomycetes	CCCCGTGTTGAGTCAAATTAAGCCGCAGGCTCCACTCCTGGTGGTGCCCTTCCGTCAATTCCTTTAAGTTTCAGCCTTGCGACCATACTCCCCCCGGAACCCAAAAACTTATGATTTCTCCTAAGGTGCCCAACGAGTCATGAAATATAACATCGTCGGATCCCTAGTCGGCATAGTTTATGGTTGAGACTACGACGGTATCTAATCGTCTTCGATCCCCCAACTTTCGTTCTTGATTAATGAAAACATCCTTGGCAAATGCTTTCGCAGAAGTTCATCTTTCATAAATCCAAGAATTTCACCTCTGACAATTAAATATGAATGCCCCCAACTGTCCCTATTAATCATTACCTTAGTTCTAGAAACCAACAAAATAGAACCAAAG	JN020240	343	2.12391e-143	0.95	1	385	0	0	0	0	0	0	0	1	0	19	1	0	0	0	0	0	0	0	0	0	0	0	0	0	0	0	0	0
S1196_0369	Basidiomycota	Agaricomycetes	CCCCATGTTGAGTCAAATTAAGCCACAGGCTCCACACCTGGTGGTGCCCTTCCATCAATTCCTTTAAGTTTCAGCCTTGCGACCATACTCCCCCCAGAACCCAAAGACTTTGATTTCTCGTAAGGTGCCGAGCGACACATAATAATTGAGATCGCCCAATCCCTAGTCGGCATAGTTTACTGTTAAGACTACAATGGTATCTAATCATTTTCGATCCCCTAACCTTCATTCTTGATTAATGAAAACATCCTTGGCAAATGCTTTCACAATAGTTGGTCTTGAGTCAATCCAAGAATTTCACCTCTAGCAACTCAATACCAATGCCCCCAACTATCCCTATTAATCATTACGGCGACTCTAGAAACCAACAAAATAGAACCGCACA	HQ728539	364	1.05815e-152	0.97	1	384	0	0	0	0	5	0	0	0	0	0	0	15	16	0	0	1	0	0	0	0	1	5	0	0	0	0	1	0
S1196_0370	Neocallimastigomycota	Neocallimastigomycetes	CCCCGTGTTGAGTCAAATTAAGCCGCAGGCTCCACGCCTTGTGGTGCCCTTCCGTCAATTCCTTTAAGTTTCAGCCTTGCGACCATACTCCCCCCGGAACCCAAAAACTTTGATTTCTCACAAGGTGCTGACAGAGTCTATAATTCAACATCTGCCAATCCCTAGTCGGCATAGTTTATGGTTAAGACTACGACGGTATCTGATCGTCTTCGATCCCCTAACTTTCGTTCTTGATTAATGAAAACATCCTTGGCAAATGCTTTCGCAGAAGTTAGTCTTTCATATATCCAAGAATTTCACCTCTGACAATTAAATACTAATGCCCCCAACTATCCCTATTAATCATTACTTCGGTCCTAGAAACCAACAAAATAGAACCAAAG	FJ848516	355	1.02037e-148	0.96	1	383	0	0	0	0	0	0	0	0	0	0	0	0	0	0	0	0	3	0	0	0	1	0	0	0	0	0	0	0
S1196_0371	Ascomycota	Fungi_other	CCCCGTGTTGAGTCAAATTAAGCCGCAGGCTCCACTCCTGGTGGTGCCCTTCCGTCAATTCCTTTAAGTTTCAGCCTTGCGACCATACTCCCCCCAGAACCCAAAAACTTTGATTTCTCGTAAGGTGCCGAACGAGCGCTTCTAGCTCGCCCGATCCCTAGTCGGCATAGTTTATGGTTAAGACTACGACGGTATCTAATCGTCTTCGATCCCCTAACTTTCGTTCTTGATTAATGAAAACATCCTTGGCAAATGCTTCCGCAGTAGTTAGTCTTCAATAAATCCAAGAATTTCACCTCTGACAATTGAATACTAATGCCCCCAACTGTCCCTATTAATCATTACAAATGACCTCGCAACCAACGAAACGACAGCCCTCG	KC254863	321	1.16449e-133	0.94	1	368	8	0	0	0	0	0	0	0	0	0	0	0	0	0	0	0	0	0	0	0	0	0	0	0	0	0	0	0
S1196_0373	Basidiomycota	Agaricomycetes	CCCCGTGTTGAGTCAAATTAAGCCGCAGGCTCCACACCTGGTGGTGCCCTTCCGTCAATTCCTTTAAGTTTCAGCCTTGCGACCATACTCCCCCCAGAACCCAAAGACTTTGATTTCTCGTAAGGCGCCGAGCAACACATCATTAAGAGTTCGCCCGATGCCTAGTCGGCATAGTTTACTGTTAAGACTACAACGGTATCTGATCGTTTTCGATCCCCTAACCTTCGTTCTTGATTAATGAAAACATCCTTGGCAAATGCTTTCGCAATAGTTCATCTTCAGTCAATCCAAGAATTTCACCTCTAGCGACTGAATATGAATGCCCCCAACTATCCCTATTAATCATTACGGCAGCTCTAAAAACCAACAAAATAGAACTACACA	DQ444862	371	8.36334e-156	0.98	1	383	5	36	2	7	10	1097	10	0	0	8	7	145	63	154	0	12	913	0	20	7	68	31	3	574	10	11	5	0
S1196_0374	Glomeromycota	Glomeromycetes	CCCCGTGTTGAGTCAAATTAAGCCGCAGGCTCCACACCTGGTGGTGCCCTTCCGTCAATTCCTTTAAGTTTCAGCCTTGCGACCATACTCCCCCCAGAACCCAAAGACTTTGATTTCTCATAAGGTGCCAAACAAGTCAAAAATCCTTGTCTGATCCCTAGTCGGCATAGTTTATGGTTAAGACTACGACGGTATCTGATCGTCTTCGATCCCCTAACTTTCGTTCTTGATTAATGAAAACATCCTTGGCAAATGCTTTCGCAGAAGTTAGTCTTTCATAAATCCAAGAATTTCACCTCTGACAATTAAATACTAATGCCCCCAACTATCCCTATTAATCATTACTTCGGTCCTAGAAACCAACAAAATAGAACCAAAG	AF229771	366	1.35111e-153	0.98	1	379	20	3	10	8	36	5	21	0	0	2	11	67	620	73	6	20	18	1	4	1	39	17	3	3	1	10	1	1
S1196_0375	Basidiomycota	Agaricostilbomycetes	CCCCGTGTTGAGTCAAATTAAGCCGCAGGCTCCACCCCTTGTGGTGCTCTTCCGTCAATTCCTTTAAGTTTCAGCCTTGCGACCATACTCCCCCCCGAACCTTACTCAAAGATTTCTCTTTAGGTGCCGAATGAGTCATAGCTGATGCTCATCCGATCCCTAGTCGGCATCGTTTACTGTCAAGACTACAACGGTATCTAATCGTTTTCGATCCCCTGACCTTCGTTCTTGATCAATGAAAGCGTCCTTGGCAAATGCTTTCGCAGTAGTTTGTCTTCCGTAAATCCAAGAATTTCACCTCTAGCAACGGAATACAAATGCCCCCAACCGCCCCTATTCATCATTACGGCGATCCTAGAAACCAACGCAAACAGGACCGCATCG	DQ198791	353	7.87094e-148	0.96	1	384	4	0	4	2	0	0	7	0	0	0	0	0	0	0	0	0	0	0	0	0	0	0	0	0	8	0	1	4
S1196_0377	Ascomycota	Archaeorhizomycetes	CCCCGTGTTGAGTCAAATTAAGCCGCAGGCTCCACGCCTGGTGGTGCCCTTCCGTCAATTTCTTTAAGTTTCAGCCTTGCGACCATACTCCCCCCCGAGCCCAAAAACTTTGATTTCTCATAAGGTGCCGAGCGAGTCAATTTAAACTGCACCCGATCCCTAGTCGGCATAGTTTATGGTTAAGACTACGACGGTATCTAATCGTCTTCGATCCCCTAACTTTCGTTCTTGATTAATGAAAACATCCTTGGCAAATGCTTTCGCAGTAGTTAGTCTTCAATAAATCCAAGAATTTCACCTCTGACAATTGAATACTAATGCCCCCAACTATCCCTATTAATCATTACGGCGGTCTTAGAAACCAACAAAATAAGATCGACG	GU479760	341	1.6138e-142	0.95	1	378	106	7	0	1	0	3	0	0	0	0	397	5	2	0	1	0	1	1	50	0	0	0	1	1	0	3	1	0
S1196_0378	Ascomycota	Eurotiomycetes	CCCCGTGTTGAGTCAAATTAAGCCGCAGGCTCCACGCCTGGTGGTGCCCTTCCGTCAATTTCTTTAAGTTTCAGCCTTGCGACCATACTCCCCCCAGAACCCAAAAACTTTGATTTCTCGTAAGGTGCCGAACGGGTTATAAAAAAAGCCCCGTCCGATCCCTAGTCGGCATAGTTTATGGTCATGACTACGACGGTATCTGATCGTCTTTGCTCCCATGACTTTCGTTCACTGATTAATGAAAACATCCTTGGCGAATGCTTTCGCAGTAGTTAGTCTTCGGCTAATCCAAGAATTTCACCTCTGACAGCCGAATACTGACGCCCCCAACTATCCCTATTAATCATTACGGCGGTTCTAGAAACCAACAAAATAGAACCACGCG	FJ358347	357	1.33478e-149	0.96	1	385	2	0	0	2	0	0	0	0	0	0	1	1	0	0	0	0	0	0	0	0	0	0	0	0	0	3	0	0
S1196_0380	Basidiomycota	Fungi_other	CCCTGTGTTGAGTCAAATTAAGCTGCAGGCTCCACTCCTGGTGGTGCCCTTCTGTTAATTCCTTTAAGTTTCAGCCTTGCGACCATACTCCCCCCAGAACCCAAAGACTTTGATTTCTCATAAGGTGCCAAACAATGCATAATATTAAGGTCATCCGATCCCTAGTTGGCATAGTTCACTGTTAAGACTACAATGGTATCTGATTGTTTTCGATCCTCTAACCTTTATTCTTGATTAATAAAAATATCCTTGGCAAATGCTTTCGCAATAGTTTGTCTTGCATAAATCCAAGAATTTCACCTCTAGCAATGCAATACAAATGCCCCCAACTATCCCTATTAATCATTATGGCAACTCTAGAAACCAACAAAATAGAACTGCACA	U59093	331	4.38122e-138	0.93	1	381	0	0	82	0	0	0	0	0	0	0	0	0	0	0	0	0	0	0	0	0	0	0	0	0	0	0	0	0
S1196_0381	Chytridiomycota	Chytridiomycetes	CCCCGTGTTGAGTCAAATTAAGCCGCAGGCTCCACTCCTGGTGGTGCCCTTCCGTCAATTCCTTTAAGTTTCAGCCTTGCGACCATACTCCCCCCGGAACCCAAAAACTTTGATTTCTCGTAAGGTGCTGAACAAGTCAATAAATATAACGTTGTCCAATCCCTAGTCGGCATAGTTTATGGTTAAGACTACGACGGTATCTGATCGTCTTCGATCCCCTAACTTTCGTTCTTGATTAATGAAAACATCCTTGGCAAATGCTTTCGCAGAAGTTAGTCTTTCATAAATCCAAGAATTTCACCTCTGACAATTAAATACTAATGCCCCCAACTATCCCTATTCTATTATTCCATGCTAA	AY987439	325	1.83679e-135	0.97	1	341	2	0	0	1	1	0	0	0	0	0	3	2	2	1	0	0	2	0	0	0	0	0	0	1	0	1	0	0
S1196_0382	Entomophthoromycota	Entomophthoromycetes	TCCCGTGTTGAGTCAAATTAAGCCGCAGGCTCCACTCCTGGTGGTGCCCTTCCGTCAATTCCTTTAAGTTTCAGCCTTGCGACCATACTCCCCCCGGAACCCAAAAACTTTGATTTCTCATAAGGTGCCAAGCCTTCTTTAAAAGGCCTGATCCCTAGTCGGCATAGTTTATGGTTGAGACTACGACGGTATCTAATCATCTTCGATCCCCCAACTTTCGTTCTTGATCAATGGGAATGTCCTTGACAAATGCTTTCGCAGAAGTTAGTCTTTCATAAATCCAAGAATTTCACCTCTGACAATTAAATACTAATGTCCCCAACCACCCCTATTCATCATTACTTTGGTTCTATAACCAACAAAATAGATCCAAAG	AF368510	375	1.3757e-157	1	1	375	0	0	0	0	0	0	0	0	0	0	0	0	0	0	0	0	2	0	0	0	0	0	0	0	0	0	0	0
S1196_0383		Fungi_other	TCCCGTGTTGAGTCAAATTAAGCCGCAGGCTCCACTCCTGGTGGTGCCCTTCCGTCAATTCCTTTAAGTTTCAGACTTGCGACCGTAATTCCCCCAGAACCCAAAAACTTTGATTTCTCATACGGTGCCGATGGAGACATTAATTATACTCCACCGATCCCGAGTCGGCATAGTTTATGGTTAAGACTACGACGGTATCTAATCGTCTTCGATCCCTAACTTTCGTTCTTGATTAATGAAAACATCCTTGACAAATGCTTTCGCAGTAGTTAGTCTTTCAGCAATCCAAGAATTTCACCTCTGACACTGAAATACTAATGTCCCCAACTGTCCCTATTAATCATTACCTTGGTCCTAGAAACCAACAAAAT	EU154974	317	6.69842e-132	0.93	2	371	2	0	0	0	0	1	0	0	0	0	16	0	0	0	0	0	0	0	7	1	0	4	2	0	0	3	0	0
S1196_0384	Chytridiomycota	Fungi_other	CCCCGTGTTGAGTCAAATTAAGCCGCAGGCTCCACTCCTGGTGGTGCCCTTCCGTCAATTCCTTTAAGTTTCAGCCTTGCGACCGTACTCCCCCCGGAACCTAAAAACTTTGATTTCTCATAAGGTGCCAAAGATGTCATAAAAATAACAACCTCTGATCCCTAGTCGGCATAGTTTATGGTTAAGACTACGACGGTATCTGATCGTCTTCGATCCCCTAACTTTCGTTCTTGATTAATGAAAACATCCTTGACAAATGCTTTCGCAGAAGTTAGTCTTTCGCAAATCCAAGAATTTCACCTCTGACTGCGGAATACTAATGTCCCCAACTGTCCCTATTAATCATTACTCTTCAATCGCAACCAACAAAATAAACAAAGAGTCCTATTTCATTATTCC…	DQ536492	334	2.18419e-139	0.91	1	405	0	0	0	0	0	0	0	0	0	0	0	12	0	0	0	0	0	0	0	0	0	0	0	0	0	0	0	0
S1196_0385		Fungi_other	TCCCGTGTTGAGTCAAATTAAGCCGCAGGCTCCACGCCTTGTGGTGCCCTTCCGTCAATTTCTTTAAGTTTCAGCCTTGCGACCATACTCCCCCCTATAAAATAGAAACGTTAGCAAATAGAAATTAAAACCGAAAAAGGGATGAGAAACCAAAACTTACCAGAGCCCAAACACTTTGATTTCTCGTAAGGTGCCGAACGGGTCATATAAAAAACGCCGTCCGATCCCTAGTCGGCATAGTTTATGGTTAAGACTACGACGGTATCTGATCGTCTTCGATCCCCTAACTTTCGTTCTTGATTAATGAAAACATCCTTGGCAAATGCTTTCGCAGAAGTTAGTCTTTCATAAATCCAAGAATTTCACCTCTGACAATTAAATACTAATGCCCCCAACTAT…	JQ301627	316	2.26813e-131	0.88	2	443	0	0	0	8	0	0	0	0	0	0	0	0	0	0	0	0	0	0	0	0	0	0	0	0	0	0	0	0
S1196_0388	Basidiomycota	Agaricomycetes	CCCCGTGTTGAGTCAAATTAAGCCGCAGGCTCTACACCTGGTGGTGCCCTTCTGTTAATTTCTTTAAGTTTCAGCCTTGCGACCATACTCCCCCCAGAACCCAAAGACTTTGATTTCTCGTAAGGTGCTGAGCAACACATCAAAATTAAGGTTGCCCAATCCCTAGTTAGCATAGTTTACTGTTAAGACTACAACGGTATCTGATTGTTTTCGATCCCCTAACCTTCGTTCTTGATTAATGAAAACATCCCTGGCAAATACTTTCGCAGTTGTTGGTCTTGAGTTAATCCAAGAATTTTACCTCTAGCAACTCAATACCAATGCCCCTAACTATCCCTATTAATCATTACGGCGACTCTAGAAACTAACAAAATAGAACCGCACG	AF287833	347	3.59099e-145	0.95	1	385	0	0	0	0	14	1	0	0	0	0	0	0	0	0	0	0	0	0	0	0	0	0	0	0	0	0	0	0
S1196_0389	Basidiomycota	Fungi_other	CCCTGTGTTGAGTCAAATTAAGCCGCAGGCTCCACACCTAGTAGTGCTCTTCCGTTAATTTCTTTAAGTTTCAGCCTTGCGACTATACTCCCCCCAGAACCCAAAGACTTTGATTTCTCGTAAGGTGCCGAGCAACACATCAAAATTAAGGTTGCCCAATCCCTAGTTAGCATAGTTTACTGTTAAGACTACAACAGTATCTGATTGTTTTCGATCCCCTAACCTTTGTTCTTGATTAATGAAAACATCCTTGGCAAATGCTTTTGTAGTTGTTAGTCTTGAGTTAATCCAAGAATTTTACCTCTAGCGACTCAATACCAATGCGCCCAACTATCCCTATTAATCATTACAGCTACTCTAGAAACCAACAAAATAGAACCACACG	AF287833	335	7.42984e-140	0.93	1	385	0	0	0	0	0	4	0	0	0	0	0	0	0	0	0	0	0	0	0	0	0	0	0	0	0	0	0	0
S1196_0390	Ascomycota	Laboulbeniomycetes	CCCCGTGTTGAGTCAAATTAAGCTGCAGGCTCCACGCCTGGTGGTGCCCTTCCGTCAATTTCTTTAAGTTTCAGCCTTGCGACCATACTCCCCCCAGAACCCAAAAACTTTGATTTCTCGTAAGGTGCTGAGTGGGTCATAGTGAACACACCACCCAATCCCTAGTCGGCATAGTTTACGGTTAAGACTACGACGGTATCTGATCGTCTTCGATCCCCTAACTTTCGTTCCTGATTAATGAAAACATCTTTGGCAAATGCTTTCGCAGTAGTTAGTCTTCAATAAATCCAAGAATTTCACCTCTGACAATTGAATACTGATGCCCCCAACTATCCCTATTAATCATTACGGCGGTCCTAGAAACCAACAAAATAGAACCACACG	FJ176839	368	1.7837e-154	0.97	1	384	0	3	0	0	0	0	0	0	0	0	0	0	0	0	0	0	0	0	0	0	0	0	1	0	0	0	0	0
S1196_0391	Ascomycota	Fungi_other	TCCCGTGTTGAGTCAAATTAAGCCGCAGGCTCCACTCCTGGTGGTGCCCTTCCGTCAATTCCTTTAAGTTTCAGCCTTGCAACCATACTCCCCCCAGAACCCAAAAACTTTGATTTCTCATACGGTGCCAATGGATACATAAATCATATTCCACTGATCCCGAGTCGGCATAGTTTATGGTTAAGACTACGACGGTATCTAATCGTCTTCGATCCCCTAACTTTCGTTCTTGATTAATGAAAACATCCTTGGCAAATGCTTTCGCAGTAGTTAGTCTTCAATAAATCCAAGAATTTCACCTCTGACAATTGAATACTAATGCCCCCAACTATCCCTATTAATCATTACGGCGGTCTTAGAAACCAACAAAATAAGATCGACG	GU324001	328	9.28777e-137	0.93	2	379	0	0	0	0	2	0	0	0	0	0	4	0	0	0	0	0	0	0	0	0	0	0	0	0	0	0	0	0
S1196_0392	Chytridiomycota	Chytridiomycetes	CCCCGTGTTGAGTCAAATTAAGCCGCAGGCTCCACTCCTGGTGGTGCCCTTCCGTCAATTCCTTTAAGTTTCAGCCTTGCGACCATACTCCCCCCGGTACCCAAAGACTTTGATTTCTCATAAGGTTCCGAACGAGATAAAATATCCACGTCCGATCCCTAGTCGGCATAGTTTATGGTCAAGACTACAACGGTATCTGATCGTTTTCGATCCCCTGACTTTCGTTCTTGATTAATGAAAACATCCTTGGCAAATGCTTTCGCAGAAGTTAGTCTTTCATAAATCCAAGAATTTCACCTCTGACAATTAAATACTAATGCCCCCAACTATCCCTATTAATCATTACTTCGGTCCTAGAAACCAACAAAATAGAACCAAAG	JN020240	353	7.77611e-148	0.96	1	380	0	0	0	0	4	0	0	0	0	0	1	0	0	0	0	0	1	0	0	1	0	6	1	0	0	0	0	0
S1196_0395	Glomeromycota	Fungi_other	TCCTATGTTGAGTCAAATTAAGCCACAAGCTCCACCCCTGGTGGTGCCCTTCTGTCAATTCCTTTAAGTTTCAGCCTTGCAACCATACTCCCCCGGAACCCAAACACTTTGGTTTTCAAATGAGTCATTAAAAAAATTAACATCATCTGATCCCTAATTGGCATAGTTTATGATTAAGATTACAACGATATCTGATCGTCTTCGACCCCCTAACTTTCATTCTTGATTAATGAAAACATCTTTGGCAAATGCTTTCGCAGTAGTTAATCTTCAATAAATCCAAGAATTTCACTTCTGACAATTGAATACTAATGCCACCAACTATCCCTATTAATCATTACATCGATCCTAGAAACCAACAAAATAAAATTAACGTCCTATTTTATTATTCCACGCTAA	AY903709	309	2.54891e-128	0.9	6	399	0	0	0	0	0	0	0	0	0	0	0	0	0	0	0	0	6	0	0	1	2	0	0	0	0	0	0	0
S1196_0397	Basidiomycota	Agaricomycetes	CCCCGTGTTGAGTCAAATTAAGCCGCAGGCTCCACTCCTGGTGGTGCCCTTCCGTCAATTCCTTTAAGTTTCAGCCTTGCGACCATACTCCCCCCAGAACCCAAAGACTCTGATTTCTCGCAGGGTGCCGAGCGCCACATCAAAGAGAGTTCGCCCGATCCCCGGTCGGCATAGTTTACTGTTAAGACTACAACGGTATCTGATCGTTTTCGATCCCCTAACCTTCGTCCTTGATTAATGAAAACATCCTTGGCAAATGCTTTCGCAGTAGTCAGTCTTCGGTCGATCCAAGAATTTCACCTCTAGCGACCGAATACTAATGCCCCCAACTGTCCCTATTAATCATTACGGCGACTCCAGAAACCAACGAAATAGAACCGCACG	GU187653	380	8.62097e-160	0.99	1	384	0	0	0	2	12	0	0	0	0	0	0	0	0	0	0	0	0	0	0	0	0	0	0	0	0	0	0	0
S1196_0399	Basidiomycota	Fungi_other	CCCTGTGTTGAGTCAACTCAAGCCACAGATGGTGCCCTTCCATCAATTCCTTTAAGTTTCAGCCTTGCGACCATACTCCCCCAGAACACAAAGACTTTGATTTCTCATAAGGTGCCGAGTGACACATAATTATTTGTTTTGCCTGATCCCTAGTTGGCATAGTTTACTGTTAAGACTACGACAGTATCTGATTGTTTTCAATCCCCTAACCTTCATTCTTGATTAATGAAAACATCCTTGGCAAATGCTTTTGCAGTAGTTGGTCTTAAGTCAATCCAAGAATTTCACCTCTAGCAACTCAATACCAATGCCCCCAACTATCCCTATTAATAATTATGGCAACTCATAGAAACCAACAAAATAGAACCACATGTCCTATTTCATTATTCCATGCTA	KJ417175	310	9.11177e-129	0.92	30	396	0	0	0	0	0	0	0	0	0	0	0	0	0	0	0	0	0	0	0	0	0	0	0	14	0	0	0	0
S1196_0400	Basidiomycota	Agaricomycetes	CCCCGTGTTGAGTCAAATTAAGCCGCAGGCTCCACACCTGGTGGTGCCCTTCCGTCAATTCCTCCAGGCTCCACACCTGGTGGTGCCCTTCCGTCAATTCCTTTAAGTTTCAGCCTTGCGACCATACTCCCCCCAGAACCCAAAGACTTTGATTTCTCGTAAGGTGCCGAGCAACACATCATAATTGAGGTTGCCCGATCCCTAGTCGGCATAGTTTACTGTTAAGACTACAACGGTATCTGATCGTTTTCGATCCCCTAACCTTCGTTCTTGATTAATGAAAACATCCTTGGCAAATGCTTTCGCAATAGTTGGTCTTGAGTCAATCCAAGAATTTCACCTCTAGCGACTCAATACCAATGCCCCCAACTATCCCTATTAATCATTACGGCGACTCTA…	KJ137260	360	6.99147e-151	1	65	424	0	12	0	0	0	0	0	0	0	0	0	0	0	0	0	0	0	0	0	0	0	0	0	0	0	0	0	0
S1196_0401	Chytridiomycota	Chytridiomycetes	CCCCGTGTTGAGTCAAATTAAGCCGCAGGCTCCACTTCTGGTGGTGCCCTTCCGTCAATTCCTTTAAGTTTCAGCCTTGCGACCATACTCCCCCCAGAACCCAAAAACTTTGATTTCTCATAAGGTGCCGACGGAGTCATCTAAATAACATCCGCCGATCCCTAGTCGGCATAGTTTATGGTTAAGACTACGACGGTATCTGATCGTCTTCGATCCCCTAACTTTCGTTCTTGATTAATGAAAACATCCTTGGCAAATGCTTTCGCAGAAGTTAGTCTTTCATAAATCCAAGAATTTCACCTCTGACAATTAAATACTAATGCCCCCAACTATCCCTATTAATCATTACTTCGGTCCTAGAAACCAACAAAATAGAACCAAAGTCCTATTTCATTATTC…	JN020240	384	1.55418e-161	0.97	1	406	0	0	0	5	0	0	3	2	0	0	1	4	0	1	0	0	0	0	0	0	0	1	0	0	1	2	0	0
S1196_0404	Cryptomycota	Cryptomycota	TCCCGTGTTGAGTCAAATTAAGCCGCAGGCTCCACTCCTGGTGGTGCCCTTCCGTCAATTCCTTTAAGTTTCGGCCTTGCGACTATACTCCCCCCAGAACCCAAAAGCTTTGATTTCTCTCAAGGTGCCGATCACGTCAATAAAGACATTGACCGATCCCTAGCTGGCATCGTTTATGGTTAAGACTACGACGGTATCTGATCGTCTTCGATCCCCTAACTTTCGTTCTTGATTAATGAAAACATCCTTGGCAAATGCTTTCGCAGTAGTTAGTCTTCAGTAAATCCAAGAATTTCACCTCTGACTACTGAATACTAATGCCCCCAACTGTCCCTATTCATCATGACATTGGTCCTTAAAACCAACAAAATAGAACCAAAG	AF372713	326	7.12122e-136	0.93	1	381	0	0	0	0	0	0	5	0	0	0	4	0	0	0	0	9	0	0	2	2	7	1	0	0	0	0	0	0
S1196_0405	Basidiomycota	Cystobasidiomycetes	CCCCGTGTTGAGTCGAATTAAGCCGCAGGCTCCACACCTGGTGGTGCCCTTCCGTCAATTCCTTTAAGTTTCAGCCTTGCGACCATACTCCCCCCCGAACCTAAACTTAAAGATTTCTCTTCAGGTGCCGAACGAGTCATAAAGAATTCTCGTCCGATCCCTAGTCGGCATAGTTTACTGTTAAGATTACAACGGTATCTGATCGTCTTTACTCCCCTAACCTTCGTTCTTGATCAATGAAAACATCCTTGGCAAATGCTTTCGCAGTAGTTCGTCTTCAATAAATCCAAGAATTTCACCTCTAGCAATTGAATACGAATGCCCCCAACTATCCCTATTAATCATTACGGCGATCCTTAAGACCAACACAATAGAACCGCACGTCCTATTTCATTATTC…	JQ627510	374	4.18123e-157	0.96	1	406	0	14	0	0	0	0	0	0	0	0	0	0	0	0	0	0	0	0	0	0	0	0	0	0	0	0	0	0
S1196_0407	Ascomycota	Fungi_other	CCCCGCGTTGAGTTAAATTAAGCCGCAGGCTCCACGCCTGGTGGTGCCATTCCGTCAATTTCTTTAAGTTTCAGCCTTGCGACCATACTCCCCCCAGAACCCAAAAACTTTGATTTCTCGTAAGGTGCCGAAGAGGTCAAATAAAATAAACGCCCTCCGATCCCTAGTCGGCATAGTTTACGGTTAAGACTACGACGGTATCTGATCGTCTTCGATCCCCTAACTTTCGTTCCTGATCAATGAAAACATCCCTGACGAATGCTTTCGCAGTAGTTGGTCTTTAGCAAATCCAAGAATTTCACCTCTGACAGCTAAATACCGACGTCCCCGACTGTCCCTTTTAATCATTACGGCGGTCCTAGAAACCAACAAAATAGAACCGCAAACGTCCTATTCCAT…	KP115833	354	3.06049e-148	0.93	1	410	0	3	8	0	0	2	2	0	0	0	0	0	0	2	0	0	0	0	0	0	0	0	0	0	0	0	1	0
S1196_0408	Glomeromycota	Glomeromycetes	CCCCGTGTTGAGTCAAATTAAGCCGCAGGCTCCACTCCTGGTGGTGCCCTTCCGTCAATTCCTTTAAGTTTCAGCCTTGCGACCATACTCCCCCCGGTACCCAAAGACTTTGATTTCTCATAAGGTGCCAAACAAGTCATAATATCCTTGTCTGATCCCTAGTCGGCATAGTTTATGGTCAGGACTACAACGGTATCTGATCGTTTTCGATCCCCTGACTTTCGTTCTTGATCAATGAAGGCATCCTGGATCGAATGCTTTCGCAGAAGTTAGTCTTTCTTAAATCCAAGAATTTCACCTCTGACAATTGAATACTGACGCCCCCGACTATCCCTATTAATCATTACAGCGGTCCTAGAAACCAACAAAATAGAACCGATG	AF229771	327	2.56787e-136	0.93	1	377	3	12	2	1	0	0	0	0	0	0	19	0	1	2	4	7	1	0	0	0	6	2	5	0	0	5	0	0
S1196_0410	Basidiomycota	Agaricomycetes	CCCCGTGTTGAGTCAAATTAAGCTGCAGGCTCCACGCCTGGTGGTGCCCTTCCGTCAATTCCTTTAAGTTTCAGCCTTGCGACCATACTCCCCCCAGAACCCAAAGACTTTGATTTCTTGTAAGGTGCTGAGTGACACATGATAGTGAGATCACCTGATCCCTAGTTGGCATAGTTTACTGTTAAGACTACAACAGTATCTGATCGTTTTCGATCCCCTAACCTTCGTTCTTGATTAATGAAAACATCCTTGGCAAATGCTTTCACAGAAGTTAGTCTTCCATAAATCCAAGAATTTCACCTCTAGCAACGGAATACTAATGCCCCCAACTATCCCTATTAATCATTACAGCGACTCTAGAAACCAACAAAATAGAACCGCACG	DQ457627	358	4.79871e-150	0.96	1	384	0	0	0	0	0	0	0	0	0	0	0	0	0	0	0	0	0	45	0	0	0	0	0	0	0	0	0	0
S1196_0412	Chytridiomycota	Chytridiomycetes	CCCCGAGTTGAGTCAAATTAAGCCGCAGGCTCCACTCCTGGTGGTGCCCTTCCGTCAATTCCTTTAAGTTTCAGCCTTGCGACCATACTCCCCCCAGAACCCAAAAACTTTGATTTCTCACAAGGTGCCGAGCGCGTCTCAAAAAGAAATACACTGCCCGATCCCTAGTCGGCATAGTTTATGGTTAAGACTACGACGGTATCTGATCGTCTTCGATCCCCTAACTTTCGTTCTTGATTAATGAAAATGTCCTTGGCAAATGCTTTCGCAGTAGTTGGTCTTTAATAAATCCAAGAATTTCACCTCTGACAATTAAATACCAATGCCCCCAACCATTCCTATTAATCATTACTCTGGTCCTAGAAACCAACAAAAATAGAACCAGCA	DQ643792	327	2.61471e-136	0.93	1	384	0	0	0	0	0	0	0	0	0	4	0	0	0	4	0	0	0	0	0	0	0	0	0	0	0	0	0	0
S1196_0413	Basidiomycota	Agaricomycetes	CCCTGTGTTGAGTCAAATTAAGCTGCAGGCTCCATGCCTGGTGGTGCCCTTCTGTCAATTCCTTTAAGTTTCAGCCTTGCAACCATACTCCCCCCAGAACCCAAAGACTTTGATTTCTTGTAAGGTGCCGAGCGACACATGATAGTGAGATCGCCCGATCCCTAGTCGGCATAGTTTACTGTTAAGACTACAATGGTATCTGATCGTTTTCGATCCCCTAACCTTTGTTCTTGATTAATGAAAACATCCTTGGCAAATGCTTTCACAGAAGTTAGCCTTCCGTAAATCCAAGAATTTCACCTCTAGCAATGGAATACTAATGCCCCCAACTATCCCTATTAATCATTATGGTGACTCTAGAAACCAACAAAATAGAACCGCATG	DQ457627	352	2.18276e-147	0.96	1	382	0	0	0	0	5	0	0	0	0	0	0	0	0	0	0	0	0	0	0	0	0	0	0	0	0	0	0	0
S1196_0414	Ascomycota	Fungi_other	CCCCGTGTTGAGTCAAATTAAGCCGCAGGCTCCACGCCTGGTGGTGCCCTTCCGTCAATTTCTTTAAGTTTCAGCCTTGCGACCATACTCCCCCTACACAAAACAGTTAGCAATGATTTCAAGATCCCTCAGAAAGGATGGAACTCACCCAGAACCCAAAAACTTTGATTTCTCGTAAGGTGCCGAGTGAGTCATAAAAGGAACACCACCCGATCCCTAGTCGGCATAGTTTACGGTTAAGACTACGACGGTATCTGATCGTCTTCGATCCCCTAACTTTCGTTCACTGATTAATGAAAACATCTTTGGCAAATGCTTTCGCAGTAGTTAGTCTTCAATAAATCCAAGAATTTCACCTCTGACAATTGAATACTGATGCCCCCAACTATCCCTATTAAT…	JQ301627	358	5.60813e-150	0.91	1	440	0	0	0	0	15	0	0	0	0	0	0	10	0	0	0	0	0	0	0	0	0	0	0	0	0	0	0	0
S1196_0416	Chytridiomycota	Chytridiomycetes	TCCCGTGTTGAGTCAAATTAAGCCGCAGGCTCCACTCCTGGTGGTGCCCTTCCGTCAATTCCTTTAAGTTTCAGCCTTGCGACCATACTCCCCCCGGAACCCAAAAACTTTGATTTCTCATAAGGTGCCGATGGAGTCAAAAAAATAACACCACCGATCCCTAGTCGGCATCGTTTATGGTTAAGACTACGACGGTATCTGATCGTCTTCGATCCCCTAACTTTCGTTCTTGATTAATGAAAACATCCTTGGCAAATGCTTTCGCAGAAGTTAGTCTTTCATAAATCCAAGAATTTCACCTCTGACAATTAAATACTAATGCCCCCAACTATCCCTATTAATCATTACTTCGGTCCTAGAAACCAACAAAATAGAACCAAAGTCCTATTTTATTATTCC…	DQ643792	387	7.26659e-163	0.98	2	405	4	0	0	0	0	15	0	0	0	0	0	6	0	1	0	1	4	3	0	0	0	0	0	3	2	0	0	0
S1196_0425	Basidiomycota	Agaricostilbomycetes	CCCCGTGTTGAGTCAAATTAAGCCGCAGGCTCCACTCCTGGTGGTGCCCTTCCGTCAATTCCTTTAAGTTTCAGCCTTGTGACCGTACTCCCCCACGAACCGCACTCAAGGTTTCCCTTTGGCTGCTGAAGAGGTCATTAAAAAAACCCTCTCCAATCGCCCGTTGGCATAGTTTACTGTCGAGACTACAACGGTATCTAATCGTTTTCGATCCCCCGACCTTCGTTCTTGATCAATGAAAGCGTCCTTGGCAAATGCTTTCGCAGTAGTTTGTCTTCAATAAATCCAAGAATTTCACCTCTAGCAATTGAATACAAATGCCCCCGAACCGCCCCTATTTCTCATTAAGGTGCCTCTAAAAGACCAATAGAGGCACACA	D64118	359	1.70433e-150	0.97	1	379	1	0	0	0	0	0	8	0	0	0	0	0	0	0	0	0	0	0	0	0	0	0	0	0	0	0	0	0
S1196_0428	Kickxellomycota	Kickxellomycetes	TCCCGTGTTGAGTCGAATTGAGCCGCAGGCTCCACTCCTGGTGGTGCCCTTCCGTCAATTCCTTTAAGTTTCAGCCTTGCGACCATACTCCCCCCGGAACCCAAAAACTTTGATTTCTCATACGGTGCCAGGCAAGTCTTTAATTATAACATTACCTGATCCCGAGTCGGCATAGTTTATGGTTAAGACTACGACGGTATCTAATCGTCTTCGATCCCCTAACTTTCGTTCTTGATTAATGAAAACATCCTTGGCAGACGCTTTCGCATCAGTTTGTCTGGCATTGGTTCAAGTATTTCACCACTGACAACGCCATACAAATGCCCCCAACTGTCCCTATTAATCATTACCTCGGTTCTGAAAACCAACAAAATAGAACCAAAGTCCTATTCCATTATT…	JN940700	400	1.27362e-168	0.99	1	407	0	0	0	0	0	0	0	0	0	0	0	0	9	0	0	0	0	0	0	0	0	0	0	0	0	0	0	0
S1196_0432	Basidiomycota	Agaricostilbomycetes	CCCCGTGTTGAGTCAAATTAAGCCGCAGGCTCCACACCTGGTGGTGCCCTTCCGTCAATTCCTTTAAGTTTCAGCCTTGCGACCATACTCCCCCCCGAACCTCATTTAAAGATTTCTCTTCGGGTGCTAACTCAGTCATTAAAAATCCTGAGCTAATCCCCAATTGGCATAGTTTACAGAAGAGACTACAACGGTATCTGATCGTTTTCGATCCCCCTTCCTTCGTTCTTGATCAATGAAAACATCCTTGGCAAATGCTTTCGCAATAGTTTGTCTTCCGGCAATCCAAGAATTTCACCTCTGACGACGGAATACAAATGCCCCCAACTATCCCTATTAATCATTACGGCGATCTCAGAAACCAACAAAATGGGAACGCGCG	DQ789983	380	8.56904e-160	0.99	1	382	45	3	7	5	3	1	6	0	0	0	33	5	7	33	34	36	85	57	144	6	48	29	6	49	49	52	0	0
S1196_0433	Entomophthoromycota	Entomophthoromycetes	CCCCGTGTTGAGTCAAATTAAGCCGCAGGCTCCACTCCTGGTGGTGCCCTTCCGTCAATTCCTTCAAGTTTCAGCCTTGCGACCATACTCCCCCCGGAACCTAAAAACTTTGATTTCTCGCAAGGTGCCGATCAAGTCCTAAAACATCGACCGATCCCTAGTCGGCATAGTTTATGGTTGAGACTACGACGGTATCTGATCGTCTTCGATCCCCCAACTTTCGTTCTTGATTAATGAAAACATCCTTGACAAATGCTTTCACACTAGTTAGTCTTTAATAAATCCAAGAATTTCACCTCTGACAATTAAATACTAATGCCCCCAACTATCCCTATTAATCATTACGGTTGTCTAGAAACCAATAAATTAGACCTCCG	AF368505	321	1.15383e-133	0.93	1	371	0	0	0	0	0	0	0	0	0	0	0	0	0	0	0	0	0	0	0	0	0	0	0	15	0	0	0	0
S1196_0435	Basidiomycota	Agaricomycetes	CCCCGTGTTGAGTCGAATTAAGCCGCAGGCTCCACTCCTGGTGGTGCCCTTCCGTCAATTCCTTTAAGTTTCAGCCTTGCGACCATACTCTCCCCAGAACCCAAAGACTTTGATTTCTCGTAAGGTGCCGAGTGACACATAAAAGTGAGGTCACCCGATCCCTAGTCGGCATAGTTTACTGTTAAGACTACAACGGTATCTAATCGTTTTCGATCCCCTAACCTTCGTTCTTGATTAATGAAAACATCCTCGGCAAATGCTTTCGCAGTAGTTAGTCTTCAGTAAATCCAAGAATTTCACCTCTAGCAACTGAATACTAATGCCCCCAACTATCCCTATTAATCATTACGGCGATCCTAGAAACCAACAAAATAGGACCGCACA	U59064	374	3.92138e-157	0.98	1	383	1507	4	5	42	4	140	13	13	0	119	54	128	1	8	13	51	2	70	55	30	82	200	12	33	44	85	1	15
S1196_0436	Ascomycota	Archaeorhizomycetes	CCCCGTGTTGAGTCAAATTAAGCCGCAGGCTCCACTCCTGGTGGTGCCCTTCCGTCAATTCCTTTAAGTTTCAGCCTTGCGACCATACTCCCCCCAGAACCCAAAAACTTTGATTTCTCTTAAGGTGCCGAGCGAGTCGTTTGAACTGCGCCCGATCCCTAGTCGGCATAGCTTATGGTTAAGACTACGACGGTATCTAATCGTCTTCGATCCCCTAACTTTCGTTCTTGATTAATGAAAACATCCTTGGCAAATGCTTTCGCAGTAGTTAGTCTTCAATAAATCCAAGAATTTCACCTCTGACAATTGAATACTAATGCCCCCAACTATCCCTATTAATCATTACGGCGGTCCTAGAAACCAACAAAATAGGATCGACG	AY124370	343	2.09202e-143	0.96	1	372	49	51	0	53	285	30	8	1	0	0	290	528	117	937	8	3	216	12	171	21	54	2	19	26	11	21	394	448
S1196_0437	Ascomycota	Eurotiomycetes	CCCCGTGTTGAGTCAAATTAAGCCGCAGGCTCCACGCCTTGTGGTGCCCTTCCGTCAATTTCTTTAAGTTTCAGCCTTGCGACCATACTCCCCCCCGAGCCCAAAAACTTTGATTTCTCGTAAGGTGCTAAATGGGGCAAATAAAACCACCATCTAATCCCTAGTCGGCATAGTTTATGGTTAAGACTACGACGGTATCTGATCGTCTTCGATCCCCTAACTTTCGTTCACTGATTAATGAAAACATCCTTGACGAATGCTTTCGGAGTAGTTAGTCTTCAATTGATCCAAGAATTTCACCTCTGACAATTGAATACTGACGCCCCCGACTGACCCTATCAATCATTACAGCGGTCCTATAAACCAACAAAATAGAACCGATGTCCTATTTTATTATTC…	FJ358312	371	8.91754e-156	0.95	1	406	0	0	0	0	0	0	0	0	0	12	0	0	7	0	0	0	0	0	0	0	0	0	0	0	0	0	0	0
S1196_0439	Ascomycota	Fungi_other	CCCCGTGTTGAGTCAAATTAAGCCGCAGGCTCCACTCCTGATGGTGCCCTTCCGTCAATTCCTTTAAGTTTCAGCCTTGCGACCATACTCCCCCCAGAACCCAAAGACTTTGATTTCTCGTAAGGTGCTGAGCGAGTCAGAATAAAACATTACTTAATCCCTAGTTGGCATAGTTTATAGTTAAGACTATGATGGTATCTAATCGTCTTCGATCCCCTAACTTTCGTTCGCTGATTAATGAAAACATCCTTGGCAAATGCTTTCGCAGAAGTTAGTCTTTCATAAATCCAAGAATTTCACCTCTGACAATTAAATACTAATGCCCCCAACTATCCCTATTAACCATTACCAGGTTCAACAAACCAACAAAAGTAGAACCAAAG	U42658	319	9.03751e-133	0.92	1	379	0	0	0	0	0	2	0	0	0	0	0	0	0	0	0	0	0	0	0	0	0	0	0	0	0	0	0	0
S1196_0440	Blastocladiomycota	Blastocladiomycetes	CCCCGTGTTGAGTCAAATTAAGCCGCAGGCTCCACTCCTGGTGGTGCCCTTCCGTCAATTCCTTTAAGTTTCAGCCTTGCGACCATACTCCCCCCAGAACCCAAAAACTTTGATTTCTCAAAAGGTGCTCGATGAGTCTTAATAAAAACTACATCATCGAATCCCTGGTCGGCATCGTTTATGGTTAAGACTACGATGGTATCTAATCATCTTCGATCCCTTAACTTTCGTTCTTGATTAATGAAAACATCCTTGGCAAATGCTTTCGCAGAAGTTAGTCTTTCCTAAATCCAAGAATTTCACCTCTGACAATTAAATACTAATGCCCCCAACTATCCCTATTAATCATTACTCTTGTCCTAGAAACCAACAAAATAGAAAAAGAG	AY821992	352	2.19591e-147	0.96	1	380	0	0	0	0	0	0	0	0	0	0	0	0	0	0	0	0	3	0	0	0	0	0	0	0	0	0	0	2
S1196_0441	Glomeromycota	Glomeromycetes	CCCCGTGTTGAGTCAAATTAAGCCGCAGGCTCCACCCCTTCCGTCAATTCCTTTAAGTTTCAGCCTTGCGACCATACTCCCCCCGGAACCCAAACACTTTGGTTTCCCGTAAGGCGCCGAATGAGTCATTAAAAAATTAACATCATCCGATCCCTAGTCGGCATAATTTATGGTTAAGACTACGACGGTATCTGATCGTCTTCGATCCCCTAACTTTCGTTCTTGATTAATGAAAACATCCTTGGCAAATGCTTTCGCAGTAGTTAGTCTTCAATAAATCCAAGAATTTCACCTCTGACAATTGAATACTAATGCCCCCAACTATCCCTATTAATCATTACGTCAATCCTAGAAACCAACAAAATAGGATCGTTACG	AB555671	347	3.50472e-145	0.96	1	372	0	14	1	0	0	0	0	0	0	0	0	0	0	0	0	0	0	0	0	0	0	0	0	0	0	0	0	0
S1196_0442	Chytridiomycota	Chytridiomycetes	CCCCGTGTTGAGTCAAATTAAGCCGCAGGCTCCACTCCTGGTGGTGCCCTTCCGTCAATTCCTTTAAGTTTCAGCCTTGCGACCATACTCCCCCCGGTACCCAAAGACTTATGATTTCTCATAAGGTGCCAAACGTGTCATAAAATAACACGCCTGATCCCTAGTCGGCATAGTTTACGGTCAGGACTACGACGGTATCTGATCATCTTCGATCCCCTGACTTTCGCTCTTGATTAATGAAAACATCCTTGGCAAATGCTTTCGCAGAAGTTAGTCTTTGATAAATCCAAGAATTTCACCTCTAGCTATTAAATACTAATGCCCCCAACTATCCCTATTAATCATTACTTCGGCCCTAGAAACCAACAAAATAAAACCAAAG	DQ536483	358	4.7698e-150	0.97	1	382	0	0	0	0	0	0	0	0	0	0	1	0	0	4	1	2	0	13	0	0	0	0	0	0	0	0	0	0
S1196_0444	Basidiomycota	Agaricomycetes	CCCCGTGTTGAGTCAAATTAAGCCGCAGGCTCCACACCTGGTGGTGCCCTTCCATCAATTCCTTTAAGTTTCAGCCTTGTGACCATACTCCCCCCAGAACCCAAAGACTTTGATTTCTCGTAAGGTGCCAAGCGACACATAATAATTGAGGTCACCCGATCCCTAGTCGGCATAGTTTACTGTTAAGACTACAACGGTATCTAATCGTTTTCGATCCCCTAACCTTCATTCTTGATTAATGAAAACATCCTTGGCAAATGCTTTCGCAATAGTTGGTCTTGAGTCAATCCAAGAATTTCACCTCTAGCGACTCAATACCAATGCCCCCAACTATCCCTATTAATCATTACAGCAACTCTAGAAACCAACAAAATAGAATCACACG	DQ457623	369	6.45129e-155	0.97	1	385	2	5	4	1	15	37	1	0	0	1	2	2	22	6	0	11	10	0	3	2	11	1	1	3	3	3	0	5
S1196_0449	Basidiomycota	Agaricomycetes	CCCCGTGTTGAGTCAAATTGAGCCGCAGGCTCCACACCTGGTGGTGCCCTTCCGTCAATTCCTTTAAGTTTCAGCCTTGCGACCATACTCTCCCCAGAGCCCAAAGACTTTGATTTCTCGTAAGGTGCTGAGCAACACATTGAAAAGAGTTTGCCCAATCCCTAGTCGGCATAGTTTACTGTTAAGACTACAACGGTATCTGATCGTTTTCGATCCCCTAACCTTCGTTCTTGATTAATGAAAACATCCTTGGCAAATGCTTTCGCAGTAGTTCATCTTCAGTCAATCCAAGAATTTCACCTCTAGCGACTGAATATGAATGCCCCCAACTATCCCTATTAATCATTACGGCAGCTCTAAAAACCAACAGAATAGAACCACACG	DQ444862	358	4.79871e-150	0.96	1	384	0	0	0	0	0	0	0	0	0	0	0	0	17	0	0	0	0	0	0	0	0	0	0	0	0	0	0	0
S1196_0450	Glomeromycota	Glomeromycetes	CTCCGTGTTGAGTCAAATTAAGCCGCAGGCTCCACCCCTGGTGGTGCCCTTCCGTCAATTCCTTTAAGTTTCAGCCTTGCGACCATACTCCCCCCGGAACCCAAACACTTTGGTTTTCCGTAAGATGCCGAATGAGTCATTAATTTAACATCATCCGATCCCTAGTCGGCATAGTTTATGGTTAAGACTACGACGGTATCTGATCGTCTTCGATCCCCTAACTTTCGTTCTTGATTAATGAAAACATCCTTGGCAAATGCTTCCGCAGTAGTTAGTCTTCAATAAATCCAAGAATTTCACCTCTGACAATTGAATACTAATGCCCCAACTATCCCTATTAATCATTACGTCGATCCTAGAAACCAACAAAATAGAACCACACGTCCTATTCCATTATTC…	AY903709	378	7.0694e-159	0.97	3	406	0	0	0	0	0	0	0	0	0	0	0	8	0	0	0	0	0	0	0	0	0	0	0	0	0	0	0	0
S1196_0451	Basidiomycota	Fungi_other	CCCCGTGTTGAGTCAAATTAAGCCGCAGGCTCCACTCCTGGTGGTGCCCTTCCGTCAATTCCTTTAAGTTTCAGCCTTGTGACCATACTCCCCCACGAACCTCACTCTAGATTTCTCTTTGGGTGCCGATCTGATCATATAATGATATCAAGACCGATCCCCCGTTGGCATAGTTTACTGTCGAGACTACAACGGTATCTAATCGTTTTCGATCCCCCGACCTTCGTTCTTGATCAATGAAAGCGTCCTTGGCAAATGCTTTCGCAGTAGTTAGTCTTCAATAAATCCAAGAATTTCACCTCTAGCAATTGAATACTAATGCCCCCGAGCCGCCCCTATTTCTCATTAAGGTACCTCTAAAAGACCAATAGAGGCACACA	JN020243	332	1.56081e-138	0.93	1	380	0	0	0	0	3	0	0	0	0	0	0	6	3	0	0	0	0	0	0	0	0	0	0	0	0	0	0	0
S1196_0453	Basidiomycota	Fungi_other	CCTTGTGTTGAGTCAAATTAAGCTGCAGGCTCCACACCTGGTGGTGCCCTTCCATCAATTCCTTCAAGTTTCAGCCTTGTGACCATACTCCCCCAGAACCCAAAGACTTTGATTTCTTGTAAGGTGCCGAATGACACATAATAATTGCGGTCATCCGATCCCTAGTCGGCATAGTTTACTGTTAAGACTACAATAGTATCTAATCGTTTTTGATCCCCTAACCTTCATTCTTGATTAATGAAAACATCCTTAGCAAATGCTTTCACAGTAGTTGGTCTTGAGTCAATCCAAGAATTTCACTTCTAGTGACTCAATACCAATGCCCCCAACTATCCCTATTAATCATTACGGCAACTCTAGATACTAACAAAATAGAACTGCATG	AF287835	337	9.63191e-141	0.94	5	382	0	0	0	0	0	0	0	0	0	0	0	0	10	0	0	0	0	0	0	0	0	0	0	0	0	0	0	0
S1196_0456	Basidiomycota	Tremellomycetes	CCCCGTGTTGAGTCAAATTAAGCCGCAGGCTCCACTCCATGGTGGTGCCCTTCCGTCAATTCCTTTAAGTTTCAGCCTTGCGACCATACTCCCCCCAGAACCCTACTTATGATTTCTCGCAAGGTGCCGAGCGAGTCAAGAACAAACATCGCCCGATCCCTGGTCGGCATAGTTTATGGTTAAGACTACGACGGTATCTGATCGTCTTCGATCCCCTAACCTTCGTTCTTGATTAATGAAAACATCCTTGGCAAATGCTTTCGCAGTAGTTAGTCTTCAGTAAATCCAAGAATTTCACCTCTAGCAACTGAATACTAATGCCCCCAACTATCCCTATTAATCATTACGGCGACTCTAGAAACCAACAAAATAGAACCGCACG	DQ831017	342	5.83695e-143	0.95	1	382	0	0	0	0	1	0	0	0	0	0	0	5	0	0	0	1	0	0	4	0	2	0	1	3	0	0	0	0
S1196_0459	Glomeromycota	Glomeromycetes	CCCCGTGTTGAGTCAAATTAAGCCGCAGACTCCACCCCTGGTGGTGCCCTTCCATCAATTCCTTTAATTTTCAGCCTTGTGACCATACTCTCCCCGGAACCCAAACACTTTGGTTTTCCATAAGGCGTCGAATGAGTCATTAAAAATAACATCATCCGATCCCTAGTCGGCATAGTTTATGGTTAAGACTACGACGGTATCTGATCGTCTTCGATCCCCTAACTTTCGTTCTTGATTAATGAAAACATCCTTGGCAAATGCTTTCGCAGTAGTTAGTCTTCAATAAATCCAAGAATTTCACCTCTGACAATTGAATACTAATGCCCCCAACTATCCCTATTAATCATTACATCGATCCTAGAAACCAACAAAATAGGATTAACGTCCTATTTCATTATT…	EU169391	379	2.53479e-159	0.97	1	404	0	0	0	0	0	0	0	0	0	0	0	0	0	1	0	0	17	0	0	0	1	0	0	0	0	0	0	0
S1196_0461	Basidiomycota	Agaricomycetes	CCCCGTGTTGAGTCAAATTAAGCCGCAGGCTCCACACCTGGTGGTGCCCTTCCGTCAATTCCTTTAAGTTTCAGCCTTGCGACCATACTCCCCCCAGAACCCAAAGACTTTGATTTCTCGTAAGGTGCTGAATGATACATCATAAAAGAGTTCATCCAATCCCTAGTCGGCATAGTTTACTGTTAAGACTACAACGGTATCTGATCGTTTTCGATCCCCTAACCTTCGTTCTTGATTAATGAAAACATCCCTGACAAATGCTTTCGCAATAGTTGGTCTTGAGTCAATCCAAGAATTTCACCTCTAGCGACTCAATACCAATGCCCCCAACTATCCCTATTAATCATTACGGCGACTCTAGAAACCAACAAAATAGAACCACACG	KF381540	367	4.96144e-154	0.97	1	385	0	0	0	0	0	0	0	0	0	0	0	8	0	2	2	5	4	0	0	0	0	0	0	0	0	0	0	0
S1196_0463	Ascomycota	Saccharomycetes	CCCCGTGTTGAGTCAAATTAAGCCGCAGGCTCCACTCCTGGTGGTGCCCTTCCGTCAATTCCTTTAAGTTTCAGCCTTGCGACCATACTCCCCCCAGAACCCAAAAACTTTGATTTCTCGTAAGGTGCTGGGCGCGTCATATTCATGAGGCGTCGCCCAATCCCTAGTCGGCATAGTTTATGGTTAAGACTACGACGGTATCTGATCATCTTCGATCCCCTAACTTTCGTTCTTGATTAATGAAAACGTCCTTGACAAATGCTTTCGCAGTAGTTAGTCTTCAGAAAATCTAAGAATTTCACCTCTTACAACTGAATACTAATGCCCCCGACCGTCCCTATTAATCATTACGATGGTCCTAGAAACCAACAAAATAGAATCATCG	FJ176820	381	3.11804e-160	0.99	1	385	0	0	0	0	0	2	0	0	0	0	3	0	0	0	0	0	0	0	0	1	0	0	0	0	0	0	0	1
S1196_0464	Ascomycota	Orbiliomycetes	CCCCGTGTTGAGTCAAATTAAGCCGCAGGCTCCACATCTGGTGGTGCCCTTCCGTCAATTCCTTTAAGTTTCAGCCTTGCGACCATACTCCCCCCAGAACCCAAAGACTTTGATTTCTCGTAATGTGCCGAAGGAGTCATGAATCTAACACCCTCCGATCCATAGTCGGCATAGTTTATGGTTAAGACTACGACGGTATCTGATCGTCTTCGATCCCCTAACTTTCGTTCACTGATTAATGAAAACATCCTTGGCAAATGCTTTCGCAGTAGTTCGTCTTCAATAAATCCAAGAATTTCACCTCTGACAATTGAATACGGATGCCCCCGACTATCCCTATTAATCATTACGGTGGCTCTAGAAACCAACAAAATAGAACCGCCG	EF053556	360	6.2397e-151	0.96	1	384	4	0	0	0	0	0	0	0	0	1	0	0	0	0	0	0	0	0	0	0	0	0	0	0	0	0	0	0
S1196_0466	Basidiomycota	Fungi_other	CCCCGTGTTGAGTCAAATTAAGCCGCAGGCTCCACTCCTGGTGGTGCCCTTCCGTCAATTCCTTTAAGTTTCAGCCTTGCGACCATACTCCCCCCAGAACCCAAAGACTTTGATTTCTCGTAAGATGACGTGGACCGATCCCTAGTCGGCATAGTTTACTGTTAAGACTACAACGGTATCTAATCGTTTTTGATCCCCTAACCTTCGTTCTTGATCAATGAAAACGTCCTTGGCAAATGCTTTCGCAGAAGTTAGTCTTCCGTAAATCTAAGAATTTCACCTCTAGCAACGGAATACTAATGCCCCCGACCGTCCCTATTAATCATTACGGCGATCCTAGAAACCAACAAAATAGAACCGCACG	EF053565	320	3.07182e-133	0.94	1	364	0	0	1	1	0	0	0	0	0	0	2	1	0	1	5	0	0	0	0	0	0	0	1	1	0	1	0	0
S1196_0467	Chytridiomycota	Chytridiomycetes	CCCCGTGTTGAGTCAAATTAAGCCGCAGGCTCCACTCCTGGTGGTGCCCTTCCGTCAATTCCTTTAAGTTTCAGCCTTGCGACCATACTCCCCCCAGAACCTAAAAACTTTGATTTCTCATAAGGTGCCGAACGGGTCAATAAAATAACGCCGTCCGATCCCTAGTTGGCATAGTTTATGGTTAAGACTACGACGGTATCTGATCGTCTTCGATCCCCTAACTTTCGTTCTTGATTAATGAAAACATCCTTGGCAAATGCTTTCGCAGAAGTTAGTCTTTCATAAATCCAAGAATTTCACCTCTGACAATTAAATACTAATGCCCCCAACTATCCCTATTAATCATTACCTTGGTCCTAGAAACCAACAAAATAGAACCAAAGTCCTATTCCATTATTC…	JN020240	388	2.62772e-163	0.97	1	406	115	0	194	1144	0	1318	0	772	10	1557	179	0	0	72	0	14	29	0	20	0	0	1	0	0	136	17	0	282
S1196_0468	Basidiomycota	Agaricomycetes	CCCCCGTGTTGAGTCAAATTAAGCCGCAGGCTCCACTCCTGGTGGTGCCCTTCCGTCAATTCCTTTAAGTTTCAGCCTTGCGACCATACTCCCCCCAGAACCCAAAGACTTTGATTTCTCGTAAGGTGCCGAACGACGCATAATATTGAGGTCGTCCGATCCCTAGTCGGCATAGTTTACTGTTAAGACTACAACGGTATCTGATCGTTTTCGATCCCCTAACCTTCGTTCTTGATTAATGAAAACATCCTTGGCAAATGCTTTCGCAATAGTTTGTCTTGCGTAAATCCAAGAATTTCACCTCTAGCAACGCAATACAAATGCCCCCAACTATCCCTATTAATCATTACGGCGACTCTAGAAACCAACAAAATAGAACCGCACG	U59093	380	8.64694e-160	0.99	2	385	157	611	3112	9966	590	676	1151	764	3	2213	1968	895	3994	47	1024	3408	105	320	545	1156	525	2561	84	1910	348	3010	137	2591
S1196_0469	Chytridiomycota	Chytridiomycetes	TCCCGTGTTGAGTCAAATTAAGCCGCAGGCTCCACTCCTGGTGGTGCCCTTCCGTCAATTCCTTTAAGTTTCAGCCTTGCGACCATACTCCCCCCGGAACCCAAAGACTTGTGATTTCTCAGTAAGGTGCCGATGGAGTCATGAAATAAAAATAACATCCACCGATCCCTAGTCGGCATAGTTTATGGTTAAGACTACGACGGTATCTGATCATCTTCGATCCCCTAACTTTCGTTCTTGATTAATGAAAACATCCTTGTGGAATGCTTTCGCAGAAGTTCGTCTTTCATAAATCCAAGAATTTCACCTCTGACAATTAAATACGAACCACCCCAACTATCCCTATTAATCATTACTTCGGTCCTAGAAACCAACAAAATAAGACCAAAG	JN020240	332	1.6084e-138	0.94	2	390	3	0	0	4	0	4	0	0	0	0	2	0	2	0	0	0	0	2	0	0	2	3	0	9	0	2	0	0
S1196_0470	Basidiomycota	Ustilaginomycetes	TCCCGTGTTGAGTCAAATTAAGCCGCAGGCTCCACTCCTGGTGGTGCCCTTCCGTCAATTTCTTTAAGTTTCAGCCTTGCGACCATACTCCCCCCAGAACCCAAAAACTTTGATTTCTCGTACCGCGCCGATCGAGCCAGTGAAATGAGCATCGACCGATTCGGAGTCGGCATAGTTTACTGTTAAGACTACAACGGTATCTAATCGTTTTCGATACCCTAACCTTCGTTCTTGATTAATGAAAACATTCTTGGCAAATGCTTTCGCAGTAGGAAGTCTTTGCACAATCCAAGAATTTCACCTCTAGCGTGCAAATACTAATGCCCCCGGCTGTCCCTTTTAATCATTACGGCAGTTCTAGAAACCAACAAAATAGAACCGCACG	DQ831012	385	5.27182e-162	1	1	385	0	0	0	0	7	0	4	0	0	0	0	0	2	1	2	0	0	0	0	0	0	3	0	0	1	0	0	0
S1196_0471	Basidiomycota	Agaricomycetes	CCCCATGTTGAGTCAAATTAAGCCGCAGGCTCCACTCCTGGTGGTGCCCTTCTGTCAATTCCTTTAAGTTTCAGCCTTGCGACCATACTCCCCCCAGATCCCAAAGACTTTGATTTCTCATAAGGTGCCGAACGACACATAATATTGAGGTTATCCAATCCCTAGTCAGCATAGTTTACTGTTAAGACTACAACAGTATCTGATCGTTTTTGATCCCCTAACCTTCGTTCTTGATTAATGAAAACATCCTTGGCAAATGCTTTCGTAGTAGTTTGTCTTGCATAAATCCAAGAATTTCACCTCTAGCAACGCAATACAAATGCCCCCAACTATCCCTATTAATTATTATGGCAACTCTAGAAACCAACAAAATAGAACTGCATG	AF082845	348	1.29101e-145	0.95	1	382	0	0	0	0	0	0	0	15	0	111	0	0	0	0	0	0	0	0	0	0	0	0	0	0	0	0	0	0
S1196_0472	Chytridiomycota	Chytridiomycetes	CCCCGTGTTGAGTCAAATTAAGCCGCAGGCTCCACTCCTTGTGGTGCCCTTCCGTCAATTCCTTTAAGTTTCAGCCTTGCGACCATACTCCCCCCGGAACCCAAAAACTTTGATTTCTCACAAGGTGCCCATGGAGTCTTGAAAAAACACCCACAGATCCCTAGTCGGCATAGTTTATGGTTAAGACTACGACGGTATCTAATCGTCTTCGATCCCCTAACTTTCGTTCTTGATTAATGAAAACATCCTTGGCAAATGCTTTCGCAGAAGTTAGTCTTCCATAAATCCAAGAATTTCACCTCTGACAATTAAATACTAATGCCCCCAACTGTCCCTATTAATCATTACCTCGGTCCTAGAAACCAACAAAATAGAACCAAAG	JN020240	347	3.55864e-145	0.95	1	382	0	0	0	0	1	8	0	0	0	1	0	0	19	0	0	0	0	0	0	0	0	0	0	0	0	0	0	0
S1196_0473	Basidiomycota	Tremellomycetes	CCCCCGTGTTGAGTCAAATTAAGCCGCAGGCTCCACACCTGGTGGTGCCCTTCCGTCAATTCCTTTAAGTTTCAGCCTTGCGACCATACTCCCCCCAGAACCCAAAGACTTTGATTTCTCGTAAGGTGCCGATCCAGTCAGAAGATGACGTGGACCGATCCCTAGTCGGCATAGTTTACTGTTAAGACTACAACGGTATCTAATCGTTTTTGATCCCCTAACCTTCGTTCTTGATCAATGAAAACGTCCTTGGCAAATGCTTTCGCAGAAGTTAGTCTTCCGTAAATCTAAGAATTTCACCTCTAGCAACGGAATACTAATGCCCCCGACCGTCCCTATTAATCATTACGGCGATCCTAGAAACCAACAAAATAGAACCGCACGTCCTATTTCATTATT…	JN939391	396	7.53287e-167	0.98	2	407	735	1806	585	821	426	107	1264	74	0	6	1383	13	20	148	3084	208	49	1013	44	202	91	276	1723	6020	2225	309	346	206
S1196_0474	Entomophthoromycota	Entomophthoromycetes	CCCCGTGTTGAGTCAAATTAAGCCGCAGGCTCCACTCCTGGTGGTGCCCTTCCGTCAATTCCTTTAAGTTTCAGCCTTGCGACCATACTCCCCCCAGAACCCAAAAACTTTGATTTCTCATACAGTGCCAGCCGGTACTAAAAAAATATCCGGCTGATCCTGAGTCGGCATAGTTTATGGTTAAGACTACGACGGTATCTAATCGTCTTCGATCCCCTAACTTTCGTTCTTGATTAATGAAAACATCCTTGGCAGATGCTTTCGCAGTAGTTAGTCTTTCAGAAATCCAAGAATTCCACCTCTGACACTGAAATACTAATGCCCCCAACTGTCCCTATTAATCATTACCTTAGTCCTAGAAACCAACAAAATAGAACCAAGATCCTATTCTATTATTCC…	AF368505	346	1.05566e-144	0.93	1	405	0	0	0	0	0	0	0	0	0	0	0	0	0	0	0	0	0	0	0	0	0	6	0	11	0	0	0	0
S1196_0476	Cryptomycota	Fungi_other	CCCCGTGTTGAGTCAAATTAAGCCGCAGGCTCCACTCCTGGTGGTGCCCTTCCGTCAATTCCTTTAAGTTTCAGCCTTGCGACCATACTCCCCCCAGAACCCAAAAACTTTGATTTCTCCCACGGTGCCGGCGGCGTCGCGAGCGACATCCGCCGATCCCGAGTCGGCAACGTTTACGGTTGTGACTACGACGGTATCTAATCGTCTTCGATCCCACAACTTTCGTTCTTGATCAATGAAAACATCCTTGGCAAATGCTTTCGCACTAGTCAGTCTTCGGTAAATCCAAGAATTTCACCTCTGACTACCGAATACTAATGCCCCCAACTGTCCCTCTTAATCATTACAACGACCCTCAAACCAACAAAATAGGATCGCCG	AF372716	309	2.40934e-128	0.91	2	374	1	0	0	0	0	0	0	0	0	0	7	0	0	2	0	0	0	0	0	0	0	0	1	1	3	5	0	0
S1196_0479	Glomeromycota	Glomeromycetes	CCCCGTGTTGAGTCAAATTAAGCCGCAGGCTCCACTCCTGGTGGTGCCCTTCCGTCAATTCCTTTAAGTTTCAGCCTTGCGACCATACTCCCCCCGGTACCCAAAGACTTTGATTTCTCATAAGGTGCCGAACAAGATATAGTATCTTTGTCCGATCCCTAGTCGGCATAGTTTATGGTCAAGACTACGACGGTATCTGATCGTCTTCGATCCCCTGACTTTCGTTCTTGATTAATGAAAACATCCTTGGCAAATGCTTTCGCAGAAGTTAGTCTTTCATAAATCCAAGAATTTCACCTCTGACAATTAAATACTAATGCCCCCAACTATCCCTATTAATCATTACTTCGGTCCTAGAAACCAACAAAATAGAACCAAAG	AF229771	354	2.80402e-148	0.96	1	380	0	1	0	0	0	0	0	0	0	0	0	3	0	0	2	0	0	0	0	0	0	3	0	0	0	0	0	0
S1196_0480	Ascomycota	Sordariomycetes	CCCCGTGTTGAGTCAAATTAAGCCGCAGGCTCCACCCCTGGTGGTGCCCTTCCGTCAATTTCTTTAAGTTTCAGCCTTGCGACCATACTCCCCCAGGAGCCCAAACATCTTGATTTCTCGTAAGGTGCCGAACGCGTCAAAAATGTAACATCGTCCGATCCCTAGTCGGCATAGTTTATGGTTAAGACTACGACGGTATCTGATCGTCTTCGATCCCCTAACTTTCGTTCCTGATTAATGAAAACATCCTTGGCAAATGCTTTCGCAGTAGTTAGTCTTCAATAAATCCAAGAATTTCACCTCTGACAATTGAATACTGATGCCCCCGACTGTCCCTATTAATCATTACGGCGGTCCTAGAAACCAACAAAATAGAACCACACG	GU199043	376	5.09892e-158	0.98	1	384	177	876	199	276	207	289	624	144	1	70	465	143	78	275	1016	186	263	88	251	83	102	196	570	1251	528	197	129	74
S1196_0481	Basidiomycota	Fungi_other	CCTGTGTTGAGTCAAATTAAGCTGCAGGCTCCACATCTGGTGGTGCCCTTCCATCAATTCCTTTAAGTTTCAGCCTTGTGACCATACTCCCCCCAGAACCAAAAAACTTTTATTTCTTGTAAGGTGCCAAGTGTCACATAATTATTGAGTTCACCTGATCCCTAGTTGGCATAGTTTACTGTTAAGACTACAATGGTATCTGATCATTTTTGATCCCCTAACCTTTGTTCTTGATTAAAACATCCTTGGTAAATGCTTTCACAGTAGTTGGTCTTGAGTTCCAAGAATTTCACCTCTAGTGACTCAATACCAATGCCTCCAACTATCCCTATTGATCATTATGGTGACTCTAGAAACCAACAAAATATAACCACACATCCTATTCTATTATTCCATGCT…	KJ417155	321	1.23904e-133	0.9	1	399	0	0	0	0	0	0	0	0	0	0	0	0	0	0	0	0	0	0	0	0	0	0	0	13	0	0	0	0
S1196_0484	Glomeromycota	Glomeromycetes	CCCCGTGTTGAGTCAAATTAAGCCGCAGGCTCCACACCTGGTGGTGCCCTTCCGTCAATTCCTTTAAGTTTCAGCCTTGCGACCATACTCCCCCCAGAACCCAAAGACTTTGATTTCTCGTAAGGTGCCGAATGACACATAATAATTAACATCATCCGATCCCTAGTCGGCATAGTTTATGGTTAAGACTACGACGGTATCTGATCGTCTTCGATCCCCTAACTTTCGTTCTTGATTAATGAAAACATCCTTGGCAAATGCTTTCGCAGTAGTTAGTCTTCAATAAATCCAAGAATTTCACCTCTGACAATTGAATACTAATGCCCCCAACTATCCCTATTAATCATTACGTCGATCCTAGAAACCAACAAAATAGGATCAAACG	AB555668	362	8.13784e-152	0.97	1	385	5	386	340	579	353	2211	242	1	0	715	49	1239	2133	6	84	1132	2	0	0	31	19	138	9	157	154	20	46	121
S1196_0485	Chytridiomycota	Chytridiomycetes	TCCCGTGTTGAGTCAAATTAAGCCGCAGGCTCCACTCCTGGTGGTGCCCTTCCGTCAATTCCTTTAAGTTTCAGCCTTGCGACCATACTCCCCCCAGAACCCAAAAACTTTGATTTCTCGTACGGTGCCAGGCAGGTCATGAATAACACTGCCTGATCCCGAGTCGGCATAGTTTATGGTTAAGACTACGACGGTATCTGATCGTCTTCGATCCCCTAACTTTCGTTCTTGATTAATGAAAACATCCTTGGCAAATGCTTTCGCATAAGTTAGTCATCCAGAAATCCAAGAATTTCACCTCTGACTCTGGAGTACTAATGCCCCCAACTGTCCCTATTAATCATTACTTTGGTTCCAAAACCAATAAAATAAAACCAAAGTCCCATTCCATTATTCCAT…	HQ901772	345	2.91927e-144	0.93	1	404	0	0	0	0	0	0	0	0	0	0	0	19	0	0	0	0	0	0	0	0	0	0	0	0	0	0	0	0
S1196_0488	Chytridiomycota	Chytridiomycetes	TCCCGTGTTGAGTCAAATTAAGCCGCAGGCTCCACTCCTGGTGGTGCCCTTCCGTCAATTCCTTTAAGTTTCAGCCTTGCGACCATACTCCCCCCGGAACCCAAAAACTTTGATTTCTCATAAGGTGCTCACAGAGTCAATGATTAACGACTGCGAATCCCTAGTCGGCATAGTTTATGGTTAAGACTACGACGGTATCTGATCGTCTTCGATCCCCTAACTTTCGTTCTTGATTAACGAAAACATTTTTGGCAAATGCTTTCGCAGAAGTTAATCTTTCATAAATCCAAGAATTTCACCTCTGACAATTAAATATTAATGCCCCCAACTATCCCTATTAATCATTATCTCGATCTTAGAAACCAACAAAATAAGACCGTGA	DQ536490	334	2.04188e-139	0.94	2	378	0	0	0	0	0	0	13	0	0	0	0	0	9	1	0	0	0	0	0	0	0	0	0	0	0	0	0	0
S1196_0490	Basidiomycota	Wallemiomycetes	CCCCGTGTTGAGTCAAATTAAGCCGCAGGCTCCACTCCTGGTGGTGCCCTTCCGTCAATTCCTTTAAGTTTCAGCCTTGCGACCATACTCCCCCCTAAGCCCAAAAACTTTGATTTCTCGCAGAGTGCTGAACAAGTCAATAATATAACGTCGTCCAATCCTCAGTCGGCATAGTTTACTGTTAAGACTACAACGGTATCTAATCATTTTCGATCCCCTAACCTTCGTCCTTTATTAATGAAAACATCCTTGGCAAATGCTTTCGCAGTAGTTAGTCTTCAGTAAATCCAAGAATTTCACCTCTAGCAACTGAATACTAATGCCCCCAACTGTTCCTATTAATCATTACGGTGGTTCTAGAAACCAACAAAATAGAATCACACGTCCTATTCCATTATT…	AY741382	401	4.56673e-169	0.99	1	405	0	0	0	0	0	0	0	0	0	0	0	0	0	4	0	3	6	0	0	0	0	0	5	0	0	0	0	0
S1196_0491	Blastocladiomycota	Blastocladiomycetes	TCCCGTGTTGAGTCAAATTAAGCCGCAGGCTCCACTCCTGGTGGTGCCCTTCCGTCAATTCCTTTAAGTTTCAGCCTTGCGACCATACTCCCCCCAGAACCCAAAAACTTTGATTTCTCAAAAGGTGCCGGATGTGTCTTACAAAGTACTACAAATCATCCGATCCCTGGTCGGCATCGTTTATGGTTAAGACTACGATGGTATCTAATCATCTTCGATCCCTTAACTTTCGTTCTTGATTAATGAAAACATCCTTGGCAAATGCTTTCGCAGAAGTTAGTCTTTCCTAAATCCAAGAATTTCACCTCTGACAATTAAATACTAATGCCCCCAACTATCCCTATTAATCATTACTCTAGTCCTAGAAACCAACAAAATAAAACCAGAGTCCTATTTCAT…	AY821992	377	1.98263e-158	0.96	2	410	0	0	0	0	9	14	0	0	0	0	0	0	0	0	0	0	0	0	0	0	4	0	0	0	0	0	0	1
S1196_0492	Chytridiomycota	Chytridiomycetes	CCCCGTGTTGAGTCAAATTAAGCCGCAGGCTCCACTCCTGGTGGTGCCCTTCCGTCAATTCCTTTAAGTTTCAGCCTTGCGACCATACTCCCCCCGGAGCCCAAAGACTCGTGATTTCTCGTGAAGTGCCGGGGGAGTCAATCCATGTAACGTCTCCCGATCCTCGGTCGGCATAGTTTATGGTTAAGACTACGACGGTATCTGATCGTCTTCGATCCCCTAACTTTCGTTCTTGATTAATGAAAACATCCTTGGCAAATGCTTTCGCAGAAGTTAGTCTTTCATAAATCCAAGAATTTCATCTCTGACAATTAAATACTAATGCCCCCAACTATCCCTATTAATCATTACTTCGTCCCTAGAAACCAACAAAATAGAAACAAAG	DQ536490	337	9.66092e-141	0.94	1	385	1	0	1	0	3	0	0	0	0	0	0	0	1	0	0	0	0	0	0	0	1	0	0	0	0	0	0	0
S1196_0493	Basidiomycota	Agaricomycetes	CCCCGTGTTGAGTCAAATTAAGCCGCAGGCTACACACCTGGTGGTGCCCTTCCGTCAATTCCGATAAGTTTCAGCCTTGCGACCATACTCCCCCCAGAACCCAAAGACTTTGATTTCTCGTAAGGTGCCGAGCGACGCATCAAAATTGAGGTCGCCCGATCCCTAGTCAGCATAGTTTACTGTTAAGACTACAACGGTATCTGATCGTTTTCGATCCCCTAACCTTCGTTCTTGATTAATGAAAACATCCTTGGCAAATGCTTTCGCAATAGTTGGTCTTGAGTCAATCCAAGAATTTCACCTCTAGCGACTCAATACCAATGCCCCCAACTATCCCTATTAATCATTACGGCGACTCTAGAAACCAACAAAATAGAACCGCACG	DQ457644	377	1.84418e-158	0.98	1	385	13	14	80	109	48	167	56	59	0	200	105	55	1680	369	2	56	10	2	8	18	419	13	6	26	0	100	9	35
S1196_0494	Ascomycota	Dothideomycetes	CCCCGTGTTGAGTCAAATTAAGCCGCAGGCTCCACCCCTGGTCTGAGAAATTGTTAGCTTGTCTTGTTTGAACTTCTATAGTTGCGTTACTTTCGTCACTTACGGTGCCCTTCCGTCAATTTCTTTAAGTTTCATCCTTGCGGACATACTCCCCCTGGAACCCAAAAACTTATGATTTCTCGTAATTCGCCGCGCAGGTCAATAAGTAACACTGCGCGATGAATGGTCGGCACAGTTTATGGTTAAGACTACGACGGTATCTATTCTAACTGTTAGCATTCTTCTTATTTTTTATTTAAGCAACAAACTTACCTGATCGTCTTCGATCCCCTAACTTTCGTTCCTGATTAATGAAAACATCCTTGGCAAATGCTTTCGCAGTAGTTAGTCTTCAATAAA…	GU561841	256	9.79057e-105	0.84	104	487	0	0	0	0	0	0	0	0	0	0	0	0	0	0	0	0	9	0	0	0	0	0	0	0	0	0	0	0
S1196_0495	Glomeromycota	Glomeromycetes	CCCCGTGTTGAGTCAAATTAAGCCGCAGGCTCCACCCCTGGTGGTGCCCTTCCGTCAACTCCTTTAAGTTTCAGCCTTGCGACCATACTCCCCCCGGAACCCAAACACTTTGGTTTCCCGTAAGGTGCCGAACGCGTCATTATAAATTAACTTCGTCCGATCCCTAGTCGGCATAGTTTATGGTTAAGACTACGACGGTATCTGATCGTCTTCGATCCCCTAACTTTCGTTCTTGATTAATGAAAACATCCTTGGCAAATGCTTTCGCAGTAGTTAGTCTTCAATAAATCCAAGAATTTCACCTCTGACAATTGAATACTAATGCCCCCAACTATCCCTATTAATCATTACGGTGATCCTAGAAACCAACAAAATAGAACCAGTCCG	EF136887	368	1.79981e-154	0.97	1	387	7	74	3	18	37	0	22	0	0	4	0	35	19	5	0	0	0	0	0	2	1	13	3	0	0	0	11	2
S1196_0497	Ascomycota	Pezizomycetes	CCCCGTGTTGAGTCAAATTAAGCCGCAGGCTCCACTCCTGGTGGTGCCCTTCCGTCAATTCCTTTAAGTTTCAGCCTTGCGACTATACTCCCCCCAGAACCCAAAAACTTTGAATTCTCGGAAGGTGCTAAGCGAGTCAAAATAGAACATCACCTAATCCCTAGTCGGCATAATTTATAGTTAAGACTACGACGGTATCTGATCGTCTTCGATCCCCTAACTTTCGTTCCCTGATTAATGAAAACATCCTTGGCAAATGCTTTCGCAGTAGTTAGTCTTCAATCGATCCAAGAATTTCACCTCTGACGATTGAATACTGATGCCCCTGACTATCCCTATTAATCATTACGGTGGTCCTAAAAACCAACAAAATAGAACCGCACG	U62013	358	4.79871e-150	0.96	1	384	0	0	0	0	0	7	0	0	0	0	0	0	0	0	0	0	0	0	0	0	0	0	0	0	0	0	0	0
S1196_0499	Basidiomycota	Fungi_other	CCCGTCAATTTGAGGGTCTTGCCCATGCGAACATGGACTAGCAATTATATTTAATAGGACAGACCACCTCACCCTTTCAGGCTGCTTTTTGGTGCAGAGCTACTGCGGCTGAGCTAGTAACAGTTTACACCTGGTGGTGCCCTTCCGTCAATTCCTTTAAGTTTCAGCCTTGCGACCATACTCCCCCCAGAACCCAAAGACTTTGATTTCTCGTAAGGTGCCGAATGACACATAATAATTGAGGTCATCCGATCCCTAGTCGGCATAGTTTACTGTTAAGACTACAACGGTATCTAATCGTTTTCGATCCCCTAACCTTCGTTCTTGATTAATGAAAACATCCTTGGCAAATGCTTTCGCAATAGTTGGTCTTGAGTCAATCCAAGAATTTCACCTCTA…	KJ137268	413	2.65397e-174	0.94	1	478	0	0	0	0	0	0	0	0	0	0	0	0	0	0	0	0	0	0	0	0	0	0	0	0	0	0	0	0
S1196_0500	Glomeromycota	Glomeromycetes	CCCCGTGTTGAGTCAAATTAAGCCGCAGGCTCCACCCCTGGTGGTGCCCTTCCGTCAATTCCTTTAAGTTTCAGCCTTGCGACCATACTCCCCCCGGAACCCAAACACTTTGGTTTCCCATAAGGTGCCGAGCGAGTCATTCAAATAACATCGCCCGATCCCTAGTCGGCATAGTTTATGGTTAAGACTACGACGGTATCTGATCGTCTTCGATCCCCTAACTTTCGTTCTTGATTAATGAAAACATCCTTGGCAAATGCTTTCGCAGTAGTTAGTCTTCAATAAATCCAAGAATTTCACCTCTGACAATTGAATACTAATGCCCCCAACTATCCCTATTAATCATTACGATTTTCCTAGAAACCAACAAAATAGATAAATCG	EF136887	351	6.035e-147	0.96	1	376	8	11	14	0	10	2	0	0	0	0	27	8	1	2	0	1	23	0	0	0	0	8	0	8	1	0	5	0
S1196_0502	Ascomycota	Dothideomycetes	CCCCGTGTTGAGTCAAATTAAGCCGCAGGCTCCACGCCTGGTGGTGCCCTTCCGTCAATTTCTTTAAGTTTCAGCCTTGCGACCATACTCCCCCCAGAACCCAAAAACTTATGATTTCTCGTAAGGTGCCGAGCGAGTCAATAGAAAAACATCGCCCGATCCCTAGTCGGCATAGTTTACGGTTAAGACTACGACGGTATCTGATCGTCTTCGATCCCCTAACTTTCGTTCACTGATTAATGAAAACATCCTTGGCGAATGCTTTCGCAGTAGTTAGTCTTCAATAGATCCAAGAATTTCACCTCTGACAATTGAATACTGACGCCCCCGACTATCCCTATTAATCATTACGGCGGTTCTAGAAACCAACAAAATAGGACCGCACG	AY538333	382	1.12773e-160	0.99	1	386	26	29	14	152	322	234	302	58	0	11	31	206	362	18	58	10	163	1	0	22	19	74	27	57	19	7	8	31
S1196_0508	Ascomycota	Sordariomycetes	CCCCGTGTTGAGTCAAATTAAGCCGCAGGCTCCACTCCTGGTGGTGCCCTTCCGTCAATTTCTTTAAGTTTCGGCCTTGCGGCAATACTCCCCCAGGAGCCCAAGCACTTTGATTTCTCGTAAGGTGCCGGACGAGTCAAAATATAACATCGTCCGATCCCTAGTCGGCATAGTTTATGGTTAAGACTACGACGGTATCTGATCGTCTTCGATCCCCTAACTTTCGTTCCTGATTAATGAAAACATCCTTGACAAATGCTTTCGCAGTAGTTAGTCTTCCATAGATCCAAGAATTTCACCTCTGACTATGGAATACTGATGCCCCCGACTGTCCCTATTAATCATTATGGCGGTCCTAGAAACCAACAAAATAGAACCGCACG	DQ643653	365	3.79273e-153	0.97	1	383	0	0	0	0	7	0	0	0	0	0	0	0	9	0	1	0	8	0	0	0	0	0	0	1	0	0	0	0
S1196_0510	Cryptomycota	Fungi_other	TCCCGTGTTGAGTCAAATTAAGCCGCAGGCTCCACTCCTGGTGGTGCCCTTCCGTCAATTCCTTTAAGTTTCGGCCTTGCGACTATACTCCCCCCAGAACCCAAAAACTTTGATTTCTCTCAAGGTGCCAATAAAGTCGAAAATGACTTTTACTGATCCCTAGTCGGCATAGTTTATGGTTAAGACTACGACGGTATCTGAACGTCTTCGATCCCCTAACTTTCGTTCTTGATTAATGAAAACATCCTTGGCAAATGCTTTCGCATTAGTTAGTCTTCAGAAAATCCGAGAATTTCACCTCTGACTTCTGAATACTAATGCCCCCAACTGTCCCTATTCATCATGACATTGGTCCTGAAAACCAACAAAATAGAACCAAAA	AF372713	323	1.51878e-134	0.92	1	380	0	0	0	0	0	0	0	0	0	0	0	0	0	0	0	0	0	0	0	0	5	0	0	0	0	0	0	0
S1196_0516	Neocallimastigomycota	Neocallimastigomycetes	CCCCGTGTTGAGTCAAATTAAGCCGCAGGCTCCACTCCTGGTGGTGCCCTTCCGTCAATTCCTTTAAGTTTCAGCCTTGCGACCATACTCCCCCCGGAACCCAAAAACTTGCGATTTCTCTGGAGGTGCTGATGGAGTCAGAAATTTAACATCCACCAATCCCTAGTCGGCATCGTTTATGGTTAAGACTACGACGGTATCTGATCGTCTTCGATCCCCTAACTTTCGTTCTTGATTAATGAAAACATCCTTGGCAAATGCTTTCGCAGAAGTTCGTCTTTCACAAATCTAAGAATTTCACCTCTGACTGTAAAATACGAATGCCCCCAACTGTCCCTATTAATCATTACTTCGGTCCTATAAACCAACAAAATAGAACCAAAGTCCTATTCCATTATT…	FJ848516	353	8.3925e-148	0.93	1	405	0	0	0	0	0	0	0	0	0	0	0	0	0	0	0	0	0	7	9	0	0	0	0	2	0	0	0	0
S1196_0517	Basidiomycota	Fungi_other	CCCCGTGTTGAGTCAAATTTGATAATCTTTACTCCTGGTGGTGCCCTTCCATCAATTCCTTTAAGTTTCAGCCTTGCGACCATACTCCCCCCAGAACCCAAAGACTTTGATTTCTCGTTTCTTGTAAGGTGCTGAACGACGCATAATATTGAGGTCGTCCGATCCCTAGTCGGCATAGTTTACTGTTAAGACTACAACGGTATCTGATCGTTTTTGATCCCCTAACCTTCGTTCTTGATTAATGAAAACACCCTTGGCAAATGCTTTTGCAATAGTTTGTCTTGCGTAAATCCAAGAATTTCACCTCTAGCAATGCAATACAAATGCCCCCAACTATCCCTATTAATCATTATGGCGACTCTAGAAACCAACAAAATAGAACTGCACGTCCTATTCTAT…	DQ457626	347	3.87137e-145	0.93	1	411	0	0	0	0	0	0	0	0	0	0	0	0	0	0	0	0	0	0	0	0	0	0	0	0	0	38	0	0
S1196_0519	Ascomycota	Eurotiomycetes	CCCCGTGTTGAGTCAAATTAAGCCGCAGGCTCCACGCCTTGTGGTGCCCTTCCGTCAATTTCTTTAAGTTTCAGCCTTGCGACCATACTCCCCCCAGAGCCCAAAAACTTTGATTTCTCGTAAGGTGCCGAACGGGTCATAGAAAAGAAACACCGTCCGATCCCTAGTCGGCATGGTTTATGGTTAAGACTACGACGGTATCTGATCGTCTTCGATCCCCTAACTTTCGTTCGACTGATTAATGAAAACATCCTTGGCGAATGCTTTCGCAATAGTTAGTCTTCAATAAATCCAAGAATTTCACCTCTGACAATTGAATACTGACGCCCCCGACTATCCCTATTAATCATTACAGCGGTCCTAGAAACCAACAAAATAGAACCGCACGTCCTATTTCAT…	KP115825	387	7.3901e-163	0.97	1	411	62	13	84	40	171	48	100	23	1	14	19	16	8	0	23	0	3	0	0	0	5	13	5	11	32	34	4	8
S1196_0522	Basidiomycota	Agaricomycetes	TCCCGTGTTGAGTCAAATTAAGCCGCAGGCTCCACTCCTGGTGGTGCCCTTCCGTCAATTCCTTTAAGTTTCAGCCTTGCGACCATACTCCCCCCAGAACCCAAAGACTTTGATTTCTCGTAAGGTACCGAACGACACATCAAATTGAGGTCATCCGAGCCCTAGTCGGCATAGTTTACTGTTAAGACTACAACGGTATCTAATCGTTTTCGATCCCCTAACCTTCGTTCTTGATTAATGAAAACATCCTTGGCAAATGCTTTCGCAGTAGTTAGTCTTCCGTAAATCCAAGAATTTCACCTCTAGCAACGGAATACTAATGCCCCCAACTATCCCTATTAATCATTACGGCGATCCTAAAAACCAACAAAATAGAACCGCACGTCCTATTTTATTATT…	U59074	383	4.31003e-161	0.97	2	406	10	1	2	4	4	10	0	0	0	3	0	8	3	0	7	18	0	0	2	0	0	3	48	1	0	0	0	0
S1196_0523	Ascomycota	Sordariomycetes	CCCCGTGTTGAGTCAAATTAAGCCGCAGGCTCCACCCCTGGTGGTGCCCTTCCGTCAATTTCTTTAAGTTTCAGCCTTGCGACCATACTCCCCCCAGAACCCAGAAACTTGTACTTTCGTGTAAGGTGCCGAGCGGGTCAAAAGATAACACCGCCCGATCCCTAGTCGGCATAGTTTATGGTTAAGACTACGACGGTATCTGATCGTCTTCGATCCCCTAACTTTCGTTCCTGATTAATGAAAGCATCCTTGGCAAATGCTTTCGCAGTAGTTAGTCTTCAATAAATCCAAGAATTTCACCTCTGACAATTGAATACTGATGCCCCCGACTGTCCCTATTAATCATTACGGCGGTCCTAGAAACCAACAAAATAGAACCACGCG	EU128054	372	3.01578e-156	0.98	1	384	18	18	6	26	151	33	67	12	0	16	13	66	42	6	24	8	2	2	0	3	1	9	3	6	8	0	4	1
S1196_0527	Glomeromycota	Glomeromycetes	CCTCGTGTTGAGTCAAATTAAGCCGCAGGCACCACCCCTGGTGGTGCCCTTCCGTTAATTCCTTTAAGTTTCAGCCTTGCGACTATACTCCCCCCCAGAACCCAAACACTTTGGTTTTCCATAAGGCGCCGAACGAGTCATTAAAAAATTAACATCGTCCGATCCCTAGTCGGCATAGTTTATGGTCAAGACTACGATGGTATCTAATCGTCTTCGATCCCCTAACTTTCGTTTAATGAAAACATCCTTGGCAAGTGCTTTCGCAGAAGTTAGTCTTCAATAAATCCAAGAATTTCACATCTGACAATTGAATACCAATGCCCTCAACTATCCCTATTAATCATTACAAAATAGAACCATGCCG	EF136887	302	2.89096e-125	0.94	1	347	0	10	0	0	0	0	0	0	0	0	0	0	0	0	0	0	0	0	0	0	0	0	0	0	0	0	0	0
S1196_0528	Ascomycota	Lecanoromycetes	CCCCGTGTTGAGTCAAATTAAGCCGCAGGCTCCACGCCTGGTGGTGCCCTTCCGTCAATATCTTTAAGTTTCAGCCTTGCGACCATACTCCCCCCAGAACCCAAAGACTTTGATTTCTCGTAGGGTGCCGAACGGGTCAAAATAATAACACCGTCCGATCCCCAGTCGGCATAGTTTATGGTTAAGACTACGACGGTATCTGATCGTCTTCGATCCCCTAACTTTCGTTCACTGATTAATGAAAACATCCTTGGCAAATGCTTTCGCAGTAGTTAGTCTTCAATAAATCCAAGAATTTCACCTCTGGCAATTGAATACTGATGCCCCCGACTATCCCTATTAATCATTACGGCGGTCCTAGAAACCAACAAAATAGAACCACACG	AF241544	383	4.05435e-161	0.99	1	385	21	15	7	18	150	35	47	0	0	0	50	60	58	55	86	10	196	139	35	56	19	95	6	57	10	25	1	2
S1196_0529		Fungi_other	TCCCGTGTTGAGTCAAATTAAGCCGCAGGCTCCACTCCTGGTGGTGCCCTTCCGTCAATTCCTTTAAGTTTCAGCCTTGCGACCATACTCCCCCCAGAACCCAAAAACTTTGATTTCTCTTAAGGTCCCGGCGGAGTCACCACGACGTCCGCCGATCCCCAGTCGGCATCGTTTACGGTTAAGACTACGACGGTATCTAATCGTCTTCGATCCCCTAACTTTCGTCCTTGATTAACGGGAACATCCTTGGCAAATGCTTTCGCACTAGTCAGTCTTTGGAAAATCCAAGAATTTCACCTCTGACTTCCAAATACTAATGCCCCCAACTGCCCCTATTGATCATTACCCTGGTCCTCACCGTACCAACAAAATAGAACCACGGTCCTATTCCATTATTCC…	FJ687268	317	7.41236e-132	0.89	1	404	0	0	0	0	0	0	0	0	0	0	0	0	0	0	0	1	0	8	0	2	0	0	0	0	0	0	0	0
S1196_0531	Ascomycota	Laboulbeniomycetes	CCCCGTGTTGAGTCAAATTAAGCCGCAGGCTCCACGCCTGGTGGTGCCCTTCCGTCAATTTCTTTAAGTTTCAGCCTTGCGACCATACTCCCCCCAGAACCCAAAAACTTTGATTTCTCGTAAGGTGCCGAGTGAGTCGTTATAAGAACACCACCCGATCCCTAGTCGGCATAGTTTACGGCTAAGACTACGACGGTATCTGATCGTCTTCGATCCCCTAGCTTTCGTTCTTGATTAATGAAAACATCTTTGGCAAATGCTTTCGCAGTAGTTAGTCTTCAATAAATCCAAGAATTTCACCTCTGACAATTGAATACTAATGCCCCCAACTGTCCCTATTAATCATTACAGCGGTCCTAGAAACCAACAAAATAGAACCACATG	FJ176839	362	8.1134e-152	0.97	1	382	0	1	0	0	0	0	13	0	0	0	0	0	0	0	0	0	0	0	0	0	0	5	0	0	0	0	0	0
S1196_0532	Entomophthoromycota	Entomophthoromycetes	TCCCGTGTTGAGTCAAATTAAGCCGCAGGCTCCACTCCTGGTGGTGCCCTTCCGTCAATTCCTTTAAGTTTCAGCCTTGCGACCATACTCCCCCCGGAACCTAAAAACTTTGATTTCTCATAAGGTGCCAATGAAGATATAAATAAACTCCACTGATCCCTAGTCGGCATAGTTTATGGTTAAGACTACGACGGTATCTAATCGTCTTCGATCCCCTAACTTTCGTTCTTGATTAATGAAAACATCCTTGGCAAATGCCTTCGCAGTTGTTAGCCTTGAGCAAATCCAAGAATTTCACCTCTGACTGCTCAATACTAATGCCCCCAACTATCCCTATTAATCATTACCTTGGTCCTAGAAACCAACAAAATAGTACCAAAG	AF368504	327	2.56787e-136	0.93	2	381	0	0	0	0	70	0	0	0	0	0	0	0	8	0	0	0	0	0	0	0	0	0	0	0	0	0	0	0
S1196_0534	Ascomycota	Sordariomycetes	CCCCGTGTTGAGTCAAATTAAGCCGCAGGCTCCACTCCTGGTGGTGCCCTTCCGTCAATTTCTTTAAGTTTCAGCCTTGCGACCATACTCCCCCTGGAGCCCAAGCACTTTGATTTCTCGTAAGGTGCCAAACGTGTCACCATAATAACAACGTCTGATCCCTAGTCGGCATAGTTTATGGTTAAGACTACGACGGTATCTGATCGTCTTCGATCCCCTAACTTTCGTTCCTGATTAATGAAAACATCCTTGGCAAATGCTTTCGCAGTGGGTAGTCTTCAATAAATCCAAGAATTTCACCTCTGACTATTGAATACTGATGCCCCCGACTGTCCCTATTAATCATTACGGCGGTTCTCTAAACCAACAAAATAGAACCACACGTCCTATTTTATTATT…	DQ979499	374	4.1576e-157	0.96	1	404	0	2	0	9	0	6	0	0	0	0	0	0	0	1	0	0	4	0	0	0	0	0	0	0	0	0	0	3
S1196_0536	Cryptomycota	Fungi_other	TCCCGTGTTGAGTCAAATTAAGCCGCAGGCTCCACTCCTGGTGGTGCCCTTCCGTCAATTCCTTTAAGTTTCAGCCTTGCGACCATACTCCCCCCAGAACCCAAACACTTTGATTTCTCTCACGGTCCTGATGACGTCCAAACCGACATTCACCAATCCCGAGTCGGCAACGTTTACGGTTGTGACTACGACGGTATCTAATCGTCTTCGATCCCACAACTTTCGTTCTTGATCAATGAAAACATCCTTGGCAAATGCTTTCGCACTAGTTAGTCTTCAATAAATCCAAGAATTTCACCTCTGACTACCGAATACTAATGCCCCCAACTGTCCCTCTTAATCATTATAATGATCCTCAAACCAACAAAATAAGACCATCA	AF372713	312	1.12969e-129	0.91	1	377	0	0	0	0	0	0	0	0	0	0	0	0	0	0	0	0	0	0	0	0	158	0	0	0	0	0	0	0
S1196_0537	Ascomycota	Fungi_other	CCCCGTATTAAGTTAAATTAAGCCGTAGGCTCCATACCTGGTGGTACCCTTCCGTTAATTTCTTTAAGTTTTAGCCTTACGACTATACTCCCCCTAGAGCCCAAGCACTTTAATTTCTCGTAAGGTACCGAGCGGGTTAAATAGTAATACTGCCCGATCCCTAGTCGGTATAGTTTATAGTTAAGACTATGACGGTATCTGATCGTCTTCGATCCCCTAACTTTCGTTCCTGATTAATAAAAATATCCTTGGCAAATGCTTTTATAGTAGTTAGTCTTCGGTAAATCTAAGAATTTCACCTCTAATAACCGAATACTAATGCCCCCGACTGTCCCTATTAATCATTACGGCGGTCCTAGAAACCAACAAAATAGAACCACGCG	DQ470999	313	4.11085e-130	0.9	1	383	0	0	0	0	0	0	0	0	0	0	0	2	0	0	0	0	0	0	0	0	0	0	0	0	0	0	0	0
S1196_0541	Ascomycota	Dothideomycetes	CCCCGTGTTGAGTCAAATTAAGCCGCAGGCTCCACTCCTGTAAAAAGTTAGTTTCGAATCTCGAATATTTTTTGAATGAACATACCTGGTGGTGCCCTTCCGTCAATTTCTTTAAGTTTCAGCCTTGCGACCATACTCCCCCCAGAACCCAAAAACTTTGATTTCTCGTAAGGTGCCGATGGAGTCAAAATAATAACATCCACCGATCCCTAGTCGGCATAGTTTATGGTTAAGACTACGACGGTATCTGATCGTCTTCGATCCCCTAACTTTCGTTCACTGATTAATGAAAACATCCTTGGCAAATGCTTTCGCAGTAGTTAGTCTTCAATAAATCCAAGAATTTCACCTCTGACAATTGAATACTGATGCCCCCGACTATCCCTATTAATCATTACG…	EU343049	340	5.16912e-142	0.98	81	430	0	0	0	0	0	0	0	0	0	0	3	0	0	0	0	0	0	0	0	0	0	0	0	0	0	0	0	0
S1196_0542	Chytridiomycota	Chytridiomycetes	CCCCGTGTTGAGTCAAATTAAGCCGCAGGCTCCACTCCTGGTGGTGCCCTTCCGTCAATTCCTTTAAGTTTCAGCCTTGCGACCATACTCCCCCCGGAACCCAAAAACTTTGATTTCTCATAAGGTGCCGATCGAGTCATTGAAAATAATCTCGACCGATCCCTAGTCGGCATAGTTTATGGTTAAGACTACGACGGTATCTAATCGTCTTTGATCCCCTAACTTTCGTTCTTGATCAATGAAAACATCCTTGGCAAATGCTTTCGCAGAAGTTAGTCTTTCATAAATCCAAGAATTTCACCTCTGACAATTAAATACTAATGCCCCCAACTATCCCTATTAATCATTACTTCGGTCCTAGAAACCAACAAAATAGAACCAAAG	JN020240	364	1.05498e-152	0.97	1	384	0	2	0	0	0	0	0	2	0	6	5	0	0	1	0	0	1	0	8	0	0	0	0	0	0	2	0	0
S1196_0543	Basidiomycota	Agaricomycetes	CCCTGTGTTGAGTCAAATTAAGCCACAGGCTCCACTCCTGGTGGTGCCCTTCTGTCAATTCCTTTAAGTTTCAGCCTTGCGACCATACTCCCCCCAGAACCCAAAGACTTTGATTTCTCGTAAGGTGCTGAACAACGCATAATATTGAGGTTGTCCAATCCCTAGTCAGCATAGTTTACTGTTAAGACTACAACAGTATCTGATTGTTTTTGATCCCCTAACCTTCGTTCTTGATTAATGAAAACATCCTTGGCAAATGCTTTTGCAGTAGTTTGTCTTGTGTAAATCCAAGAATTTCACCTCTAGCAACGCAATACAAATGCCCCCAACTATCCCTATTAATCATTACAGCGACTCTAGAAACCAACAAAATAGAACCGCACG	AF082845	352	2.18276e-147	0.95	1	384	0	0	0	0	0	0	0	0	0	0	0	0	0	0	0	0	0	0	0	0	0	12	0	0	0	0	0	0
S1196_0544	Basidiomycota	Agaricomycetes	CCCCGGGCTAATACCACCTCACCCTTTCGGGCTGCTTTTCGGTGCAGAGCTACTGCGGCTAGCTGTGAGCATGTTTACACCTGGTGGTGCCCTTCCGTCAATTCCTTTAAGTTTCAGCCTTGCGACCATACTCCCCCCAGAACCCAAAGACTTTGATTTCTCGTAAGGTGCCGAGCGACACATAATAATTGAGGTCGCCCGATCCCTAGTCGGCATAGTTTACTGTTAAGACTACAACGGTATCTGATCGTTTTCGATCCCCTAACCTTCGTTCTTGATTAATGAAAACATCCTTGGCAAATGCTTTCGCAATAGTTGGTCTTGAGTCAATCCAAGAATTTCACCTCTAGCGACTCAATACCAATGCCCCCAACTATCCCTATTAATCATTACGGCGAC…	KJ137258	422	2.42343e-178	0.99	1	428	0	0	0	0	0	0	0	0	0	0	0	0	0	0	2	0	0	0	0	0	0	1	0	0	0	0	0	0
S1196_0545	Basidiomycota	Tritirachiomycetes	CCCCGTGTTGAGTCAAATTAAGCCGCAGGCTCCACACCTGGTGGTGCCCTTCCGTCAATTCCTTTAAGTTTCAGCCTTGCGACCATACTCCCCCCCGAACCTAGACTTAAAGATTTCTCTTCGGGTGCCGGGCGAGTCATTCAAAATCTGCGCCCGATCCCCAGTCGGCATCGTTTACTGATGGGACTACAACGGTATCTGATCGTTTTGGATCCCCCATCCTTCGTGCTTGATCAATGCGCGCATCTTTGGCAAATGCTTTCGCAGTAGTTCGTCCTCGGCAAATCCAAGAATTTCACCTCTAGCAGCCGAATACGAATGCCCCCAACTACCGCTATTCATCATTACGGCGCTCCTAGAAACCAACGAATTAGGAACGCGCG	KF258733	351	6.035e-147	0.95	1	383	0	2	0	0	0	0	0	0	0	0	0	0	0	0	0	0	0	0	0	0	0	0	0	0	0	0	0	0
S1196_0547	Chytridiomycota	Chytridiomycetes	TCCCGTGTTGAGTCAAATTAAGCCGCAGGCTCCACTCCTGGTGGTGCCCTTCCGTCAATTCCTTTAAGTTTCAGCCTTGCGACCATACTCCCCCCGGAACCCAAAAACTTTGATTTCTCATAAGGTGCCGATGGAGTCATCAAAAATAAAACTTCCACCGATCCCTAGTCGGCATAGTTTATGGTTAAGACTACGACGGTATCTAATCGTCTTCGATCCCCTAACTTTCGTTCTTGATTAATGAAAACATCCTTGGCAGATGCTTTCGCAGAAGTTAGTCTTTCATAAATCCAAGAATTTCACCTCTGACAATTAAATACTAATGCCCCCAACTATCCCTATTAATCATTACTTCGGTCAAATAAAACCAACAAACATAGAACCAAAGTCCTATTTTAT…	DQ643792	365	4.11356e-153	0.95	2	411	0	0	0	0	0	0	0	0	0	0	1	0	1	5	0	0	1	0	10	0	1	0	0	1	0	0	0	0
S1196_0548	Glomeromycota	Glomeromycetes	TCCTATGTTGAGTCAAATTAAGCCACAAGCTCCACCCCTGGTGGTGCCCTTCTGTCAATTCCTTTAAGTTTCAGCCTTGCAACCATACTCCCCCGGAACCCAAACACTTTGGTTTTCCGTAAGGTGCCAAATGAGTCATTAAAAAAATTAACATCATCTGATCCCTAATTGGCATAGTTTATGATTAAGATTACAACGATATCTGATCGTCTTCGATCCCCTAACTTTCATTCTTGATTAATGAAAACATCTTTGGCAAATGCTTTCGCAGTAGTTAATCTTCAATAAATCCAAGAATTTCACTTCTGACAATTGAATACTAATGCCACCAACTATCCCTATTAATCATTACATCGATCCTAGAAACCAACAAAATAAAATTAACGTCCTATTCCATTA…	EU169420	350	1.80508e-146	0.93	6	409	0	0	0	0	0	0	0	0	0	0	0	0	0	2	0	0	2	0	0	0	0	0	0	0	0	0	0	0
S1196_0553	Basidiomycota	Fungi_other	CCCCGTGTTGAGTCAAATTAAGCCACAGGCTCCACTCCTGGTGGTGCCCTTCCGTCAATTCCTTTAAGTTTCAGCCTTGCGACCATACTCCCCCCGGAACCTAAAAACTTTGATTTCTCTCAAGGTGCCGAACAGGTCATAAAATATCCTGTCCGATCCCTAGTCGGCATAGTTTATTGTTAAGACTACGACGGTATCTGATCGTCTTCGATCCCCTAACTTTCGTTCTTGATTAATGAAAACATCCTTGGCAAATGCTTTCGCAATAGTTGGTCTTGAGTCAATCCAAGAATTTCACCTCTAGCGACTCAATACCAATGCCCCCAACTATCCCTATTAATCATTACGGCGACTCTAGAAACCAACAAAATAGAACCGCACG	M55638	340	4.48897e-142	0.94	1	382	0	0	0	0	0	0	0	0	0	0	0	0	6	0	0	0	0	0	0	0	0	0	0	0	0	0	0	0
S1196_0554	Ascomycota	Fungi_other	CCCCGTGTTGAGTCAAATTAAGCCGCAGGCTCCACCCCTGGTGGTGCCCTTCCGTCAATTTCTTTAAGTTTCAGCCTTGCGACCATACTCCCCCTGGAACCCAAAAACTTTTGATTTCTCGCAATTCGCTGAGCAGGTCAATAAATAACACTGCCCAAAAAATGGTCGGCATAGTTTATGGTTAAGACTACGACGGTATCTGATCGTCTTCGATCCCCTAACTTTCGTTCCTGATTAATGAAAACATCCTTGGCAAATGCTTTCGCAGTAGTTAGTCTTCAATAAATCCAAGAATTTCACCTCTGACAATTGAATACTGATGCCCCCGACTGTCCCTATTAATCATTACGGCGGTCCTAGAAACCAACAAAATAGAACCACACG	AF279399	342	5.87233e-143	0.94	1	384	0	1	0	0	0	0	0	0	0	0	0	0	0	42	8	25	0	0	0	0	0	21	0	8	2	3	0	0
S1196_0556	Ascomycota	Fungi_other	CCCCGTGTTGAGTCAAATTAAGCCGCAGGCTCCACTCCTGGTGGTGCCCTTCCGTCAATTTCTTTAAGTTTCAGCCTTGCGACCATACTCCCCCCAGAACCCTAACTTTGATTTCTCGTAGGGTGCCGAGCGAGTCAAAGAGAAAACATCGCCCGATCCCCAGTCGGCATAGTTTATGGTTAAGACTACAACGGTATCTGATCGTTTTCGATCCCCTAACTTTCGTTCCTGATTAATGAAAACATCCTTGGCAAATGCTTTCGCAGTAGTTAGTCTTCAATAAATCCAAGAATTTCACCTCTGACAATTGAATACTGATGCCCCCGACTGTCCCTATTAATCATTACGGCGGTCCTAGAAACCAACAAAATAAGACTGCGCG	U53369	356	3.66827e-149	0.96	1	382	13	0	0	0	0	0	0	0	0	0	0	0	0	0	0	0	0	2	3	0	0	0	0	0	0	0	0	0
S1196_0558	Chytridiomycota	Chytridiomycetes	CCCCGTGTTGAGTCAAATTAAGCCGCAGGCTCCACTCCTGGTGGTGCCCTTCCGTCAATTCCTTTAAGTTTCAGCCTTGCGACCATACTCCCCCCGGTACCCAAAGACTTTGATTTCTCATAGGATGCCGAACGGGTCATGATAAACACCGTCCGATCTCCAGTCGGCATAGTTTATGGTCGGGACTACAACGGTATCTGATCGTTTTCGATCCCCCGACTTTCGTTCTTGATTAATGAAAACATCCTTGGCAAATGCTTTCGCAGAAGTTAGTCTTTCATAAATCCAAGAATTTCACCTCTGACAATTAAATACTAGTGCCCCCAACTATCCCTATTAATCATTACTTCGGTCCTAGAAACCAACAAAATAGAACCAAAG	DQ536486	348	1.27934e-145	0.95	1	381	0	0	0	0	0	0	0	0	0	0	6	0	0	0	0	0	0	0	3	0	0	0	0	9	0	0	0	0
S1196_0559	Basidiomycota	Agaricomycetes	CCCCGTGTTGAGTCAAATTAAGCCACAGGCTCCACACCTGGTGGTGCCCTTCCGTCAATTCCTTTAAGTTTCAGCCTTGCGACCATACTCCCCCCAGAACCCAAAGACTTTGATTTCTCGTAAGGTGCTGAGCGATACATAATATTTGAATTCGCCCAATCCCTAGTCGGCATAGTTTACTGTTAAGACTACAACGGTATCTGATCGTTTTCGATCCCCTAACCTTCGTTCTTGATTAATGAAAACATCCTTGGCAAATGCTTTCGCAGTAGTTGGTCTTGAGTCAATCCAAGAATTTCACCTCTAGCGACTCAATACCAATGCCCCCAACTATCCCTATTAATCATTACGGCGACTCTAGAAACCAACAAAATAGAACCGCCAG	JF706314	370	2.3263e-155	0.98	1	382	2	8	1	0	1	0	6	10	0	5	10	2	1	42	2	3	12	1	0	0	5	0	0	0	1	0	3	0
S1196_0562	Basidiomycota	Agaricomycetes	CCCCGTGTTGAGTCAAATTAAGCCGCAGGCTCCACTCCTGGTGGTGCCCTTCCGTCAATTCCTTTAAGTTTCAGCCTTGCGACCATACTCCCCCCAGAACCCAAAGACTTTGATTTCTCGCAAGGTGCCGAATGAGTCATTAAAAAAACTTCATCCGATCCCTAGTCGGCATCGTTTACTGTTAAGACTACAACGGTATCTGATCGTTTTCGATCCCCTAACCTTCGTTCTTGATCAATGAAAACATCCTTGGCAAATGCTTTCGCAGTAGTCAGTCTTCGATAAATCCAAGAATTTCACCTCTAGCAATCGAATACTAATGCCCCCAGCTGTCCCTATTAATCATTACGGCGATCCTAGAAACCAACAAAATAGAACCGCAACG	GU187655	348	1.29489e-145	0.95	1	382	60	10	0	4	12	23	4	0	0	0	11	7	163	456	0	1	0	0	0	0	4	17	0	0	1	2	1	0
S1196_0563	Blastocladiomycota	Blastocladiomycetes	TCCCGTGTTGAGTCAAATTAAGCCGCAGGCTCCACTCCTGGTGGTGCCCTTCCGTCAATTCCTTTAAGTTTCAGCCTTGCGACCATACTCCCCCCAGAACCCAAAAACTTTAATTTCTCAAAAGGTGCCAGATGTGTCTTACTTAAAAAGGTACTACAAATCATCTGATCCCTGGTCGGCATCGTTTATGGTTAAGACTACGATGGTATCTAATCATCTTCGATCCCTTAACTTTCGTTCTTGATTAATGAAAACATCCTTGGCAAATGCTTTCGCAGAAGTTAGTCTTTCCTAAATCCAAGAATTTCACCTCTGACAATTAAATACTAATGCCCCCAACTATCCCTATTAATCATTACTCTAGTCCTAGAAACCAACAAAATAGAACCAAAG	U23936	354	2.91516e-148	0.95	2	393	0	0	0	0	0	0	0	0	0	0	0	0	0	0	0	0	0	0	0	0	2	14	0	6	0	0	0	0
S1196_0564	Ascomycota	Orbiliomycetes	CCCGCAATTTGAGTGTGTCGCCTGCGGCCAGGTGCCGCAGACTAGCCATTTACAAAGGCACCACCTTTCCCTTTCGGGCGGCTCTTAGGAGCAGAGTCTTGCGGTTTACTCCTGGTGGTGCCCTTCCGTCAATTCCTTTAAGTTTCAGCCTTGCGACCATACTCCCCCCAGAACCCAAAGACTTTGATTTCTCGTAAGGTGCCGAGCGGGTCATGAATTTAACACCGCCCGATCCCTGGTCGGCATAGTTTATGGTTAAGACTACGACGGTATCTGATCGTCTTCGATCCCCTAACTTTCGTTCACTGATTAATGAAAACATCCTTGGCAAATGCTTTCGCAGTAGTTAGTCTTCAATAAATCCAAGAATTTCACCTCTGACAATTGAATACTGATGCC…	EF053581	370	2.82565e-155	0.95	40	458	0	0	0	0	0	0	0	0	0	0	0	0	0	2	0	0	0	0	0	0	0	0	0	0	0	0	0	0
S1196_0568	Ascomycota	Dothideomycetes	CCCCGTGTTGAGTCAAATTAAGCCGCAGGCTCCACGCCTGGTGGTGCCCTTCCGTCAATTTCTTTAAGTTTCGGCCTTGCGACTATACTCCCCCCAGAACCCAAACACTTTGATTTCTCGTAAGGTGCCGAGGTAACCAAAAATGAGTATACCCCGATCCCTAGTCGGCATAGTTTATGGTTAGGACTACGACGGTATCTGATCGTCTTCGATCCCCTAACTTTCGTTCACTGATTAATGAAAACATCCTTGGCAAATGCTTTCGCAGTAGTTAGTCTTCAATAAATCTAAGAATTTCACCTCTGACAATTGAATACTGATGCCCCCGACTGACCCTATTAATCATTACGGCGGTCCTAGAAACCAACAAAATAGGACCGCACG	AF438181	382	1.12097e-160	0.99	1	384	0	0	0	0	0	0	0	0	0	0	0	0	0	0	0	0	0	0	0	0	0	6	0	0	0	0	0	0
S1196_0572	Ascomycota	Eurotiomycetes	CCCCGTGTTGAGTCAAATTAAGCCGCAGGCTCCACGCCTGGTGGTGCCCTTCCGTCAATTTCTTTAAGTTTCAGCCTTGCGACCATACTCCCCCCCGAGCCCAAAAACTTTGATTTCTCGTAAGGTGCCGAACGGGGCATAAAAAAACCACCGTCCGATCCCTAGTCGGCATAGTTTATGGTTAAGACTACGACGGTATCTGATCGTCTTCGATCCCCTAACTTTCGTTCACTGATTAATGAAAACATCCTTGGCGAATGCTTTCGCAGTAGTTAGTCTTCAATAAATCCAAGAATTTCACCTCTGACAACTGAATACTAATGCCCCCAACTATCCCTATTAATCATTACGGCGACTCTAGAAACCAACAAAATAGAACCGCACG	U42473	367	4.96144e-154	0.97	1	385	777	341	282	1638	1070	429	642	211	0	822	1605	1481	925	1224	502	253	887	259	138	208	925	487	515	850	423	425	58	381
S1196_0576	Ascomycota	Sordariomycetes	CCCCGTGTTGAGTCAAATTAAGCCGCAGGCTCCACTCCTGGTGGTGCCCTTCCGTCAATTTCTTTAAGTTTCAGCCTTGCGACCATACTCCCCCTGGAACCCAAAGACTTTGCTTTCGCGTAAGGTGCTGAACGAGTCAAAAAATAACATCGTCCAATCCCTAGTCGGCATAGTTTATGGTTAAGACTACGACGGTATCTGATCGTCTTCGATCCCCTAACTTTCGTTCCTGATTAATGAAAACATCCTTGGCAAATGCTTTCGCAGTAGTTAGTCTTCAATAAATCCAAGAATTTCACCTCTGACAATTGAATACTGATGCCCCCGACTGTCCCTATTAATCATTACGGCGGTCCTAGAAACCAACAAATAGAACCACGCG	AF279409	363	2.90803e-152	0.97	1	382	0	0	0	0	16	1	0	0	0	0	0	0	0	0	0	0	0	0	0	1	0	0	0	0	0	0	0	0
S1196_0579	Ascomycota	Sordariomycetes	CCCCGTGTTGAGTCAAATTAAGCCGCAGGCTCCACTCCTGGTGGTGCCCTTCCGTCAATTCCTTTAAGTTTCAGCCTTGCGACCATACTCCCCCCAGAACCCAAAGACTTTGATTTCTCGTAAGGTGCCGAGCGACACATAAAAATAACATCGTCCGATCCCTAGTCGGCATAGTTTATAGTTAAGACTACGACGGTATCTGATCGTCTTCGATCCCCTAACTTTCGTTCCTTATCAATGAAAACATCCTTGGCAAATGCTTTCGCAGTAGTTAGTCTTCAATAGATCCAAGAATTTCACCTCTGACAATTGAATACTGATGCCCCCGACTGTCCCTATTAATCATTACGGCGGTCCTAGAAACCAACAAAATAGAACCACGCG	AF279409	360	6.2397e-151	0.97	1	384	29	48	30	87	29	157	37	24	0	13	45	30	246	129	50	29	90	46	6	33	217	59	21	22	159	40	3	16
S1196_0580	Cryptomycota	Fungi_other	TCCCGTGTTGAGTCAAATTAAGCCGCAGGCTCCACTCCTGGTGGTGCCCTTCCGTCAATTCCTTTAAGTTTCAGTCTTGCGACCATACTCCCCCCAGAACCCAAACACTTTGATTTCTCTCAAGGTGCCGATAAAGTCAATATGACGTTTACCGATCCCTAGTCGGCATCGTTTATGGTTAAGACTACGACGGTATCTAATCGTCTTCGATCCCCTAACTTTCGTTCTTGATTAATGAAAACATCCTTGGCAAATGCTTTCGCATTAGTTAGTCTTCCGGTAATCCAAGAATTTCACCTCTGACACCGGAATACTAATGCCCCCAACTGTCCCTATTCATCATGACAGTGGTCCTCAAACCAACAAAATAGAACCATCGTCCTATTCCATTATTCCATG…	AF372717	335	7.80914e-140	0.92	1	402	3	0	0	0	0	0	0	0	0	0	8	0	0	0	0	4	0	0	0	0	0	0	0	0	0	1	0	0
S1196_0581	Basidiomycota	Atractiellomycetes	CCCCGTGTTGAGTCAAATTAAGCCGCAGGCTCCACACCTGGTGGTGCCCTTCCGTCAATTCCTTTAAGTTTCAGCCTTGCGACCATACTCCCCCCCGAACCTAGACTTAAAGATTTCTCTTCAGGTGCCGAACAAGTCATAGATTGTGCTTGTCCGATCCCTAGTCGGCATAGTTTACTGTTAAGACTACAACGGTATCTGATCGTTTTCGATCCCCTAACCTTCGTTCTTGATCAATGAAAACATCCTTGGCAAATGCTTTCGCAGTAGTTCGTCTTGCTAGAATCCAAGAATTTCACCTCTGACCAAGCAATACGAATGCCCCCGACTATCCCTATTAATCATTACGGCGAATTTAGAAACCAACAAAATAAAGACGCGCG	DQ198796	367	4.93164e-154	0.97	1	383	3	4	0	50	156	14	157	0	0	0	0	100	1	4	0	0	5	0	0	1	0	21	0	0	0	4	0	10
S1196_0582	Entomophthoromycota	Fungi_other	CCCCGTGTTGAGTCAAATTAAGCCGCAGGCTCCACTCCTGGTGGTGCCCTTCCGTCAATTCCTTTAAGTTTCAGCCTTGCGACCATACTCCCCCCGGAACCCAAACACTTTGATTTCTCTTAAGGTGCTGAGATGCTTAACAAAATAATGCTTCCCAATCCCTAGTTGGCATAGTTTATGGTTGAGACTACGACGGTATCTAATCATCTTCGATCCCCCAACTTTCGTCCTTGATCAATGGAAATGCCCTTGGCAAATGCTTTCGCAAAAGTTAGTCTTTCATAAATCCAAGAATTTCACCTCTGACAATTAAATACTAATGCCCCCAATCATTCCTAAAAATCATTACTTTGGCTTTGAAAACCAACGAAATAAAACCAAAATCCTATTCCATTATTC…	AF296754	330	1.29551e-137	0.91	1	406	0	0	0	0	0	0	0	0	0	0	0	0	0	0	0	0	0	0	15	0	2	0	0	0	0	0	0	0
S1196_0583	Glomeromycota	Glomeromycetes	CCCCGTGTTAAGTCAAATTAAGCCGCAGGCTCCACCTCTGGTGGTGCCCTTCCGTCAATTCCTTTAAGTTTCAGCCTTACGACCATACTCCCCCCAGAACCCAAACACTTTGGTTTCCCGTAAAGCGCCGAATGAGTCATTAAAAAATTAACATCATCCGATCCCTAGTCGGCATAGTTTATGGTTAAGATTACAACGGTATCTGATCGTCTTCGATCCCCTAACTTTCGTTCTTGATTAATGAAAACATCCTTGGCAAATGCTTTCGCAGTAGTTAGTCTTCAATAAATCCAAGAATTTCACCTCTGACAATTGAATACTAATGCCCCCAACTATCCCTATTAATCATTACATCGATCCTAGAAACCAACAAAATAGAATCAAACG	AY903711	371	8.43891e-156	0.97	1	387	0	0	0	0	0	6	0	0	0	0	0	13	1	0	0	0	1	0	0	0	0	0	0	0	0	0	0	0
S1196_0585	Basidiomycota	Fungi_other	TCCTGTGTTGAGTCAAATTAAGCTGCAGGCTCCACTCCTGGTGGTGCCTTCCGTCAATTCCTTTAAGTTTCAGCCTTGCAACCATACTCCCCCCAGTACCCAAAGACTTTGATTTCTCATAAAATGCTGAACAAGTCATGATAACATTGTTCAATCCCTAGTCAGCATAGTTTATGGTCAAGACTACAACAGTATCTGATCGTTTTCGATCCCCTAACCTTCGTTCTTGATTAATGAAAACATCCTTGGCAAATGCTTTCGCAGAAGTTCGTCTTCAGCAAATCCAAGAATTTCACCTCTAGCAGCTGAATACGAATGCCCCCAACTGTCCCTATTAATCATTACGGCGACTCTAGAAACCAACAAAATAGAACCGCACG	DQ663693	321	1.16449e-133	0.92	2	380	0	0	0	0	0	0	0	0	0	0	0	0	0	2	0	0	0	0	0	0	0	0	0	0	0	0	0	0
S1196_0587	Ascomycota	Fungi_other	TCCCGTGTTGAGTCAAATTAAGCCGCAGGCTCCACTCCTGGTGGTGCCCTTCCGTCAATTCCTTTAAGTTTCAGCCTTGCGACCATACTCCCCCCGGAACCCAAAAACTTTGATTTCTCCTACGGTGCCGGGCGCGTCAGACAACAGCGCCCGATCCCGAGTCGGCATCGTTTATGGTTAAGACTACGACGGTATCTAATCGTCTTCGATCCCCTAACTTTCGTTCTTGATTAATGAAAACATCCTTGGCAGATGCTTTCGCAGACGTTTGTCTTTCGGGAATCCAAGAATTTCACCTCTGACACCGAAATACAAATGCCCCCAACTATCCCTATTAATCATTACCGTGGTCCTAGAAACCAACAAAATAAGACCAAGG	AY640996	319	8.9283e-133	0.92	2	376	0	0	0	0	0	0	0	0	0	0	0	0	0	0	0	0	0	0	0	0	0	0	0	4	0	1	0	0
S1196_0588	Chytridiomycota	Chytridiomycetes	TCCCGTGTTGAGTCAAATTAAGCCGCAGGCTCCAAGCCTGGTTGTGCCCTTCCGTCAATTCCTTTAAGTTTCAGCCTTGCGACCATACACCCCCCAGAACCCAAAAACTTGTGATTTCTCCTAAGGTGCCGACGGGGTTTGGGAACACCCGCCGATCCCTAGTCGGCATAGTTTATGGTTAGGACTACGACGGTATCTGATCGTCTTCGATCCCCTAACTTTCGTTCTTGATTAATGAAAACATCCTTGGCAAATGCTTTCGCAGAAGTTAGTCTTTCATAAATCCAAGAATTTCACCTCTGACAATTAAATACTAATGCCCCCAACTATCCCTATTAATCATTACTTCGGTCCCGGAAACCAACAAAATAGAACCAAAG	DQ536473	336	2.63893e-140	0.94	2	380	0	0	0	5	3	0	0	0	0	1	0	0	7	0	0	0	0	0	0	2	2	10	0	0	0	0	0	2
S1196_0592	Basidiomycota	Agaricomycetes	CCCTGTGTTAACCTGCAGGCTCCACTCCTGGTGGTGCCCTTCCATCAACTCCTTTAAGTTTCAGCCTTGCAACCATACTCCCCCCAGAACCCAAAGACTTTGATTTCTCGTAAGGTGCCGAGTGCCACATAATATTGAGTTCACTTGATCCCTAGTTGGTATAGTTTACTGTTAAGACTACAACGGTATCTGATCATTTTTGATCCCCTAACCTTCGTTCTTGATTAATGAAAACATCCTTGGCAAATGCTTTTGCAGTAGTTAGTCTTCAGTAAATCCAAGAATTTCACCTCTAGCAACTGAATACTAATGCCCCCAACTGTCCCTATTAATCATTATGGTGACTCTAGAAACCAACAAAATAGAACTGCACA	DQ435797	338	3.3686e-141	0.96	8	373	0	0	0	0	0	0	0	0	0	0	0	0	0	0	0	0	0	0	0	0	0	0	0	16	0	0	0	0
S1196_0594	Ascomycota	Dothideomycetes	CCCCGTGTTGAGTCAAATTAAGCCGCAGGCTCCACGCCTGGTGGTGCCCTTCCGTCAATTTCTTTAAGTTTCAGCCTTGCGACCATACTCCCCCCAGAACCCAAAAACTTTGATTTCTCGTACGGTGCCGATGGAGTCAAATAAGAAACGTCCACCGATCCCGAGTCGGCATAGTTTATGGTTAAGACTACGACGGTATCTGATCGTCTTCGATCCCCTAACTTTCGTTCACTGATTAATGAAAACATCCTTGGCAAATGCTTTCGCAGTAGTTAGTCTTCAATAAATCCAAGAATTTCACCTCTGACAATTGAATACTGATGCCCCCGACTATCCCTATTAATCATTACGGCGGTCCTAGAAACCAACAAAATAGAACCGCACG	GU214611	381	3.11804e-160	0.99	1	385	0	0	0	2	0	0	16	0	0	0	1	1	5	1	1	0	0	0	0	0	0	1	0	1	0	0	0	0
S1196_0595	Basidiomycota	Fungi_other	TCCCGTGTTGAGTCAAATTAAGCCGCAGGCTCCACTCCTGGTGGTGCCCTTCCGTCAATTCCTTTAAGTTTCAGCCTTGCGACCATACTCCCCCCAGAACCCAAAGACTTTGATTTCTCGTAAGGTGCCGATTCAGTCAAAAAAATAACTTGGACCGATCCCACCGATCCCTAGTCGGCATAGTTTACTGCCAAGACTACAACGGTATCTAATCGTTTTTGATCCCCTAACCTCGTTCTTGATTAACGAAACTATTCTTGGCAAAAGCTTTCGCAGTAGTTAGTCTTCAGTAAATCCAAGAATTTCACCTCTAGCAACTGAATACTAATGCCCTCGACTATCCCTATTAATTATTACGGCGATCCTAGAAACCAACAAAATAGAACCGCACG	JX242889	336	2.73548e-140	0.94	2	392	0	0	0	0	0	3	0	0	0	0	0	0	0	0	0	0	0	0	0	0	0	0	0	0	0	0	0	1
S1196_0597	Ascomycota	Sordariomycetes	TCCCGTGTTGAGTCAAATTAAGCCGCAGGCTCCACTCCTGGTGGTGCCCTTCCGTCAATTTCTTTAAGTTTCAGCCTTGCGACCATACTCCCCCCGGAACGCAGAAGCTTGTACTTTCGTGTAAGGTGCCGAGCGGGTCAAAAAATAACACCGCCCGATCCCTAGTTCGCATAGTTTATGGTTAAGACTACGACGGTATCTGATCGTCTTCGATCCCCTAACTTTCGTTCCTGATTAATGAAAACATCCTTGGCAAATGCTTTCGCAGTAGTTCGTCTTCCATAAATCCAAGAATTTCACCTCTGACAATGGAATACGGATGCCCCCGACTGTCCCTATTCATCATTACGGCGGTCCTAGAAACCAACAAAATAGAACCGCGCG	DQ470998	355	1.02345e-148	0.96	2	384	1	0	3	2	2	0	0	2	0	0	9	5	0	1	3	0	1	1	18	0	0	1	1	22	0	1	2	0
S1196_0600	Zoopagomycota	Zoopagomycetes	CCCCGTGTTGAGTCAAATTAAGCCGCAGGCTCCACTCCTGGTGGTGCCCTTCCGTCAATTCCTTTAAGTTTCAGCCTTGCGACCATACTCCCCCCGGAGCCTAAAAACTTTGATTTCTCGAAAGGTGCCGAGCGGGTCATAAAAGAATAACTCCGCCCGATCCCTAGTCGGCATAGTTTATGGTTAAGACTACGACGGTATCTAATCGTCTTCGATCCCCTAACTTTCGTTCTTGATTAATGAAAACATCCTTGACAAATGCTTTCGCAATAGTTCGTCTTTAATAGATCCAAGAATTTCACCTCTGACAATTAAATACGAATGTCCCCAACTGTCCCTATTAATCATTACCGTAGTTCTCAAGACCAACAAAATAGAACCGCAG	DQ643781	347	3.59099e-145	0.95	1	381	13	32	2	21	19	10	4	0	0	0	3	21	6	4	7	0	12	0	0	0	0	5	4	1	5	6	0	2
S1196_0601	Ascomycota	Sordariomycetes	CCCCGTGTTGAGTCAAATTAAGCCGCAGGCTCCACTCCTGGTGGTGCCCTTCCGTCAATTTCTTTAAGTTTCAGCCTTGCGACCATACTCCCCCCGGAACGCAGAAGCTTATACTTTCGCGTAAGGTGCCGAAGGGGTCAAAAAATAACACCCTCCGATCCCTAGCTCGCATAGTTTATGGTTAAGACTACGACGGTATCTGATCGTCTTCGATCCCCTAACTTTCGTTCCTGATTAATGAAAACATCCTTGGCGAATGCTTTCGCAGTAGTTGGTCTTCAATAAATCCAAGAATTTCACCTCTGACAATTGAATACCGACGCCCCCGACTGTCCCTATTAATCATTACTGCGGTCCTAGAAACCAACAAAATAGAACCTCAG	DQ470998	348	1.28712e-145	0.95	1	382	0	0	0	0	0	0	0	0	0	0	3	5	0	0	0	0	0	0	0	0	0	2	2	0	0	0	0	0
S1196_0603	Basidiomycota	Fungi_other	TCCATGTTGAGTCAAATTAAGCTGCAGGCTGCACTTCTGGTGGTGCCCTTCCATCAATTCCTTTAAATGTCAGCCTTGTGACCATACTCCCCCCAAAATCCAAATACTTTGATTTCTCATAAGGTGCTGAGCAACACATTAAAAAGAGGTCACTTGATCCCTAGTCAGCATTGTTTACTGTTAAGACTACAATGGTATCTGATTGTTTTTGATCTCCTAACCTTTGTTTTTGATTAATGAAAACATTCTTGGCAAATGCTTTTGCAATAGTTAGTCTTCAGTCAATCCAAGAATTTCACCTCTAGTGACTGAATACTAATGCCCCCAACTGTCCCTATTAATCATTACAGCGACTCTAGAAACCAACAAAATAGAACCACACA	DQ534676	319	9.03751e-133	0.91	2	382	0	0	0	0	22	0	0	0	0	0	0	0	4	0	0	0	0	0	0	0	0	0	0	0	0	0	0	0
S1196_0604	Chytridiomycota	Chytridiomycetes	CCCCGTGTTGAGTCAAATTAAGCCGCAGGCTCCACTCCTGGTGGTGCCCTTCCGTCAATTCCTTTAAGTTTCAGCCTTGCGACCATACTCCCCCCGGAACCCAAAAACTTTGATTTCTCATAAGGTGCCGAATGGATTGTAAGAAACGTCCATCCGATCCCTAGTCGGCATAGTTTATGGTTAAGACTACGACGGTATCTAATCGTCTTCGATCCCCTAACTTTCGTTCTTGATTAATGAAAACATCCTTGCCAAGTGCTTTCGCAGTAGTTCGTCTTTCGTAAATCCAAGAATTTCACCTCTGACAACGAAATACGGATGGCCCCAACTGTTCCTATTAATCATTACCTTGGTCCTAGAAACCAACAAAATAGAACCACGGTCCTATTTTATTATTCC…	HQ901748	344	8.1187e-144	0.93	2	405	0	5	0	4	0	0	0	0	0	0	0	0	0	0	0	0	0	0	0	0	0	0	0	0	0	0	0	0
S1196_0607	Chytridiomycota	Chytridiomycetes	CCCCGTGTTGAGTCAAATTAAGCCGCAGGCTCCACTCCTGGTGGTGCCCTTCCGCCAATTCCTTTAAGTTTCAGCCTTGCGACCATACTCCCCCGGAACCCAAAAACTTTGATTTCTCATAAGGTGCCGAACGAGTCAAAAAAACGTCGTCCGATCCCTAGTCGGCATAGTTTATGGTTAAGACTACGACGGTATCTGATCGTCTTCGATCCCCTAACTTTCGTTCTTGATTAATGAAAACATCCTTGGCAAATGCTTTCGCAGAAGTCAGTCTTTCATAAATCCAAGAATTTCACCTCTGACAATTAAATACTAATGCCCCCAACTATCTCTACTAATCATTACTTCGGTCCTAGAAACCAACAAAATAGAACCAAAG	FJ848516	358	4.72644e-150	0.97	1	379	6	1	10	9	6	6	0	0	0	1	0	7	0	4	0	1	5	0	1	0	0	0	0	7	1	0	0	1
S1196_0608	Basidiomycota	Atractiellomycetes	CCCCGTGTTGAGTCAAATTAAGCCGCAGGCTCCACACCTGGTGGTGCCCTTCCGTCAATTCTTTTAAGTTTCAGCCTTGCGACCATACTCCCCCCCGAACCTAAACTTAAAGATTTCTCTTCGGGTGCTGAGCCAGCCATTTATATTACTGACCCAATCCCCAGTCGGCATAGTTTACTGTTAAGACTACAACGGTATCTGATCGTTTTCGATCCCCTAACCTTCGTTCTTGATCAATGAAAACATCCTTGGCAAATGCTTTCGCAGTAGTTCGTCTTCAATAAATCCAAGAATTTCACCTCTAGCAATTGAATACGAATGCCCCCAACTATCCCTATTAATCATTACGGCGATCCTAGAAACCAACAAAATAAGACCGCGCG	DQ198798	364	1.0518e-152	0.98	1	380	0	0	0	0	0	0	0	0	0	0	0	0	0	15	0	0	0	0	0	0	0	0	0	0	0	0	1	0
S1196_0611	Basidiomycota	Fungi_other	CCCGCAATTTGAGGGTCTTGCCTATGAAAAATAACATAGACTAGCATTTAATTTTACAAGGACAAACCACCTCACCCTTTCAGGCTGCTGTTTGGTGCAGAGCTACTGCGGCTGAGCTGTAACAGTTTACACCTGGTGGTGCCCTTCCGTCAATTCCTTTAAGTTTCAGCCTTGCGACCATACTCCCCCCAGAACCCAAAGACTTTGATTTCTCGTAAGGTGCCGAATGACACATAATAATTGAGGTCATCCGATCCCTAGTCGGCATAGTTTACTGTTAAGACTACAACGGTATCTAATCGTTTTCGATCCCCTAACCTTCGTTCTTGATTAATGAAAACATCCTTGGCAAATGCTTTCGCAATAGTTGGTCTTGAGTCAATCCAAGAATTTCACCTC…	KJ137267	413	2.66646e-174	0.93	1	480	0	0	0	0	0	0	0	0	0	0	0	0	0	0	0	0	0	0	0	0	0	0	0	0	0	0	0	0
S1196_0613		Fungi_other	CCCCGTGTTGAGTCAAATTAAGCCGCAGGCTCCACGCACTGAGTCCCTAAGCTGATTGCTTAGGGGTCGATCATATCATAAGTGGTCCCCTATGGGACCACCGGCCACCACTTGATCTGTGGACCGAAGCCCCCATCGTTGAGGGTCGGCTGCGGGTACGTCTCGCAGCAGAGCTGAGACAGTCCACGCAATTCAAAGGCCTCACCACCCCGGAACGGGGGGCTAATTCTAGTTGTTACCAGGCGT	AY622845	200	2.76362e-80	0.91	1	246	0	0	0	0	0	0	0	0	0	0	0	0	0	0	0	0	0	0	0	0	0	0	0	0	0	0	0	0
S1196_0614	Cryptomycota	Cryptomycota	TCCCGTGTTGAGTCAAATTAAGCCGCAGGCTCCACTCCTGGTGGTGCCCTTCCGTCAATTCCTTTAAGTTTCGGACTTGCGACTATACTCCCCCCAGAACCCAAAAACTTTGATTTCTCGTAAGGTGCTGATAAAGTCAAATACGACATTCACCAATCCCTAGTCGGCATAGTTTATGGTTAAGACTACGACGGTATCTAATCGTCTTCGATCCCCTAACTTTCGTTCTTGATTAATGAAAACATCCTTGGCAAATGCTTTCGCAGTAGTTAGTCTTCCGAAAATCCAAGAATTTCACCTCTAGCTTCGGAATACTAATGCCCCCAACTGTCCCTATTCATCATGACATTGGTCCTTAAACCAACAAAATAGAACCAAAG	AF372713	331	4.32843e-138	0.93	1	380	0	0	0	0	0	0	0	0	0	0	1	0	0	6	1	0	0	0	0	0	0	0	1	0	0	2	0	0
S1196_0615	Ascomycota	Fungi_other	TCCCGTGTTGAGTCAAATTAAGCCGCAGGCTCCACTTCTGGTGGTGCCCTTCCGTCAATTCCTTTAAGTTTCAGCCTTGCGACCATACTCCCCCCAGAACCCAAAAACTTTGATTTCTCGTAAGGTGCCGACGGAGTCAATAAAACAACGTCCGCCGATCCCTAGTCGGCATAGTTTATGGTTAAGACTACGACGGTATCTGATCGTCTTCGATCCCCTAACTTTCGTTCCTGATTAATGAAAACATCCTTGACGAATGCTTTCGCAGTAGTTAGTCTTCAATAAATCCAAGAATTTCACCTCTGACAATTGAATACTAGCGCCCCCGACTGTCCCTATTAATCATTACGGCTTTCTTAAAAACCAACAAAATAAGAAAAACGTCCTATTTTATTATTC…	EU647053	354	3.02629e-148	0.93	2	406	18	0	4	2	1	0	23	0	0	0	1	0	0	9	0	2	3	38	0	0	8	0	1	12	0	13	0	1
S1196_0617	Ascomycota	Lecanoromycetes	CCCCGTGTTGAGTCAAATTAAGCCGCAGGCTCCACTCCTGGTGGTGCCCTTCCGTCAATTTCTTTAAGTTTCAGCCTTGCGACCATACTCCCCCCAGAACCCAAAAACTTTGATTTCTCGTAAGGTGCCGAACGGGGCACTTGTAACCACCGTCCGATCCCTAGTCGGCATAGTTTACGGTTAAGACTACGACGGTATCTGATCGTCTTCGATCCCCTAACTTTCGTTCACTGATTAATGAAAACATCCTTGGCAAATGCTTTCGCAGTAGATAGTCTTCAATAAATCCAAGAATTTCACCTCTGACAATTGAATACTGATGCCCCCGACTATCCCTATTAATCATTACGGCGGTCCTAGAAACCAACGAAATAAGAACGACG	AY641016	353	7.84723e-148	0.96	1	382	0	0	0	0	0	0	0	0	0	0	1	0	0	0	0	0	0	0	0	0	0	1	0	4	0	0	0	0
S1196_0618	Chytridiomycota	Chytridiomycetes	TCCCGTGTTGAGTCAAATTAAGCCGCAGGCTCCACTCCTGGTGGTGCCCTTCCGTCAATTCCTTTAAGTTTCAGCCTTGCGACCATACTCCCCCCGGAGCCTAAAAACTTTGATTTCTCATCAAGGTGCCGAGCAAGTCAGAAAAGTAACATTGCCCGATCCCTAGTCGGCATAGTTTATGGTTAAGACTACGACGGTATCTAATCGTCTTCGATCCCCTAACTTTCGTTCTTGATTAATGAAAACATCCTTGGCAAATGCTTTCGCAGTTGTTAGTCTTTCCTAAATCCAAGAATCTAACCTCTGACGGCTAAATACTAATGCCCCCAACTATCCCTATTAATCATTACTTCGGTCCTAGAAACCAACAAAATAAAACCAAAGTCCTATTTCATTATT…	DQ643792	359	1.84506e-150	0.94	2	406	9	1	0	3	4	1	0	0	0	0	3	63	2	1	0	3	1	21	4	1	1	3	1	0	0	0	0	0
S1196_0619	Basidiomycota	Agaricomycetes	CCCCCTGTTGAGTCAAATTAAGCCGCAGGCTCCACGCCTGGTGGTGCCCTTCCGTCAATTCCTTTAAGTTTCAGCCTTGCGACCATACTCCCCCCAGAACCCAAAGACTTTGATTTCTCGTAAGGTGCCGAGCGACACATGATAGTGAGATCGCCCGATCCCTAGTCGGCATAGTTTACTGTTAAGACTACAACGGTATCTGATCGTTTTCGATCCCCTAACCTTCGTTCTTGATTAATGAAAACATCCTTGGCAAATGTTTTCGCAGAAGTTAGTCTTCCGTAAATCCAAGAATTTCACCTCTAGCAACGGAATACTAATGCCCCCAACTATCCCTATTAATCATTACGGCGACTCTAGAAACCAACAAAATAGAACCGCACG	DQ457627	376	5.09892e-158	0.98	1	384	1	11	1	23	5	21	2	0	0	1	6	70	26	19	1	1	17	5	2	10	26	3	2	1	0	2	2	1
S1196_0621	Basidiomycota	Agaricomycetes	CCCCGTGTTGAGTCAAATTAAGCCGCAGGCTCCACTCCTGGTGGTGCCCTTCCGTCAATTCCTTTAAGTTTCAGCCTTGCGACCATACTCCCCCCAGAACCCAAAAACTTTGATTTCTCTTAAGGTGCCGAGCGAGTCATTTGAAACTGCGCCCGATCCCTAGTCGGCATAGTTTACTGTTAAGACTACAACGGTATCTGATCGTTTTCGATCCCCTAACCTTCGTTCTTGATTAATGAAAACATCCTTGGCAAATGCTTTCGCAGAAGTTTGTCTTCCGTAAATCCAAGAATTTCACCTCTAGCAACGGAATACAAATGCCCCCAACTATCCCTATTAATCATTACGGCGACTCTAGAAACCAACAAAATAGAACCGCACG	AY360775	355	1.01728e-148	0.96	1	382	7117	4	3	4	0	1	2	7	0	1	66	6	15	42	4	1	4	0	5	3	8	0	0	15	2	1	0	7
S1196_0622	Ascomycota	Fungi_other	CCCCGTGTTGAGTCAAATTAAGTCGCAGGCTCCACTCCTGGTGGTGCCCTTCCATCAATTCCTTTAAGTTTCAGCCTTGTGACCATACTCCCCCCAGAACCCAAAAACTTTGATTTCTCTTAAGGTACCGAGCGAGTCAATTTGACACTGCGCCCGATCCCTAGTCGGCATGGTTTATGGTTAAGACTACGACGGTATCTAATCATCTTCGATCCCCTAACTTTCGTTCTTGATTAATGAAAACATCCTTAGCAAATGCTTTTGCAGTAGTTAGTCTTCAATAAATCCAAGAATTTCACCTCTGACAATTGAATACTAATGCCCCCAGCTATCCCTATTAATCATTATGGCGGTCCTAGAAACCAACAAAATAGGATCGACG	AY124370	330	1.20768e-137	0.94	1	374	0	0	0	0	0	0	0	0	0	0	0	11	1	0	0	0	0	0	0	0	0	0	0	0	0	0	0	0
S1196_0623	Ascomycota	Fungi_other	TCCCGTGTTGAGTCAAATTAAGCCGCAGGCTCCACGCCTTGTGGTGCCCTTCCGTCAATTTCTTTAAGTTTCAGCCTTGCGACCATACTCCCCCCTATAGATAAAAATGTTAGCAAATGTAAATCAAACGCGGAACAAAACCATAACCAAATAAGACTTACCAGAGCCCAAACACTTTGATTTCTCGTAAGGTGCCGAACGGGTCATATAAAAAACGCCGTCCGATCCCTAGTCGGCATAGTTTATGGTTAAGACTACGACGGTATCTGATCGTCTTCGATCCCCTAACTTTCGTTCACTGATTAATGAAAACATCCTTGGCGAATGCTTTCGCAGTAGTTAGTCTTCAATAAATCCAAGAATTTCACCTCTGACAATTGAATACTGACGCCCCCGACT…	JQ301604	333	6.73487e-139	0.88	2	446	0	0	0	0	0	0	0	0	0	0	0	0	0	4	0	0	87	0	0	0	0	0	0	0	0	0	0	0
S1196_0625	Ascomycota	Sordariomycetes	CCCCGTGTTGAGTCAAATTAAGCCGCAGGCTCCACCCCTGGTGGTGCCCTTCCGTCAATTTCTTTAAGTTTCATCGTTGCCGACGTATTTCCCCAGGAGCCTCGTTTGTACTTTCGTGTAAGGTGCCGGACGGGTCACAAAATAACACCGTCCGATCCCTAACAGGCATAGTTTACGGTTAAGACTACGACGGTATCTGATCGTCTTCGATCCCCTAACTTTCGTTCCTGATTAATGAAAACATCCTTGGCGAATGCCTTCGCAGTAGTTAGTCTTCAATAAATCCAAGAATTTCACCTCTGACAATTGAATACTGACGCCCCCGACTGTCCCTATTAATCATTACGGCGGTCCTAGAAACCAACAAAATAGAACCGCGCG	AF050474	371	8.28777e-156	0.98	1	381	0	8	0	0	5	0	14	0	0	0	0	8	9	45	0	0	0	0	0	0	1	0	0	0	0	0	0	0
S1196_0626	Entomophthoromycota	Entomophthoromycetes	TCCCGTGTTGAGTCAAATTAAGCCGCAGGCTCCACTCCTGGTGGTGCCCTTCCGTCAATTCCTTTAAGTTTCAGCCTTGCGACCATACTCCCCCCAGAACCCAAAGACTTTGATTTCTCATAGAGTGCCGGGCAAGTCATTTAGAATAACATTGCCCGATCCTCAGTCGGTATAGTTTATGGTTAGGACTACGACGGTATCTGATCGTCTTTGATCCCCTAACTTTCGTTCTTGATCAATGGGAACATCCTTGGCAAATGCTTTCGCAGAAGTTAGTCTTTGATAAATCCAAGAATTTCACCTCTAGCAATCAAATACTAATGCCCCCAACTGTCCCTATTAATCATTACTTTGGTTCTAGAAACCAACAAAATAGAACCAAGGTCCTATTTCATTATT…	AF368505	347	3.82824e-145	0.93	2	407	2	0	0	0	0	0	3	0	0	0	1	0	0	0	0	0	0	0	5	0	0	0	0	0	0	0	0	0
S1196_0627	Ascomycota	Eurotiomycetes	TCCCGTGTTGAGTCAAATTAAGCCGCAGGCTCCACGCCTTGTGGTGCCCTTCCGTCAATTTCTTTAAGTTTCAGCCTTGCGACCATACTCCCCCCTATAGATAGAAAGTTAGTGAATGCTAGATGGGGGGTGCATTTCATGTATATAAATGTGTATTTTAAGAAATTTGAGACTTACCAGAGCCCAAACACTTTGATTTCTCGTAAGGTGCCGAACGGGTCATATAAAAAACGCCGTCCGATCCCTAGTCGGCATAGTTTATGGTTAAGACTACGACGGTATCTGATCGTCTTCGATCCCCTAACTTTCGTTCACTGATTAATGAAAACATCCTTGGCGAATGCTTTCGCAGTAGTTAGTCTTCAATAAATCCAAGAATTTCACCTCTGACAATTGAAT…	FJ358326	268	4.41226e-110	0.96	177	464	0	0	0	0	0	0	0	0	0	0	0	0	0	94	0	0	0	0	0	0	0	0	0	0	0	0	0	0
S1196_0628	Ascomycota	Sordariomycetes	CCCCGTGTTGAGTCAAATTAAGCCGCAGGCTCCACCCCTTGTGGTGCCCTTCCGTCAATTCCTTTAAGTTTCAGCCTTGCGACCATACTCCCCCCAGAACCCAAAAACTTTGATTTCTCGTAAGGTGCCGAATGAGTCAAAAAAGAACATCATCCGATCCCTAGTCGGCATAGTTTATGGTTAAGACTACGACGGTATCTGATCGTCTTCGATCCCCTAACTTTCGTTCTTGATTAATGAGAACATCCTTGGCAAATGCTTTCGCAGTAGTTAGTCTTCAATAAATCCAAGAATTTCACCTCTGACAATTGAATACTGATGCCCCCGACTGTCCCTATTAATCATTACGACGGTCCTAGAAACCAACAAAATAGAACCATACG	AF515370	361	2.24323e-151	0.97	1	383	129	1	0	6	1	1	17	11	0	11	40	0	4	1	2	0	0	0	0	0	0	0	98	8	1	18	0	0
S1196_0630	Ascomycota	Sordariomycetes	CCCCGTGTTGAGTCAAATTAAGCCGCAGGCTCCACCCCTGTAAATAAAGTTAGCATCTCATCTCCTGTAAAAAGTAGCGAATAGGGTTGTAATGGCTTACCTGGTGGTGCCCTTCCGTCAATTTCTTTAAGTTTCAGCCTTGCGACCATACTCCCCCCAGAACCCAGAAACTTGTACTTTCGTGTAAGGTGCCGAACGAGTCAAAAAATAACATCGTCCGATCCCTAGTCGGCATAGTTTATGGTTAAGACTACGACGGTATCTGATCGTCTTCGATCCCCTAACTTTCGTTCCTGATTAATGAAAACATCCTTGGCAAATGCTTTCGCAGTAGTTAGTCTTCAATAAATCCAAGAATTTCACCTCTGACAATTGAATACTGATGCCCCCGACTGTCCC…	AF279373	348	1.53013e-145	1	100	447	0	0	0	0	16	0	0	0	0	0	0	0	0	0	0	0	0	0	0	0	0	0	0	0	0	0	0	0
S1196_0632	Ascomycota	Sordariomycetes	CCCCGTGTTGAGTCAAATTAAGCCGCAGGCTCCACTCCTGGTGGTGCCCTTCCGTCAATTTCTTTAAGTTTCAGCCTTGCGACCATACTCCCCCCGGAACTCAGAAACTTGTAATTTCTTGTAAGGTGCCGAACGAGTCAACATATAACATCGTCCGATCCCTAGTCAGCATAGTTTACGGTTGAGACTACGACGGTATCTGATCGTCTTCGATCCCCCAACTTTCGTTCCTGATTAATGAAAACATCCTTGGCGAATGCTTTCGCAGTAGTTAGTCTTCAATAAATCCAAGAATTTCACCTCTGACAATTGAATACTGACGCCCCCGACTGTCCCTATTAATCATTACGGCGGTCCCGGAAACCAACAAAATAGAACCGCACATCCTATTCCATTATT…	AF279373	375	1.51199e-157	0.96	1	407	0	0	0	0	0	0	0	0	0	0	1	0	0	1	1	0	0	0	0	0	7	2	0	0	4	1	0	0
S1196_0633	Ascomycota	Sordariomycetes	CCCCGTGTTGAGTCAAATTAAGCCGCAGGCTCCACCCCTGGTGGTGCCCTTCCGTCAATTTCTTTAAGTTTCAGCCTTGCGACCATACTCCCCCCAGAACCCAGAAACTTATACTTTCGTGTAAGGTGCCGAACGGGTCAAAAATGAACACCGTCCGATCCCTAGTCGGCATAGTTTATGGTTAGGACTACGACGGTATCTGATCGTCTTCGATCCCCTAACTTTCGTTCCTGATTAATGAAAACATCCTTGGCAAATGCTTTCGCAGTAGTTAGTCTTCAATAGATCCAAGAATTTCACCTCTGACTATTGAATACTGATGCCCCCGACTGTCCCTATTAATCATTACGGCGGTCCTAGAAGCCAACAAAATAAGACTGCCG	AY858662	365	3.79273e-153	0.97	1	381	0	1	0	55	0	11	32	1	0	0	2	0	1	1	0	0	0	0	0	1	0	0	1	1	0	0	0	5
S1196_0634	Chytridiomycota	Fungi_other	CCCCGTGTTGAGTCAAATTAAGCCGCAGGCTCCACTCCTGGTGGTGCCCTTCCGTCAATTCCTTTAAGTTTCAGCCTTGCGACCATACTCCCCCCAGAACCCAAAGACTTATGGTTTCCCAGAAGGTGCCAGAGAGGACATTAAAACATAAACGCTCTCTGATCCCTGGTCGGCATAGTTTATGGTTAAGACTACGACGGTATCTGATCATCTTCGATCCCCTAACTTTCGTTCTTGATTAATGAAAACATCCTTGACAAATGCTTTCGCTGAAGTTCGTCTTTAATAAATCCAAGAATTTCACCTCTGACAATTAAATACGAATGCCCCCGACTGTCCCTTTTAATCATTACTCTGATCTTGAAAACCAACGAAAGACACGAAGCGGAGGGGCGCGAG…	HQ901772	307	2.28497e-127	0.91	2	376	1	0	0	0	0	11	0	0	0	0	0	0	3	0	0	0	0	0	0	0	0	0	0	0	0	2	0	0
S1196_0635	Chytridiomycota	Chytridiomycetes	CCCCGTGTTGAGTCAAATTAAGCCGCAGGCTCCAAACCTGGTGTGCCCTTCCGTCAATTCCTTTAAGTTTCAGCCTTGCGACCATACACCCCCCAGAACCCAAAAACTTATGATTTCTCCTACGGTGCCGATGAGGTCAATAGGTAAAACGCTCACCGATCCCGAGTCGGCATAGTTTATGGTTAGGACTACGACGGTATCTAATCGTCTTCGATCCCCTAACTTTCGTTCTTGATTAATGAAAACATCCTTGGCAAATGCTTTCGCAGAAGTTAGTCTTTCATAAATCCAAGAATTTCACCTCTGACAATTAAATACTAATGCCCCCAACTGTCCCTATTAATCATTATTTCGGTCCTAGAAACCAACAAAATAAGACCAAAG	HQ901772	332	1.57984e-138	0.94	2	384	0	0	0	0	1	5	0	0	0	0	0	4	0	0	0	0	0	0	0	0	0	0	0	0	0	0	0	0
S1196_0637	Chytridiomycota	Chytridiomycetes	CCCCGTGTTGAGTCAAATTAAGCCGCAGGCTCCACTCCTGGTGGTGCCCTTCCGTCAATACCTTTAAGTTTCAGCCTTGCGACCATACTCCCCCCGGAACCCAAAGACTTTGATTTCTCATAAGGTGCCGATGGAGTCGTAAAGTAACATCCACCGATCCCTAGTCGGCATATTTATAGTTAAGACTACGACGGTATCTGATCGTCTTCGATCCCCTAACTTTCGCTCTTGATTAATGAAAACATCCTTGGCAAATGCTTTCGTAGAAGTTCGTCTTTCATAAATCCAAGAATTTCACCTCTGACAATTAAATACGAATGCCCCCAACTATCCCTATTAATCATTACTTCGGTCCTAGAAACCAACAAAATAGGAGACCAAAG	JN020240	343	2.11115e-143	0.95	1	383	0	0	0	0	0	0	0	2	0	2	0	0	0	0	0	2	0	0	0	0	0	0	0	0	0	0	0	0
S1196_0638	Ascomycota	Eurotiomycetes	CCCCGTGTTGAGTCAAATTAAGCCGCAGGCTCCACTCCTGGTGGTGCCCTTCCGTCAATTCCTTTAAGTTTCAGCCTTGCGACCATACTCCCCCCAGAACCCAAAAACTTTGATTTCTCGTAAGGTGCCGAGCGGGTCATCATAGAAACACCGCCCGATCCCTAGTCGGCATAGTTTATGGTTAAGACTACGACGGTATCTGATCGTCTTCGATCCCCTAACTTTCGTTCCCTGATTAATGAAAACATCCTTGGCGAATGCTTTCGCAGTAGTTAGTCTTCAGCAAATCCAAGAGTTTCACCTCTGACAGCTGAATACTGACGCCCCCGACTATCCCTATTAATCATTACGGCGGTCCTAGAAACCAACAAAATAGAACCGCACG	M60300	377	1.84418e-158	0.98	1	385	31	40	9	29	101	85	1172	19	1	2	29	13	14	10	159	5	6	15	10	1194	18	13	3976	54	175	10	12	9
S1196_0639	Chytridiomycota	Chytridiomycetes	CCCCGTGTTGAGTCAAATTAAGCCGCAGGCTCCACTCCTGGTGGTGCCCTTCCGTCAATTCCTTTAAGTTTCAGCCTTGCGACCATACTCCCCCCAGAACCCAAAAACTTTGATTTCTCATAAGGTGCCGATGGAGTCATCAAAAAAACGTCCACCGATCCCTAGTCGGCATAGTTTATGGTTAGGACTACGACGGTATCTAATCGTCTTCGATCCCCTAACTTTCGTTCTTGATTAATGAAAACATCCTTGGCAGATGCTTTCGCAGAAGTTAGTCTTTCATAAATCCAAGAATTTCACCTCTGACAATTAAATACTAATGCCCCCAACTATCCCTATTAATCATTACTGCGGTCCCAGAAACCAACGAAAAAACAGAACCAAAG	JN020240	346	9.98843e-145	0.95	1	386	0	0	3	3	0	0	0	0	0	0	1	2	1	4	0	1	4	0	0	0	0	1	0	0	0	1	0	0
S1196_0642	Chytridiomycota	Chytridiomycetes	CCCCGTGTTGAGTCAAATTAAGCCGCAGGCTCCACACCTGGTGGTGCCCTTCCGTCAATTCCTTTAAGTTTCAGCCTTGCGACCATACTCCCCCCGGTACCCAAAGACTTTGATTTCTCATAAGGTGCTGAACGAGTCATGAAAACATCGTCCAATCCCTAGTCGGCATAGTTTATGGTTAAGACTACGACGGTATCTAATCGTCTTCGATCCCCTAACTTTCGTTCTTGATTAATGAAAACATCCTTGGCAAATGCTTTCGCAGAAGTTAGTCTTTCATAAATCCAAGAATTTCACCTCTGACAATTAAATACTAATGCCCCCAACTATCCCTATTAATCATTACCTCGGTCCTAGAAACCAACAAAATAGAACCAGGG	DQ536484	369	6.35442e-155	0.98	1	377	0	0	0	4	32	7	0	0	0	0	1	97	8	0	0	0	0	0	0	1	0	29	0	0	0	0	0	0
S1196_0643	Basallineages	Fungi_other	TCCCGTGTTGAGTCAAATTAAGCCGCAGGCTCCACTCCTGGTGGTGCCCTTCCGTCAATTCCTTTAAGTTTCAGCCTTGCGACCATACTCCCCCCGGAACCTAAAAACTTTGATTTCTCTGAAGGTGCCGAACGAGTCATGAAAAATAACGTCGTCCGATCCCTAGTCGGCATAGTTTATGGTTAAGACTACGACGGTATCTGATCGTCTTCGATCCCCTAACTTTCGTTCTTGATTAATGAAAACATCCTTGGCAAATGCTTTCGCATAAGTTTCTCGTTCCGCAGTCCAAGAATTTCACCTCTGGCGCGGAAATAGAAATGCCCCCAACTGACCCTATTAATCATTACTCTGATTCCCAAAACCAACAAAATAGAACCAAAG	DQ536471	321	1.17869e-133	0.91	2	384	8	22	7	4	0	2	16	0	0	2	0	5	2	0	3	0	0	0	0	0	1	1	0	3	0	0	7	2
S1196_0645	Mucoromycota	Mucoromycetes	CCCCGTGTTGAGTCAAATTAAGCCGCAGGCTCCACTCCTGGTGGTGCCCTTCCGTCAATTCCTTTAAGTTTCAGCCTTGCGTCCCATACTCCCCCCAGAACCCAAAGACTTTACTTTCGCTAAGCTGCTGAACCTGACCAAAGGTCAAGGCCCAATCGCTAGTCGGCATAGTTTGTGGTTAAGACTACGACGGTATCTAATCGTCTTCGATCCCTCAACTTTAGTCCCTGATCAATGAAAACGTCCTGGGTCAAATGCTTTCGCAGTAGTTTGTCTTCGGCCAATCCAAGAATTTCACCTCTAGCGGCCAAATACAAATGCCCCCAACCGTTCCTATTCATCATTTCTCAATGTCAAGTAAACCAACAAAACAAGACTCGAGTCCTATTTCATTATTCC…	JQ004925	405	7.72118e-171	1	1	405	13	4	1	19	109	25	27	0	0	0	59	0	0	0	32	0	0	0	0	1344	50	98	103	35	22	70	5	3
S1196_0647	Ascomycota	Sordariomycetes	CCCCGTGTTGAGTCAAATTAAGCCGCAGGCTCCACCGCTTGTGGTGCCCTTCCGTCAATTTCTTTAAGTTTCAGCCTTGCGACCATACTCCCCCTGGAGCCCAAGCACTTTGATTTCTCGTAAGGTGCCGAACGGGTCAAATAATAACACCGTCCGATCCCTAGTCGGCATCGTTTACGGTTAAGACTACGACGGTATCTGATGGTCTTCGATCCCCTAACTTTCGTTCCTGATTAATGAAAACATCCTTGGCAAATGCTTTCGCAGTAGTTAGTCTTCAATAAATCCAAGAATTTCACCTCTGACAATTGAATACTGATGCCCCCGACTGTCCCTATTAATCATTACGGCTGTCCTAGAAACCAACAAAATAGAACAGCGCG	AF515412	377	1.83311e-158	0.99	1	383	1	0	0	2	23	4	37	6	0	0	0	3	3	0	3	0	0	4	0	5	0	5	4	2	0	0	0	0
S1196_0650		Fungi_other	TCCTGTGTTGAGTCAAATTAAGCTGTAGGCTCCACTCCTGGTGGTGCCCTTCCGTTAATTCCTTTAAGTTTCAGCCTTGCGACCATACTCCCCCCAGAACTCAAAGACTTTGATTTCTTGTAAGGTGCCAAGCGACACATTAGAAAGAGGTTGCCTGATCCCTAGTTGGCATTGTTTACTGTTAAGACTACAATGGTATCTGATCATTTTCGATCCCCTAACTTTGTTCTTGATTAATGAAAACATCGTTAGTCTTTAGTCAATCCAAGAATTTCACCTCTAGCGACTGAATACTAATGCCCCCAACTATCCCTATTAATCATTATGGCAACTCTAGAAACCAACAAAATAGAACCACACA	GU187633	269	1.18904e-110	0.88	2	360	0	0	0	0	8	0	0	0	0	0	0	0	0	0	0	0	0	0	0	0	0	0	0	0	0	0	0	0
S1196_0651	Entomophthoromycota	Entomophthoromycetes	TCCCGTGTTGAGTCAAATTAAGCCGCAGGCTCCACTCCTGGTGGTGCCCTTCCGTCAATTCCTTTAAGTTTCAGCCTTGCGACCATACTCCCCCCGGAACCCAAAAACTTTGATTTCTCTTAAGGTGCTGAACTCCTCATAAAATGTGATAGAGTCCAATCCCTAGTTGGCATAGTTTATGGTTGAGACTACGACGGTATCTAATCATCTTCGATCCCCCAACTTTCGTCCTTGATCAATGGGAATGTCCTTGGCAAATGCTTTCGCAGAAGTTAGTCTTTCATAAATCCAAGAATTTCACCTCTGACAATTAAATACTAATGCCCCCAACCATCCCTATTCATCATTACTCTGGTTTTAGAAACCAACAAAATAAAACCAAAGTCCTATTCTATTATT…	JQ014015	349	4.97781e-146	0.94	1	407	0	0	0	0	0	0	0	0	0	0	0	13	0	0	0	0	0	0	0	0	0	0	0	0	0	0	0	0
S1196_0653	Basidiomycota	Pucciniomycetes	CCCCGTGTTGAGTCAAATTAAGCCGCAAGCTCCACGCCTGGTGGTGATCTTCCGTCAATTCCTTTAAGTTTCAGCCTTGCGACCATACTCCCCCCCGAACCTAGACTTAAAGATTTCTCTTCGGGTGCGGATGAAGTCATAGATTGTGCTTCACCCATCCCCAGTCGGCATAGTTTACTGTTAAGACTACAACGGTATCTGATCGTTTTCGATCCCCTAACCTTCGTTCTTGATCAATGAAAACATCCTTGGCAAATGCTTTCGCAGTAGTTCGTCTTCAATAAATCCAAGAATTTCACCTCTAGCAATTGAATACGAATGCCCCCGACTATCCCTATTAATCATTACGGCGATCCTAGAAACCAACAAAATAGAAACGCTCG	AY124480	353	7.84723e-148	0.98	1	365	0	13	0	0	0	0	0	0	0	4	0	0	0	1	0	7	0	65	77	0	0	1	0	0	0	11	2	0
S1196_0655	Ascomycota	Eurotiomycetes	CCCCGTGTTGAGTCAAATTAAGCCGCAGGCTCCACGCCTTGTGGTGCCCTTCCGTCAATTTCTTTAAGTTTCAGCCTTGCGACCATACTCCCCCCCGAGCCCAAAAACTTTGATTTCTCGTAAGGTGCCAAAGGAGGCATAAAAAACCACCCTCTGATCCCTAGTCGGCATAGTTTATGGTTAAGACTACGACGGTATCTGATCGTCTTCGATCCCCTAACTTTCGTTCACTGATTAATGAAAACGTCCTTGATGAATGCTTTCGCAGTAGTTAGTCTTCAATAAATCCAAGAATTTCACCTCTGACAATTGAATACTGACATCCCCGACCATCCCTTTTAATCATTACAGCGGTCCTAGAAACCAACAAAATAGAACCAATG	FJ358292	353	7.84723e-148	0.96	1	379	0	0	0	0	0	0	0	0	0	1	0	0	0	5	0	0	0	0	0	0	0	0	0	0	0	0	0	0
S1196_0660	Basidiomycota	Tremellomycetes	CCCCGTGTTGAGTCAAATTAAGCCGCAGGCTCCACTCCTGGTGGTGCCCTTCCGTCAATTCCTTTAAGTTTCAGCCTTGCGACCATACTCCCCCCAGAACCCAAAGACTTTGATTTCTCGTAAGGTGCCGAGCGAGTCAAAAAAATAACATCGCCCGATCCCTAGTCGGCATAGTTTACTGTTAAGACTACAACGGTATCTGATCGTTTTCGATCCCCTAACCTTCGTTCTTGATTAATGAAAACATCCTTGGCAAATGCTTTCGCAGTAGTTAGTCTTCAGTAAATCCAAGAATTTCACCTCTAGCCACTGAATACTAATGCCCCCAACTATCCCTATTAATCATTACGGCGATCCTAGAAACCAACAAAATAGAACCGCACG	EU154981	384	1.45759e-161	1	1	384	5	1	76	29	3	53	30	12	0	10	65	14	59	36	24	41	33	193	1	16	74	80	30	141	91	116	0	4
S1196_0661	Ascomycota	Sordariomycetes	CCCCGTGTTGAGTCAAATTAAGCCGCAGGCTCCACTCCTGGTGGTGCCCTTCCGTCAATTTCTTTAAGTTTCAGCCTTGCGACCATACTCCCCCCGGAACGCAGAAACTTGTACTTTCGTCCAAGGTGCCGAACGAGTCATAATAACATCGTCCCATCCCTAGTTCGCATAGTTTATGGTTAAGACTACGACGGTATCTGATCGTCTTCGATCCCCTAACTTTCGTTCCTGATTAATGAAAACATCCTTGGCAAATGCTTTCGCAGTAGTTAGTCTTCAATAAATCCAAGAATTTCACCTCTGACAATTGAATACTGATGCCCCCGACTGTCCCTATTCATCATTACGGCGGTCCTAGAAACCAACAAAATAGAACTGCCCG	DQ470998	357	1.32276e-149	0.96	1	382	30	115	18	36	76	6	102	16	0	37	46	113	25	114	16	14	129	141	205	11	3	147	9	76	15	6	21	5
S1196_0663	Glomeromycota	Glomeromycetes	CCCCGTGTTGAGTCAAATTAAGCCGCAGGCTCCACTCCTGGTGGTGCCCTTCCGTCAATTCCTTTAAGTTTCAGCCTTGCGACCATACTCCCCCCAGAACCCAAAAACTTTGATTTCTCATAAGGTGCCAGACGAGTTAGATTATTCCTCGTCTGATCCCTAGTCGGCATAGTTTATGGTTTGGACTACGACGGTATCTGATCGTCTTCGATCCCCAAACTTTCGTTCTTGATTAATGAAAACATCCTTGGCAAATGCTTTCGCAGAAGTTAGTCTTTCATAAATCCAAGAATTTCACCTCTGACAATTAAATACTAATGCCCCCAACTATCCCTATTAATCATTACTTTGGTCCTAGAAACCAACAAAATAGAACCAAAG	AF229771	351	5.99853e-147	0.96	1	381	0	0	0	0	0	0	0	0	0	0	0	0	0	0	0	0	0	0	0	0	0	0	0	0	0	1	2	0
S1196_0665	Basidiomycota	Agaricomycetes	TCCCGTGTTGAGTCAAATTAAGCCGCAGGCTCCACACCTGGTGGTGCCCTTCCGTCAATTCCTTTAAGTTTCAGCCTTGCGACCATACTCCCCCCAGAACCCAAAGACTTTGATTTCTCGTAAGGTGCCGAACAATACATAATATTTGTAATTGTCCGATCCCTAGTCGGCATAGTTTACTGTTAAGACTACAACGGTATCTGATCGTTTTCGATCCCCTAACCTTCGTTCTTGATTAATGAAAACATCCTTGGCAAATGCTTTCGCAATAGTTGGTCTTGAGTCAATCCAAGAATTTCACCTCTAGCGACTCAATACCAATGCCCCCAACTATCCCTATTAATCATTACGGCGATTCTAGAAACCAACAAAATAGAACCACACG	DQ457622	372	3.02486e-156	0.98	2	385	0	0	0	13	0	0	5	0	0	0	0	0	0	1	0	0	0	0	0	0	0	24	0	0	0	0	0	1
S1196_0667		Fungi_other	TCCCGTGTTGAGTCAAATTAAGCCGCAGGCTCCACTCCTGGTGGTGCCCTTCCGTCAATTCCTTTAAGTTTCAGCCTTGCGACCATACTCCCCCCGGAACCCAAACACTTTGATTTCTCATAAGGTGCCGATGGCGTCATTGTATAACATCCACCGATCCCTAGTCGGCATAGTTTATGGTTAAGACTACGACGGTATCTGATCGTCTTCGATCCCCTAACTTTCGTTCTTGATTAATGAAAACATCCTTGGCAAATGCTTTCGCATTAGTTTGTCTTCTGGAAATCCAAGAATTTCACCTCTGACTCCAGAATACAAATGCCCCCAACTATCCCTATTAATCATTACTTTGGTCCTTTAACCAACAAAATAGAACCAAAG	FJ687268	333	5.64536e-139	0.93	1	381	0	0	0	0	2	3	0	0	0	0	9	1	0	3	0	1	9	15	0	0	0	0	0	21	1	0	0	1
S1196_0668	Cryptomycota	Fungi_other	TCCCGTGTTGAGTCAAATTAAGCCGCAGGCTCCACTCCTGGTGGTGCCCTTCCGTCAATTCCTTTAAGTTTCAGCCTTGCGACCATACTCCCCCCAGAACCCAAAAACTTTGATTTCTCTTACGGTGCCGATGAAGTCGCGAACGACATCCACCAATCCCGAGTCGGCAACGTTTACGGTTGTGACTACGACGGTATCTAATCGTCTTCGATCCCACAACTTTCGTTCTTGATCAATGAAAACATCCTTGGCAAATGCTTTCGCACTAGTTAGTCTTCGGTAAATCCAAGAATTTCACCTCTGACTACCGAATACTAATGCCCCCAACTGTCCCTCTTAATCATTACGATGATCCTCAAACCAACAAAATAAGATCATTG	AF372713	316	1.91001e-131	0.92	1	371	1	0	0	0	0	0	0	0	0	0	11	6	0	13	0	2	6	2	0	0	9	1	0	3	2	0	0	0
S1196_0669	Basidiomycota	Fungi_other	CCCCGTGTTGAGTCATTTTAAGAGCCGCAGGCCTCTCCTGGTGGTGCCCTTCCGTCAATTCTGATAAGTTTCAGCCTTGCGACCATACTCCCCCCAGAACCCAAAGACTTTGATTTCTCGTAAGGTGCTGAACGACCCATTAAATGTGAGGTTCGTCCAATCCCTAGTCGGCATAGTTTACTGTTAAGACTACAACGGTATCTGATCGTTTTTGATCCCCTAACCTTCGTCCTTGATTAATGAAAACATCCTTGGCAAATGCTTTCGCACTAGTTGGTCTTGAGTCAATCCAAGAATTTCACCTCTAGCGACTCAATACCAATGCCCCCAACTATCCCTATTAATCATTACGGTGACTCTAGAAACCAACAAAATAGAACCACACG	AY916697	336	2.68721e-140	0.94	1	386	0	0	0	0	0	0	0	0	1	123	0	0	0	0	0	0	0	0	0	0	0	0	0	0	0	0	0	0
S1196_0672	Basidiomycota	Fungi_other	CCCCGTGTTGAGTCAAATTAAGCCGCAGGCTCCACGCCTGGTGGTGCCCTTCCGTCAATTCCTTTAAGTTTCAGCCTTGCGACCATACTCCCCCCAGAACCCAAAGACTTTGATTTCTCGCAAGGTGCCGAACGACGCATCACGTGGAGGTCGCCCGATCCCTAGTCGGCATAGTTTACTGTGGAGACTACAACGGTATCTAATCGTTTTCGATCCCTCCACCTTCGTTCTTGATCAATGAAAACATCCTTGGCAGATGCTTTCGCAGTAGTCCGTCTTCAGCCAATCCAAGAATTTCACCTCTAGCGGCTGAGTACGAATGCCCCCGACTGTTCCTATTAATCATTACGGCGAATCCCAAAACCAACGAAACGCGGACCGCACG	GU187642	319	9.09212e-133	0.91	1	385	1	9	2	3	16	2	0	1	0	2	0	0	149	45	3	8	0	0	0	2	3	17	8	0	0	4	1	0
S1196_0674	Basidiomycota	Fungi_other	CCCGCAATTTGAGGGTGTCGCCTACTATATGATAGTAGACTAGCATTTAGATTCGGCTTATGTTTCAAAGCCAGGCTAACCACCTCACCCTTTCGGGCTGCTTTTCGGTGCAGAGTTCACTGCGGCTAAACTGTGAAAAGTTTACACCTGGTGGTGCCCTTCCGTCAATTCCTTTAAGTTTCAGCCTTGCGACCATACTCCCCCCAGAACCCAAAGACTTTGATTTCTCGTAAGGTGCCGAACAACACATCAAAATTGAGGTTGTCCGATCCCTAGTCGGCATAGTTTACTGTTAAGACTACAACGGTATCTGATCGTTTTCGATCCCCTAACCTTCGTTCTTGATTAATGAAAACATCCTTGGCAAATGCTTTCGCAATAGTCGGTCTTGAGTCAATC…	DQ457697	409	1.63249e-172	0.93	1	495	0	0	0	0	2	0	0	0	0	0	0	0	0	0	0	0	0	0	0	0	0	0	0	0	0	0	0	0
S1196_0675	Ascomycota	Eurotiomycetes	CCCCGTGTTGAGTCAAATTAAGCCGCAGGCTCCCGAATAATTTTTTAAGGGTTTTCACTATCAGGATTTCTCCTGATACCGGACTATATCTTAAGCTAGCTTTTTTGCCAACCCACACCCGTTTAGTCTCTGAACCTTTCCCATAATTTAGTGTAAATATTAGGGACTTGGCTGCGGATTGCCCATATATCTTTCAACGTTATAACCATACCCGAGGCAATTAACCTGGCCACCACTGTCTTTCGATCAGCGGCTTGGTAGTTGAAAGCTTTAGGGGTTTCCCGCAATTTGAGTGTGTTGCCCGGCCGCTAAGACCAGACTAGCATTTAACTGTTTATAGGACACCACATCACCTTTTCAGGCTGCCTTTCGGCGCAGAGTTCCTGCGGCTATTCAGGA…	AY526482	308	9.82637e-128	0.81	1	536	0	0	0	0	0	2	0	0	0	0	0	0	0	0	0	0	0	0	0	0	0	0	0	0	0	0	0	0
S1196_0676	Chytridiomycota	Chytridiomycetes	CCCCGTGTTGAGTCAAATTAAGCCGCAGGCTCCACTCCTGGTGGTGCCCTTCCGTCAATTCCTTTAAGTTTCAGCCTTGCGACCATACTCCCCCCGGAACCCAAAGACTTTGATTTCTCATAAGGTGCCGATGGCGTCATGGTAAGTGAAGCGCCACCGATCCCTAGTCGGCATAGTTTATGGTTAAGACTACGACGGTATCTGATCATCTTCGATCCCCTAACTTTCGTTCTTGATTAATGAGAACATCCTTGGCAGATGCTTTCGCAGAAGTTCGTCTTTCATAAATCCAAGAATTTCACCTCTGACAATTAAATACGAATGCCCCCAACTATCCCTATTAATCATTACTTCGGTCCTAGAAACCAACAAAATAGAACCAAAG	HQ901748	345	2.76169e-144	0.95	2	385	0	30	11	0	0	0	2	0	0	0	7	2	0	21	0	20	8	0	0	0	1	0	0	5	0	13	0	0
S1196_0677	Chytridiomycota	Chytridiomycetes	CCCCGTGTTGAGTCAAATTAAGCCGCAGGCTCCACTCCTGGTGGTGCCCTTCCGTCAATTCCTTTAAGTTTCAGCCTTGCGACCATACTCCCCCCAGAACCCAAAAACTTTGATTTCTCTTAAGGTACCAAATGAGTCTATACGGACGTCATCTGATCCCTAGTCGGCATAATTTATGGTTAGGACTACGACGGTATCTGATCGTCTTCGATCCCCTAACTTTCGTTCTTGATTAATGAAAACATCCTTGGCAAATGCTTTCGCAGAAGTTAGTCTTTCATAAATCCAAGAATTTCACCTCTGACAATTAAATACTAATGCCCCCAACTATCCCTATTAATCATTACTTCGGTCCCGGAAACCAACAAAATAGAACCAAAG	HQ901748	347	3.54786e-145	0.95	2	381	0	11	0	0	0	0	0	0	0	0	0	0	0	1	0	0	5	0	0	0	0	0	0	0	0	1	4	0
S1196_0680	Blastocladiomycota	Blastocladiomycetes	CCCCGTGTTGAGTCAAATTAAGCCGCAGGCTCCACTCCTGGTGGTGCCCTTCCGTCAATTCCTTTAAGTTTCAGCCTTGCGACCATACTCCCCCCAGAACCCAAAAACTTTGATTTCTCAAAAGGTGCCGGGCGCGTCTTTTTTGTGAAAAACTACATGACGCCCGATCCCTGGTCGGCATCGTTTATGGTTAAGACTACGATGGTATCTAATCATCTTCGATCCCTTAACTTTCGTTCTTGATTAATGAAAACATCCTTGGCAAATGCTTTCGCAGAAGTTAGTCTTTCCTAAATCCAAGAATTTCACCTCTGACAATTAAATACTAATGCCCCCAACTATCCCTATTAATCATTACTCCAGTCCCAGAAACCAACAAAATAGAACCAGAGTCCTATT…	EF014366	408	3.71259e-172	0.99	1	414	0	0	0	0	0	0	0	0	0	0	0	0	18	0	0	0	0	0	0	0	0	0	0	0	0	0	0	0
S1196_0681	Ascomycota	Sordariomycetes	CCCCGTGTTGAGTCAAATTAAGCCGCAGGCTCCACCCCTGGTGGTGCCCTTCCGTCAATTTCTTTAAGTTTCAGCCTTGCGACCATACTCCCCCTGGAACCCAAACACTTGAGATTTCTCGTAAGGTGCCAAACGAGTCAAAAAATAACACCGTCTGATCCCTAGTCGGCATAGTTTATGGTTAAGACTACGACGGTATCTGATCGTCTTCGATCCCCTAACTTTCGTTCCTGATTAATGAAAACATCCTTGGCAAATGCTTTCGCAGTAGTTAGTCTTCAATAAATCTAAGAATTTCACCTCTGACAATTGAATACTGATGCCCCCGACTGTCCCTATTAATCATTACGGCGGTCCTAGAAACCAACAAAATAGAACCGCGCG	AF281176	366	1.37177e-153	0.97	1	384	0	0	0	0	0	0	0	0	0	0	0	0	0	166	0	0	0	0	0	0	0	1	0	0	0	0	0	0
S1196_0682	Basidiomycota	Agaricomycetes	CCCCGTGTTGAGTCAAATTAAGCCGCAGGCTCCACTCCTGGTGGTGCCCTTCTGTCAATTCCTTTAAGTTTCAGCCTTGCGACCATACTCCCCCCAGAACCCAAAGACTTTGATTTCTCGCAAGGTGCCAAACGACGCATAATATTGAGGTTGTCCGATCCCTAGTCAGCATAGTTTACTGTTAAGACTACAATGGTATCTGATCGTTTTCGATCCCCTAACCTTCATTCTTGATTAATAAAAACATCCTTGGCAAATGCTTTCGCAATAGTTTGTCTTGCATAAATCCAAGAATTTCACCCCTAGCAATGCAATACAAATGCCCCCAACTATCCCTATTAATTATTACAGCAACTCTAGAAACCAACAAAATAGAACCGCACG	U59093	352	2.18276e-147	0.95	1	384	0	0	0	0	0	0	0	0	0	0	0	0	0	0	0	0	0	0	0	0	0	12	0	0	0	115	0	0
S1196_0684	Chytridiomycota	Chytridiomycetes	CCCCGTGTTGAGTCAAATTAAGCCGCAGGCTCCACTCCTGGTGGTGCCCTTCCGTCAATTCCTTTAAGTTTCAGCCTTGCGACCATACTCCCCCCGGAACCCAAAAACTTTGATTTCTCATAGAGTGCCGGGCGCGTCAATAATAACTTCGCCCGATCCCCAGTCGGCATAGTTTATGGTTAAGACTACGACGGTATCTGATCGTCTTCGATCCCCTAACTTTCGTTCTTGATTAATGAAAACATCCTTGGCAAATGCTTTCGCAGAAGTTAGTCTTTCATAAATCCAAGAATTTCACCTCTGACAATTAAATACTAATGCCCCCAACTGTCCCTATTAATCATTACCCTGGCTCTGCAAACCAACAAAATAGAACCAAGG	AY987439	344	7.56672e-144	0.95	1	379	0	0	0	0	0	0	0	0	0	0	0	0	0	0	0	0	2	0	0	0	0	0	0	0	0	0	0	0
S1196_0685	Ascomycota	Lecanoromycetes	CCCCGTGTTGAGTCAAATTAAGCCGCAGGCTCCACGCCTGGTGGTGCCTTTCCGTCAATTTCTTTAAGTTTCAGCCTTGCGACCATACTCCCCCCAGAACCCAAAGACTTTGATTTCTCGTAAGGTGCGCACCGGGTCAAAATAATAACACCGGCACATCCCTAGTCGGCATAGTTTATGGTTAAGACTACGACGGTATCTGATCGTCTTCGATCCCCTAACTTTCGTTCACTGATTAATGAAAACATCCTTGGCAAATGCTTTCGCAGTAGTTAGTCTTCAATAAATCCAAGAATTTCACCTCTGACAATTGAATACTGATGCCCCCGACTATCCCTATTAATCATTACGGCGGTCCTAGAAACCAACAAAATAGAACCGCACGTCCTATTCCATTAT…	AF491848	391	1.23904e-164	0.98	1	408	0	0	0	0	0	0	0	0	0	0	0	0	0	0	0	0	0	0	0	0	0	0	0	0	0	0	0	0
S1196_0686	Kickxellomycota	Kickxellomycetes	TCCCGTGTTGAGTCGAATTGAGCCGCAGGCTCCACTCCTGGTGGTGCCCTTCCGTCAATTCCTTTAAGTTTCAGCCTTGCGACCATACTCCCCCCGGAACCCAAAAACTTTGATTTCTCATACGGTGCCAAACAAGTCATATATTATAACATTGTCTGATCCCGAGTCGGCATAGTTTATGGTTAAGACTACGACGGTATCTAATCGTCTTCGATCCCCTAACTTTCGTTCTTGATTAATGAAAACATCCTTGACAGACGCTTTTGCATCAGTTTGTCTGGCACTGGTTCAAGTATTTCACCACTGACAGTGCCATACAAATGTCCCCAACTGTCCCTATTAATCATTACCTTAGTTTTAGAAACCAACAAAATAAAACCAAAGTCCTATTTTATTATT…	JN940691	389	9.47541e-164	0.98	1	406	0	0	0	0	5	0	0	0	0	0	0	29	0	0	0	1	90	0	0	0	0	0	0	0	0	0	0	0
S1196_0687	Zoopagomycota	Zoopagomycetes	CCCCGTGTTGAGTCAAATTAAGCCGCAGGCTCCACTCCTGGTGGTGCCCTTCCGTCAATTCCTTTAAGTTTCAGCCTTGCGACCATACTCCCCCCGGAGCCTAAAAACTTTGATTTCTCATAAGGTGCCGAGCGGGTCATCAAAAGGTAACACCGCCCGATCCCTAGTCGGCATAGTTTATGGTAGAGACTACGACGGTATCTAATCGTCTTCGATCCCCCTACTTTCGTTCTTGATTAATGAAAACATCCTTGGCAAATGCTTTCGCAATAGTTTGTCTTTAATAGATCCAAGAATTTCACCTCTGACAATTAAATACAAATGCCCCCAACTGTCCCTATTAATCATTACCGTGGTTCCTAAAAACCAACAAAATAGAACCAAGG	DQ643781	353	7.91835e-148	0.95	1	386	84	1	0	0	2	0	10	0	0	0	0	1	0	0	0	0	0	0	0	0	0	0	0	0	0	0	1	0
S1196_0692	Glomeromycota	Glomeromycetes	TCCCGTGTTGAGTCAAATTAAGCCGCAGGCTCCACCCCTGGTGGTGCCCTTCCGTCAATTCCTTTAAGTTTCAGCCTTGCGACCATACTCCCCCCGGAACCCAAACACTTTGGTTTCCCATGAGGTGCCGAGCGCGTCATTTTGTCAACATCGCCCGATTCCTAGTCGGCATAGTTTATGGTTAAGACTACGACGGTATCTGATCGTCTTCGATCCCCTAACTTTCGTTCTTGATTAATGAAAACATCCTTGGCAAATGCTTTCGCAGTAGTTAGTCTTCAATAAATCCAAGAATTTCACCTCTGACAATTGAATACTAATGCCCCCAACTATCCCTATTAATCATTACAACGGTCCTAGAAACCAACAAATAGAACCATTG	EF033120	338	3.45229e-141	0.94	1	380	0	0	3	22	32	14	0	0	0	0	0	42	21	0	0	0	0	0	0	0	2	21	0	0	0	0	0	7
S1196_0693	Basidiomycota	Agaricomycetes	CCCCGTGTTGAGTCAAATTAAGCCGCAGGCTCCACACCTGGTGGTGCCCTTCCGTCAATTCCTTTAAGTTTCAGCCTTGCGACCATACTCCCCCCAGAACCCAAAGACTTTGATTTCTCGTAAGGTGCCGAGTGATACATCAAATTTGAGGTCACCCGATCCCTAGTCGGCATAGTTTACTGTTAAGACTACAACGGTATCTGATCGTTTTCGATCCCCTAACCTTCGTTCTTGATTAATGAAAACATCCTTGGCAAATGCTTTCGCAATAGTTGGTCTTGAGTCAATCCAAGAATTTCACCTCTAGCGACTCAATACCAATGCCCCCAACTATCCCTATTAATCATTACGGCGATTCTAGAAACCAACAAAATAGAACCACACG	DQ851575	378	6.65002e-159	0.99	2	385	474	731	11	112	155	152	39	28	3	196	153	141	26	365	9	24	427	0	65	9	184	90	36	24	20	31	98	35
S1196_0695	Ascomycota	Sordariomycetes	CCCCGTGTTGAGTCAAATTAAGCCGCAGGCTCCACCCCTGGTGGTGCCCTTCCGTCAATTTCTTTAAGTTTCAGCCTTGCGACCATACTCCCCCCAGAACCCAAAGACTTTGATTTCTCGTAAGGTGCCGAACGGGTCAATAAGTAACACCGTCCGATCCCTAGTCGGCATAGTTTATGGTTAAGACTACGACGGTATCTGATCGTCTTCGATCCCCTAACTTTCGTTCCTGATTAATGAAAACATCCTTGGCAAATGCTTTCGCAGTAGTTAGTCTTCAATAAATCCAAGAATTTCACCTCTGACAATTGAATAC	EU215404	310	7.02827e-129	0.99	1	316	192	213	46	158	184	38	632	222	0	60	63	1068	190	116	402	22	21	3	4	837	15	57	389	202	296	34	62	30
S1196_0697	Basidiomycota	Tremellomycetes	CCCCGTGTTGAGTCAAATTAAGCCGCAGGCTCCACACCTGGTGGTGCCCTTCCGTCAATTCCTTTAAGTTTCAGCCTTGCGACCATACTCCCCCCAGAACCCAAAGACTTTGATTTCTCGTAAGGTGCCGAGCCAGTCAAAAATAAACGTGGCCCGATCCCTAGTCGGCATAGTTTACTGTTAAGACTACAACGGTATCTAATCGTTTTTGATCCCCTAACCTTCGTTCTTGATCAATGAAAACGTCCTTGGCAAATGCTTTCGCAGATGTTAGTCTTCCGTAAATCTAAGAATTTCACCTCCAGCAACGGAATACTAATGCCCCCGACCGTCCCTATTAATCATTACGGCGATCCTAGAAACCAACAAAATAGAACCGCACG	AF261665	375	1.40977e-157	0.98	1	383	53	316	15	39	69	32	212	2	0	32	233	35	39	39	77	36	493	465	12	32	20	26	32	54	34	29	72	14
S1196_0698	Monoblepharidomycota	Monoblepharidomycetes	CCCCGTGTTGAGTCAAATTAAGCCGCAGGCTCCACTCCTGGTGGTGCCCTTCCGTCAATTCCTTTAAGTTTCAGCCTTGCGACCATACTCCCCCCAGAACCCAAAAGCTTTGATTTCTCACACCGTGCCGACCGGGTCATAAAGTAACACCGGCCGATCCGGAGCTGGCATAGTTTATGGTTAAGACTACGACGGTATCTGATCGTCTTCGATCCCCTAACTTTCGTTCTTGATCAATGAAAACATCCTTGGCAAATGCTTTCGCAGAAGTTAGTCTTTCATAAATCCAAGAAATTCACCTCTGACAATTAAATACTAATGCCCCCAACTATCCCTATTAATCATTACTCCGGTTCCGGAAACCAACAAAATAGAACCAAAG	AY546682	367	4.91674e-154	0.98	1	379	0	0	0	0	47	0	7	0	0	0	0	8	0	0	0	0	0	0	0	4	0	0	0	7	0	0	0	0
S1196_0700	Ascomycota	Sordariomycetes	CCCCGTGTTGAGTCAAATTAAGCCGCAGGCTCCACTCCTGGTGGTGCCCTTCCGTCAATTTCTTTAAGTTTCAGCCTTGCGACCTGCTGAACGTTAGCCTCTGAAAGCGAAGTTCAGGCGGTGACCACTTACCATACTCCCCCCGGAACGCAGAAACTTGTACTTTCGTGTAAGGTGCCGAACGAGTCAAAAAATAACATCGTCCGATCCCTAGTTCGCATAGTTTATGGTTAAGACTACGACGGTATCTGATCGTCTTCGATCCCCTAACTTTCGTTCCTGATTAATGAAAACATCCTTGGCAAATGCTTTCGCAGTAGTTAGTCTTCAATAAATCCAAGAATTTCACCTCTGACAATTGAATACTGATGCCCCCGACTGTCCCTATTAATCATTACG…	DQ470998	311	3.81562e-129	0.98	131	453	0	0	0	0	0	0	0	0	0	0	0	0	0	0	0	0	0	0	37	0	0	0	0	0	0	0	0	0
S1196_0701	Basidiomycota	Tremellomycetes	CCCCGTGTTGAGTCAAATTAAGCCGCAGGCTCCACACCTGGTGGTGCCCTTCCGTCAATTCCTTTAAGTTTCAGCCTTGCGACCATACTCCCCCCAGAACCCAAAGACTTTGATTTCTCGTAAGGTGCCGATTCCTTCATACTTGAATGGAACCGATCCCTAGTCGGCATAGTTTACTGTTAAGACTACAACGGTATCTAATCGTTTTTGATCCCCTAACCTTCGTTCTTGATCAATGAAAACGTCCTTGGCAAATGCTTTCGCAGTAGTTAGTCTTCCGTAAATCTAAGAATTTCACCTCTAGCAACGGAATACTAATGCCCCCGACCGTCCCTATTAATCATTACGGCGATCCTAGAAACCAACAAAATAGAACCGCACG	JN938719	378	6.59011e-159	0.99	1	382	0	0	0	0	0	1	4	0	0	0	2	22	4	3	0	0	4	0	0	0	0	6	0	0	1	1	3	0
S1196_0704	Ascomycota	Fungi_other	CCCCGTGTTGAGTCAAATTAAGCCGCAGGCTCCACTCCTGGTGGTGCCCTTCCGTCAATTCCTTTAAGTTTCAGCCTTGCGACCATACTCCCCCCAGAACCCAAAGACTTTGATTTCTCATAAGGTGCCGGGCGGGTCAAGAAACGAACACCGCCCGATCCCTAGTCGGCATAGTTTATGGTTAAGACTACGACGGTATCTAATCGTCTTCGATCCCCTAACTTTCGTTCTTGATTAATGAAAACATCCTTGGCAAATGCTTTCGCAGTAGTTAGTCTTCAGGAAATCCAAGAATTTCACCTCTGACACCTGAATACTAATGCCCCCAACTGTCCCTATTAATCATTACGGCGATCCCTCAAACCAACGAAAAAGGACCGCACGTCCTATTCTATTATT…	AY548293	363	3.12833e-152	0.94	1	407	15	2	0	0	4	1	3	0	0	2	0	0	1	8	2	3	0	1	0	2	0	0	0	4	23	1	0	0
S1196_0705	Chytridiomycota	Chytridiomycetes	CCCCGTGTTGAGTCAAATTAAGCCGCAGGCTCCACGCCTGGTGGTGCCCTTCCGTCAATTCCTTTAAGTTTCAGCCTTGCGACCATACTCCCCCCGGTACCCAAAGACTTTGATTTCTCATAAGGTGCCAAACAGCATATTATTTACTGTCTGATCCCTAGTCGGCATAGTTTATGGTCAAGACTACGACGGTATCTGATCGTCTTCGATCCCCTGACTTTCGTTCTTGATTAATGAAAACATCCTTGGCAAATGCTTTCGCAGAAGTTAGTCTTTATTAAATCCAAGAATTTCACCTCTGACTTCTCAATAGTAACGCCCCCAACTATCCCTATTAATCATTACTTCGGTTTCGAAAACCAACAAAATAAAACCAAAGTCCTATTTTATTATTCCATG…	DQ536492	345	2.90268e-144	0.93	1	402	0	0	0	0	0	0	0	0	0	0	0	0	0	0	0	0	5	0	0	0	0	0	0	0	0	0	0	0
S1196_0706	Basidiomycota	Microbotryomycetes	CCCCGTGTTGAGTCAAATTAAGCCGCAGGCTCCACACCTGGTGGTGCCCTTCCGTCAATTCCTTTAAGTTTCAGCCTTGCGACCATACTCCCCCCCGAACCTCATTTAAAGATTTCTCTTCGGGTGCTGATACAGTCATTAAAAATCCTGTACCAATCCCCAATTGGCATAGTTTACAGAAGAGACTACAACGGTATCTAATCGTTTTCGATCCCCCTTCCTTCGTTCTTGATCAATGAAAACATCCTTGGCAAATGCTTTCGCAGTAGTTTGTCTTCCGGCAATCCAAGAATTTCACCTCTGACGACGGAATACAAATGCCCCCAACTATCCCTATTAATCATTACGGCGATCTCAGAAACCAACAAAATGGGAACGCGCG	DQ832199	378	6.59011e-159	0.99	1	382	39	120	42	0	1	0	113	12	0	2	9	3	21	15	19	1	38	0	8	4	14	4	18	5	0	0	18	5
S1196_0709	Chytridiomycota	Chytridiomycetes	CCCCGTGTTGAGTCAAATTAAGCCGCAGGCTCCACACCTGGTGGTGCCCTTCCGTCAATTCCTTTAAGTTTCAGCCTTGCGACCATACTCCCCCCGGTACCCAAAGACTTTGATTTCTCATAAGGTGCCGAACGTGTCATTTCATACAACGTCCGATCCCTAGTCGGCATAGTTTATGGTCGGGACTACGACGGTATCTGATCATCTTCGATCCCCCGACTTTCGTTCTTGATTAATGAAAACATCCTTGGCAAATGCTTTCGCAGAAGTTAGTCTTTTGAAAATCCAAGAATTTCACCTCTGACATCAAAATACTAATGCCCCCAACTATCCCTATTAATCATTACTTCGGTCCTAGAAACCAACAAAATAGAACCAAAG	DQ536486	348	1.27934e-145	0.95	1	381	2	0	5	0	0	0	0	0	0	0	6	3	0	0	1	3	43	11	2	0	0	0	2	0	0	0	0	0
S1196_0710	Basidiomycota	Agaricomycetes	CCCCGTGTTGAGTCAAATTAAGCCGCAGGCTCCACTCCTGGTGGTGCCCTTCCGTCAATTCCTTTAAGTTTCAGCCTTGCGACCATACTCCCCCCAGAACCCAAAGACTTTGATTTCTCGTAAGGTGCCGAGCAACACATGAACGTGAGTTTGCCCGATCCCTAGTCGGCATCGTTTACTGTTAAGACTACAACGGTATCTGATCGTTTTCGATCCCCTAACCTTCGTTCTTGATTAATGAAAACATCCTTGGCAAATGCTTTCGCAGAAGTTAGTCTTCGGTCAATCCAAGAATTTCACCTCTAGCGACCGAATACTAATGCCCCCAACTGTCCCTATTAATCATTACGGCGACTCTAGAAACCAACGAAATAGAACCGCACG	DQ898739	364	1.05498e-152	0.97	1	384	0	0	11	5	18	7	1	0	0	1	1	28	111	10	3	16	2	0	0	1	4	40	0	11	2	11	1	1
S1196_0711	Ascomycota	Fungi_other	CCCCGTGTTGAGTCAAATTAAGCCGCAGGCTCCACTCCTGGTGGTGCCCTTCCGTCAATTTCTTTAAGTTTCAGCCTTGCGACCATACTCCCCCAGGAGCCCAAACATTTTGATTTATCGAAAGGTGCCGGGCGGGCCAAAGAATAGCGCCGCCCGATCCCTAATCGGCATGGTTTATGGTTAAGACTACAACGGTATCTGATCGTTTTCGATCCCCTAACTTTCGTTCCTGATTAATGAAAACATCCTTGGCGAATGCTTTCGCAGTAGGTAGTCTTCAACCGGTCCAAGAATTTCACCTCTGACGGTTGAATACTGACGCCCCCGACTGTCCCTATTAATCATTACGGCGGTCCTAAGAACCAACAAAATAGAACCACGCG	AY545725	337	9.6029e-141	0.93	1	383	0	6	6	1	0	0	0	0	0	1	10	0	1	10	0	26	2	0	20	0	2	1	2	8	10	5	4	0
S1196_0713	Chytridiomycota	Chytridiomycetes	CCCCGTGTTGAGTCAAATTAAGCCGCAGGCTCCACTCCTGGTGGTGCCCTTCCGTCAATTCCTTTAAGTTTCAGCCTTGCGACCATACTCCCCCCAGAACCCAAAGACTTTGATTTCTCATAAGGTGCCGAACGAGTCATAAAAGAAAAACTGCGTCCGATCCCTAGTCGGCATAGTTTATGGTTAAGACTACGATGGTATCTAATCATCTTCGATCCCTTAACTTTCGTTCTTGATTAATGAAAACATCCTTGGCAAATGCTTTCGCAGAAGTTAGTCTTTCATAAATCCAAGAATTTCACCTCTGACAATTAAATACTAATGCCCCCAACTATCCCTATTAACCATTACTTCGGTCCTAGAAACCAACAAAATAGAACCAAAG	DQ643792	355	1.02653e-148	0.96	1	385	0	0	0	0	0	0	0	0	0	0	0	27	0	0	0	0	0	0	0	0	0	0	0	0	0	0	0	0
S1196_0717	Ascomycota	Eurotiomycetes	CCCCGTGTTGAGTCTACTGCGGCTAGCGGTAAAGGTTTACGCCTTGTGGTGCCCTTCCGTCAATTTCTTTAAGTTTCAGCCTTGCGACCATACTCCCCCCAGAACCCAAAAACTTTGATTTCTCGTAAGGTGCCGAACGGGTCATCATAGAATCCCGTCCGATCCCTAGTCGGCATAGTTTATGGTTAAGACTACGACGGTATCTGATCGTCTTCGATCCCCTAACTTTCGTTCCCTGATTAATGAAAACATCCTTGGCGAATGCTTTCGCAGTAGTTAGTCTTCAGCAAATCCAAGAATTTCACCTCTAACAGCTGAATACTGACGCCCCCGACTATCCCTATTAATCATTACGGCGGTCCTAGAAACCAACAAAATAGAACCGCACG	AY526485	355	1.03886e-148	0.97	10	389	0	0	1	0	0	2	0	0	0	0	0	0	0	0	5	0	0	0	0	13	0	0	0	0	0	2	0	1
S1196_0718	Ascomycota	Eurotiomycetes	TCCCGTGTTGAGTCAAATTAAGCCGCAGGCTCCACGCCTTGTGGTGCCCTTCCGTCAATTTCTTTAAGTTTCAGCCTTGCGACCATACTCCCCCCAGAACCCATACACTTTGATTTCTCGTAAGGTGCCGAACGGGTCATATAAAAAACACCGTCCGATCCCTAGTCGGCATAGTTTATGGTTAAGACTACGACGGTATCTGATCGTCTTCGATCCCCTAACTTTCGTTCACTGATTAATGAAAACATCCTTGGCGAATGCTTTCGCAATAGTTAGTCTTCAATAAATCCAAGAATTTCACCTCTGACAATTGAATACTGACGCCCCCGACTATCCCTATTAATCATTACAGCGGTCCTAGAAACCAACAAAATAGAACCGATG	FJ358326	382	1.12097e-160	0.99	1	384	1	532	76	176	649	1181	82	5	0	30	20	839	45	457	80	49	297	39	212	15	210	83	18	124	19	61	130	38
S1196_0721	Ascomycota	Pezizomycetes	TCCCGTGTTGAGTCAAATTAAGCCGCAGGCTCCACTCCTGGTGGTGCCCTTCCGTCAATTCCTTTAAGTTTCAGCCTTGCGACCATACTCCCCCCAGAACCCAAAGACTTTGATTTCTCGTAAGGTGCCGAGCGAGTCAGTATAACAACATCGCCCGATCCCTAGTCGGCATAGTTTATGGTTAAGACTACGACGGTATCTGATCGTCTTCGATCCCCTAACTTTCGTTCACTGATTAATGAAAACATCCTTGGCAAATGCTTTCGCAGTAGTTAGTCTTCAATAAATCCAAGAATTTCACCTCTGACAATTGAATACTGATGCCCCCGACTATCCCTATTAATCATTACGGCCGGCCGTCAATACCAACAAAATAAGCCGAAACG	AF046216	385	5.28765e-162	1	2	386	5	8	2	1	3	42	1	2	0	4	3	5	4	5	21	27	7	0	0	45	92	5	1	7	2	11	0	0
S1196_0723	Basidiomycota	Atractiellomycetes	CCCCGTGTTGAGTCAAATTAAGCCGCAGGCTCCACACCTGGTGGTGCCCTTCCGTCAATTCTTTTAAGTTTCAGCCTTGCGACCATACTCCCCCCCGAACCTAGACTTAAAGATTTCTCTTCAGGTGCCGAACGAGTCATTAAAAATCCTCGTCCGATCCCTAGTCGGCATAGTTTACTGTTAAGACTACAACGGTATCTGATCGTTTTCGATCCCCTAACCTTCGTTCTTGATCAATGAAAACATCCTTGGCAAATGCTTTCGCAGTAGTTCGTCTTCAATAAATCCAAGAATTTCACCTCTAGCAATTGAATACGAATGCCCCCAACTATCCCTATTAATCATTACGGCGATCCTAGAAACCAACAAAATAGAAACGCACG	U78043	383	4.03e-161	1	1	383	3	5	0	0	0	0	0	0	0	0	0	25	5	3	0	0	77	20	51	1	9	7	8	0	0	0	0	0
S1196_0724	Ascomycota	Eurotiomycetes	TCCCGTGTTGAGTCAAATTAAGCCGCAGGCTCCCGAGTTTAACTAGGGTTTACCAAGATTTCTCTTGATATCGGACTATATCTTAAGCTAACAGCCTTTGGAGCTGCTAACCCACACCCGTCTAGTCTCTGAACCTTTCCCATAATCCAATTATTCAAGATCTTAGGGACTTGGCTGCGGATTGCCCATATATCATTTCAACGTTGTAACCATACCCGAGGCATTTAACCTGGCCACCACTGTCTTTCGAATCGGCGGCTTGGTAGTTGAAAGCTTTAGGGGTTTCCCGCAATTTGAGCGTGTTGCCCGACCGCTGAGGCCAGACTAGCATTTAACTGTTTATAGGACACCACATCACCCTTTCGGGCTGCTTTTCGGCGCAGAGTTTGCGGCTAAAGT…	JX646822	281	9.34294e-116	0.77	2	556	0	0	0	0	0	21	0	0	0	0	0	0	0	0	0	0	0	0	0	0	0	0	0	0	0	0	0	0
S1196_0725	Entomophthoromycota	Entomophthoromycetes	TCCCGTGTTGAGTCAAATTAAGCCGCAGGCTCCACTCCTGGTGGTGCCCTTCCGTCAATTCCTTTAAGTTTCAGCCTTGCGACCATACTCCCCCCAGAACCCAAAAACTTTGATTTCTCATAAGGTGCCAAACCGAATTGCATCGATCTGATCCCTAGTCGGCATAGTTTATGGTTGAGACTACGACGGTATCTAATCATCTTCGATCCCCCAACTTTCGTCCTTGATCAATGGGAATGTCCTTGGCAAATGCTTTCGCAGAAGTTAGTCTTTCATAAATCCAAGAATTTCACCTCTGACAATTAAATACTAATGCCCCCAACCATCCCTATTCATCATTACTCTGGTTCTATAAACCAACAAAATAAAACCTGAG	JQ014015	337	9.39981e-141	0.95	1	372	0	0	9	14	0	1	0	0	0	0	0	0	0	0	0	0	0	0	0	0	0	0	0	0	0	0	0	2
S1196_0726	Basidiomycota	Agaricomycetes	CCCCGTGTTGAGTCAAATTAAGCCGCAGGCTCCACCCCTGGTGGTGCCCTTCCGTCAATTCCTTTAAGTTTCAGCCTTGCGACCATACTCCCCCCAGAACCCAAAGACTTTGATTTCTCGTAAGGTGCTGAGTGACACATAATATGTAAATCACCCAATCCCTAGTCGGCATAGTTTACTGTTAAGACTACAACGGTATCTGATCGTTTTCGATCCCCTAACCTTCGTTCTTGATTAATGAAAACATCCTTGGCAAATGCTTTCGCAGTAGTTAGTCTTCGATAAATCCAAGAATTTCACCTCTAGCAATCGAATACTAATGCCCCCAACTGTCCCTATTAATCATTACGGTAGCTCTAGAAACCAACAAAATAGAACCACACG	DQ435797	350	1.67868e-146	0.95	1	384	0	0	0	2	0	0	0	0	0	0	0	0	1	1	0	0	0	0	0	0	0	0	0	0	0	0	0	0
S1196_0728	Ascomycota	Fungi_other	CCCCGTGTTGAGTCAAATTAAGCCGCAGGCTCCACCCCTGGTGGTGCCCTTCCGTCAATTTCTTTAAGTTTCAGCCTTGCGACCTGCGAGCGCATACGTTAGCATATTTATTCAGAACGTTCGTGATGTCAAGGCGATGAGACTCACCATACTCCCCCTGGAACCCAAACACTTGAGATTTCTCGTAAGGTGCCAAACGAGTCAAAAAATAACACCGCCCGATCCCTAGTCGGCATAGTTTATGGTTAAGACTACGACGGTATCTAATCGTCTTCGATCCCCTAACTTTCGTTCTTGATTAATGAAAACATCCTTGGCAAATGCTTTCGCAGTAGTTAGTCTTCAATAAATCCAAGAATTTCACCTCTGACAATTGAATACTAATGCCCCCAACTATCC…	AY360756	289	2.21416e-119	0.94	146	470	0	0	0	0	0	0	0	0	0	0	0	0	0	14	0	0	0	0	0	0	0	0	0	0	0	0	0	0
S1196_0729	Basidiomycota	Fungi_other	TCCCGTGTTGAGTCAAATTAAGCCGCAGGCTCCACTCCTGGTGGTGCCCTTCCGTCAATTCCTTTAAGTTTCAGCCTTGTGACCGTACTCCCCCGCGAATTTTACTCAAGATTTCTCTTTAGGTGCCGATTGGGTCATTAAAAATAACCCCAACCGATCCCTAGTCAACATAGTTTACTGTCGAGACTACAACGGTATCTGATCGTTTTCGATCCCCCGACCTTCGTTCTTGATCAATGAAAGCGTCCTTGGCAAATGCTTTCGCAGTAGTTCGTCTTCCAGAAATCCAAGAATTTCACCTCTAGCACTGGAATACGAATGCCCCCAACCGCCCCTATTCATCATTACGGCGATCTCTAAAGACCAACACAATAGGATCGCACG	JQ627503	327	2.59129e-136	0.92	2	384	0	0	0	0	0	0	0	0	0	0	0	0	0	1	3	0	3	0	0	3	0	0	0	11	2	0	0	0
S1196_0731	Basidiomycota	Fungi_other	CCCCGTGTTGAGTCAAATTAAGCCGCAGGCTCCACTCCTGGTGGTGCCCTTCCGTCAATTCCTTTAAGTTTCAGTCTTGCAACCATACTCCCCCCAGAGCCCAAAGACTTTGATTTCTCTAAGGTACCGATCGCCCCGTGTCATCTGAGGCGACCGACCCCTAGTCGGCATCGTTTACTGTTGGGACTACAACGGTATCTAATCGTCTTCGATCCCCCAACCTTCGTTCTTGATCAATGAAAACGTCCTTGGCGGATGTTTTCGCAGTAGATAGTCTTCGATCGATCCAAGGATTTCACCCCTAACGATCGAATACTAACGCCCCCGATCGTCCCTATTTATCATTACGGCGACTCCGAAACCAACGAAAAGGAACCGCGG	DQ534675	286	3.73052e-118	0.88	1	379	0	0	0	2	0	0	0	0	0	0	3	0	0	0	0	0	12	0	0	1	0	5	0	0	0	0	0	0
S1196_0732		Fungi_other	CCCCGTGTTGAGTCAAATTAAGCCGCAGGCTCCCCTTTTGTTAACTTGGGTAAACCAAAAAATCTTGCAAGCTTTCACTTGAAGGCGGACTATACCTTAAGCCTCTGATGAAACGTGAGAGACCGACCCCCATCTAGTCTCTGAACCTGTCCCGTAGGATCTTGCCAGAATGACAAAAATCCCTTAGGGCCTTGGCTGCGGATTGTCCATTGTAGCATCTTCAGTTCTGTTACCATACCCGAGGCTATTAAC	KJ137258	209	2.93641e-84	0.93	1	252	0	0	0	0	0	0	0	0	0	0	0	0	0	0	2	0	0	0	0	0	0	2	0	4	0	2	0	0
S1196_0733	Glomeromycota	Glomeromycetes	CCCCGTGTTGAGTCAAATTAAGCCGCAGGCTCCACTCCTGGTGGTGCCCTTCCGTCAATTCCTTTAAGTTTCAGCCTTGCGACCATACTCCCCCCAGAACCCAAAAACTTTGATTTCTCATAAGGTGCCGAATGAGTCGATAAAAAACTGCATCCGATCCCTAGTTGGCATAGTTTATGGTTAAGACTACGACGGTATCTAATCGTCTTCGATCCCCTAACTTTCGTTCTTGATTAATGAAAACATCCTTGGCAAATGCTTTCGCAGTAGTTAGTCTTCAATAAATCCAAGAATTTCACCTCTGACAATTGAATACTAATGCCCCCAACTATCCCTATTAATCATTACATTCATCCTAGAAACCAACAAAATAGGATGAGCGTCCTATTTTATTATTCC…	EU169391	360	6.61559e-151	0.94	1	404	0	0	0	0	0	0	0	0	0	3	3	0	0	67	0	0	1	0	0	0	0	0	0	0	0	0	0	0
S1196_0736	Blastocladiomycota	Blastocladiomycetes	CCCCGTGTTGAGTCAAATTAAGCCGCAGGCTCCACTCCTGGTGGTGCCCTTCCGTCAATTCCTTTAAGTTTCAGCCTTGCGACCATACTCCCCCCAGAACCCAAAAACTTTGATTTCTCAAAAGGTGCCGGGCGTGTCTGTAAAAAGCTACAGGCGCCCGATCCCTGGTCGGCATCGTTTATGGTTAAGACTACGATGGTATCTAATCATCTTCGATCCCTTAACTTTCGTTCTTGATTAATGAAAACATCCTTGGCAAATGCTTTCGCAGAAGTTAGTCTTTCCTAAATCCAAGAATTTCACCTCTGACAATTAAATACTAATGCCCCCAACTATCCCTATTAATCATTACTCTGGTCCTAGAAACCAACAAAATAGAACCCGAG	U23936	365	3.8271e-153	0.97	1	382	344	0	0	0	0	0	0	0	0	0	0	0	0	0	0	0	0	0	0	0	0	0	0	0	0	0	0	0
S1196_0737	Ascomycota	Dothideomycetes	CCCCGTGTTGAGTCAAATTAAGCCGCAGGCTCCACTCCTGGTGGTGCCCTTCCGTCAATTTCTTTAAGTTTCAGCCTTGCGACCATACTCCCCCTGGAGCCCAAACACTTTGATTTCTCGTAAGGTGCCAAACGCGTCAACAAAATAACATCGTCTGATCCCTAGTCGGCTGTAGAAAGAAGTTAGCAACGGCCAAAGCCACATATAAGAGGAATGCTTATAACTTACCATAGTTTATGGTTAAGACTACGACGGTATCTGATCGTCTTCGATCCCCTAACTTTCGTTCACTGATTAATGAAAACATCCTTGGCAAATGCTTTCGCAGTAGTTAGTCTTCAATAAATCCAAGAATTTCACCTCTGACAATTGAATACTGATGCCCCCGACTATCCCTAT…	GU561841	285	1.22792e-117	0.85	2	434	0	0	0	0	0	0	0	0	0	0	1	0	0	0	0	2	0	0	0	0	0	0	0	0	0	0	0	0
S1196_0738	Ascomycota	Pezizomycetes	CCCCGTGTTGAGTCAAATTAAGCCGCAGGCTCCACTCCTGGTGGTGCCCTTCCGTCAATTCCTTTAAGTTTCAGCCTTGCGACCATACTCCCCCCAGAACCCAAAGACTTTGATTTCTCGTAAGGTTCCGAGCGGGCCAAAATGTAAGCACCGCCCGATCCCTAGTCGGCATAGTTTATGGTTGAGACTACGACGGTATCTGATCGTCTTCGATCCCTCAACTTTCGTTCCTGATTAATGAAAACATCCTTGGCAAATGCTTTCGCAGTAGTTCGTCTTCAACAAATCCAAGAATTTCACCTCTGACAGTTGAATACGGATGCCCCCGACTATCCCTATTAATCATTACGGTGGTCCTAGAAACCAACAAAATAGAACCACACG	FJ176805	376	5.09892e-158	0.99	1	382	0	0	0	0	3	0	0	0	0	0	0	0	0	0	0	21	0	0	0	0	0	4	0	0	0	0	0	0
S1196_0739	Basidiomycota	Pucciniomycetes	CCCCGTGTTGAGTCAAATTAAGCCGCAAGCTCCACGCCTGGTGGTGATCTTCCGTCAATTCCTTTAAGTTTCAGCCTTGCGACCATACTCCCCCCCGAACCTAGACTTAAAGATTTCTCTTCGGGTGCGGATGAAGTCATTAAAGAAGCTCCACCCATCCCCAGTCGGCATAGTTTACTGTTAAGACTACAACGGTATCTGATCGTTTTCGATCCCCTAACCTTCGTTCTTGATCAATGAAAACATCCTTGGCAAATGCTTTCGCAGTAGTTCGTCTTCAATAAATCCAAGAATTTCACCTCTAGCAATTGAATACGAATGCCCCCGACTATCCCTATTAATCATTACGGCGATCCTAGAAACCAACAAAATAGAAACGCTCG	AY124480	363	2.91684e-152	0.99	1	365	0	0	4	0	0	0	0	0	0	0	1	0	0	0	7	2	7	0	175	0	0	0	0	0	0	0	0	0
S1196_0741	Basidiomycota	Agaricomycetes	CCCCGTGCAGAGTCACTGCGGCAAAACAAGTGAACGTTTACACCTGGTGGTGCCCTTCCGTCAATTCCTTTAAGTTTCAGCCTTGCGACCATACTCCCCCCAGAACCCAAAGACTTTGATTTCTCGTAAGGTGCCGAGCAACACATCAAATTTGAGGTTGCCCGATCCCTAGTCGGCATAGTTTACTGTTAAGACTACAACGGTATCTGATCGTTTTCGATCCCCTAACCTTCGTTCTTGATTAATGAAAACATCCTTGGCAAATGCTTTCGCAGTAGTCGGTCTTGAGTCAATCCAAGAATTTCACCTCTAGCGACTCAATACCAATGCCCCCAACTATCCCTATTAATCATTACGGTGACTCTAGAAACCAACAAAATAGAACCACACG	DQ457696	369	6.56753e-155	0.97	5	391	0	0	0	2	0	0	0	0	0	0	0	3	0	5	0	0	1	0	0	0	0	0	0	0	0	2	0	0
S1196_0743	Ascomycota	Fungi_other	CCCCGTGTTGAGTCAAATTAAGCCGCAGGCTCCACCCCTGGTGGTGCCCTTCCGTCAATTTCTTTAAGTTTCATCCTTGCAGACATACTCCCCCTGGAACCCAAACACTTATGATTTCTCGCAATTCGCCTCGGAGGTCAATAAATAACACCCCAAGATGAATAGTTGGCATAGTTTATGGTTAAGACTACGACGGTATCTGATCGTCTTCGATCCCCTAACTTTCGTTCCTGATTAATGAAAACATCCTTGGCAAATGCTTTCGCAGTAGTTAGTCTTCAATAAATCCAAGAATTTCACCTCTGACAATTGAATACTGGTGCCCCCGACTGTCCCTATTAATCATTACGGCGGTCCTAGAAACCAACAAAATAGAACCACACG	AF279399	330	1.215e-137	0.93	1	384	10	46	13	53	4	0	0	0	0	0	0	3	0	2	1	0	14	0	0	0	0	1	0	0	0	0	15	19
S1196_0744	Ascomycota	Fungi_other	CCCCGTGTTGAGTCAAATTAAGCCGCAGGCTCCACGCCTGGTGGTGCCCTTCCGTCAATTTCTTTAAGTTTCAGCCTTGCGACCATACTCCCCCCAGAACCCAAACACTTATGATTTCTCGTAAGGTGCCGATGGAGTCAAAATAAAAACATCCACCGATCCCTAGTCGGCATCGTTTACTGTTAAGACTACGACGGTATCTGATCGCCTTCGATCCCCTAACTTTCGTTCACTGATTAATGAAAACATCCTTGGTATGTGCTTTCGCAGTAGTTAGTCTTCAGCAAATCCAAGAATTTCACCTCTGACAGCTGAATACTCGAACCCCCGACTGTCCCTATTAATCATTACGGCTTTCTTAGAAACCAACGAAATAAGATAGCCG	DQ767649	331	4.39441e-138	0.93	1	379	0	0	0	0	5	1	0	0	0	0	0	0	0	1	0	0	0	0	0	0	0	0	0	0	0	0	0	0
S1196_0745	Ascomycota	Fungi_other	CCCCGTGTTGAGTCGAATTAAGCCGCAGGCTCCACCCCTGGTGGTGCCCTTCCGTCAATTTCTTTAAGTTTCACTCTTGCGACCATACTCCCCCAGGAGCCCAAACATTTTGATTTATCGTAAGGTGCCGGACGAGTCAATATTTAACGTCGTCCGATCCCTAATCGGCATAGTTTATGGCTAGGACTACGACGGTATCTGATCGTCTTCGATCCCCTAACTTTCGTTCCTGATTAATGAAAACATCCTTGGCAAATGCTTTCGCAGTAGTTAGTCTTCAGCTGATCCAAGAATTTCACCTCTAACAGCAGAATACTGATGCCCCCGACTGTCCCTATTAATCATTACGGCGGTCCTAGCAACCAACAAATAGAACCACGCG	DQ470989	341	1.6187e-142	0.94	1	382	0	0	0	0	0	0	0	0	0	0	0	15	0	0	0	0	0	0	0	0	0	0	0	0	0	0	0	0
S1196_0746	Glomeromycota	Glomeromycetes	CCCCGTGTTGAGTCAAATTAAGCCGCAGGCTCCACTCCTGGTGGTGCCCTTCCGTCAATTCCTTTAAGTTTCAGCCTTGCGACCATACTCCCCCCGGAACCCAAAAACTTTGATTTCTCATAAGGTGCCAAGCAAGTCAAAATATCCTTGCCTGATCCCTAGTCGGCATAGTTTATGGTTAAGACTACGACGGTATCTGATCGTCTTCGATCCCCTAACTTTCGTTCTTGATTAATGAAAACATCCTTGGCAAATGCTTTCGCAGAAGTTAGTCTTTCATAAATCCAAGAATTTCACCTCTGACAATTAAATACTAATGCCCCCAACTATCCCTATTAATCATTACTTCGGTCCTAGAAACCAACAAAATAAAACCAAAG	AF229771	374	3.87413e-157	0.99	1	380	94	1952	476	78	80	5	1244	5	0	2	835	65	272	6200	4659	2562	1899	765	153	99	466	1269	599	3708	1203	946	393	7
S1196_0747	Basidiomycota	Exobasidiomycetes	CCCCGTGTTGAGTCAAATTAAGCCGCAGGCTCCACTCCTGGTGGTGCCCTTCCGTCAATTTCTTTAAGTTTCAGCCTTGCGACCATACTCCCCCCAGAACCCAAAAACTTTGATTTCTCGCAAGGTGCCGAACGAGTCAAAAAAATAACATCGTCCGATCCCTAGTCGGCATAGTTTACTGTTAAGACTACAACGGTATCTAATCGTTTTCGATCCCCTAACCTTCGTTCTTGATTAATGAAAACATCCTTGGCAAATGCTTTCGCAGTAGTTCGTCTTCACAAAATCCAAGAATTTCACCTCTAGCATGTGAATACGAATGCCCCCGACTATCCCTATTAATCATTACGGCGATCCTAGAAACCAACGAAATAGGATCGCGACG	DQ363306	378	6.65002e-159	0.99	1	385	5	6	1	8	3	9	994	57	0	2	7	2	10	6	139	11	1	17	4	1	0	2	93	12	4	11	3	2
S1196_0749		Fungi_other	CCCCGTGTTGAGTCAAATTAAGCCGCAGGCTCCACTCCTGGTGGTGCCCTTCCGTCAATTCCTTTAAGTTTCAGCCTTGCGACCATACTCCCCCCGGAACCTAAAAACTTTGATTTCTCATAGAGTGCCAAACCAGTCATATAAATAACATGGTCTGATCCTCAGTCGGCATAGTTTATGGTTAAGACTACGACGGTATCTAATCGTCTTCGATCCCCTAACTTTCGTTCTTGATTAATGAAAACATCCTTGACAAATGCTTTCGCATTAGTTTGTCTCAGATCGATCCAAGGATTTCACCCCTAACGATCTGATACAAATGTCCCCAACTGTCCCTATTAATCATTACCTTGGTCCTATAAACCAACAAAATAGAACCACGGTCCTATTTCATTATTC…	AF368505	330	1.29551e-137	0.9	1	406	25	55	84	70	33	20	18	0	0	18	11	28	15	9	26	10	0	20	16	57	6	104	0	31	29	92	3	16
S1196_0750	Cryptomycota	Cryptomycota	TCCCGTGTTGAGTCAAATTAAGCCGCAGGCTCCACTCCTGGTGGTGCCCTTCCGTCAATTCCTTTAAGTTTCAGCCTTGCGACCATACTCCCCCCAGAACCCAAAAACTTTGATTTCTCATAAGGTGCCGATGGAGTCATATACGACGTCCACCGATCCCTAGTCGGCATAGTTTATGGTTAAGACTACGACGGTATCTGATCGTCTTCGATCCCCTAACTTTCGTTCTTGATTAATGAAAACATCCTTGGCAAATGCTTTCGCATTAGTTAGTCTTCAATAAATCCAAGAATTTCACCTCTGACTATTGAATACTAATGCCCCCAACTATCCCTATTAATCATTACTTTGGTCCTCAAACCAACAAAATAGAACCAAAG	AF372713	363	2.8904e-152	0.97	1	380	1	3	5	1	2	3	14	0	0	0	1	0	0	3	1	9	1	0	0	4	5	5	1	24	0	6	0	2
S1196_0751	Ascomycota	Fungi_other	CCCCGTGTTGAGTCAAATTAAGCCGCAGGCTCCACTCCTGGTGGTGCCCTTCCGTCAATTTCTTTAAGTTTCAGCCTTGCGACCATACTCCCCCAGGAGCCCACACATTCTGATTTGTCGTAGGGTGCCGAGCGAGCCAAAGAACAGCGTCGCCCGATCCCCGATCGGCATGGTTTATGGTTAAGACTACAACGGTATCTGATCGTTTTCGATCCCCTAACTTTCGTTCCTGATTAATGAAAACATCCTTGGCGAATGCTTTCGCAGTAGTTCGTCTTCGACCGGTCCAAGAATTTCACCTCTGACGGTCGAATACGGACGCCCCCGACTGTCCCTATTAATCATTACGGCGGTCCTAGAAACCAACAAAATAGAACCGCACG	AY502933	327	2.58349e-136	0.92	1	383	0	0	0	0	0	0	0	0	0	0	3	0	0	0	0	0	0	0	0	0	0	0	0	0	0	0	0	0
S1196_0753	Basidiomycota	Agaricomycetes	CCCCGTGTTGAGTCAAATTAAGCCGCAGGCTCCACTCCTGGTGGTGCCCTTCCGTCAATTCCTTTAAGTTTCAGCCTTGCGACCATACTCCCCCCCGAACCCAAAAACTTTGATTTCTCGTAAGGTGCCGAACGACACATAAAGATGAGTTCGTCCGATCCCTAGTCGGCATAGTTTACTGTTAAGACTACAACGGTATCTGATCGTTTTCGATCCCCTAACCTTCGTTCTTGATTAATGAAAACATCCTTGGCAAATGCTTTCGCAGTAGTTAGTCTTCAGTAAATCCAAGAATTTCACCTCTAGCAACTGAATACTAATGCCCCCAACTATCCCTATTAATCATTACGGCGACTCTAGAAACCAACAAAATAGAACCGCACG	AF334938	372	3.01578e-156	0.98	1	384	11	1	23	14	55	7	66	0	0	2	3	193	44	17	1	1	1	2	1	6	2	932	8	0	0	5	0	4
S1196_0754	Ascomycota	Fungi_other	CCCCGTGTTGAGTCAAATTAAGCCGCAGGCTCCACTCCTGGTGGTGCCCTTCCGTCAATTTCTTTAAGTTTCAGCCTTGCGACCATACTCCCCCCAGAGCGCAGAGACTTTACTTTCGTGTAAGGTGCCGAGCGAGTCGAAGAAAAACATCGCCCGATCCCTAGTTCGCATAGTTTATGGTTAAGACTACGACGGTATCTGATCGTCTTCGATCCCCTAACTTTCGTTCCTGATTAATGAAAACATCCTTGGCAGATGCTTTCGCAGTAGTTGGTCTTCCAAAGATCCTTAGATTTCACCCTTAGCTTTGGAATTCCGATGCCCCCGACTGTCCCTATTAATCATTACGGCGGTCCTAGAAACCAACAAAATAGAACCGCAACG	DQ862046	326	7.18615e-136	0.92	1	384	0	1	0	0	1	1	0	0	0	0	97	0	1	2	13	74	0	0	0	0	0	0	1	2	5	2	1	0
S1196_0756	Ascomycota	Fungi_other	CCCCGTGTTGAGTCAAATTAAGCCGCAGGCTCCACGCCTGGTGGTGCCCTTCCGTCAATTTCTTTAAGTTTCAGCCTTGCGACCATACTCCCCCCAGAACCCAAACACTTTGATTTCTCGCAAGGTGCCGAGCGGGTCGTCAAATGAGCCCCGCCCGATCCCTAGTCGGCATGGTTTACGGTTAAGACTACGACGGTATCTGATCGTCTTCGATCCCCTAACTTTCGTTCGACTGATTAATGAAAACATCTTTGGCAAATGCTTTCGCAGTGGTTAGTCTTCGGCAAATCCAAGAATTTCACCTCTGACAGCCGAATACTGATGCCCCCAACCATCCCTGTTAATCATTACGGCGGCGCTAGAAACCAACAAAATAGAACCGCACGTCCTATTCCATTA…	FJ358349	365	4.09065e-153	0.94	1	409	0	1	0	1	23	0	0	0	0	0	0	0	0	0	0	0	0	0	0	0	0	0	0	0	0	0	2	0
S1196_0759	Chytridiomycota	Chytridiomycetes	CCCCGTGTTGAGTCAAATTAAGCCGCAGGCTCCACTCCTGGTGGTGCCCTTCCGTCAATTCCTTTAAGTTTCAGCCTTGCGACCATACTCCCCCCAGAACCCAAAAACTTTGATTTCTCGTAAGGTGCCGATGGAGTCATTGTTTAAACTAACGTCCACCGATCCCTAGTCGGCATAGTTTATGGTTAGGACTACGACGGTATCTGATCGTCTTCGATCCCCTAACTTTCGTTCTTGATTAATGAAAACATCCTTGGCAAATGCTTTCGCACTAGTTAGTCTTTCATAAATCCAAGAATTTCACCTCTGACAATGAAATACTAATGCCCCCAACTGTCCCTATTAATCATTACTTCGGTCTTAAAACCAACAAAATAAAACCAAAG	DQ536490	340	4.54339e-142	0.94	1	386	0	0	0	0	0	1	0	0	0	0	0	0	0	0	0	0	0	5	0	0	0	0	0	0	0	0	0	0
S1196_0760	Ascomycota	Sordariomycetes	CCCCGTGTTGAGTCAAATTAAGCCGCAGGCTCCACTCCTGGTGGTGCCCTTCCGTCAATTTCTTTAAGTTTCAGCCTTGCGACCATACTCCCCCTAGAGCCCAAGCACTTTGATTTCTCGAAAGGTGCCGAACGAGTCAAAAAGCAACATCGTCCGATCCCTAGTCGGCATCGTTTATAGTTAAGACTACGACGGTATCTGATCGTCTTCGAACCCCTAACTTTCGTTCCTTATCAATGAAAACATCCTTGGCAAATGCTTTCGCAGTAGTTAGTCTTCAATAGATCCAAGAATTTCACCTCTGACAATTGAATACTGATGCCCCCGACTGTCCCTATTAATCATTACGGCGGTCCTAGAAACCAACAAAATAGAACCACGCGTCCTATTCCATTATTC…	AF352086	387	7.22542e-163	0.98	1	403	0	0	0	1	25	0	0	0	0	0	0	1	8	0	1	0	0	0	0	0	0	0	1	0	0	0	0	0
S1196_0761	Chytridiomycota	Chytridiomycetes	CCCCGTGTTGAGTCAAATTAAGCCGCAGGCTCCACTCCTGGTGGTGCCCTTCCGTCAATTCCTTTAAGTTTCAGCCTTGCGACCATACTCCCCCCGGAACCTAAAAACTTTGATTTCTCATAAGGTGCCGAACGACTCAGTAAAGTAACATCGTCCGATCCCTAGTCGGCATAGTTTATGGTTAAGACTACGACGGTATCTGATCGTCTTCGATCCCCTAACTTTCGTTCTTGATCAATGAAAACATCCTTGGCAAATGCTTTCGCAGAAGTTAGTCTTTAATAAATCTAAGAATTTCACCTCTGACAATTAAATACTAATGCCCCCAACTATCCCTATTAATCATTACTTCGGTCCTAGAAACCAACAAAATAGAACCAAAG	JN020240	369	6.41254e-155	0.98	1	383	15	54	8	3	19	0	5	0	0	1	19	42	2	4	3	8	11	29	42	0	3	4	6	11	6	45	14	0
S1196_0762	Ascomycota	Eurotiomycetes	CCCCCGTGTTGAGTCAAATTAAGCCGCAGGCTCCACGCCTTGTGGTGCCCTTCCGTCAATTTCTTTAAGTTTCAGCCTTGCGACCATACTCCCCCCAGAACCCAAAAACTTTGATTTCTCGTAAGGTGCCGAACGGGTCATCATAGAATCCCGTCCGATCCCTAGTCGGCATAGTTTATGGTTAAGACTACGACGGTATCTGATCGTCTTCGATCCCCTAACTTTCGTTCCCTGATTAATGAAAACATCCTTGGCGAATGCTTTCGCAGTAGTTAGTCTTCAGCAAATCCAAGAATTTCACCTCTGACAGCTGAATACTGACGCCCCCGACTATCCCTATTAATCATTACGGCGGTCCTAGAAACCAACAAAATAGAGCCGCACG	GQ120164	382	1.12435e-160	0.99	2	385	15	15	6	25	99	114	481	198	1	3	16	28	12	2	133	13	0	2	0	228	5	4	630	25	62	8	3	8
S1196_0764	Ascomycota	Sordariomycetes	CCCCGTGTTGAGTCAAATTAAGCCGCAGGCTCCACCCCTGGTGGTGCCCTTCCGTCAATTTCTTTAAGTTTCAGCCTTGCGACCATACTCCCCCAGGAGCCCAAACATTTTGATTTATCGTAAGGTGCCGAACGGGTCAAAAAATAACGCCGTCCGATCCCTAATCGGCATAGTTTATGGTTAAGACTACGACGGTATCTGATCGTCTTCGATCCCCTAACTTTCGTTCCTGATTAATGAAAACATCCTTGGCAAATGCTTTCGCAGTAGTTAGTCTTCAATAAATCCAAGAATTTCACCTCTGACAATTGAATACTGATGCCCCCGACTGTCCCTATTAATCATTACGGCGGTCCTAGAAACCAACAAAATAGAACCACACGTCCTATTCCATTATTC…	AY545725	401	4.54085e-169	0.99	1	403	477	852	646	1315	751	448	997	76	0	14	409	1192	664	94	120	72	512	21	24	43	161	401	99	573	137	117	166	352
S1196_0766	Chytridiomycota	Chytridiomycetes	CCCCGTGTTGAGTCAAATTAAGCCGCAGGCTCCACTCCTGGTGGTGCCCTTCCGTCAATCCCTTTAAGTTTCAGCCTTGCGACCATACTCCCCCCGGAACCCAAAAACTTTGATTTCTCATAAGGTGCCGAACGAGACATGATAATATACTCGTCCGATCCCTAGTTGGCATAGTTTATGGTTAAGACTACGACGGTATCTGATCGTCTTCGATCCCCTAACTTTCGTTCTTGATCAATGAAAACATCCTTGGCAAATGCTTTCGCAGAAGTTAGTCTTTCATAAATCCAAGAATTTCACCTCTGACAATTAAATACTAATGCCCCCAACTATCCCTATTAATCATTACTTCAGTCTTAGAAACCAACAAAATAAGACCAAAGTCCTATTCCATTATTC…	JN020240	376	5.4368e-158	0.96	1	406	5	5	3	6	0	0	0	2	0	0	0	0	0	3	7	5	103	12	24	0	3	0	0	3	0	1	0	0
S1196_0767	Basidiomycota	Agaricomycetes	CCCCGTGTTGAGTCAATTTGCGGGTGTTTCACTCCTGGTGGTGCCCTTGCGTCAATTCCTTTAAGTTTCAGCCTTGCGACCATACTCCCCCCAGAACCCAAAGACTTTGATTTCTCGTAAGGTGCCGAACGACGCATAATATTGAGGTCGTCCGATCCCTAGTCGGCATAGTTTACTGTTAAGACTACAACGGTATCTGATCGTTTTCGATCCCCTAACCTTCGTTCTTGATTAATGAAAACATCCTTGGCAAATGCTTTCGCAATAGTTTGTCTTGCGTAAATCCAAGAATTTCACCTCTAGCAACGCAATACAAATGCCCCCAACTATCCCTATTAATCATTACGGCGACTCTAGAAACCAACAAAATAGAACCGCACG	U59093	355	1.0142e-148	0.96	1	381	0	0	0	0	0	0	0	0	0	0	0	0	0	0	0	0	0	0	0	0	3	0	0	0	0	68	0	0
S1196_0771	Ascomycota	Pezizomycetes	CCCGGTGTTGAGTCAAATTAAGCCGCAGGCTCCACTCCTGGTGGTGCCCTTCTGTCAATTCCTTTAAGTTTCAGCCTTGCGACCATACTCCCCCCAGAAGCCAAAGACTTTGATTTCTCGTAAGGTACTGCGAGAGTCAAAATAGAACATCACCCAATCCCTAGTCGGCATAGTTTATGGTTAAGACTACGAGGGTATCCGATCGCCTTCGATCCCCTAACTTTCATTCCCTAATTAATGAAAACATCCTTGGCAAATGCTTTCGTAGTACTTAGTCTTCAATCGATCCAAGAATTTCACCTCTGACGATTGAATACTGATGCCCCCGACTATCCCTATTAATCATTACGGTGGTCCTAGAAACCAACAAAATAGAACCACACGTCCTATTCTATTATT…	DQ646530	377	1.96602e-158	0.96	1	407	0	0	0	0	0	4	0	0	0	0	0	0	0	0	0	0	0	0	0	0	0	0	0	0	0	0	0	0
S1196_0773	Ascomycota	Fungi_other	CCCCGTGTTGAGTCAAATTAAGCCGCAGGCTCCACCCCTGTGATAAAGAGTTAGTATGCTGTAAAAAATCGAATTATAGTGAGGGTTAGGGTGCTTACCTGGTGGTGCCCTTCCGTCAATTTCTTTAAGTTTCAGCCTTGCGACCATACTCCCCCCAGAACCCAAGAACTTTGATTTCTCGTAAGGTGCCGAACGAGTCAAATAATAACATCGTCCGATCCCTAGTCGGCATAGTTTATGGTTAAGACTACGACGGTATCTGATCGTCTTCGATCCCCTAACTTTCGTTCCTGATTAATGAAAACATCCTTGGCAAATGCTTTCGCAGTAGTTAGTCTTCAACAAATCCAAGAATTTCACCTCTGACAGTTGAATACTGATGCCCCCGACTGTCCCTAT…	JQ301649	342	6.90701e-143	0.9	1	442	0	0	0	0	0	0	0	0	0	0	0	0	0	0	0	0	0	27	0	0	0	0	0	0	0	0	0	0
S1196_0775	Basidiomycota	Agaricomycetes	CCCCGTGTTGAGTCAAATTAAGCCGCAGGCTCCACACCTGGTGGTGCCCTTCCGTCAATTCCTTTAAGTTTCAGCCTTGCGACCATACTCCCCCCAGAACCCAAAGACTTTGATTTCTCGTAAGGTGCCGAACAACACATCAAAAAGAGGTCATCCGATCCCTAGTCGGCATAGTTTACTGTTAAGACTACAACGGTATCTGATCGTTTTCGATCCCCTAACCTTCGTTCTTGATTAATGAAAACATCCTTGGCAAATGCTTTCGCAATAGTTCATCTTCAGTCAATCCAAGAATTTCACCTCTAGCGACCAAATATGAATGCCCCCAACTATCCCTATTAATCATTACGGCAGCTCTAAAAACCAACAAAATAGAACTACACG	GU187661	372	3.01578e-156	0.98	1	384	62	187	42	9	557	18	1	0	0	5	10	4	53	50	1	13	46	2	33	3	4	1	7	10	55	366	58	0
S1196_0776	Glomeromycota	Glomeromycetes	CCCCGTGTTGAGTCAAATTAAGCCGCAGGCTCCACTCCTGGTGGTGCCCTTCCGTCAATTCCTTTAAGTTTCAGCCTTGCGACCATACTCCCCCCGGAACCCAAAAACTTTGATTTCTCGTAAGGTGCCAAACAGGTCAATAGATACCTGTCTGATCCCTAGTCGGCATAGTTTATGGTTAAGACTACGACGGTATCTGATCGTCTTCGATCCCCTAACTTTCGTTCTTGATTAATGAAAACATCCTTGGCAAATGCTTTCGCAGTAGTTAGTCTTTCATAAATCCAAGAATTTCACCTCTGACAATTAAATACTAATGCCCCCAACTATCCCTATTAATCATTACTTCGGTCCTAGAAACCAACAAAATAGAACCAAAG	AF229771	362	8.01565e-152	0.97	1	380	26	2	26	29	78	51	14	0	0	5	25	21	175	3	8	37	0	16	0	20	10	28	1	9	0	20	15	2
S1196_0778	Ascomycota	Sordariomycetes	CCCCGTGTTGAGTCAAATTAAGCCGCAGGCTCCACCCCTGGTGGTGCCCTTCCGTCAATTTCTTTAAGTTTCAGCCTTGCGACCATACTCCCCCAAGAACCTAGAAACTTTGATTTCTCGTAAGGTGCCGAACGAGTCAAAAAATAACACCGTCCGATCCCTAGTCGGCATAGTTTATGGTTAAGACTACGACGGTATCTGATCGTCTTCGATCCCCTAACTTTCGTTCCTGATTAATGAAAACATCCTTGGCAAATGCTTTCGCAGTAGTTAGTCTTCAATAAATCCAAGAATTTCACCTCTGACAATTGAATACTGATGCCCCCGACTGTCCCTATTAATCATTACGGCGGTCCTAGAAACCAACAAAATAGAACCACACGTCCTATTCTATTATTC…	AF279399	389	9.44865e-164	0.98	1	405	52	115	31	58	638	25	256	59	0	22	38	327	412	243	51	21	49	42	33	4	13	30	150	50	30	23	23	14
S1196_0779	Basidiomycota	Agaricomycetes	CCCTGTGTTGAGTCAAATTAAGCCACAGGCTCCACACCTGGTGGTGCCCTTCTGTCAATTCCTTTAAGTTTCAGCCTTGCGACCATACTCCCCCCAGAACCCAAAGACTTTGATTTCTTGTAAGGTGCTGAGCAACACATCATAAAGAGGTCACCCGATCCCTAGTTGGCATAGTTTACTGTTAAGACTACAATGGTATCTGATTGTTTTCGATCCCCTAACCTCCATTCTTGATTAATGAAAACATCCTTGGCAAATGCTTTCGCAGTAGTTCATCTTCAGTCAATCCAAGAATTTTACCTCTAGCGACTGAATATGAATGCCAACTATCCCTATTAATCATTACGGCAGCTCTAAAAACCAACAAAATAGAACTACACG	DQ444862	348	1.27934e-145	0.95	1	381	0	0	0	0	0	0	0	0	0	0	0	0	0	0	0	0	9	0	0	0	0	0	0	0	0	0	0	0
S1196_0782	Ascomycota	Fungi_other	CCCCGTGTTGAGTCAAATTAAGCCGCAGGTTCCACTCCTGGTGGTGCCCTTCCGTCAATTCCTTTAAGTTTCAGCCTTGCGACCATACTCCCCCCAGAACCCAAAAACTTTGATTTCTCTCGAGCCGCCAAGCGAGTCAATATGAATGATACGTCGCCTGATTGCTAGTCGGCATAGTTTATGGTTAAGACTACGACGGTATCTAATCGTCTTCGATCCCCTAACTTTCGTTCTTGATTAATGAAAACATCCTTGGCAAATGCTTTCGCAGTAGTTAGTCTTCCGAAAATCCAAGAATTTCACCTCTGACAACGGAATACTAATGCCCCCAACTGTCCCTATTGATCATTACGGAGCTCCAGAAAACCAACAAAATAGGAGTTCACG	AF010590	314	1.50026e-130	0.91	1	387	0	0	0	0	0	0	0	0	0	0	0	0	0	217	1	0	439	5	2	0	0	0	0	0	0	0	0	0
S1196_0783	Basidiomycota	Agaricomycetes	CCCCGTGTTGAGTTCGCCCGATCCCTAGTCGGCATAGTTTACTGTTAAGACTACAACGGTATCTGATCGTTTTCGATCCCCTAACCTTCGTTCTTGATTAATGAAAACATCCTTGGCAAATGCTTTCGCAGTAGTTAGTCTTCAGTAAATCCAAGAATTTCACCTCTAGCAACTGAATACTAATGCCCCCAACTATCCCTATTAATCATTACGGCGACTCTAGAAACCAACAAAATAGAACCGCACG	U59082	240	5.30255e-98	1	8	247	0	0	0	0	0	0	0	0	0	0	0	0	1	1	0	0	0	0	0	0	2	0	0	0	0	0	0	1
S1196_0784	Ascomycota	Eurotiomycetes	TCCCGTGTTGAGTCAAATTAAGCCGCAGGCTCCACGCCTTGTGGTGCCCTTCCGTCAATTTCTTTAAGTTTCAGCCTTGCGACCATACTCCCCCCCGAGTGCGAAAACTTTGATTTCTCGTAAGGTGCCGAACGGGGCATAAAAAAACCACCGTCCGATCCCTAGTCCACATAGTTTATGGTTAAGACTACGACGGTATCTGATCGTCTTCGATCCCCTAACTTTCGTTCACTGATTAATGAAAACATCCTTGGCGAATGCTTTCGCAATAGTTAGTCTTCAATAAATCCAAGAATTTCACCTCTGACAATTGAATACTGACGCCCCCGACTATCCCTATTAATCATTACAGCGGTCCTAGAAACCAACAAAATAGAACCGATGTCCTATTCTATTATT…	EU940018	407	1.00966e-171	1	1	407	4	1	0	1	4	0	0	0	0	3	223	3	0	8	0	1	11	278	78	0	0	1	1	0	4	1	0	0
S1196_0785	Basidiomycota	Fungi_other	CCCCGTGTTGAGTCAAATTAAGCCGCAGGCTCCACACCTGGTGGTGCCCTTCCGTCAATTCCTTTAAGTTTCAGCCTTGCGACCATACTCCCCCCAGAACCCAAAGACTTTGATTTCTCGCAAGGTGCCGAGCGACACATGAAATGGAGTTCGCCCGATCCCTAGTCGGCATAGTTTACTGTTAGGACTACAACGGTATCTAATCGTCTTCGCTCCCCTAACCTTGGCTCACTGATCAATGAAAACATCCTTGGCAGATGCTTTCGCAGAAGTTGGTCTTTGGTCAATCCAAGAATTTCACCTCTAGCGACCAAATACCAATGCCCCCAACTGTCCCTATTAATCATTACAGCGACTCTAGAAACCAACAAAATAGAACCGCACG	KJ417155	341	1.63342e-142	0.94	1	384	2	20	10	1	11	1	0	0	0	3	1	6	10	3	2	3	1	0	1	2	2	1	0	10	0	2	0	0
S1196_0786	Chytridiomycota	Chytridiomycetes	TCCCGTGTTGAGTCAAATTAAGCCGCAGGCTCCACTCCTGGTGGTGCCCTTCCGTCAATTCCTTTAAGTTTCAGCCTTGCGAACCATACTCCCCCCGGTACCCAAAGACTTTGATTTCTCATAAGGTGCCAAACCATACATTATAACATGGTCTGATCCCTAGTCGGCATAGTTTATGGTCAAGACTACGACGGTATCTAATCGTCTTCGATCCCCTGACTTTCGTCCTTGATTAATGAAAACATCCTTGGCAAATGCTTTCGCAGAAGTTAGTCTTTCATAAATCCAAGAATTTCACCTCTGACAATTAAATACTAATGCCCCCAACTATCCCTATTAATCATTACTTCGGTCCTAGAAACCAACAAAATAGAACCAAAG	DQ536484	350	1.66351e-146	0.96	2	381	0	0	0	5	0	0	0	0	0	0	0	0	0	2	0	0	21	0	0	0	0	0	0	0	0	1	0	0
S1196_0787	Blastocladiomycota	Blastocladiomycetes	CCCCGTGTTGAGTCAAATTAAGCCGCATAATCCACTCCTGGTGGTGCCCTTCCGTCAATTCCTTTAAGTTTCAGCCTTGCGACCATACTCCCCCCAGAACCCAAAAACTTTGATTTCTCAAAAGGTGCCGGACGGGTCTGTATATCTACAACCGTCCGATCCCTGGTCGGCATCGTTTATGGTTAAGACTACGACGGTATCTAATCGTCTTCGATCCCTTAACTTTCGTCCTTGATTAATGAAAACATCCTTGGCAAATGCTTTCGCAGAAGTTAGTCTTTCCTAAATCCAAGAATTTCACCTCTGACAATTAAATACTAATGCCCCCAACTATCCCTATTAATCATTACTCTAGTCCTAGAAACCAACAAAATAGAACCAAAGTCCTATTCTATTATT…	U23936	370	2.47999e-155	0.95	1	407	0	0	0	0	0	0	0	0	0	0	0	0	9	0	0	0	0	0	0	0	0	0	0	0	0	0	0	0
S1196_0789	Ascomycota	Sordariomycetes	CCCCGTGTTGAGTCAAATTAAGCCGCAGGCTCCACCCCTGGTGGTGCCCTTCCGTCAATTTCTTTAAGTTTCAGCCTTGCGACCTGCAGCAGCGTGTGGTTAGCATCGACGTTTGTGTGGCGCGGATCGCGTTGCGGGGGAGGAGAAGAACTTACCATACTCCCCCCAGAACCCAGAAACTTGTACTTTCGTGTAAGGTGCCGAACGAGTCAAAAAGAAACATCGTCCGATCCCTGGTCGGCATAGTTTATGGTTAAGACTACGACGGTATCTGATCGTCTTCGATCCCCTAACTTTCGTTCCTGATTAATGAAAACATCCTTGGTAAATGCTTTCGCAGTAGTTAGTCTTCAATAAATCCAAGAATTTCACCTCTGACAATTGAATACTGATACCCCC…	AF279373	289	2.13982e-119	0.97	154	456	0	0	0	0	0	0	0	0	0	0	0	0	0	0	0	0	0	0	25	0	0	0	0	0	0	0	0	0
S1196_0792	Olpidiomycota	Olpidiomycetes	CCCCGTGTTGAGTCAAATTAAGCCGCAGGCTCCACTCCTGGTGGTGCCCTTCCGTCAATTCCTTTAAGTTTCAGCCTTGCGACCATACTCCCCCCAGAACCCAAAAACTTTGATTTCTCAGAAGGTGCCGAACGAGTCAATAAAAACTCCGTCCGATCCCTAGTCGGCATAGTTTATGGTTAAGACTACGACGGTATCTAATCGTCTTCGATCCCCTAACTTTCGTTCTTGATTAATGAAAACATCCTTGGCAAATGCTTTCGCAGTAGTTAGTCTTCAATAAATCCAAGAATTTCACCTCTGACAATTGAATACTAATGCCCCCGACTATCCCTATTAATCATTACGGCGGTCTTAGAAACCAACAAAATAAGATCGACG	AY987433	349	4.61324e-146	0.97	1	372	0	0	0	2	1	28	0	1	0	4	1	1	10	565	3	0	1309	13	0	1	3	1	0	0	0	2	0	2
S1196_0793		Fungi_other	CCCCGTGTTGAGTCAAATTAAGCCGCAGGCTCCACTCCTGGTGGTGCCCTTCCGTCAATTCCTTTAAGTTTCAACCTTGCGATCATACTCCCCCCAGAACCCAAACACTTTACTTTCGCTAAACTGCTGAGAGAGCCAAAAATTTTGAAACTCTCCCAATCGCTAGTCGGCATAGTTTGTGGTTAAGACTACGACGGTATCTGATCGTCTTCGATCCCCTAACTTTAGACCTTGATCAATGGAAATGTCCTTGACAAATGCTTTCGCAGTAGTTTGTCCCCAGCTAATCCAAGAATTTCACCTCTGACAGCTGAATACAAATGTCCCCGACCATTCCTATTCATCATTACTTGATCCTATCCAACCAACGAAATGAACCAAGTCCTATTCCATTATTCC…	AY500849	288	5.2046e-119	0.87	1	405	0	0	0	0	0	0	0	0	0	0	0	0	0	0	14	0	0	0	0	0	0	0	0	0	0	0	0	0
S1196_0794	Chytridiomycota	Chytridiomycetes	CCCCGTGTTGAGTCAAATTAAGCCGCAGGCTCCACTCCTGGTGGTGCCCTTCCGTCAATTCCTTTAAGTTTCAGCCTTGCGACCATACTCCCCCCGGAACCTAAAAACTTTGATTTCTCATAAGGTGCCGAACAAGTCATAATTGAACATTGTCCGATCCCTAGTCGGCATAGTTTATGGTTAAGACTACGACGGTATCTGATCGTCTTCGATCCCCTAACTTTCGTTCTTGATTAATGAAAACATCCTTGGCAAATGCTTTCGCAGTAGTTAGTCTTCAATCAATCCAAGAATTTCACCTCTGACGATTGAATACTAATGCCCCCAACTGACCCTATTAATCATTACTTCGGTCTTAGAAACCAACAAAATAAAACCAAAGTCCTATTCCATTATTCC…	DQ536479	399	3.49219e-168	0.99	1	403	933	2223	915	160	1302	4	135	0	0	8	49	1182	113	94	31	51	136	53	10	30	18	572	33	282	40	129	343	49
S1196_0795	Ascomycota	Sordariomycetes	CCCCGTGTTGAGTCAAATTAAGCCGCAGGTTCCACCCCTGGTGGTGCCCTTCCGTCAATTTCTTTAAGTTTCAGCGTTGCCGCCATACTCCCCCTGGAGCCCACGCACTTTGATTTCTCGAATGGTGCCGAGCGCGTCTAGAAAGAACAGCGCCCGATCCCAAGTCGGCACCGTTTATGGTTAAGACTACGACGGTATCTGATCGTCTTCGATCCCCTAACTTTCGTTCCTGATCAGCGAAAACGTCCTTGGCAAATGCTTTCGCAGTAGTTAGTCTTCGGCCGGTCTAAGAATTTCACCTCTCGCGGCCGAATACTGATGCCCCCGACCGTCCCTATTGATCATTACGGCGGTCCTAGGAACCAACAAAACAGAACCGACG	AY484511	346	9.86881e-145	0.95	1	382	13	3	0	6	18	64	5	0	0	13	3	104	230	250	4	0	4	0	0	14	12	45	9	6	6	6	0	1
S1196_0798	Ascomycota	Eurotiomycetes	CCCCGTGTTGAGTCAAATTAAGCCGCAGGCTCCACGCCTGGTGGTGCCCTTCCGTCAATTTCTTTAAGTTTCAGCCTTGCGACCATACTCCCCCCAGAACCCAAAAACTTTGATTTCTCGTAAGGTGCCGAACGGGTTATTAAAAGTTGCCCGTCCGATCCCTAGTCGGCATAGTTTATGGTTAAGACTACGACGGTATCTGATCGTCTTCGATCCCCTAACTTTCGTTCACTGATTAATGAAAACATCCTTGGCGAATGCTTTCGCAGTAGTTAGTCTTCAGCAAATCCAAGAATTTCACCTCTGACAGCCGAATACTGACGCCCCCGACTATCCCTATTAATCATTACGGCGGTCCTAGAAACCAACAAAATAGAACCACACG	JN941602	385	5.27182e-162	1	1	385	2	3	11	2	42	4	10	0	0	0	8	0	3	0	5	1	0	0	0	2	7	1	4	5	2	3	0	0
S1196_0799	Chytridiomycota	Chytridiomycetes	CCCCGTGTTGAGTCAAATTAAGCCGCAGGCTCCAAACCTGGTGTGCCCTTCCGTCAATTCCTTTAAGTTTCAGCCTTGCGACTATACACCCCCCAGAACCCAAAAACTTTGATTTCTCCTACGGTGCTGATGAGGTCAAAAAATATCACGCTCACCGATCCCGAGTCGGCATAGTTTATGGTTAGGACTACGACGGTATCTAATCGTCTTCGATCCCCTAACTTTCGTTCTTGATTAATGAAAACATCCTTGGCAAATGCTTTCGCAGAAGTTAGTCTTTCATAAATCCAAGAATTTCACCTCTGACAATTAAATACTAATGCCCCCAACTGTCCCTATTAATCATTACTTCAGTCCTAGAAACCAACAAAATAAGACCAAAGTCCTATTTTATTATTC…	HQ901772	352	2.3274e-147	0.93	2	406	0	0	0	0	0	2	0	0	0	0	0	6	0	0	0	0	0	0	0	0	0	0	0	0	0	0	0	0
S1196_0800	Ascomycota	Fungi_other	CCCCGCAATTGGAGTGTGTGGCCGGCCACGCGGGCCGACTAGCATTTACTGTTTAGAGGATCACCACATCACCCTTTCGGGCTGCTGTTCGGCGCAGAGTCTACTGCGGCTAGCGGTAAAGGTTTACGCCTTGTGGTGCCCTTCCGTCAATTTCTTTAAGTTTCAGCCTTGCGACCATACTCCCCCCAGAACCCAAAAACTTTGATTTCTCGTAAGGTGCCGAACGGGTCATCATAGAATCCCGTCCGATCCCTAGTCGGCATAGTTTATGGTTAAGACTACGACGGTATCTGATCGTCTTCGATCCCCTAACTTTCGTTCCCTGATTAATGAAAACATCCTTGGCGAATGCTTTCGCAGTAGTTAGTCTTCAGCAAATCCAAGAATTTCACCTCTGAC…	AY526485	417	4.46607e-176	0.94	1	476	0	0	1	0	0	1	0	0	0	0	0	0	0	0	5	0	0	0	0	28	0	0	0	0	0	0	1	0
S1196_0802	Chytridiomycota	Chytridiomycetes	CCCCGTGTTGAGTCAAATTAAGCCGCAGGCTCCACTCCTGGTGGTGCCCTTCCGTCAATTCCTTTAAGTTTCAGCCTTGCGACCATACTCCCCCCGGAACCCAAAAACTTTGATTTCTCATAAGGTGCCGAGCGAGTCAAATAATAAACATCGCCCGATCCCTAGTCGGCATAGTTTATGGTTAAGACTACGACGGTATCTGATCATCTTCGATTCCCTAACTTTCGTTCTTGATTAATGAAAACATCCTTGGCAAATGCTTTCGCAGTAGTTAGTCTTTAATAAATCCAAGAATTTCACCTCTGACAATTAAATACTAATGCCCCCAACTATCCCTATTAATCATTACTCCGGTCCTAGAAACCAACAAAATAGAACCAAAG	DQ643792	361	2.24323e-151	0.97	1	383	339	191	7	11	3	34	29	0	0	11	274	239	20	36	9	13	27	178	191	0	22	1	9	73	3	7	41	7
S1196_0805	Chytridiomycota	Chytridiomycetes	CCCCGTGTTGAGTCAAATTAAGCCGCAGGCTCCACTCCTGGTGGTGCCCTTCCGTCAATTCCTTTAAGTTTCAGCCTTGCGACCATACTCCCCCCGGAACCCAAAGACTTGTGATTTCTCAGTAAGGTGCCGATGGAGTCATGAAAGTAACATCCACCGATCCCTAGTCGGCATAGTTTATGGTTAAGACTACGACGGTATCTGATCATCTTCGATCCCCTAACCTTCGTTCTTGATTAATGAAAACATCCTTGTGGAATGCTTTCGCAGAAGTTAGTCTTTCATAAATCCAAGAATTTCACCTCTGACAATTAAATACTAACCACCCCAACTATCCCTATTAATCATTACTTCGGTCCTAGAAGCCAACAAAATAGTACCAAAG	JN020240	341	1.63342e-142	0.94	1	385	13	40	7	6	6	0	22	5	0	3	89	11	1	85	42	42	26	93	37	7	37	9	13	6	3	19	9	0
S1196_0806	Ascomycota	Eurotiomycetes	CCCCGTGTTGAGTCAAATTAAGCCGCAGGCTCCACGCCTTGTGGTGCCCTTCCGTCAATTTCTTTAAGTTTCAGCCTTGCGACCATACTCCCCCCCGAGCCCAAAAACTTTGATTTCTCACAAGGTGCTGAATGGGGCAAAAATCACCACCATCCAATCCCTAGTCGGCATAGTTTATGGTTAAGACTACGACGGTATCTGATCGTCTTCGATCCCCTAACTTTCGTTCACTGATTAATGAAAACATCCTTGACGAATGCTTTCGCAGTAGTTAGTCTTCAATAGATCCAAGAATTTCACCTCTGACAATTGAATACTGACGCCCCCGACTATCCCTATTAATCATTACAGCGGTCCTAGAAACCAACAAAATAGAATCGCGGTCCTATTTCATTATTC…	FJ358295	372	3.20653e-156	0.96	1	405	13	0	1	0	0	0	0	0	0	0	9	0	0	0	6	3	0	0	0	0	0	7	0	44	0	23	0	0
S1196_0807	Cryptomycota	Cryptomycota	CCCCGTGTTGAGTCAAATTAAGCCGCAGGCTCCACTCCTGGTGGTGCCCTTCCGTCAATTCCTTTAAGTTTCAGCCTTGCGACCATACTCCCCCCAGAACCCAAAAACTTTGATTTCTCATAAGGTGCTGATGGTGTCATTAAAATAACATCCACCAATCCCTAGTCGGCATAGTTTATGGTTAAGACTACGACGGTATCTGATCGTCTTTGATCCCCTAACTTTCGTTCTTGATTAATGAAAACATCCTTGGCAAATGCTTTCGCATTAGTTTGTCTTCTGAAAATCCAAGAATTTCACCTCTAGCTTCAGAATACAAATGCCCCCAACTATCCCTATTAATCATTACTTTGGTCCTTTAACCAACAAAGTAGAACCAAAG	FJ687268	328	9.28777e-137	0.93	2	382	0	1	0	0	4	0	0	0	0	0	0	0	0	1	0	1	0	0	0	0	2	12	2	0	0	0	0	0
S1196_0808	Chytridiomycota	Fungi_other	CCCCGTGTTGAGTCAAATTAAGCCGCAGGCTCCATTCCTGGTGGTGCCCTTCCGTCAATTCCTTTAAGTTTCAGCCTTGCGACCATACTCCCCCCGGAACCCAAAAACTTTGATTTCTCAAAAGGTGCCGAACAAGTCACTTAAAATAACATGTTCGTCCCTAGTCGGCATAGTTTATGGTTAAGACTACGACGGTATCTGATCCTCTTCGATCCCCTAACTTTCGTTCTTGATTAATGAAAACATCCTTGGCAAATGCTTTCGCAGTAGTTAGTCTTCAGCAAATCCAACAATTTCACCTCTGACTGCCGAATACTAATGCCCCCAACTGTCCCTATTAATCATTACTTCATTTCTCAAACCAACAAAATAGAAACAAAG	AY987439	322	4.21188e-134	0.92	1	381	0	0	0	0	0	0	0	0	0	0	0	0	3	0	0	0	0	0	0	0	0	0	0	0	0	0	0	0
S1196_0809	Chytridiomycota	Chytridiomycetes	CCCCGTGTTGAGTCAAATTAAGCCGCAGGCTCCACTCCTGGTGGTGCCCTTCCGTCAATTCCTTTAAGTTTCAGCCTTGCGACCATACTCCCCCCGGAACCTAAAAACTTTGATTTCTCATAAGGTGCTGAATGAATCGTAAAAATATTACATCCAATCCCTAGTCGGCATAGTTTATGGTTAAGACTACGACGGTATCTGATCGTCTTCGATCCCCTAACTTTCGTTCTTGATTAATGAAAACATCCTTGGCAAATGCTTTCGCAGAAGTTAGTCTTTAGCCAGTCCAAGAATTTCACCTCTGACGGCTAAATACTAATGCCCCCAACTATCCCTATTAATCATTACTTCGGTCTTGGAAACCAACAAAATAAAACCAAAGTCCTATTTTATTATTCC…	DQ643792	356	3.92394e-149	0.94	1	405	0	0	0	0	0	0	0	0	0	0	0	0	0	7	0	0	0	0	0	0	8	10	0	0	0	1	0	0
S1196_0810	Basidiomycota	Agaricomycetes	CCCTGTGTTGAGTCAAATTAAGCTGCAGGCTCCACTCCTGGTGGTGCCCTTCCGTCAATTCCTTTAAGTTTCAGCCTTGTGACCATACTCCCCCCAGAACCCAAAGACTTTGATTTCTCGTAAGGTGCTGAACGATGCATAATATTGAGGTTGTCCAATCCCTAGTCGGCATAGTTTACTGTTAAGACTACAACAGTATCTGATCATTTTTGATCCCCTAACCTTTGTTCTTGATTAATGAAAACATCCTTGGCAAATGCTTTCGCAATAGTTTGTCTTGCGTAAATCCAAGAATTTCACCTCTAGCAACACAATACAAATGCCCCCAACTATCCCTATTAATTATTATGGCAACTCTAGAAACCAACAAAATAGAACCACACG	U59093	348	1.29101e-145	0.95	1	384	0	0	0	0	0	0	1	0	0	0	0	0	0	0	0	0	0	0	0	5	0	0	0	0	0	1	0	0
S1196_0811	Mucoromycota	Fungi_other	CCCCGTGTTGAGTCAAATTAAGCCGCAGGCTCCACTCCTGGTGGTGCCCTTCCGTCAATTCCTTTAAGTTTCAGCCTTGCGATCATACTCCCCCCGGAACCCAAAAACTTGGATTTCTCTGAAATGCTGAATGGGTCAATTAAAAATATAACACCATCCAATCTTTAGTCGGCATAGTTTATGGTTAAGACTACGACGGTATCTGATCGTCTTCGATCCCCTAACTTTCGTTCTTGATTAATGAAAACATCCTTGACAAATGCTTTCGCAGAAGTTAGTCTTCAATGAATCCAAGAATTTCACCTCTGACCATTGAATACTAATGTCCCCAACTGTTCCTATTTTATTATTCCATG	EU169420	290	5.82808e-120	0.91	1	355	3	0	0	0	0	0	0	0	0	0	0	0	0	0	0	0	0	0	0	0	0	0	0	0	0	0	0	0
S1196_0812	Blastocladiomycota	Blastocladiomycetes	CCCCGTGTTGAGTCAAATTAAGCCGCAAGCTCCACTCCTGGTGGTGCCCTTCCGTCAATTCCTTTAAGTTTCAGCCTTGCGACCATACTCCCCCCAGAACCCAAAAACTTTAATTTCTCAAAAGGTGCCGGATGTGTCTTTTAAAAAACTACAGACATCCGATCCCTAGTCGGCATCGTTTATGGTTAAGACTACGAGTGTGTCTAATGCTCTTTGATACCTTAACTTTCGTTCTTGATTAATGAAAACATCCTTGGCAAATGCTTTCGCAGAAGTTAGTCTTTCCTAAATCCAAGAATTTCACCTCTGACAATTAAATACTAATGCCCCCAACTATCCCTATTAATCATTACTCTAGTCCTAGAAACCAACAAAATAGAACCAAAG	AY821992	351	6.10793e-147	0.95	1	387	0	0	0	0	0	0	0	0	0	0	0	56	0	0	0	0	0	0	0	0	0	0	0	0	0	0	0	0
S1196_0813	Ascomycota	Fungi_other	CCCCGTGTTGAGTCAAATTAAGCCGCAGGCTCCACGCCTATACGTAATATGTTAGCAAAATGGTTAATGAAATTAGAGCGGGTGGTTAACGAACCTGGTGGTGCCCTTCCGTCAATTTCTTTAAGTTTCAGCCTTGCGACCATACTCCCCCCAGAACCCAAACACTTTGATTTCTCGTAAGGTGCCGAAGGAGTCAAAATAGTAACATCCTCCGATCCCTAGTCGGCATAGTTTATGGTTAAGACTACGACGGTATCTGATCGTCTTCGATCCCCTAACTTTCGTTCACTGATTAATGAAAACATCCTTGGCAAATGCTTTCGCAGTAGTTTGTCTTCAATAAATCCAAGAATTTCACCTCTGACAATTGAATACAGATGCCCCCGACTATCCCTATTA…	JQ301649	362	9.49413e-152	0.92	1	442	0	0	0	0	0	0	0	0	0	0	0	0	0	2	0	0	0	0	0	0	0	0	0	0	0	0	0	0
S1196_0815	Mucoromycota	Fungi_other	TCCCGTGTTGAGTCAAATTAAGCCGCAGGCTCCACTCCTGGTGGTGCCCTTCCGTCAATTCCTTTAAGTTTCGATCTTGCGACTATACTCCCCCCAGAACCCAAAAACTTTGATTTCTCATAAGGTGCCAATAGACCCATAAAAAGGTACTACTGATCCCTAGTCGGCATAGTTTATGGTTAAGACTACGACGGTATCTAATCGTCTTCGATCCCCTAACTTTCTTTCTTGATTAATGAAAACATCCTTGGCAAATGCTTTCGCAGTTGTTAGCCTTGAGAAAATCCAAGAATTTCACCTCTAGCTTCTCAATACTAATGCCCCCAACTATCCCTATTAATCATTACCTCGGTTCTAGAAACCAACAAAATAGAACCAAAGTCCTATTTTATTATTCCA…	AY360747	333	6.04002e-139	0.91	2	404	0	0	0	0	0	0	0	0	0	0	0	0	0	0	2	0	0	0	0	0	0	0	0	0	0	0	0	0
S1196_0816	Chytridiomycota	Chytridiomycetes	TCCCGTGTTGAGTCAAATTAAGCCGCAGACTCCACTCCTGGTTGTGCCCTTCCGTCAATTCCTTTAAGTTTCAGCCTTGCGACCATACTCCCCCCGGAACCCAAAAACTTTGATTTCTCTGAAGATGCCAAACAAGTCATTAAAAAAATTGAACATTGTCTGATCTCTAGTCGGCATGGTTTATGGTTAAGACTACGACGGTATCTGATCGTCTTCGATCCCCTAACTTTCGTTCCTGATTAATGAAAACATCCTTGGCAAATGCTTTCGCAGTAGTTTGTCTTTCTGAAATCCAAGAATTTCACCTCTGACTCAGAAATACAAATGCCCCCAACTATCCCTATTAATCATTACTTTGGTCCTAGAAACCAACAAAATAGAACCAAAGTCCTATTCTAT…	DQ643792	347	3.87137e-145	0.93	2	411	0	5	0	0	11	0	0	0	0	0	0	0	0	0	0	0	0	0	0	0	0	0	0	0	0	0	0	0
S1196_0818	Basidiomycota	Fungi_other	CCCCATGTTGAGTCAAATTAAGCTGCAGGCTCCATATCTGGTGGTGCCCTTCTGTCAATTCCTTTAAGTTTCAGCCTTGCGACCATACTCCCTCCAGAACCCAAAGACTTTGATTTCTCATAAGGTGCCGAGTGACGCATAATAATTGAGGTCACCTGATCCCTGGTTGGCATAGTTTACTATTAAGACTATAACAGTATCTAATCATTTTCGATCCCCTAACCTTTGTTCTTGATTAATGAAAACATCCTTGGCAAATGCTTTTGCAATAGTTGGTCTTGAGTCAATCCAAGAATTTCACCTCTAGCGACTCAATACCAATGCCCCCAACTATCCCTATTAATCATTATGGCGACTCTAGAAACCAACAAAATAGAACTGCATG	DQ457623	343	2.12391e-143	0.94	1	383	0	0	0	0	0	0	9	0	0	0	0	0	0	0	0	0	0	0	0	0	0	0	0	0	0	0	0	0
S1196_0819	Entomophthoromycota	Entomophthoromycetes	CCCCGTGTTGAGTCAAATTAAGCCGCAGGCTCCACTCCTGGTGGTGCCCTTCCGTCAATTCCTTTAAGTTTCAGCCTTGCGACCATACTCCCCCCGGAACCCAAAAACTTTGATTTCTCATAAGGTGCTGATAAAGTCATAAAAATAACTGTTACCAATCCCTAGTCGGCATAGTTTATGGTTAAGACTACGACGGTATCTGATCGTCTTCGATCCCCTAACTTTCGTTCTTGATTAATGAAAACATCCTTGGCAAATGCTTTCGCAGAAGTTAATCTTTCATAAATCCAAGAATTTCACCTCTGACAATTAAATATTAATGCCCCCAACTGTCCCTATTAATCATTACTTTGGTCCTATAAACCAACAAAATAGAACCAACG	AF368505	351	6.035e-147	0.96	1	381	1	0	0	0	0	0	0	0	0	0	0	0	0	0	0	0	0	0	14	2	0	5	0	0	0	0	0	0
S1196_0821	Ascomycota	Sordariomycetes	CCCCGTGTTGAGTCAAATTAAGCCGCAGGCTCCACTCCTGGTGGTGCCCTTCCGTCAATTTCTTTAAGTTTCAGCCTTGCGACCATACTCCCCCCGGAACCCAAGAACTTTGATTTCTCGTAAGGTGCCGAACGGGTCAAGTAATAACACCGTCCGATCCCTAGGTGGCATAGTTTATGGTTAAGACTACGACGGTATCTGATCGTCTTCGATCCCCTAACTTTCGTTCCTGATTAATGAAAACATCCTTGGCAAATGCTTTCGCAGTAGTTAGTCTTCAATAAATCCAAGAATTTCACCTCTGACAATTGAATACTGATGCCCCCGACTGTCCCTATTAATCATTACGGCGGTCCTAGAAACCAACAAAATAGAACCACGCG	AF279399	365	3.79273e-153	0.97	1	383	2	0	0	0	0	0	0	0	0	0	0	0	0	0	0	0	7	0	4	0	0	0	1	0	0	0	3	0
S1196_0823	Basidiomycota	Agaricomycetes	CCCTGTGTTGAGTCAAATTAAGCCACAGGCTCCACTCCTGGTGGTGCCCTTCCATCAATTCCTTTAAGTTTCAGCCTTGCAACCATACTCCCCCCAGAACCCAAAGACTTTGATTTCTCGTAAGGTGCTGAGTGACACATGAAATTGAGGTCGCCCAATCCCTAGTCGGCATAGTTTACTGTTAAGACTACAATCGTATCTGATTGTTTTTGATCCCCTAACCTTCATTCTTGATTAATGAAAACATCCTTGGCAAATGCTTTCGCAATAGTTAGTCTTCAGTAAATCCAAGAATTTCACCTCTAGCAACTGAATACTAATGCCCCCAACTATCCCTATTAATCATTACGGCGACTCTAGAAACCAACAAAATAGAACCGCACG	U59097	356	3.6905e-149	0.96	1	384	0	0	0	0	0	0	0	0	0	0	0	0	0	0	0	5	0	0	0	0	0	0	0	0	0	0	0	0
S1196_0829	Cryptomycota	Cryptomycota	TCCCGTGTTGAGTCAAATTAAGCCGCAGGCTCCACTCCTGGTGGTGCCCTTCCGTCAATTCCTTTAAGTTTCAGCCTTGCGACCATACTCCCCCCAGAACCCAAAAACTTTGATTTCTCATAAGGTGCCGATGGAGTCGCGAGCGACATCCACCGATCCCTAGTCGGCATAGTTTATGGTTAAGACTACGACGGTATCTAATCGTCCTCGATCCCCTAACTTTCGTTCTTGATCAATGAAAACATCCTTGGCAAATGCTTTCGCACTAGTTAGTCTTTGGTAAATCCAAGAATTTCACCTCTGACTACCGAATACTAATGCCCCCAACTGTCCCTATTAATCATTACCTTGGTCTTCAAACCAACAAAATAAGGCCAAAGTCCTATTTCATTATTCCAT…	AF372713	356	3.9017e-149	0.94	1	401	2	1	0	0	0	0	0	0	0	0	19	8	0	60	28	8	0	0	18	2	12	8	9	42	5	2	0	0
S1196_0831	Basidiomycota	Agaricomycetes	CCCCCTGTTGAGTCAAATTAAGCCGCAGGCTCCACTCCTGGTGGTGCCCTTCCGTCAATTCCTTTAAGTTTCAGCCTTGCGACCATACTCCCCCCAGAACCCAAAGACTTTGATTTCTCGTAAGGTGCCGAACGACGCATAAAATTGAGGTCGTCCGATCCCTAGTCGGCATAGTTTACTGTTAAGACTACAACGGTATCTGATCGTTTTCGATCCCCTAACCTTCGTTCTTGATTAATGAAAACATCCTTGGCAAATGCTTTCGCAATAGTTTGTCTTGCGTAAATCCAAGAATTTCACCTCTAGCAACGCAATACAAATGCCCCCAACTATCCCTATTAATCATTACGGCGACTCTAGAAACCAACAAAATAGAACCGCACGTCCTATTCCATTATT…	DQ457626	398	9.76731e-168	0.99	1	406	11	13	11	50	10	8	20	9	0	24	14	14	9	0	9	8	1	1	1	17	3	36	0	0	5	27	4	11
S1196_0832	Entomophthoromycota	Entomophthoromycetes	TCCCGTGTTGAGTCAAATTAAGCCGCAGGCTCCACTCCTGGTGGTGCCCTTCCGTCAATTCCTTTAAGTTTCAGCCTTGCGACCATACTCCCCCCGGAACCCAAAAACTTTGATTTCTCATAAGGTGCCGATGAAGTCAGTAGGTGACTTTCACCGATCCCTAGTCGGCATAGTTTATGGTTAAGACTACGACGGTATCTAATCGTCTTCGATCCCCTAACTTTCGTTCTTGATTAATGAAAACATCCTTGGCAAATGCTTTCGCAGTTGTTAGCCTTGAACAAATCCAAGAATTTCACCTCTGACAGTTCAATACTAATGCCCCCAACTATCCCTATTAATCATTACTTTGGTCCTAGAAACCAACAAAATAGAACCAAAG	AF368505	341	1.6187e-142	0.94	2	382	0	0	0	0	0	0	0	0	0	0	0	0	0	0	0	0	0	0	0	0	0	15	0	0	0	0	0	0
S1196_0833	Glomeromycota	Glomeromycetes	CCCCGTGTTGAGTCAAATTAAGCCGCAGGCTCCACCCCTGGTGGTGCCCTTCCGTCAATTCCTTTAAGTTTCAGTCTTGCGATTATACTCCCTCCAGAACCCAAACACTTTGGTTTCCCGTAAGGCGCCGAATGAGTCATTAAAAATAACATCATCCGATCCCTAGTCGGCATAGTTTATGGTTAAGACTACGACGGTATCTGATCGTCTTCGATCCCCTAACTTTCGTTCTTGATTAATGAAAACATCCTTGGCAAATGCTTTCGCAGTAGTTAGTCTTCAATAAATCCAAGAATTTCACCTCTGACAATTGAATACTAATGCCCCCAACTATCCCTATTAATCATTACGTCGATCCTAGAAACCAACAAAATAGGATTAACG	EU169391	367	4.94654e-154	0.98	1	379	1	4	0	0	1	0	0	0	0	0	0	0	0	0	0	0	2	0	0	0	0	2	0	0	0	0	0	0
S1196_0834	Mucoromycota	Fungi_other	CCCCGTGTTGAGTCAAATTAAGCCGCAGGCTCCACTCCTGGTGGTGCCCTTCCGTCAATTCCTTTAAGTTTCGGCCTTGCGACTATACTCCCCCCGGAACCCAAACACTTTGATTTCTCGCAAGGTGCCAGGCGCGTCATTATTCAACATCGCCTGATCCCTAGTCGGCATCGTTTATGGTCAAGACTACGACGGTATCTAATCGTCTTCGATCCCCTAACTTTCGTTCTTGATCAATGAAAACATCCTTGGCAAATGCTTTCGCATACGTTCGTCTTTCGCAAATCCAAGAATTTCACCTCTAGCTGCGAAATACGAATGCCCCCAACTGTCCCTGTTCATCATTACCGCGGTTCCAAGAAACCAACGCAACAGAACCACCGG	AY360747	306	5.2012e-127	0.9	1	379	0	0	0	0	0	0	13	0	0	0	0	0	0	0	0	0	0	0	0	0	0	0	0	0	0	0	0	0
S1196_0836	Basidiomycota	Cystobasidiomycetes	CCCCGTGTTGAGTCAAATTAAGCCGCAGGCTCCACACCATGGTGGTGCCCTTCCGTCAATTCCTTTAAGTTTCAGCCTTGCGACCATACTCCCCCCCGAACCTAGACTTAAAGATTTCTCTTCAGGTGCCGAACGAGTCATAAAAGAATCTCGTCCGATCCCTAGTCGGCATCGTTTACTGTTAAGACTACAACGGTATCTGATCGTTTTCGATCCCCTAACCTTCGTTCTTGATCAATGAAAACATCCTTGGCAAATGCTTTCGCGGTAGTTCGTCTTCAATAAATCCAAGAATTTCACCTCTAGCAATTGAATACGAATGCCCCCAACTATCCCTATTAATCATTACGGCGATCCTAGAAACCAACAAAATAGAACCGCACG	DQ631899	376	5.09892e-158	0.98	1	384	16	12	15	44	35	8	2	27	0	36	16	1	4	1	0	2	12	0	4	1	0	14	4	8	14	30	0	16
S1196_0837	Ascomycota	Orbiliomycetes	TCCCGTGTTGAGTCAAATTAAGCCGCAGGCTCCACATCTGGTGGTGCCCTTCCGTCAATTCCTTTAAGTTTCAGCCTTGCGACCATACTCCCCCCAGAACCCAAAAACTTTGATTTCTCGTAAGGTGCCGAGCGGGTCATAAGTAGAGCACCGCCCGATCCCTAGTCGGCATAGTTTATGGTTAAGACTACGACGGTATCTGATCGTCTTCGATCCCCTAACTTTCGTTCACTGATTAATGAAAACATCCTTGGCAAATGCTTTCGCAGTAGTTAGTCTTCAATAAATCCAAGAATTTCACCTCTGACAATTGAATACTGATGCCCCCGACTATCCCTATTAATCATTACGGTGGCTCTAGAAACCAACAAAATAGAACCGCCGTCCTATTCTATTATT…	AJ001985	402	1.65607e-169	0.99	2	407	8	89	28	86	111	84	207	10	0	46	25	64	86	8	3	17	24	0	0	0	17	11	1	16	1	8	6	20
S1196_0839	Ascomycota	Leotiomycetes	CCCCGTAGGGGCTGCTTTCAGGAGCAGAGCTGCGGCTAAGCTGCTATATTAACTCCTGGTGGTGCCCTTCCGTCAATTTCTTTAAGTTTCAGCCTTGCGACCATACTCCCCCCAGAACCCAAAGACTTTGATTTCTCGTAAGGTGCCGAGCGAGTCAAAAAGATAACATCGCCCGATCCCTAGTCGGCATAGTTTATGGTTAAGACTACGACGGTATCTGATCGTCTTCGATCCCCTAACTTTCGTTCACTGATTAATGAAAACATCCTTGGCAAATGCTTTCGCAGTAGTTAGTCTTCAATAAATCCAAGAATTTCACCTCTGACAATTGAATACTGATGCCCCCGACTATCCCTATTAATCATTACGGCGGTCCTAGAAACCAACAAAATAGAACCA…	AY789340	368	1.88577e-154	0.96	2	403	0	0	0	0	0	0	0	0	0	0	0	0	0	2	0	0	0	0	0	0	0	0	0	0	0	0	0	0
S1196_0840	Chytridiomycota	Chytridiomycetes	TCCCGTGTTGAGTCAAATTAAGCCGCAGGCTCCAATCCTGGTGGTGCCCTTCCGTCAATTCCTTTAAGTTTCAGCCTTGCGACCATACACCCCCCAGAACCCGAAAACTTTGATTTCTCCTAAGGTGCCGATGGGGTTTGGTAACACCCACCGATCCCTAGTCGGCATAGTTTATGGTTAGGACTACGACGGTATCTGATCGTCTTCGATCCCCTAACTTTCGTTCTTGATTAATGAAAACATCCTTGGCAAATGCTTTCGCAGAAGTTAGTCTTTCATAAATCCAAGAATTTCACCTCTGACAATTAAATACTAATGCCCCCAACTATCCCTATTAATCATTACTTCGGTCCCGGAAACCAACAAAATAGAACCAAAG	DQ536473	339	1.23356e-141	0.94	2	379	0	0	1	1	0	0	0	0	0	1	0	20	3	1	0	0	0	0	0	2	1	1	0	2	0	1	0	0
S1196_0841		Fungi_other	CCCCGTGTTGAGTCAAATTAAGCCGCATAATCCACTCCTGGTGGTGCCCTTCCGTCAATTCCTTCAAGTTTCAGCCTTGCGACCATACTCCCCCCAGAACCCAAAGACTTTGATTTCTCAAAAGGTGCCGGATGTGTCTTTTTACAAGTAAAAAACTACAATGCATCCGATCCCTGGTCGGCATCGTTTACGGCTAAGACTACCTCGGTATCTGATCGAGTTTGTTCCCTTAGCTTTCCATCTTGATCAATGAAAACATCCTTGGCAAATGCTTTCGCACAAGTTCGTCTTTTCTAAATCCAAGAATTTCACCTCTGACTATTCAATACGAATGCCCCCAACTGTCCCTATTAATCATTACCCGTTTCCCAGAAACCAACAAAATAGAAAACAAGTCCT…	AY821992	316	2.13129e-131	0.88	1	418	0	0	18	0	0	0	0	0	0	0	0	0	0	0	0	0	0	0	0	0	0	0	0	0	0	0	0	0
S1196_0843	Ascomycota	Eurotiomycetes	CCCCGTGTTGAGTCAAATTAAGCCGCAGGCTCCACGCCTGGTGGTGCCCTTCCGTCAATTTCTTTAAGTTTCAGCCTTGCGACCATACTCCCCCCAGAACCCAAACACTTTGATTTCTCGCAAGGTGCCGAGCGAGTCATAATATGAACGCCGCCCGATCCCTAGTCGGCATAGTTTACGGTATAGGACTACGACGGTATCTGATCGTCTTCGATCCCCTAACTTTCGTTCGCTGATTAATGAAAACATCTTTGGCAAATGCTTTCGCAGTGGTTAGTCTTCGGCAAATCCAAGAATTTCACCTCTGACAGCCGAATACTGATGCCCCCAACCATCCCTGTTAATCATTACGGCGGTCCTAGAAACCAACAAAATAGGATCGCACGTCCTATTCCATTA…	FJ358349	367	5.31902e-154	0.95	1	409	0	0	0	1	0	0	0	0	0	0	0	0	0	0	2	10	0	0	0	10	0	18	1	1	3	8	0	0
S1196_0845	Ascomycota	Sordariomycetes	CCCCGTGTTGAGTCAAATTAAGCCGCAGGCTCCACCCCTGGTGGTGCCCTTCCGTCAATTTCTTTAAGTTTCAGCGTTGCCACCATACTTCCCCAGGAACCCACAGACTTTGATTTCTCGTAAGGTGCCGAACGAGTCAAAAAGTAACATCGTCCGATCCCTAGTCGGCATAGTTTATGGTTAAGACTACGACGGTATCTGATCGTCTTCGATCCCCTAACTTTCGTTCCTGATTAATGAAAACATCCTTGGCAAATGCTTTCGCAGTAGTTAGTCTTCAATAAATCCAAGAATTTCACCTCTGACAATTGAATACTGATGCCCCCGACTGTCCCTATTAATCATTACGGCGGTCCCATAACCAACAAAATAGAACCACACG	GU256632	378	6.59011e-159	0.99	1	382	0	0	2	0	12	0	0	1	0	18	0	68	74	1	0	0	0	0	0	0	0	7	0	0	0	0	0	0
S1196_0847	Zoopagomycota	Zoopagomycetes	CCCCGTGTTGAGTCAAATTAAGCCGCAGGCTCCACTCCTGGTGGTGCCCTTCCGTCAATTCCTTTAAGTTTCAGCCTTGCGACCATACTCCCCCCGGAACCCAAACACTTTGATTTCTCGCGAGGTGCCGCGCGGGTCGTAATCAACACCGCGCGATCCCTAGTCGGCATCGTTTACAGTCGAGACTACGACGGTATCTAATCGTCTTCGATCCCCCAACTTTCGTTCTTGATTAATGAGAACATCCTTGGCAGATGCTTTCGCAAAAGTTCGTCGTTCATAAATCCAAGAATTTCACCTCTAGCAATGAAATACGAGTGCCCCCAACTGTCCCTGTTGATCATTACCGTGGTCCTGAGAACCAGCAAAACAAGACCAAGG	DQ643781	297	5.00017e-123	0.89	1	381	0	0	1	1	5	3	0	0	0	0	3	0	15	1	0	0	0	0	0	0	0	4	0	0	0	0	0	2
S1196_0848	Ascomycota	Sordariomycetes	TCCCGTGTTGAGTCAAATTAAGCCGCAGGCTCCACCCCTGGTGGTGCCCTTCCGTCAATTTCTTTAAGTTTCAGCCTTGCGACCATACTCCCCCTGGAGCCCAAGCACTTTGATTTCTCGAAAGGTGCCGAACGAGTCATCAAATAACATCGTCCGATCCCTAGTTGGCATAGTTTATAGTTGAGACTACGACGGTATCTGATCGTCTTCGATCCCCCAACTTTCGTTCCTTATCAATGAAAACATCCTTGGCAAATGCTTTCGCAGTAGTTCGTCTTCAGAGAATCTGAGAATTTCACCTCTAGCCACTGAATACGGATGCCCCCGACTGTCCCTATTAATCATTACGGCGGTCCTAGAAACCAACGAAATAGAACCACACG	AY858659	343	2.11115e-143	0.95	2	383	0	0	0	5	24	7	7	0	0	0	0	2	101	0	0	0	0	0	0	0	0	0	0	0	0	0	0	0
S1196_0849	Cryptomycota	Fungi_other	TCCCGTGTTGAGTCAAATTAAGCCGCAGGCTCCACTCCTGGTGGTGCCCTTCCGTCAATTCCTTTAAGTTTCAGCCTTGCGACCATACTCCCCCCAGAACCCAAAAACTTTGATTTCTCGTAAGGTGCTGATGGCGTCATAAAAACATCCACCAATCCCTAGTCGGCATAGTTTATGGTTAAGACTACGACGGTATCTAATCGTCTTCGATCCCCTAACTTTCGTTCTTGATTAATGAAAACATCCTTGACAGATGCTTTCGCACTAGTTTGTCTTCAGGGAATCCAAGAATTTCACCTCTGACCCCGGAATACAAATGTCCCCAACTATCCCTATTAATCATTACTTTGGCCCTTCAACCAACAAAATAGAACCAAAGTCCTATTCCATTATTCCATG…	AF372713	340	4.76103e-142	0.92	1	400	0	0	0	0	1	0	9	0	0	0	3	7	1	0	0	0	0	0	0	0	1	5	0	3	0	5	0	0
S1196_0851	Ascomycota	Orbiliomycetes	CCCCGTGTTGAGTCAAATTAAGCCGCAGGCTCCACTCCTAAAGCACCGAGTTAGTATTAACGTTGCAGGAAAAACGACGGGAAAATTAAGAAGGGGAAAGGGAGGGGGGGAAATAAACGTACCTGGTGGTGCCCTTCCGTCAATTCCTTTAAGTTTCAGCCTTGCGACCATACTCCCCCCAGAACCCAAAGACTTTGATTTCTCGTAAGGTGCCGAGCGGGTCATAAATTAAACACCGCCCGATCCCTAGTCGGCATAGTTTATGGTTAAGACTACGACGGTATCTGATCGTCTTCGATCCCCTAACTTTCGTTCACTGATTAATGAAAACATCCTTGGCAAATGCTTTCGCAGTAGTTAGTCTTCAATAAATCCAAGAATTTCACCTCTGACAATTGA…	AY970524	346	1.24247e-144	0.99	122	469	0	51	0	0	0	0	0	0	0	0	0	0	0	0	0	0	0	0	0	0	0	0	0	0	0	0	23	0
S1196_0854	Mucoromycota	Mucoromycetes	CCCCGTGTTGAGTCAAATTAAGCCGCAGGCTCCACTCCTGGTGGTGCCCTTCCGTCAATTCCTTTAAGTTTCAGCCTTGCGTCCCATACTCCCCCCAGAACCCAAAAACTTTACTTTCGCTAAGCTGCTGAATCCTGCCAGTGGCGAGGATCCAATCGCTAGTCGGCATAGTTTGTGGTTAAGACTACGACGGTATCTAATCGTCTTCGATCCCTCAACTTTAGTCCCTGATCAATGGAAACGTCCTAGGTCAAATGCTTTCGCAGTTGTTTGTCTTCGGTCAATCCAAGAATTTCACCTCTAGCGACCAAATACAAATGCCCCCAACCGTTCCTATTCATCATTTCCCAAGGTCAAGTATACCAACAAAACAAGACTAGGG	EU736286	354	2.82112e-148	0.98	21	382	5	0	6	7	1518	50	125	0	0	1	0	0	14	0	175	0	0	0	0	0	3	3	20	0	0	4	0	1
S1196_0856	Ascomycota	Leotiomycetes	CCCCGTGTTGAGTCAAATTAAGCCGCAGGCTCCACTCCTGGTGGTGCCCTTCCGTCAATTCCTTTAAGTTTCAGCCTTGCGACCATACTCCCCCCAGAACCCAAAGACTTTGGTTTCCCGTAAGGTGCCGAGCGAGTCAAAAGGAGAACATCGCCCGATCCCTAGTCGGTAAAGTTTATGGTTAAGACTACGACGGTATCTGATCGTCTTCGATCCCCTAACTTTCGTTCACTGATTAATGAAAACATCCTTGGCAAATGCTTTCGCAGTAGTTAGTCTTCAATAAATCCAAGAATTTCACCTCTGACAATTGAATACTGATGCCCCCGACTATCCCTATTAATCATTACGGCGGTCCTAGAAACCAACAAAATAGAACCACACG	DQ002903	371	8.38853e-156	0.98	1	385	0	0	0	0	0	0	0	0	0	0	0	0	3	2	0	2	0	0	0	0	0	1	0	0	0	0	0	0
S1196_0857	Basidiomycota	Agaricomycetes	CCCCGTGTTGAGTCAAATTAAGCCGCAGGCTCCACTCCTGGTGGTGCCCTTCCGTCAATTCCTTTAAGTTTCAGCCTTGCGACCATACTCCCCCCAGAACCCAAAGACTTTGATTTCTCGTAAGGTCCCGAGCGACACATTACATTGTGGTCGCCCGATCCCTAGTCGGCATCGTTTACTGTTAAGACTACAACGGTATCTGATCGTTTTCGATCCCCTAACCTTCGTTCTTGATTAATGAAAACATCCTTGGCAAATGCTTTCGCGGTAGTTAGTCTTCAGTAAATCCAAGAATTTCACCTCTAGCAACTGAATACTAATGCCCCCAACTATCCCTATTAATCATTACGGCGGCTCTAGAAACCAACAAAATAGAACCGCACGTCCTATTTCATTATT…	DQ834910	393	1.60658e-165	0.98	1	407	0	91	1	2	2	0	0	0	0	6	2	0	1	26	3	4	1	0	1	0	0	17	0	9	0	0	9	0
S1196_0858	Basidiomycota	Agaricomycetes	CCCTGTGTTGAGTCAAATTAAGCCGCAGCAGGCTCCACATCTGGTGGTGCCCTTCCGTCAATTCCTTTAAGTTTCAGCCTTGCGACCATACTCTCCCCAGAACCCAAAGACTTTGATTTCTCGCAAGGTGCTGAGCAACACATCATAATTGAGGTTGCCCAATCCCTAGTCGGCATAGTTTACTGTTAAGACTACAACGGTATCTGATCATTTTCAATCCCCTAACCTTCATTCTTGATTAATGAAAACATCCTTGGCAAAGCTTTCGCAATAGTTGGTCTTGAGTCAATCCAAGAATTTCACCTCTAGCAACTCAATACCAATGCCCCCAACTATCCCTATTAATCATTACAGCGACTCTAGAAACCAACAAAATAGAACCACATGTCCTATTCCATT…	DQ435798	369	6.93562e-155	0.95	1	410	0	0	0	0	0	0	0	0	0	0	0	0	0	0	0	0	0	0	60	0	0	0	0	0	0	0	0	0
S1196_0860	Ascomycota	Dothideomycetes	CCCCGTGTTGAGTCAAATTAAGCCGCAGGCTCCACGCCTGGTGGTGCCCTTCCGTCAATTTCTTTAAGTTTCAGCCTTGCGACCATACTCCCCCCAGAACCCAAAAACTTTGATTTCTCGTAAGGTGCCGAAGAGGCCAAAACAATAGCACTCTCCGATCCCTAGTCGGCATAGTTTATGGTTAAGACTACGACGGTATCTGATCGTCTTCGATCCCCTAACTTTCGTTCACTGATTAATGAAAACATCCTTGGCAAATGCTTTCGCAGTAGTTTGTCTTCAATAAATCCAAGAATTTCACCTCTGACAATTGAATACAGATGCCCCCGACTATCCCTATTAATCATTACGGCGGTCCTAGAAACCAACAAAATAGAACCGCGCG	EF053588	365	3.81565e-153	0.97	1	385	0	0	0	0	27	2	4	0	0	0	60	2	10	3	0	4	0	11	0	1	0	0	3	0	0	0	0	0
S1196_0861	Chytridiomycota	Chytridiomycetes	CCCCGTGTTGAGTCAAATTAAGCCGCAGGCTCCACTCCTGGTGGTGCCCTTCCGTCAATTCCTTTAAGTTTCAGCCTTGCGACCATACTCCCCCCGGAACCTAAAAACTTTGATTTCTCTCAAGGTGCCGAACAAGACGTAAAAGAACTTGTCCGATCCCTAGTCGGCATAGTTTATGGTTAAGACTACGACGGTATCTGATCGTCTTCGATCCCCTAACTTTCGTTCTTGATTAATGAAAACATCCTTGGCAAATGCTTTCGCAGAAGTTAGTCTTTAGCCAATCCAAGAATTTCACCTCTGACGGCTAAATACCAATGCCCCCAACTATCCCTATTAATCATTACTTCGGTCTTGAAAACCAACAAAATAAAACCAAAG	DQ536478	349	4.61324e-146	0.95	1	381	0	7	0	0	0	0	0	0	0	0	2	0	0	0	0	0	0	0	0	0	0	1	0	0	0	0	1	0
S1196_0862	Chytridiomycota	Chytridiomycetes	CCCCGTGTTGAGTCAAATTAAGCCGCAGGCTCCACTCCTGGTGGTGCCCTTCCGTCAATTCCTTTAAGTTTCAGCCTTGCGACCATACTCCCCCCGGAACCCAAAAACTTTGATTTCTCGTAAGGTGCTGATGAAGTCATCTTTTAATTAACGTTCACCAATCCCTAGTCGGCATAGTTTATGGTTAAGACTACGACGGTATCTGATCGTCTTCGATCCCCTAACTTTCGTTCTTGATTAATGAAAACATCCTTGACAAATGCTTTCGCAGAAGTTAGTCTTTCCTAAATCCAAGAATTTCACCTCTGACAATTAAATACTAATGTCCCCAACTGTCCCTATTAATCATTACTTTGGTCTTAGAAACCAACAAAATAAGATCAAAG	HQ901766	337	9.68993e-141	0.94	1	386	0	0	0	0	0	0	0	0	0	1	0	0	0	0	0	0	0	28	0	0	0	0	0	0	0	0	0	0
S1196_0863	Basidiomycota	Tremellomycetes	CCCCGTGTTGAGTCAAATTAAGCCGCAGGCTCCACACCTTGTGGTGCCCTTCCGTCAATTCCTTTAAGTTTCAGCCTTGCGACCATACTCCCCCCAGAACCCAAAGACTTTGATTTCTCGTAAGGTGCTGAGCTAGTCAAAAATTAACGTAGCCCAATCCCTAGTCGGCATAGTTTACTGTTAAGACTACAACGGTATCTAATCGTTTTTGATCCCCTAACCTTCGTTCTTGATCAATGAAAACGTCCTTGGCAAATGCTTTCGCAGAAGTTAGTCTTCCGTCAATCTAAGAATTTCACCTCTAGCAACGGAATACTAATGCCCCCGACCGTCCCTATTAATCATTACGGCGATCCTAGAAACCAACAAAATAGGACCGCACG	AF261665	367	4.93164e-154	0.97	1	383	6	1	1	0	4	0	6	0	1	1	2	0	0	0	0	0	0	0	0	0	0	1	0	0	0	0	0	1
S1196_0866	Ascomycota	Sordariomycetes	CCCCGTGTTGAGTCAAATTAAGCCGCAGGCTCCACCCCTGGTGGTGCCCTTCCGTCAATTTCTTTAAGTTTCAGCCTTGCGACCATACTCCCCCCGGAACCCACAAACTTCTACTTTCGTGTAAGGTGCCGAACGCGCTAAAAGGAGCATCGTCCGATCCCTAGTCGGCATAGTTTATGGTTAAGACTACGACGGTATCTGATCGTCTTCGATCCCCTAACTTTCGTTCCTGATTAATGAAAACATCCTTGGCAAATGCTTTCGCAGTAGTTAGTCTTCAATAAATCCAAGAATTTCACCTCTGACAATTGAATACTGATGCCCCCGACTGTCCCTATTAATCATTACGGCGGTCCTAGAAACCAACAAAATAGAACCGCGCG	AY497510	362	8.08897e-152	0.97	1	383	8	8	0	0	85	0	0	0	0	0	0	0	5	0	0	0	0	0	0	0	13	0	0	0	0	3	3	0
S1196_0867	Ascomycota	Fungi_other	CCCCGTGTTGAGTCAAATTAAGCCGCAGGCTCCACTCCTGGTGGTGCCCTTCCGTCAATTTCTTTAAGTTTCAGCCTTGCGACCATACTCCCCCCAGAACAAATTTTGATTTCTCGTAAGGTGCCGATGGAGTCAAAATATAACATCCACCGATCCCTAATCGGCATAGTTTACGGTCAAGACTACGACGGTATCTGATCGTCTTCGATTCCCTGACTTTCGTTCACTGATTAATGAAAACATCCTTGGCAAATGCTTTCGCAGTAGTTAGTCTTCAATAAATCCAAGAATTTCACCTCTGACAATTGAATACTGATGCCCCCGACTATCCCTATTAATCATTACGGCTCTCCTAGAAACCAACAAAATAGGAAAGCCG	GU324001	341	1.60399e-142	0.96	1	373	0	0	0	0	0	0	1	0	0	0	0	0	4	0	0	0	0	0	0	0	0	0	0	0	0	0	0	0
S1196_0868	Ascomycota	Fungi_other	CCCCGTGTTGAGTCAAATTAAGCCGCAGGCTCCACTCCTGGTGGTGCCCTTCCGTCAATTTCTTTAAGTTTCAGCCTTGCGACCATACTCCCCCCGGAACGCAGAAACTAGTACTTTCGCACAGGGTGCCGAATGGGTCAGAGGACACCATCCGATCCCCAGTTCGCATAGTTTACGGTTAAGACTACAACGGTATCTGATCGTTTTTGATCCCCTAACTTTCGTTCCTGATTAATGAAAACACCCTTGGAAGATGCTTTCGCAGTAGTGCGTCTTCAGCCGATCCAAGAATTTCACCTCTGACGGCTGAATACGAATTCCCCCGATTGTCCCTATTAATCATTACGGCGGTCCGCAACCAACAAAATAGAACCGCACG	AY497519	303	1.09258e-125	0.9	2	379	0	0	0	4	2	0	6	0	0	0	0	2	19	12	0	0	0	0	0	0	0	0	0	0	0	0	0	2
S1196_0870	Ascomycota	Sordariomycetes	CCCCGTGTTGAGTCAAATTAAGCCGCAGGCTCCACCCCTGGTGGTGCCCTTCCGTCAATTTCTTTAAGTTTCAGCCTTGCGACCATACTCCCCCCGGAACCCAAAAACTTTACTTTCGTGTAAGGTGCCGAACGAGTCAAAGAATAACATCGTCCGATCCCTAGTCGGCACAGTTTATGGTTAAGACTACGACGGTATCTGATCGTCTTCGATCCCCTAACTTTCGTTCCTGATTAATGAAAACATCCTTGGCAAATGCTTTCGCAGTAGTTAGTCTTCAATAAATCCAAGAATTTCACCTCTGACAATTGAATACTGATGCCCCCGACTGTCCCTATTAATCATTACGGCGGTCCTAGAAACCAACAAAATAGAACCACACGTCCTATTCCATTATTC…	AY526478	395	2.06547e-166	0.99	1	403	39	67	14	63	181	462	145	13	0	7	26	44	75	5	22	6	0	0	1	12	13	12	38	64	25	21	24	6
S1196_0871	Basidiomycota	Agaricomycetes	CCCCGTGTTGAGTCAAATTAAGCCGCAGGCTCCACGCCTGGTGGTGCCCTTCCGTCAATTTCTTTAAGTTTCAGCCTTGCGACCATACTCCCCCCAGAACCCAAAAACTTTGATTTCTCGTAAGGTGCCGAGCAACACATCATGAGAGGTCGCCCGATCCCTAGTCGGCATAGTTTACTGTTAAGACTACAACGGTATCTGATCGTTTTCGATCCCCTAACCTTCGTTCTTGATTAATGAAAACATCCTTGGCAAATGCTTTCGCAATAGTTCATCTTCAGTCAATCCAAGAATTTCACCTCTAGCGACTGAATATGAATGCCCCCAACTATCCCTATTAATCATTACAGCAGCTCTAAAAACCAACAAAGTAGAACTGCACA	DQ444862	361	2.24323e-151	0.97	1	382	0	0	1	1	1	109	1	8	0	0	5	1	5	14	4	1	15	0	0	108	3	4	38	0	5	4	0	0
S1196_0876	Basidiomycota	Agaricomycetes	CCCCGTGTTGAGTCAAATTAAGCCACAGGCTCCACTCCTGGTGGTGCCCTTCTGTCAATTCCTTTAAGTTTCAGCCTTGCAACCATACTCCCCCCAGAACCCAAAGACTTTGATTTCTCGTAAGGTGCCGAACAATGCATAATATTGAGGTTGTCCGATCCCTAGTCGGCATAGTTTACTGTTAAGACTACAATGGTATCTGATCGTTTTCGATCCCCTAACCTTCGTTCTTGATTAATGAAAACATCCTTGGCAAATGCTTTCGCAGTAGTCGGTCTTCGGTCAATCCAAGAATTTCACCTCTAGCGACCGAATACCAATGCCCCCAACTATCCCTATTAATCATTACGGCGACTCTAGAAACCAACAAAATAGAACCGCACG	DQ435811	357	1.33078e-149	0.96	1	384	0	0	0	0	0	0	6	0	0	0	0	13	0	0	0	0	0	0	0	0	0	0	0	0	0	116	0	0
S1196_0877	Glomeromycota	Glomeromycetes	CCCCGTGTTGAGTCAAATTAAGCCGCAGGCTCCACTCCTGGTGGTGCCCTTCCGTCAATTCCTTTAAGTTTCAGCCTTGCGACCATACTCCCCCCAGAACCCAAAAACTTTGATTTCTCACAAGGTGCCAAACAAGTATGAATATCTCTCGTCTGATCCCTAGTCGGCATAGTTTATGGTTAGGACTACGACGGTATCTGATCGTCTTCGATCCCCTAACTTTCGTTCTTGATTAATGAAAACATCCTTGGCAAATGCTTTCGCAGAAGTTAGTCTTTAATAAATCCAAGAATTTCACCTCTGACAATTAAATACTAATGCCCCCAACTGTCCCTATTAATCATTACTTCGGTCCTAGAAACCAACAAAATAGAACCAAAG	AF229771	359	1.71475e-150	0.97	1	381	0	0	0	0	0	0	0	0	0	0	4	0	0	0	0	0	0	0	0	0	0	0	0	0	0	0	0	0
S1196_0880	Ascomycota	Sordariomycetes	CCCCGTGTTGAGTCAAATTAAGCCGCAGGCTCCACCCCTGGTGGTGCCCTTCCGTCAATTTCTTTAAGTTTCAGCCTTGCGACCATACTCCCCCTGGAGCCCAAGCACTTTGATTTATCGTAAGGTGCCGAACGAGTCAAAAAATAACATCGTCCGATCCCTAATCGGCATAGTTTATGGTTAAGACTACGACGGTATCTGATCGTCTTCGATCCCCTAACTTTCGTTCCTGATTAATGAAAACATCCTTGGCGAATGCTTTCGCAGTAGTTCGTCTTCAATAGATCCAAGAATTTCACCTCTGACAATTGAATACGGACGCCCCCGACTGTCCCTATTAATCATTACGGCGGTCCTAGAAACCAACAAAATGGAACCGCACG	EU420126	367	4.93164e-154	0.97	1	383	984	969	622	611	4181	415	10369	1516	5	361	670	865	2214	438	5840	210	90	265	166	1709	371	836	4862	3330	2549	481	169	199
S1196_0881	Ascomycota	Fungi_other	CCCCGTGTTGAGTCAAATTAAGCCGCAGGCTCCACTCCTTGTGGTGCCCTTCCGTCAATTTCTTTAAGTTTCAGCCTTGCGACCATACTCCCCCTGGAGCCCAAGCACTTTGATTTCTCGTAAGGTGCCGAGCGAGTCAAGTATTAAACATCGCCCGATCCCTAGTCGGCATAGTTTATGGTTAAGACTACGACGGTATCTGATCGTCTTCGATCCCCTAACTTTCGTTCCCTGATTAATGAAAACATCCTTGGCAAATGCTTTCGCAGTAGTTAGTCTTCAACCGATCCAAGAATTTCACCTCTGACAGTTGAATACTGATGCCCCCGACTGTCCCTATTAATCATTACGGCGGTCCTAGAAACCAACAAAATAGAACCACACG	GQ120170	357	1.33478e-149	0.96	1	385	0	0	0	17	1	25	2	0	0	0	3	389	3	5	0	0	1	0	0	2	0	2	1	0	0	1	0	16
S1196_0883	Ascomycota	Sordariomycetes	CCCCGTGTTGAGTCAAATTAAGCCGCAGGTTCCACCCCTGGTGGTGCCCTTCCGTCAATTTCTTTAAGTTTCAGCCTTGCGACCATACTCCCCCTGGAGCCCAAGCACTTTGATTTCTCGTAGGGTGCCGAACGGGTCAAATGATAACACCGCCCGATCCCCAGTCGGCATAGTTTATGGTTAAGACTACGACGGTATCTGATCGTCTTCGATCCCCTAACTTTCGTTCTTGATTAATGAAAACATCCTTGGCGAATGCTTTCGCAGTAGTTAGTCTTCAATCAATCCAAGAATTTCACCTCTGACGATTGAATACTGACGCCCCCGACTGTCCCTATTAATCATTACGGCGGTCCTAGAAACCAACAAAATAGAACCGCGCG	FJ176807	359	1.72518e-150	0.96	1	383	18	0	0	175	1897	213	1028	0	0	0	0	537	65	1	1	0	1	5	0	0	0	3	3	3	2	0	0	62
S1196_0885	Glomeromycota	Glomeromycetes	CCCCCGTGTTGAGTCAAATTAAGCCGCAGGCTCCACCCCTGGTGGTGCCCTTCCGTCAATTCCTTTAAGTTTCAGCCTTGCGACCATACTCCCCCCGGAACCCAAACACTTTGGTTTCCCGTAAGGCGCCGAATGAGTCATTAAAAAATTAACATCATCCGATCCCTAGTCGGCATAGTTTATGGTTAAGACTACGACGGTATCTGATCGTCTTCGATCCCCTAACTTTCGTTCTTGATTAATGAAAACATCCTTGGCAAATGCTTTCGCAGTAGTTAGTCTTCAATAAATCCAAGAATTTCACCTCTGACAATTGAATACTAATGCCCCCAACTATCCCTATTAATCATTACGTTGATCCTAGAAACCAACAAAATAGAATCGAACG	AY903711	383	4.09088e-161	0.99	2	388	457	1198	86	356	471	676	65	25	1	184	180	1198	1188	671	9	57	669	43	244	20	69	367	17	110	1	78	218	77
S1196_0887	Basidiomycota	Agaricomycetes	CCCGTCAATTTGAGGGTCTTGCCCAGGTGAGAACACTTGGACTAGCATTTAAATTTAGGAAAGGTAATCTTTTTCCTGGGCTGAACCACCTCACCTTTTCAGGCTGCTATTCGGTGCAGAGCTACTGCGGCTAGCTGTGAGCATGTTTACACCTGGTGGTGCCCTTCCGTCAATTCCTTTAAGTTTCAGCCTTGCGACCATACTCCCCCCAGAACCCAAAGACTTTGATTTCTCGTAAGGTGCCGAGCGACACATCATAATTGAGTTCGCCCGATCCCTAGTCGGCATAGTTTACTGTTAAGACTACAACGGTATCTGATCGTTTTCGATCCCCTAACCTTCGTTCTTGATTAATGAAAACATCCTTGGCAAACGCTTTCGCAACAGTTGGTCTTGAGT…	JN940525	451	0	0.96	1	500	0	0	0	0	0	0	0	0	0	0	0	9	0	1	0	0	0	0	0	0	0	2	0	0	0	0	0	0
S1196_0889	Ascomycota	Fungi_other	CCCCGTGTTGAGTCAAATTAAGCCGCAGGCTCCACGCCTGGTGGTGCCCTTCCGTCAATTTCTTTAAGTTTCAGCCTTGCGACCATACTCCCCCCAGAACCCAAACACTTATGATTTCTCCCAAGGTGCCGATCGAGTCAAAATAACAACATCGACCGATCCCTAGTCGGCATAGTTTACAGTCAAGACTACGACGGTATCTGATCGTCTTCGATCCCCTGACTTTCGTTCACTGATTAATGAAAACATCCTTGGCGAATGCTTTCGCAGTAGTTAGTCTTCAGCAAATCCAAGAATTTCACCTCTGACAGCTGAATACTAGCGCCCCCGACTGTCCCTATTAATCATTACGGCTCTCCTAGAAACCAACAAAATAAGAAAGCCG	DQ346775	336	2.67916e-140	0.94	1	376	2	0	0	0	0	0	0	0	0	0	0	0	0	0	0	0	0	0	0	0	0	0	0	0	0	0	0	0
S1196_0891	Ascomycota	Sordariomycetes	CCCCGTGTTGAGTCAAATTAAGCCGCAGGCTCCACCCCTGGTGGTGCCCTTCCGTCAATTTCTTTAAGTTTCAGCCTTGCGACCATACTCCCCCCGGAACGCAGAAACTTATACTTTCGTGTAAGGTGCCGAACGAGTCAAAAAATAACATCGTCCGATCCCTAGTTCGCATAGTTTATGGTTAAGACTACGACGGTATCTGATCGTCTTCGATCCCCTAACTTTCGTTCCTGATTAATGAAAACATCCTTGGCAAATGCTTTCGCAGTAGTTAGTCTTCAATAAATCCAAGAATTTCACCTCTGACAATTGAATACTGATGCCCCCGACTGTCCCTATTAATCATTACGGCGGTCCTAGAAACCAACAAAATAGAACCGCAACG	DQ470998	372	3.02486e-156	0.98	1	382	23	25	3	31	17	3	46	4	0	10	12	11	10	16	38	65	15	438	269	4	281	26	46	8	7	99	6	5
S1196_0892	Ascomycota	Eurotiomycetes	ACGTCTTGTGGTGCCCTTCCGTCAATTTCTTTAAGTTTCAGCCTTGCGACCATACTCCCCCCAGAACCCAAAAACTTTGATTTCTCGTAAGGTGCCGAACGGGTCATCATAAAAACACCGTCCGATCCCTAGTCGGCATAGTTTATGGTTAAGACTACGACGGTATCTGATCGTCTTCGATCCCCTAACTTTCGTTCCCTGATTAATGAAAACGTCCTTGGCGAATGCTTTCGCAGTAGTTAGTCTTCAGCAAATCCAAGAATTTCACCTCTGACAGCCGAATACTGACGCCCCCGACCATCCCTATTAATCATTACGGCGGTCCTAGAAACCAACAAAATAGAATCACACG	FJ358340	340	4.08089e-142	0.98	1	352	0	0	0	2	1	8	0	0	0	0	1	0	1	0	0	0	0	0	0	0	0	0	1	0	1	0	0	0
S1196_0894	Ascomycota	Fungi_other	CCCCGTGTTGAGTCAAATTAAGCCGCAGGCTCCACGCCTGGTGGTGCCCTTCCGTCAATTTCTTTAAGTTTCAGCCTATAAAAGTTAGCATACGTAATGTAGGAGATATGTAAACGCTTACCTTGCGACCATACTCCCCCCAGAACCCAAAAACTTTGATTTCTCGTAAGGTGCCGAGCGAGTCAAAACAGTAACATCGCCCGATCCCTAGTCGGCATAGTTTATGGTTAAGACTACGACGGTATCTGATCGTCTTCGATCCCCTAACTTTCGTTCCTGATTAATGAAAACATCCTTGGCAAATGCTTTCGCAGTAGTTTGTCTTCAATAAATCCAAGAATTTCACCTCTGACAATTGAATACAGATGCCCCCGACTATCCCTATTAATCATTACGGCG…	GU323992	300	2.69364e-124	0.98	121	430	0	0	0	0	0	0	0	0	0	0	0	0	0	0	0	0	0	0	0	0	0	0	0	0	0	0	0	0
S1196_0896	Basidiomycota	Agaricomycetes	CCCCGTGTTGAGTCAAATTAAGCCGCAGGCTCCACTCCTGGTGGTGCCCTTCCGTCAATTCCTTTAAGTTTCAGCCTTGCGACCATACTCCCCCCAGAACCCAAAGACTTTGATTTCTTGTAAGGTGCCGAGCGACACATTGTTGGTGATCGCCCGATCCCTAGTCGGCATAGTTTACTGTTAAGACTACAACGGTATCTGATCGTTTTCGATCCCCTAACCTTCGTTCTTGATTAATGAAAACATCCTTGGCAAATGCTTTCGCAGTAGTTGGTCTTGAGTCAATCCAAGAACTTCACCTCTAGCGACTCAATACCAATGCCCCCAACTATCCCTATTAATCATTACGGCGACTCTAGAAACCAACAAAATAGAACCGCACGTCCTATTCCATTATTC…	U23544	382	1.18513e-160	0.97	1	403	0	0	0	1	0	0	0	0	0	0	1	3481	2	0	0	0	0	0	0	0	0	0	0	0	0	1	0	0
S1196_0897	Chytridiomycota	Chytridiomycetes	CCCCGTGTTGAGTCAAATTAAGCCGCAGGCTCCACTCCTGGTGGTGCCCTTCCGTCAATCCCTTTAAGTTTCAGCCTTGCGACCATACTCCCCCCGGAACCCAAACGCTTTGATTTCTCATAACATGCCGGGCGAGACATTTAAAAATATACTCGCCCGATCTGTAGCCGGCAACATTTATGGTTAAGACTACGACGGTATCTGATCGTCTTGGATCCCTTAACTGTCCCTCATGATCAATGAAAACATCCTTGGCAGATGCTTTCGCAGAAGTGGGTCTTTCATAAATCCAAGAATTTCACCTCTGACAATGAAATACCAGTGCCCCCAACTGTTCCTGTCAATCATTACTTTGATCTTAGAAACCAACAAAATAAGACCAAAG	DQ536475	363	2.93446e-152	0.97	1	385	0	0	0	0	0	0	0	0	0	0	0	6	0	0	0	0	0	0	0	0	0	0	0	0	0	0	0	0
S1196_0898	Chytridiomycota	Chytridiomycetes	CCCCGTGTTGAGTCAAATTAAGCCGCAGGCTCCACTCCTGGTGGTGCCCTTCCGTCAATTCCTTTAAGTTTCAGCCTTGCGACCATACTCCCCCTGGAACCCAAAGACTTTGATTTCTCGCAAGGTGCCGAGCGAGTCATTAAATAACATCGCCCGATCCCTAGTCGGCATAGTTTATGGTTAAGACTACGACGGTATCTAATCGTCTTCGATCCCCTAACTTTCGTTCTTGATTAATGAAAACATCCTTGGCAAATGCTTTCGCAGAAGTTGGTCTTTCATAAATCCAAGAATTTCACCTCTAGCAATTAAATACCAATGCCCCCAACTATCCCTATTAATCATTACCTCAGTCCTCGAAAACCAACAAAATAGAACCGTGG	AY987439	342	5.85464e-143	0.95	1	379	7	20	19	36	46	9	0	2	0	3	112	28	54	108	24	35	39	38	21	4	38	32	3	12	13	41	7	7
S1196_0899	Ascomycota	Fungi_other	CCCCGTGTTGAGTCAAATTAAGCCGCAGGCTCCACTCCTGGTGGTGCCCTTCCGTCAATTTCTTTAAGTTTCAGCCTTGCGACCATACTCCCCCCAGAACCCAAAAACTTTGATTTCTCGTAAGGTGCCGATCGAGTCATAAAAAGAACATCGACCGATCCCTAGTCGGCATCGTTTATGGTTAAGACTGTAACATCATAATTAGTATTTGTAACATAAAATTTGACACAAAAAGTCAAGTAAGAAGGAGTCGGATTATAAACTTACCTACGACGGTATCTGATCGTCTTCGATCCCCTAACTTTCGTTCACTGATTAATGAAAACATCCTTGGCAAATGCTTTCGCAGTAGTTAGTCTTCAGCAAATCCAAGAATTTCACCTCTGACAGCTGAATACT…	DQ104807	183	1.97167e-72	0.96	268	464	0	0	0	0	0	0	0	0	0	0	0	0	0	0	0	0	11	0	0	0	0	0	0	0	0	0	0	0
S1196_0900	Ascomycota	Fungi_other	TCCCGTGTTGAGTCAAATTAAGCCACAGGCTCCACCCCTTGTGGTTTCCTTTCGTCAATTTCAGCCTTGCGACCATACTCTCCCCAGAACCCAAAAACTTTACTTTCGTGTAAGGTGCCAAACGCGTCAAGAAATAACATCGTCCGATTCCTAGTCGGCATAGTTTATGGTTAAGACTACAACGGTATCTGATCGGTTTCGATCCCCTAACTTTCGTTCCTGATTAATGAAAACATTCTTGGCAAATGCTTTCGCAGTAGTTAGTCTTCAATTTATCCAAGAATTTCACCTCTGACAATTAAATACTAATGCCCCGACTGTTCTTATTAGTCATTACGGCGGTCCTAGAAACTAACAAATAGAACCGCAACG	AY271802	302	2.96509e-125	0.91	2	372	31	0	0	6	0	0	0	0	0	0	0	0	0	0	0	0	0	0	0	0	0	0	0	0	0	0	0	0
S1196_0904	Chytridiomycota	Chytridiomycetes	TCCCGTGTTGAGTCAAATTAAGCCGCAGGCTCCACTCCTGGTGGTGCCCTTCCGTCAATTCCTTTAAGTTTCAGCCTTGCGACCATACTCCCCCCGGAACCCAAAAACTTTGATTTCTCATAAGGTGCCGAACGAGTCAATAAGTTAACGTCGTCCGATCCCTAGTCGGCATAGTTTATGGTTAAGACTACGACGGTATCTGATCGTCTTCGATCCCCTAACTTTCGTTCTTGATTAATGAAAACATCCTTGGCAAATGCTTTCGCAGAAGTTAGTCTTTCATAAATCCAAGAATTTCACCTCTGACAATTAAATACTAATGCCCCCAACTATCCCTATTAATCATTACTTCGGTCCTAGAAACCAACAAAATAGAACCAAAGTCCTATTTTATTATTC…	HQ901748	403	5.93806e-170	0.99	1	405	15	30	5	82	10	175	16	4	0	2	43	780	4	2	0	8	31	15	24	3	21	43	6	11	15	2	1	20
S1196_0905	Basidiomycota	Agaricomycetes	CCCCGTGTTGAGTCAAATTAAGCCGCAGGCTCCACTCCTGGTGGTGCCCTTCCGTCAATTCCTTTAAGTTTCAGCCTTGCGACCATACTCCCCCCAGAACCCAAAGACTTTGATTTCTCGTAAGGTGCCGAGCGACACATAAATTTGAGTTCGCCCGATCCCTAGTCGGCACGGTTTACTGTTAAGACTACAACGGTATCTGATCGTTTTCGATCCCCTAACCTTCGTTCTTGATTAATGAAAACATCCTTGGCAAATGCTTTCGCAGTAGTTAGTCTTCAGTAAATCCAAGAATTTCACCTCTAGCAACTGAATACTAATGCCCCCAACTATCCCTATTAATCATTACGGCGACTCTAGAAACCAACAAAATAGAACCGCACG	EF053586	380	8.62097e-160	0.99	1	384	16	3	61	22	799	49	705	125	0	41	45	537	405	245	7	15	4	1	9	35	38	191	9	43	8	30	1	2
S1196_0906		Fungi_other	CCCCGTGTTGAGTCGAATTAAGCCGCAGGCTCCACTCCTGGTGGTGCCCTTCCGTCAATTCCTTTAAGTTTCAGCCTTGCGACCATACTCCCCCCAGAACCCAAAAACTTTGATTTCTCACAAGGTGCCGAGCGGGTCTGATGAACCACGCCCGATCCCCAGTCGGCATCGTTTACGGTTAAGACTACGACGGTATCTAATCGTCTTCGATCCCTTAACTTTCGTTCTTGATTAATGAAAACGTCCTTGACAAACGCTTTCGCAATCGTGAGTCTTCGATAAATCCAAGAATTTCACCTCTGACTATCGAATTCTAATGCCCCCAACCGTCCCTATTAATCATTATGTCGATCCTAGAAACCAACAAAATAGGACCCACA	AY500848	307	1.85293e-127	0.91	1	376	0	63	0	0	0	0	0	0	0	0	0	0	0	0	3	0	0	0	0	0	0	0	0	0	0	0	18	0
S1196_0908	Ascomycota	Fungi_other	CCCCGTGTTGAGTCAAATTAAGCCGCAAGTTCCACCCCTGGTGGTGCCCTTCCGTCAATTTCTTTAAGTTTCAGCGTTGCCGCCATACTCCCCCTGGAGCCCAAGCACTTTGATTTCTCGAACGGTGCCGAGCAAGTCTCGAAAACTTTGCCCGATCCCGAGTCGGCATAGTTTATGGTTGAGACTACGACGGTATCTGATCGTCTTCGATCCCCCAACTTTCGTTCCTGATCAGCGAAAACGTTCTTGGCAAATGCTTTCGCAGTAGTTAGTCTTCAGCCGGTCTAAGAATTTCACCTCTCGCGGCTGAATACTGATGCCCCCGGCCGTCCCTATTGATCATTATGGCGGTCCCAGAAACCAACGAAACGGAACCAACG	AY484511	329	3.32883e-137	0.93	1	380	1	0	0	0	0	0	0	0	0	0	0	0	0	7	0	0	0	0	0	0	0	0	0	0	0	0	0	0
S1196_0909	Cryptomycota	Fungi_other	TCCCGTGTTGAGTCAAATTAAGCCGCAGGCTCCACTCCTGGTGGTGCCCTTCCGTCAATTCCTTTAAGTTTCAGCCTTGCGACTATACTACCCCCAGAACCCAAACACTTTGATTTCTCGTAAGGTGCCGATGGCGTCACTACAACCTCCACCGATCCCTAGTCGGCATAGTTTACGGTTAAGACTACGACGGTATCTAATCGTCTTTGATCCCCTAACTTTCGTTCTTGATTAATGGGAACATCCTTGGCAAACGCTTCCGCACCAGTCAGTCTTCCGTAAATCCAAGAATTTCACCTCTGACTACGGAATACCAATGCCCCCAACTGTCCCTATTGATCATTACCTTGGTCCTCAAACCAACAAAATAGAACCAACGTCCTATTCCATTATTCCATT	AF372713	334	2.14706e-139	0.92	1	398	17	0	8	1	0	0	0	0	0	0	0	0	0	0	0	0	0	0	0	0	1	0	0	1	0	0	2	0
S1196_0910	Entomophthoromycota	Entomophthoromycetes	CCCCGTGTTGAGTCAAATTAAGCCGCAGGCTCCACTCCTGGTGGTGCCCTTCCGTCAATTCCTTTAAGTTTCAGCCTTGCGACCATACTCCCCCCGGAACCCAAAAACTTTGATTTCTCATATGGTGCCGATCAAGTCATAAAATAACATTGACCGATCCCAAGTCGGCATAGTTTATGGTTAAGACTACGACGGTATCTGATCGTCTTCGATCCCCTAACTTTCGTTCTTGATTAATGAAAACATCCTTGGCAAATGCTTTCGCAGAAGTTAGTCTTTCATAAATCCAAGAATTTCACCTCTGACAATTAAATACTAATGCCCCCAACTATCCCTATTAATCATTACCTTGGTCCTAGAAACCAACAAAATAGAACCAAAG	AF368505	382	1.11422e-160	1	1	382	0	0	0	6	2	5	0	1	0	0	8	61	12	0	0	1	1	42	0	0	0	2	6	0	0	1	0	6
S1196_0912	Basidiomycota	Fungi_other	CCCTATGTTGAGTCAAATTAAGCCATAGGCTCCACTCCTGGTGGTGCCCTTCCATCCATTCCTTTAAGTTTCAGCCTTGCGACCATACTCCCCCCAGAACCCAAAGACTTTGATTTCTCATAAGGTGCTGAACGATGCATAAAATTGAGGTCATCTGATCCCTAGTCAGCATAGTTTACTGTTAAGACTACAATAGTATCTGATCGTTTTCAATCCTCTAACCTTCATTCTTGATTAATGAAAACATCCTTGGCAAATGCTTTTGCAATAGTTTGCCTTGCATAAATCCAAGAATTTCACCTCTAGCAACGAAATACAAATGCCCCCAACTATCCCTATTAATCATTACAGTGACTCTAGAAACCAACAAAATAGAACCACATG	DQ457626	330	1.215e-137	0.93	1	382	0	0	0	14	0	0	0	0	0	0	0	0	0	0	0	0	0	0	0	0	0	0	0	0	0	0	0	1
S1196_0913	Ascomycota	Sordariomycetes	CCCCGTGTTGAGTCAAATTAAGCCGCAGGCTCCACTCCTGGTGGTGCCCTTCCGTCAATTTCTTTAGGTTTCAGCCTTGCGACCATACTCCCCCTGGAACCCACACACTCTTAATTTCTCGTAAGGTGCCGAACGAGTCAAAAAATAACATCGTCCGATCCCTAGTCGGCATAGTTTATGGTTAAGACTACGACGGTATCTGATCGTCTTCGATCCCCTAACTTTCGTTCCTGATTAATGAAAACATCCTTGGCAAATGCTTTCGCAGTAGTTAGTCTTCAATAAATCCAAGAATTTCACCTCTGACAATTGAATGCCGATGCCCCCGACTGTCCCTATTAATCATTACGGCGGTCCTAGAAACCAACGAAATAGAACCACACG	GQ996541	376	5.09892e-158	0.98	1	384	0	1	1	16	16	21	1	0	0	2	1	48	85	20	0	1	1	46	0	1	3	1	0	2	1	0	0	1
S1196_0914	Chytridiomycota	Chytridiomycetes	CCCCGTGTTGAGTCAAATTAAGCCGCAGGCTCCACGCCTTGTGGTGCCCTTCCGTCAATTTCTTTAAGTTTCAGCCTTGCGACCATACTCCCCCCAGAACCCAAAAACTTTGATTTCTCGTAAGGTGCCGAACGGGTCATCATAGAATCCCGTCCGATCCCTAGTCGGCATAGTTTATGGTTAAGACTACGACGGTATCTGATCGTCTTCGATCCCCTAACTTTCGTTCTTGATTAATGAAAACATCCTTGGCAAATGCTTTCGCAGAAGTTAGTCTTTAATAAATCCAAGAATTTCACCTCTGACAATTAAATACTAATGCCCCCAACTATCCCTATTAATCATTACTTCGGTCCTAGAAACCAACAAAATAGAACCAAAG	DQ536473	355	1.01728e-148	0.96	1	382	301	592	215	686	1620	1413	3879	38666	248	152	1006	95	40	41	11578	464	64	349	62	22063	295	93	27770	3482	14314	410	174	224
S1196_0917	Ascomycota	Dothideomycetes	CCCCGTGTTGAGTCGAATTAAGCCGCAGGCTCCACGCCTGGTGGTGCCCTTCCGTCAATTTCTTTAAGTTTCAGCCTTGCGACCATACTCCCCCCAGAACCCAAACACTTTGATTTCTCGTAAGGTGCCGATGGAGTCAAAAAGATAACATCCACCGATCCCTAGTCGGCATCGTTTATGGTTAAGACTACGACGGTATCTGATCGTCTTCGATCCCCTAACTTTCGTTCACTGATTAATGAAAACATCCTTGGCAAATGCTTTCGCAGTAGTTCGTCTTCAATAAATCCAAGAATTTCACCTCTGACAATTGAATACGGATGCCCCCGACTATCCCTATTAATCATTACGGCGGTCCTAGAAACCAACAAAATAGAACCGCACGTCCTATTCCATTAT…	EU167612	398	9.82249e-168	0.98	1	408	0	0	0	0	0	0	0	2	0	0	4	1	7	2	1	0	1	0	0	0	0	1	0	0	0	0	0	0
S1196_0919	Ascomycota	Leotiomycetes	CCCCGTGTTGAGTCAAATTAAGCCGCAGGCTCCACTCCTGGTGGTGCCCTTCCGTCAATTTCTTTAAGTTTCAGCCTTGCGACCATATTCCCCCCCAAGCCCAAGCACTTTGATTTCTCGTAAGGTGCCGAGCGAGTCAAAAAAGTAACATCGCCCGATCCCTAGTCGGCATAGTTTATGGTTAAGACTACGACGGTATCTGATCGTCTTCGATCCCCTAACTTTCGTTCCTGATTAATGAAAACATCCTTGACAAATGCTTTCGCAGTAGTTAGTCTTCAATAAATCCAAGAATTTCACCTCTGACAATTGAATACTGATGCCCCCGACTGTCCCTATTAATCATTACGGCGGTCCTAGAAACCAACAAAATAGAACCACACG	AF515338	365	3.80419e-153	0.97	1	384	0	3	0	0	14	0	0	0	0	0	3	0	0	5	4	0	0	0	0	0	0	1	0	0	0	1	2	0
S1196_0920	Ascomycota	Fungi_other	CCCCGTGTTGAGTCAAATTAAGCCGCAGGCTCCACGCCTGGTGGTGCCCTTCCGTCAATTTCTTTAAGTTTCAGCCTTGCGACCATACTCCCCCCAGAACCCAAAGACTTTGATTTCTCGCAAGGTGCCGAGCGGGTCATCGTAGGAACGCCGCCCGATCCCTAGTCGGCATGGTTTACGGTTAAGACTACGACGGTATCTGATCGTCTTCGATCCCCTAACTTTCGTTCGCTGACTAATGAAAACATCTTTGGCAAATGCTTTCGCAGTGGTTAGTCTTCGGCCAATCCAAGAGTTTCACCTCTGACGGCCGAATACTGATGCCCCCAACCATCCCTGCTAATCATTACGACGGTCCTAGAAACCAACAAAATAGAACCGCACG	FJ358349	341	1.63342e-142	0.94	1	385	0	0	0	0	1	0	0	1	0	0	0	19	0	0	0	0	0	0	0	0	0	0	0	0	0	0	0	0
S1196_0921	Ascomycota	Fungi_other	CCCCGTGTTGAGTCAAATTAAGCCGCAGGCTCCACCCCTGGTGGTGCCCTTCCGTCAATTCCTTTAAGTTTCAGCCTTGCGACCATACTCCCCCCGGAACCCAAACACTTTGGTTTCCCTCGGGGCGCCGAGCGAGTCACGAAAAATAACATCGCCCGATTCCCAGTCGGCATAGTTTATGGTTGAGACTACGACGGTATCTGATCGTCTTCGATCCCCCAACTTTCGTTCTTGATTAATGAAAACATCCTTGGCAAATGCTTTCGCAGTAGTTCGTCTTCAATAAATCCAAGAATTTCACCTCTGACAATTGAATACGAATGCCCCCAACTATCCCTATTAATCATTACGACTGTCCCGGAAACCAACAAAATAGAACCGCACG	U53386	339	1.2562e-141	0.94	1	385	0	0	0	10	75	23	8	0	0	0	0	17	318	0	0	0	0	0	0	0	0	26	0	0	0	0	0	2
S1196_0923	Ascomycota	Fungi_other	CCCCGTGTTGAGTCAAATTAAGCCGCAGGTTCCACCCCTTGTGGTGCTCTTCCGTCAATTTCTTTAAGTTTCAGCCTTGCGACCGTACTCCCCCTGCAGCCCAAGAACTTTGATTTCTCGTAAGGTGCCGAGCGGGTCAGAGATGAACACCGCCCGATCCCTAGTCGGCATCGTTTATGGTTGAGACTACGACGGTATCTGATCGTCTTCGATCCCCCAACTTTCGTTCCTGATTAATGAAAACACCCTTGGCGAATGCTTTCGCAGTAGTTCGTCTTCCGTCAATCCAAGAATTTCACCTCTGACGACGGAATACGGACGCCCCCGATTGTCCCTATTAATCATTACGACCGTCCTAGAAACCAACAAAATAGAACGGCGCG	GQ280418	326	7.16451e-136	0.91	1	377	0	0	0	0	4	0	0	0	0	0	0	0	1	0	0	0	0	0	0	0	0	0	0	0	0	0	0	0
S1196_0924	Ascomycota	Pezizomycetes	CCCCGTGTTGAGTCAAATTAAGCCGCAGGCTCCACTCCTGGTGGTGCCCTTCCGTCAATTCCTTTAAGTTTCAGCCTTGCGACCATACTCCCCCCAGAACCCAAAGACTTTGATTTCTCGTAAGGTGCTGAGCGAGTCAAAATAGAACATCACCCAATCCCTAGTCGGCATAGTTTATGGTTAAGACTACGACGGTATCTGATCGTCTTCGATCCCCTAACTTTCGTTCCCTGATTAATGAAAACATCCTTGGCAAATGCTTTCGCAGTAGTTAGTCTTCAATCGATCCAAGAATTTCACCTCTGACGATTGAATACTGATGCCCCCGACTATCCCTATTAATCATTACGGTGGTCCTAGAAACCAACAAAATAGAACCACACG	U62013	380	8.62097e-160	0.99	1	384	0	1	0	106	62	1896	39	1	0	1	1	1	81	4	3	22	1	9	12	1	1	15	1	0	0	11	0	26
S1196_0926	Basidiomycota	Agaricomycetes	CCCCGTGTTGAGTCAATTTTGACATTGTTCACTCCTGGTGGTGCCCTTCCGTCAATTCCTTTAAGTTTCAGCCTTGCGACCATACTCCCCCCAGAACCCAAAGACTTTGATTTCTCGTAAGGTGCCGAACGACGCATAATATTGAGGTCGTCCGATCCCTAGTCGGCATAGTTTACTGTTAAGACTACAACGGTATCTGATCGTTTTCGATCCCCTAACCTTCGTTCTTGATTAATGAAAACATCCTTGGCAAATGCTTTCGCAGTAGTTAGTCTTCAGTAAATCCAAGAATTTCACCTCTAGCAACTGAATACTAATGCCCCCAACTATCCCTATTAATCATTACGGCGACTCTAGAAACCAACAAAATAGAACCGCACGTCCTATTTCATTATTCCA…	U59069	371	8.84196e-156	0.96	1	403	0	0	0	0	0	0	0	0	0	0	32	0	0	0	0	0	0	0	0	1	0	0	0	0	0	0	0	0
S1196_0927	Ascomycota	Sordariomycetes	CCCCGTGTTGAGTCAAATTAAGCCGCAGGCTCCACCCCTGGTGGTGCCCTTCCGTCAATTTCTTTAAGTTTCGGCCTTGCGACTATACTCCCCCCAGAACCCAGAAACTTGTATTTTCATGTAAGGTGCCGAACGAGTCAAATAATAACATCGTCCGATCCCTAGTCGGCATAGTTTACGGTTAAGACTACGACGGTATCTGATCGTCTTCGATCCCCTAACTTTCGTTCCTGATTAATGAAAACATCCTTGGCAAATGCTTTCGCAGTAGTTAGTCTTCAATAAATCCAAGAATTTCACCTCTGACAATTGAATACTGATGCCCCCGACTGTCCCTATTAATCATTACGGCGGTCCTAGAAACCAACGAAATAGAACCGCACG	AY497510	370	2.31932e-155	0.98	1	384	3	3	9	0	0	0	10	0	0	0	2	11	1	2	0	0	0	0	2	0	0	0	0	0	0	2	0	0
S1196_0929	Ascomycota	Fungi_other	CCCCGTATTAAGTCAAATTAAGCCGCAGGCTCCACCCCTGGTGGTGCCCTTCCGTCAATTTCTTTAAGTTTCAGCATTGCCACCATACCTCCCCAGGAACCCACAGACTTTGATTTCTCGTAAGGTGCCAAACGAGTCAAATAGTAACATCGTCCGATCCCTAATCGGCATAGTTTATAGTTAAAACTACGACGGTATCTGATCGTCTTCGATCCCCTAACTATCGTTCCTAATTAATAAAAACATCCTTGGCAAATGCTTTCGCAGTAATTAATCTTCAATAGGTCTAAAAATTTCACCTCTGACTATTAAATACTAATGCCCCCGACTATCCCTATTAATTATTACGGCGGTCCTATAACCAACAAAATAAAACCACGCG	GU256632	334	2.04188e-139	0.93	1	382	0	0	0	0	0	0	0	0	0	0	0	0	3	0	0	0	0	0	0	0	0	0	0	0	0	0	0	0
S1196_0930	Cryptomycota	Fungi_other	TCCCGTGTTGAGTCAAATTAAGCCGCAGGCTCCACTCCTGGTGGTGCCCTTCCGTCAATTCCTTTAAGTTTCAGCCTTGCGACCATACTCCCCCCAGAACCCAAAAACTTTGATTTCTCTTAAGGTGCCAATGGAGTCACTAATGACAGCCACTGATCCCTAGTCGGCATAGTTTACGGTAAAGACTACGACGGTATCTGATCGTCTTTGATCCCCTTACTTTCGTTCTTGATTAATGAAAACATCCTTGCCAAATGCTTTCGCACTAGTTAGTCTCCTGGAAATCTAAGAATTTCACCTCTAGCTCCAGGATACTAATGCCCCCAACTGTCCCTATTAATCATTACTTTGGTCCTAGAAACCAACAAAATAGAACCACACG	FJ687268	320	3.24904e-133	0.92	1	378	0	0	0	0	0	4	0	0	0	0	0	0	0	0	0	0	0	0	0	0	0	0	0	0	0	0	0	2
S1196_0931	Ascomycota	Sordariomycetes	CCCCGTGTTGAGTCAAATTAAGCCGCAGGCTCCACCCCTGGTGGTGCCCTTCCGTCAATTTCTTTAAGTTTCAGCCTTGCGACCATACTCCCCCCAGAACCCAGACACTTATGCTTTCGCGCAAGGTGCCGAACAGGCCAAAGAATAGCACTGTCCGATCCCTAGTCGGCATAGTTTATGGTTAGGACTACGACGGTATCTGATCGTCTTCGATCCCCTAACTTTCGTTCCTGATTAATGAAAACATCCTTGGCAAATGCTTTCGCAGTAGTTAGTCTTCAATAGATCCAAGAATTTCACCTCTGACTATTGAATACTGATGCCCCCGACTGTCCCTATTAATCATTACGGCGGTCCTAGAAACCAACAAAATAGAACCGCGCGTCCTATTTTATTATT…	AY858662	380	9.19224e-160	0.96	1	406	1	54	74	51	0	55	35	48	2	153	33	6	0	0	7	15	0	205	7	1	2	0	0	30	76	85	0	29
S1196_0935	Ascomycota	Dothideomycetes	CCCCGTGTTGAGTCAAATTAAGCCGCAGGCTCCACGCCTGGTGGTGCCCTTCCGTCAATTTCTTTAAGTTTCAGCCTTGCGACCATACTCCCCCCAGAACCCAAACACTTTGATTTCTCGCAAGGTGCCGAGCGGGTCAAATAAATAACACCGCCCGATCCCTAGTCGGCATAGTTTATGGTTAAGACTACGACGGTATCTGATCGTCTTCGATCCCCTAACTTTCGTTCACTGATTAATGAAAACATCCTTGACAAATGCTTTCGCAGTAGTTAGTCTTCAATAAATCCAAGAATTTCACCTCTGACAATTGAATACTGATGCCCCCGACTGTCCCTATTAATCATTACGGCGGTCCTAGAAACCAACAAAATAGGACCGCACG	AF515360	377	1.84418e-158	0.98	1	385	0	0	0	1	2	1	2	0	0	0	6	39	6	10	2	0	0	5	0	0	2	3	1	0	0	0	0	1
S1196_0936	Ascomycota	Sordariomycetes	CCCCGTGTTGAGTCAAATTAAGCCGCAGGCTCCACACCTGGTGGTGCCCTTCCGTCAATTTCTTTAAGTTTCAGCCTTGCGACCATACTCCCCCTGGAGCCCAAGCACTTTGATTTCTCGTAAGGTGCCGAGCGGGTCAAATAGTAACACCGCCCGATCCCTAGTCGGCATAGTTTATGGTTAAGACTACGACGGTATCTGATCGTCTTCGATCCCCTAACTTTCGTTCCTGATTAATGAAAACATCCTTGGCAAATGCTTTCGCAGTAGTTAGTCTTCGGTAAATCCAAGAATTTCACCTCTGGCAACCGAATACTGATGCCCCCGACTGTCCCTATTAATCATTACGGCGGTCCTAGAAACCAACAAAATAGAACCACGCG	DQ470999	367	4.93164e-154	0.97	1	383	3	5	0	31	16	6	7	1	0	0	3	451	80	3	15	0	0	0	0	29	6	1	85	3	5	3	1	4
S1196_0940	Basidiomycota	Agaricomycetes	CCCCGTGTTGAGTCAAATTAAGCCGCAGGCTCCACACCTGGTGGTGCCCTTCCGTCAATTCCTTTAAGTTTCAGCCTTGCGACCATACTCCCCCCAGAACCCAAAGACTTTGATTTCTCGTAAGGTGCCGAATGACCCATTAAATTAGAGGTACATCCGATCCCTAGTCGGCATAGTTTACTGTTAAGACTACAACGGTATCTAATCGTTTTTGATCCCCTAACCTTTGTCCTTGACCAATGAAAACATCCTTGGCAAATGCTTTCGCACTAGTTGGTCTTGAGCCAATCCAAGAATTTCACCTCTAGCGGCTCAATACCAATGCCCCCAACTGTCCCTATTAATCATTACGGCGATTCTAGAAACCAACAAAATAGAACCACACGTCCTATTCCATTA…	AF287835	369	6.91625e-155	0.95	1	409	0	1	5	3	0	32	0	0	0	14	39	1	4	0	0	2	0	430	0	0	0	2	2	1	1	1	0	2
S1196_0941	Ascomycota	Eurotiomycetes	CCCCGTGTTGAGTCAAATTAAGCCGCAGGCTCCACTCCTGGTGGTGCCCTTCCGTCAATTCCTTTAAGTTTCAGCCTTGCGACCATACTCCCCCCAGAACCCAAAGACTTTGATTTCTCGTAAAGTGCCGAACGGGGCATAAAAAAACCACCGTCCGATCCTTAGTCGGCATAGTTTATGGTTAAGACTACGACGGTATCTGATCGTCTTCGATCCCCTAACTTTCGTTCACTGATTAATGAAAACATCCTTGGCGAATGCTTTCGCAGTAGTTAGTCTTCAATAAATCCAAGAATTTCACCTCTGACAATTGAATACTGACGCCCCCGACTATCCCTATTAATCATTACAGCGGTCCTAGAAACCAACAAAATAGAACCGATG	FJ358335	374	3.92138e-157	0.98	1	384	13	1	1	25	2	12	1	0	0	1	82	6	10	61	6	9	9	0	0	1	51	15	1	2	2	9	1	10
S1196_0942	Basidiomycota	Pucciniomycetes	CCCCGTGTTGAGTCAAATTAAGCCGCAGGCTCCACTCCTGGTGGTGCCCTTCCGTCAATTCCTTTAAGTTTCAGCCTTGTGACCGTACTCCCCCACGAACCTAAACTTAAGGTTTCCCTTTGGGTGCCGAACAAGTCATGATAAAGCCTTGTCCGATCCCCAGTCGGCATAGTTTACTGTTAAGACTACAACGGTATCTGATCGTTTTTGATCCCCTAACCTTCGTTCTTGATCAATGAAAACATCCTTGGCAAATGCTTTCGCAGTAGTTTGTCTTACAGCAATCCAAGAATTTCACCTCTGACGCTGTAATACAAATGCCCCCAACTATCCCTATTAATCATTACGGCGCTCTTAGAAACCAACAAAATAGGAGTGCGCG	DQ241438	380	8.56904e-160	0.99	1	382	3	2	0	2	5	1	0	0	0	0	11	0	3	4	0	1	2	0	0	1	7	4	3	9	0	0	1	0
S1196_0943	Kickxellomycota	Fungi_other	TCCCGTGTTGAGTCAAATTAAGCCGCAGGCTCCACTTCTGGTGGTGCCCTTCCGTCAATTCCTTTAAGTTTCAGCCTTGCGACCATACTCCCCCCGGAACCCAAACACTTGTGATTTCTCGCAGAGTCCAGAGCAAAGTCCTACCTTTGCCCCATCCCCGGTCGGCATCGTTTACAGCACAAGACTACGCCGGTCTCTAATCAGCTTTGCTCCCTTGGCTTTCGTTCTTGATCAATGGACACATGCTGGACAATCGCTTTCGCATCAGTTTGACTTGCTAGGATCCAAGAATTTCACCTCTAACCACACAATTCAAATGCCCCCAACTGTTCCTATTAATCATTACCTCGGCCCTGTAAGCCAACAAAACAAGACCAAAG	AY546685	310	8.68797e-129	0.91	1	376	0	0	0	0	0	0	0	0	0	0	0	0	0	0	0	0	0	0	0	0	0	2	0	0	0	0	0	0
S1196_0946	Ascomycota	Fungi_other	CCCCGTGTTGAGTCAAATTAAGCCGCAGGCTCCACTCCTGGTGGTGCCCTTCCGTCAATTTCTTTAAGTTTCAGCCTTGCGACCATACTCCCCCCAGAACCCAAAAACTTTGATTTCTCACAAGGTGCCAAGCAGGTCATAGAAAAAAACACCGCCTGATCCCTAGTCGGCATAGTTTATGGTTAAGACTACGACGGTATCTGATCGTCTTCGATCCCCTAACTTTCGTTCGCTGATTAATGAAAACATCTTTGGCAAATGCTTTCGCAGTGGTTAGTCTTCGACAAATCCAAGAATTTCACCTCTGACAGCCGAATACTGATGCCCCCAACCATCCCTATTAATCATTACGGTGGTCCTAGAAACCAACAAAATAGGATCACACGTCCTATTTTATTA…	FJ358349	365	4.09065e-153	0.94	1	409	0	8	26	13	13	0	0	0	0	0	0	0	0	0	0	0	0	1	4	0	0	9	9	138	0	0	8	1
S1196_0947	Ascomycota	Fungi_other	CCCCGTGTTGAGTCAAATTAAGCCGCAGGCTCCACTCCTGGTGGTGCCCTTCCGTCAATTCCTTTAAGTTTCAGCCTTGCGACCATACTCCCCCCAGAACCCAAAAACTTTGATTTCTCGCGAGGTGCCGAGCGAGTCGTTGGACTACGCCCGATCCCTAGTCGGCATGGTTTATGGTTAAGACTACGACGGTATCTAATCGTCTTCGATCCCCTAACTTTCGTTCTTGATTAATGAAAACATCCTTGGCAAATGCTTTCGCAGTAGTCAGTCTTCAATAAATCCAAGAATTTCACCTCTGACAATTGAATACTAATGCCCCCAACTGTCCCTATTAATCATTACGGCAACCCTAGAAACCAACAAAATAAGAGCCACCGTCCTATTTCATTATTCCAT…	AY124370	348	1.36489e-145	0.93	1	403	0	0	0	0	0	0	0	0	0	0	0	676	0	9	0	0	2	0	0	0	0	0	0	0	0	0	0	0
S1196_0948	Ascomycota	Archaeorhizomycetes	CCCGTGTTGAGTCAAATTAAGCCGCAGGCTCCACTCCTGGTGGTGCCCTTCCGTCAATTCCTTTAAGTTTCGGCCTTGCGACTATACTCCCCCCAGAACCCAAACACTTTGATTTCTCTCAAGGTGCCGATGAAGTCAAATGAAACATTCACCGATCCCTAGTCGGCATAGTTTATGGTTAAGACTACGACGGTATCTGATCGTCTTCGATCCCCTAACTTTCGTTCTTGATTAATGAAAACATCCTTGGCAAATGCTTTCGCAGTAGTTAGTCTTCAATAAATCCAAGAATTTCACCTCTGACAATTGAATACTAATGCCCCCAACTATCCCTATTAATCATTACGGCGGTCTTAGAAACCAACAAAATAAGATCGACG	AY124370	336	2.63893e-140	0.95	1	371	0	0	0	1	13	0	0	0	0	0	0	0	1	8	0	0	0	0	0	0	3	2	3	0	0	0	0	0
S1196_0951	Fungi_other	Fungi_other	CCCCGTGTTGAGTCAAATTAAGCCGCAGGCTCCCATTTACAATTGGATGAAAACCCAAATGTCTCGCAAGCTTTCACTTGAAGCTGGACTATACCTTAAGCCTCAACAAAGAGACCGACCCCCATCTAGTCTCTGAACCTGTCCCATAGAATTTCTTCCTTAGGGCCTTGGCTGCGGATTGTCCATTGTTACATCTTCAGAGTCTGTTACCATACCCGAGGCTATTAACCTGGCCACCTTGCTCTTTCGAGGGCAAGGCTTGGTGTCTGAAGCTTTAGGAGTTTCCCGTCAATTTGAGGGTCTTGCCCATGCGAACATGGACTAGCAATTATATTTAATAGGACAGACCACCTCACCCTTTCAGGCTGCTTTTTGGTGCAGAGCTACTGCGGCTGAGCT…	HQ827184	277	4.26804e-114	0.84	1	440	0	0	0	0	0	0	0	0	0	0	0	0	0	0	0	0	0	0	0	0	0	0	0	0	0	0	0	0
S1196_0952	Entomophthoromycota	Fungi_other	CCCCGTGTTGAGTCAAATTAAGCCGCAGGCTCCACTCCTGGTGGTGCCCTTCCGTCAATTCCTTTAAGTTTCAGCCTTGCGACCATACTCCCCCCGGAACCTAAAAACTTTGATTTCTCTCAGGGTGCCGAACCAGTCATAAAATTAACATGGTCCGATCCCCAGTCGGCATAGTTTATGGTTAAGACTACGACGGTATCTAATCGTCTTCGATCCCCTAACTTTCGTTCTTGATTAATGAAAACATCCTTGGCAAATGCTTTCGCATTAGTCTGTCTCGAGTCGATCCAAGGATTTCACCCCTAACGACCCGATACAAATGCCCCCAACTGTCCCTATTAATCATTACCTTGGTCCTAGAAACCAACAAAATAGAACCCAGG	AF368504	317	6.9504e-132	0.92	1	379	0	4	0	0	0	0	3	0	0	0	0	0	1	0	0	0	0	0	3	0	0	1	0	0	0	0	0	0
S1196_0953	Basidiomycota	Agaricomycetes	CCCCGTGTTGAGTCAAATTAAGCCGCAGGCTCCACTCCTGGTGGTGCCCTTCCGTCAATTCCTTTAAGTTTCAGCCTTGCGACCATACTCCCCCCAGAACCCAAAGACTTTGATTTCTCATAAGGTGCTGGGCGACACATAATAATTGAGGTCGCCCAATCCCTAGTCGGCATAGTTTACTGTTAAGACTACAACGGTATCTAATCGTTTTCGATCCCCTAACCTTCGTTCTTGATTAATGAAAACATCCTTGGCAAATGCTTTCGCAATAGTTGGTCTTGAGTCAATCCAAGAATTTCACCTCTAGCGACTCAATACCAATGCCCCCAACTATCCCTATTAATCATTACGGCGACTCTAGAAACCAACAAAATAGAACCGCACG	HQ832431	375	1.41829e-157	0.98	1	385	2	4	5	8	83	16	12	3	0	9	4	5	590	5	2	24	8	0	2	3	12	16	1	0	0	9	1	5
S1196_0954	Chytridiomycota	Fungi_other	CCCCGTGTTGAGTCAAATTAAGCCGCAGGCTCCACTCCTGGTGGTGCCCTTCCGTCAATTCCTTTAAGTTTCAGCCTTGCGACCATACTCCCCCCGGAACCCAAAAACTTTGATTTCTCATAAGGTGCCGAATGGACAGTGTATTCGATCCATCCGATCCCTAGTCGGCATAGTTTATGGTTAAGACTACGACGGTATCTAATCGTCTTCGATCCCCTAACTTTCGTTCTTGATTAATGGAAACATCCTTGCCAAATGCTTTCGCAGTAGTTTGTCTTTTGCAAGTCCAAGAATTTCACCTCTGGCTGCAAAATACAAATGGCCCCAACTGTTCCTATTAATCATTACCTAGGTCCCAAAAACCAACGAAACAGGAGCCCAAGTCCTATTTTATTATTC…	DQ536490	327	2.763e-136	0.9	1	406	4	71	5	22	63	6	33	9	0	0	3	9	7	2	0	2	217	0	0	0	1	14	4	9	0	0	8	4
S1196_0955		Fungi_other	CCTTGTGTTGAGTCAAATTAAGCCACAGGCTCCACACCTGGTGGTGCCCTTCCATCAGTTTCCAAAGACTTCAATTTCTCATAAGGTGCCAAGCAACATATCATAATTGAGGTTGCCCGATTGCTAGTCAGGATAGTTTACTGTTAAGACCACAACGGTATCTGATCATTTTTGATCCCCTAACCTTCGTTTTTGATTAATGAAAACATCCTTGGCAAACACTTTCGCAATAGTTGGTCTTGGGTCAATCCAAGAATTTCACCTCTAGCAACTCAATGCCAGTGCCCTCAACTATCCCTATTAGTCATTACAGCAACTCTAGAAACCAACAAAATGGAACCACATGTCCTATTTTATTATTCCATGCTA	DQ898721	266	2.6016e-109	0.87	5	369	0	0	0	0	0	0	0	0	0	0	0	0	0	0	0	0	0	0	3	0	0	0	0	0	0	0	0	0
S1196_0957	Basidiomycota	Agaricomycetes	CCCCATGTTGAGTCAAATTAAGCTGCAGGCTCCACACCTGGTGGTGCCCTTCCATCAATTCCTTTAAGTTTCAGCCTTGCGACTATACTTCCCCCAGAACCCAAAGACTTTGATTTCTCATAAGGTGCTGAGCAACACATCATAATTGAGGTTGCCCAATCCCTAGTCAGCACAGTTTACTGTTAAGACTACAATGGTATCTGATTGTTTTCGATCCCCTAACCTTCATTCTTGATTAATGAAAACATCCTTGGCAAATCCTTTTGCAATAGTTGGTCTTGAGTCAATCCAAGAATTTCACCTCTAGCGACTCAATACCAATGCCCCCAACTATCCCTATTAATCATTACGGCAACTCTAGAAACCAACAAAATAGAACCACAGTCCTATTTTATTATT…	DQ457645	368	1.90727e-154	0.95	1	407	0	0	0	0	0	0	0	0	0	0	0	0	0	0	0	0	0	0	0	0	0	0	0	0	0	7	0	0
S1196_0958	Ascomycota	Sordariomycetes	CCCCGTGTTGAGTCAAATTAAGCCGCAGGCTCCACCCCTTGTGGTGCCCTTCCGTCAATTTCTTTAAGTTTCAGCCTTGCGACCATACTCCCCCCAGAACCCAAAAACTTTACTTTCGTGTAAGGTGCCGAACGCGTCAAGAAATAACATCGTCCGATCCCTAGTCGGCATAGTTTATGGTTAAGACTACAACGGTATCTGATCGTTTTCGATCCCCTAACTTTCGTTCCTGATTAATGAAAACATCCTTGGCAAATGCTTTCGCAGTAGTTAGTCTTCAATTGATCCAAGAATTTCACCTCTGACAATTGAATACTGATGCCCCCGACTGTCCCTATTAATCATTACGGCGGTCCTAGAAACCAACAAAATAGAACCGCAACG	AY271802	374	3.92138e-157	0.98	1	384	1699	136	16	26	12	6	6	5	0	5	5	9	5	3	6	7	1	0	2	4	9	8	4	19	2	0	13	3
S1196_0960	Ascomycota	Pezizomycetes	CCCCGTGTTGAGTTAAATTAAGCCGCAGGCTCCACTTGTGGTGGTGCCCTTCCATCAATTCCTTTAAGTTTCAGCCTTGCAACCATACTCCCCCCAGAACCCAAAGACTTTGATTTCTCGTAAGGTGCTAAGCGAGTCAAAATAGAACATCACCCAATCCCTAGTCGGCATAGTTTATGGTTAAAACTACGACGGTATCTGATCGTCTTCGATCCCATAACTTTCGTTTCCTGATTAATGAAAACATCCTTGGCAAATGCTTTTGCAGTAGTTAGTCTTTAATCGATCCAGGAATTTCACCTCTGAAGATTGAATACTGATGCCCCCGACTATCCCTATTAATCATTACAGTGGTCCTAGAAACCAACAACATAGAACTACACG	U62013	348	1.29101e-145	0.95	1	384	0	0	0	0	0	3	0	0	0	0	0	0	0	0	0	0	0	0	0	0	0	0	0	0	0	0	0	0
S1196_0962		Fungi_other	TCCCGTGTTGAGTCAAATTAAGCCGCAGGCTCCACACCTTGTGGTGCCCTTCCGTCAATTCCTTTAAGTTTCAGCCTTGCGACCATACTCCCCCCAGAACCCAAAGACTTTGATTTCTCTGAGGTCATGGACGACTCACGCGAATGAGATCGCTCAAGCCCTAGACGGCATCATTTACTGTTCGGACTACAACGGTATCTAATCGTCTTAGAGCCCCGAACCTTCGTTCTTGATTAATGAAAGCACCCTTGGCAAATGCTTTCGCAGTAGTGAGTCTTGAGACGATCTCTGGATTTCACCCCTCCCGTCTCAATACTAATGCCCCCGATTGCCCCTATTAATCATTACAGCAATCCTAGAAACCAACAAAATAGGACCACCA	U59070	277	3.63003e-114	0.87	2	380	0	0	4	1	0	0	0	0	0	0	0	0	0	0	1	14	0	7	3	8	17	7	3	3	0	1	0	0
S1196_0964	Basidiomycota	Agaricomycetes	CCCCGTGTTGAGTCAAATTAAGCCGCAGGCTCCACACCTGGTGGTGCCCTTCCGTCAATTCCTTTAAGTTTCAGCCTTGCGACCATACTCCCCCCAGAACCCAAAGACTTTGATTTCTCGTAAGGTGCCGAGCTACACATAAATATTGAGTTAGCCCGATCCCTAGTCGGCATAGTTTACTGTTAAGACTACAACGGTATCTGATCGTTTTCGATCCCCTAACCTTCGTTCTTGATTAATGAAAACATCCTTGGCAAATGCTTTCGCAGTAGTCGGTCTTGAGTCAATCCAAGAATTTCACCTCTAGCGACTCAATACCAATGCCCCCAACTATCCCTATTAATCATTACGGCGACTCTAGAAACCAACAAAATAGAACCGCACG	JF706318	379	2.39797e-159	0.99	1	385	19	0	9	1	8	2	0	0	0	0	0	1	10	56	0	0	0	0	0	0	1	0	0	7	0	1	0	0
S1196_0966	Chytridiomycota	Chytridiomycetes	CCCCGTGTTGAGTCAAATTAAGCCGCAGGCTCCACTCCTGGTGGTGCCCTTCCGTCAATTCCTTTAAGTTTCAGCCTTGCGACCATACTCCCCCCGGAACCCAAAAACTTGGATTTCTCTTAAGGTGCCGAACGAGTCACAAATGAAACATCGTCCGATCCCTAGTCGGCATAGTTTATGGTTAAGACTACGACGGTATCTAATCGTCTTCGATCCCCTAACTTTCGTTCTTGATTAATGAAAACATCCTTGGCAAATGCTTTCGCAGAAGTTAGTCTTTCATAAATCCAAGAATTTCACCTCTGACAATTAAATACTAATGCCCCCAACTATCCCTATTAATCATTACATAGGTCCTAGAAACCAACAAAATAGAACCAATGTCCTATTCTATTATTC…	DQ643792	383	4.29786e-161	0.97	1	405	2	0	0	1	2	1	1	0	0	0	1	109	0	2	1	0	0	0	0	0	0	0	0	0	0	2	0	1
S1196_0968	Ascomycota	Fungi_other	CCCCGTGTTGAGTTAAATTAAGCCGCAGGCTCCACGCCTGGTGGTGCCCTTCCGTCAATTTCTTTAAGTTTCAGCCTTGCGACCATACTCCCCCCAGAACCTAACAACTCAATGATTTCTCGCAAGGTGCCGAAGGAGTCGAGTAAAGTACTGCCTCCGATCCCTGGTCGGCATGGTTTACGGTTAAGACTACGACGGTATCTGATCGTCTTCGATCCCCTAACTTTCGTTCACTGATTAATGAAAACGTCCTTGGCGAATGCTTTCGCAGTAGTTAGTCTTCAGCAAATCCAAGAATTTCACCTCTGACAGCCGAATACTGACGCCCCCGACCATCCCTATTAATCATTACGGCGGTCCTAGAAACCAACAAAATAGAACCGCACGTCCTATTTCATT…	FJ358352	355	1.1036e-148	0.94	1	407	0	0	0	2	3	2	0	0	0	0	0	0	1	0	0	0	0	0	0	0	0	0	0	0	0	0	0	1
S1196_0970	Ascomycota	Sordariomycetes	CCCCGTGTTGAGTCAAGTTAAGCCGCAGGCTCCACCCCTGGTGGTGCCCTTCCGTCAATTTCTTTAAGTTTCAGCCTTGCGACCATACTCCCCCCGGAACTCAAGAACTTTGATTTCTCGTAAGGTGCCGAACGAGTCAAATAATAACATCGTCCGATCCCTAGTCAGCATAGTTTATGGTTAAGACTACGACGGTATCTGATCGTCTTCGATCCCCTAACTTTCGTTCCTGATTAATGAAAACATCCTTGGCAAATGCTTTCGCAGTAGTTAGTCTTCAATAAATCCAAGAATTTCACCTCTGACGATTGAATACTGATGCCCCCGACTGTCCCTATTAATCATTACGGCGGTCCTAGAAACCAACAAAATAGAACCACACGTCCTATTCCATTATTC…	FJ358339	389	9.47541e-164	0.98	1	406	1	1	0	0	0	0	7	3	0	0	0	2	4	1	1	0	19	34	29	0	0	1	0	0	0	0	0	0
S1196_0971	Chytridiomycota	Chytridiomycetes	CCCCGTGTTGAGTCAAATTAAGCCGCAGGCTCCACTCCTGGTGGTGCCCTTCCGTCAATTCCTTTAAGTTTCAGCCTTGCGACCATACTCCCCCCGGAACCCAAAAACTTTGATTTCTCATAAGGTGCCGAACGAGTCAATTATTATACTGCGTCCGATCCCCAGTCGGCATAGTTTATGGTTAAGACTACGACGGTATCTGATCGTCTTCGATCCCCTAACTTTCGTTCTTGATTAATGAAAACATCCTTGACGAATGCTTTCGCAGAAGTTAGTCTTTCATAAATCTAAGAATTTCACCTCTGACAATTAAATACTAACGTCCCCAACTATCCCTATTAATCATTACTTCGGTCCTAGAAGCCAACAAAATAAAACCAAAG	FJ848516	361	2.24323e-151	0.97	1	383	46	29	2	79	82	67	23	0	0	0	14	163	111	11	3	24	133	1	0	2	10	12	2	25	2	15	2	3
S1196_0973	Basidiomycota	Agaricomycetes	CCCCGTGTTGAGTCAAATTAAGCCGCAGGCTCCACTCCTGGTGGTGCCCTTCCGTCAATTCCTTTAAGTTTCAGCCTTGCGACCATACTCCCCCCAGAACCCAAAGACTTTGATTTCTCGTAAGGTGCCGAACGACACATCATAAAATAGAGGTCGCCCGATCCCTAGTCGGCATAGTTTACTGTTAAGACTACAACGGTATCTGATCGTTTTCGATCCCCTAACCTTCGTTCTTGATTAATGAAAACATCCTTGGCAAATGCTTTCGCAGTAGTCGGTCTTGAGTCAATCCAAGAATTTCACCTCTAGCGACTCAATACCAATGCCCCCAACTATCCCTATTAATCATTACGGCGACTCTAGAAACCAACAAAATAGAACCGCACG	DQ851574	376	5.14499e-158	0.98	1	387	5	25	39	8	3	1	1	1	0	3	17	4	5	3	0	11	254	0	498	6	6	31	0	7	1	191	12	3
S1196_0975	Basidiomycota	Agaricomycetes	CCCCGTGTTGAGTCAAATTAAGCCGCAGGCTCCACACCTGGTGGTGCCCTTCCGTCAATTCCTTTAAGTTTCAGCCTTGCGACCATACTCCCCCCAGAACCCAAAGACTTTGATTTCTCATAAGGTGCCGAGCGACCCATAAAAAGTGTGGTTCACCCGATCCCTAGTCGGCATAGTTTACTGTTAAGACTACAACGGTATCTGATCGTTTTTGATCCCCTAACCTTCGTCCTTGATTAATGAAAACATCCTTGGCAAATGCTTTCGCACTAGTTGGTCTTGAGTCAATCCAAGAATTTCACCTCTAGCGACTCAATACCAATGCCCCCAACTATCCCTATTAATCATTACGGTGACTCTAGAAACCAACAAAATAGAACCACACGTCCTATTCCATTA…	AY445117	381	3.34277e-160	0.96	1	409	0	0	0	0	0	0	0	0	0	1	0	0	0	0	0	1	0	266	0	0	0	0	0	1	2	182	0	0
S1196_0977	Ascomycota	Pezizomycetes	CCCCGTGTTGAGTCAAATTAAGCCGCAGGCTCCACTCCTGGTGGTGCCCTTCCGTCAATTCCTTTAAGTTTCAGCCTTGCGACCATACTCCCCCCAGAACCCAAAGACTTTGATTTCTCGTAAGGTGCTGACCGGGTCACAAAAGAACACCGGCCAATCCCTAGTCGGCATAGTTTATGGTTAAGACTACGACGGTATCTGATCGTCTTCGATCCCCTAACTTTCGTTCACTGATTAATGAAAACATCCTTGGCAAATGCTTTCGCAGTAGTTAGTCTTCAAATAATCCAAGAATTTCACCTCTGACATTTGAATACTGATGCCCCCGACTATCCCTATTAATCATTACGGTAGTTCTAGAAACCAACAAAATAGAACCACACG	DQ646543	361	2.25e-151	0.97	1	384	0	0	0	0	0	474	3	0	0	0	0	0	0	0	0	0	0	0	0	0	0	0	0	0	0	0	0	0
S1196_0978	Chytridiomycota	Chytridiomycetes	CCCCGTGTTGAGTCAAATTAAGCCGCAGGCTCCACTCCTGGTGGTGCCCTTCCGTCAATTCCTTTAAGTTTCAGCCTTGCGACCATACTCCCCCCGGAACCTAAAAACTTTGATTTCTCATGTGGTGCCGAACAAGTCATTATTGAACATTGTCCGATCCCAAGTCGGCATTGTTTACTGTTGAGACTACGACGGTATCTGATCGTCTTCGATCCCCCAACTTTCGTTCTTGATTAATGAAAACATCCTTGGCGAATGCCTTCGCAGTAGATACTCTTGAGAAAATCCAAGAATTTCACCTCTGACTTCTCAATAGTAACGCCCCCAACTATCCCTATTAATCATTACTTCGGTTTCGAAAACCAACAAAATAAAACCAAAGTCCTATTCCATTATTCC…	AF372719	355	1.0851e-148	0.94	1	404	0	1	0	0	17	0	6	0	0	0	2	331	1	51	13	16	128	0	0	14	4	27	8	0	4	1	0	0
S1196_0979	Ascomycota	Fungi_other	CCCCGTGTTGAGTCAAATTAAGCCGCAGGCTCCACGCCCTGGTGGTGCCCTTCCGTCAATTTCTTCAAGTTTCAGCCTTGCGACCATACTCCCCCCGGAGCCCAAACACTTTGATTTCTCGAAAGGTGCCGAGCGGGTCATGTGGCGACGCCGCCCGATCCCTAGTCGGCACAGTTTATGGTTAAGACTACGACGGTATCTGATCGTCTTCGATCCCCTAACTTTCGTTCCTGATTAATGAAAACATCCTTGGCGAATGCTTTCGCAGTAGTTCGTCTTCAGCCGGTCCAAGAATTTCACCTCTGACGGCTGAATACGGACGCCCCCGACTGTCCCTATCAATCATTACGGCGATCCCAGAAACCAACAAATAGAACCGCGCGTCCTATTCCATTATTC…	DQ346744	349	4.96379e-146	0.93	1	406	0	9	0	0	0	0	0	0	0	0	0	0	0	0	0	0	0	0	0	0	2	0	0	0	0	1	0	0
S1196_0981	Basidiomycota	Agaricomycetes	CCCCGTGTTGAGTCAAATTAAGCCGCAGGCTCCACACCTGGTGGTGCCCTTCCGTCAATTCCTTTAAGTTTCAGCCTTGCGACCATACTCCCCCCAGAACCCAAAGACTTTGATTTCTCGTAAGGTGCCGAGTGACACATAATTGAGTTCACCCGATCCCTAGTCGGCATAGTTTACTGTTAAGACTACAACGGTATCTGATCGTTTTCGATCCCCTAACCTTCGTTCTTGATTAATGAAAACATCCTTGGCAAATGCTTTCGCAGTAGTTGGTCTTGTGTCAATCCAAGAATTTCACCTCTAGCGACACAATACCAATGCCCCCAACTATCCCTATTAATCATTACGGCGACTCTAGAAACCAACAAAATAGAACCACACGTCCTATTTCATTATTCC…	JF706314	385	5.57262e-162	0.97	1	404	2	378	160	1	1	10	126	19	0	855	3	1	3	205	38	212	5	7	36	22	643	51	38	19	26	70	64	0
S1196_0982	Ascomycota	Fungi_other	CCCCGTGTTGAGTCAAATTAAGCCGCAGGCTCCACTCCTGGTGGTGCCCTTCCGTCAATTTCTTTAAGTTTCAGCCTTGCGACCATACTCCCCCCGGAACGCAGAAACTTGTACTTTCGTGTAAGGTGCCAAACGGGTCAAAATATAACACCGTCTGATCCCTAGTTCGCATAGTTTATGGTTAAGACTACGACGGTATCTGATCGTCTTCGATCCCCTAACTTTCGTTCTTGATTAATGAAAACATCCTTGGCAAATGCTTTCGCAATAGTTTGTCTTGCGTAAATCCAAGAATTTCACCTCTAGCAACGCAATACAAATGCCCCCAACTATCCCTATTAATCATTACGGCGACTCTAGAAACCAACAAAATAGAACCGCACGTCCTATTCCATTATT…	AY858665	356	3.93505e-149	0.93	1	406	106	166	17	88	1	17	0	0	0	0	12	2	0	406	13	32	11	0	0	64	154	279	31	64	10	94	13	39
S1196_0983	Basidiomycota	Cystobasidiomycetes	CCCCGTGTTGAGTCAAATTAAGCCGCAGGCTCCACACCATGGTGGTGCCCTTCCGTCAATTCCTTTAAGTTTCAGCCTTGCGACCATACTCCCCCCCGAACCTAGACTTCATGATTTCTCTTCAGGTGCCGAACGAGTCATTATAAACCCTCGTCCGATCCCTAGTCGGCATCGTTTACTGTTAAGACTACAACGGTATCTGATCGTTTTCGATCCCCTAACCTTCGTTCTTGATCAATGAAAACATCCTTGGCAAATGCTTTCGCAGTAGTTCGTCTTCAATAAATCCAAGAATTTCACCTCTAGCAATTGAATACGAATGCCCCCAACTATCCCTATTAATCATTACGGCGATCCTAGAAACCAACAAAATAGGGCCGCACGTCCTATTTTATTATT…	D12803	395	2.08901e-166	0.98	1	407	22	30	0	6	0	0	0	0	0	0	0	0	0	0	0	0	0	0	0	0	0	0	0	0	0	0	2	3
S1196_0984	Chytridiomycota	Chytridiomycetes	CCCCGTGTTGAGTCAAATTAAGCCGCAGGCTCCACTCCTGGTGGTGCCCTTCCGTCAATTCCTTTAAGTTTCAGCCTTGCGACCATACTCCCCCCGGTACCCAAAGACTTTGATTTCTCATAAGGTGCCGAGCGTGTCATGAAATACAACGCCCGATCCCTAGTCGGCATAGTTTACGGTCAGGACTACGACGGTATCTGATCATCTTCGATCCCCTGACTTTCGTTCTTGATTAATGAAAACATCCTTGGCAAATGCTTTCGCAGAAGTTAGTCTTTCATAAATCCAAGAATTTCACCTCTGACTATTAAATACTAATGCCCCCAACTATCCCTATTAATCATTACTTCGGCCCTAGAAACCAACAAAATAAAACCAAAG	DQ536483	381	3.08059e-160	1	1	381	79	0	4	0	0	0	0	0	0	0	221	0	0	78	151	53	11	119	81	9	67	0	19	5	2	23	3	0
S1196_0985	Glomeromycota	Glomeromycetes	CCCCGTGTTGAGTCAAATTAAGCCGCAGGCTCCACCCCTGGTGGTGCCCTTCCGTCAATTTCTTTAAGTTTCAGCCTTGCGACCATACTCCCCCTGGAGCCCAAGCACTTTGATTTCTCATAAGGTGCCAAACAAGTCAAAATATCCTTGCCTGATCCCTAGTCGGCATAGTTTATGGTTAAGACTACGACGGTATCTGATCGTCTTCGATCCCCTAACTTTCGTTCTTGATTAATGAAAACATCCTTGGCAAATGCTTTCGCAGAAGTTAGTCTTTAATAAATCCAAGAATTTCACCTCTGACAATTAAATACTAATGCCCCCAACTATCCCTATTAATCATTACTTCGGTCCTAGAAACCAACAAAATAGAACCAAAGTCCTATTCCATTAATTCCA…	AF229771	387	7.26659e-163	0.98	1	405	0	9	7	0	0	0	5	0	0	0	11	1	9	50	92	17	11	0	1	2	3	19	12	18	16	3	1	0
S1196_0988	Basidiomycota	Agaricomycetes	CCCCGTGTTGAGTCAAATTAAGCCGCAGGCTCCACTCCTGGTGGTGCCCTTCCGTCAATTCCTTTAAGTTTCAGCCTTGCGACCATACTCCCCCCCGAACCCAAAGACTTTGATTTCTCGCAGGGTGCCGAGCGACACATCGAATCGAGGTCGCCCGATCCCCAGTCGGCATAGTTTACTGTTAAGACTACAACGGTATCTGATCGTTTTCGATCCCCTAACCTTCGTTCTTGATTAATGAAAACATCCTTGGCAAATGCTTTCGCAGTAGTTAGTCTTCAGTAAATCCAAGAATTTCACCTCTAGCAACTGAATACTAATGCCCCCAACTATCCCTATTAATCATTACGGCGACTCTAGAAACCAACAAAATAGAACCGCGCG	AF393043	372	3.01578e-156	0.98	1	384	17	10	5	1	3	0	11	1	0	0	15	28	1	18	2	1	10	0	0	0	1	1	17	4	2	2	4	0
S1196_0993	Chytridiomycota	Chytridiomycetes	CCCCGTGTTGAGTCAAATTAAGCCGCAGGCTCCACTCCTGGTGGTGCCCTTCCGTCAATTCCTTTAAGTTTCAGCCTTGCGACCATACTCCCCCCGGAACCCAAAAACTTTGATTTCTCATAAGGTGCCGAACGGGTCATTGTGACGCCGTCCGATCCCTAGTCGGCATAGTTTATGGTAAAGACTACGACGGTATCTGATCGTCTTCGATCCCCTTACTTTCGTTCCCTGATCAATGAAAACATTATTGGCAAATGCTTTCGCAGTAGTCAGTCTTTCCTCAATCCAAGAATTTCACCTCTGACGATTAAATACTAATGCCCCCCACTGTTCCTATTCATCATTACCTCGGTCCTAGAAACCAACAAAATAGAACCACGG	DQ536473	330	1.20402e-137	0.93	1	378	10	38	5	3	0	0	0	0	0	4	27	10	0	12	10	4	62	0	0	2	4	6	0	1	0	5	18	1
S1196_0994	Glomeromycota	Glomeromycetes	TTCCGTATTGTGTCAAATTAAGCCGCAGGCTCCACCCCTGGTGGTGCCCTTCTGTCAATTCCTTTAAGTTTCAGCTTTGCGACCATACTCCCCCCGGAATCCAAACACTTTGGTTTTCCGTAAGGCACCGAATGAGTCATTAAAGAATTAACATCATCCGATCCCTAGTCGGCATAGTTTATGGTTAAGACTACGACGGTATCTGATCGTCTTCGATCCCCTAACTTTCATTCTTGATTAATGAAAACATCCTTGGCAAATGCTTTCGCAGTAGTTAGTCTTCAATAAATCCAAGAATTTCACCTCTGACAATTGAATACTAATGCCCCCAACTATCCCTATTAATCATTACGTCAATTCTAAAAACCAACAAAATAATATCGACG	EU232656	358	4.82762e-150	0.96	3	384	0	0	0	0	0	0	0	0	0	0	0	25	0	0	0	0	0	0	0	0	0	0	0	0	0	0	0	0
S1196_0996	Ascomycota	Dothideomycetes	CCCCGTGTTGAGTCAAATTAAGCCGCAGGCTCCACGCCTGGTGGTGCCCTTCCGTCAATTTCTTTAAGTTTCAGCCTTGCGACCATACTCCCCCCAGAACCCAAAAACTTTGATTTCTCGTAAGGTGCCGGGCGAGTCATAATTGGAACGTCGCCCGATCCCTAGTCGGCATAGTTTACGGTTGAGACTACGACGGTATCTGATCGTCTTCGATCCCCCAACTTTCGTTCACTGATTAATGAAAACATCCTTGGCAAATGCTTTCGCAGTAGTTAGTCTTCAGGCGGTCTAAGAATTTCACCTCTCGCGCCTGAATACTGATGCCCCCGACTGTCCCTATTAATCATTACGGCGGTTCTAGAAACCAACAAAATAGGACCGCACGTCCTATTCAATTAT…	EU940031	381	3.34277e-160	0.96	1	409	11	23	5	26	56	3	61	4	0	2	4	135	179	20	1	3	1	0	0	0	1	10	4	11	0	2	5	9
S1196_0998	Ascomycota	Sordariomycetes	CCCCGTGTTGAGTCAAATTAAGCCGCAGGCTCCACCCCTGGTGGTGCCCTTCCGTCAATTTCTTTAAGTTTCAGCCTTGCGACCATACTCCCCCCAGAACCCAAAGACTTTGATTTCTCGTAAAGTGCCGAACGAGTCAAAATGTAACTTCGTCCGATCCTTAGTCGGCATAGTTTATGGTTAAGACTACGACGGTATCTGATCGTCTTCGATCCCCTAACTTTCGTTCCTGATTAATGAAAACATCCTTGGCAAATGCTTTCGCAGTAGTTAGTCTTCAATAAATCCAAGAATTTCACCTCTGACAATTGAATACTGATGCCCCCGACTGTCCCTATTAATCATTACGGCGGTCCTAGAAACCAACAAAATAGAACCACACGTCCTATTTCATTATTC…	DQ471012	388	2.61287e-163	0.98	1	404	107	503	61	109	216	1	176	20	0	51	72	29	281	239	100	26	12	49	102	14	20	168	54	42	22	147	97	13
S1196_0999	Basidiomycota	Fungi_other	CCCTATGTTGAGTCAAATTAAGCTGCAGGCTCTACTCCTGGTGGTACCCTTCTGTCAATTCCTTTAAGTTTCAGCCTTATGACCATACTCCCCCCAGAACCCAAAGACTTTGATTTCTCATAAGGTGCCGAATGACACATAATATTGAGGTTGTCTGATCCCTAGTTGGCATAGTTTACTGTTAAGACTACAATGGTATCTGATCATTTTCAATCCCCTAACCTTTGTTCTTGATTATTGAAAACATCCTTCGCAAATGCTTTTGCAATAGTTTGTCTTGCATAAATCCAAGAATTTCACCTCTAGCAATGCAATACAAATGCCCCCAACTATCCCTATTAATCATTATGGTGACTCTAGAAACCAACAAAATAGAACCGCACA	AF082845	331	4.38122e-138	0.93	1	383	0	0	0	0	0	0	0	0	0	3	0	0	0	0	0	0	0	0	0	0	0	0	0	0	0	0	0	0
S1196_1000	Entomophthoromycota	Entomophthoromycetes	CCCCGTGTTGAGTCAAATTAAGCCGCAGGCTCCACTCCTGGTGGTGCCCTTCCGTCAATTCCTTTAAGTTTCAGCCTTGCGACCATACTCCCCCCGGAACCCAAAAACTTTGATTTCTCGTAAGGTGCCGATGAAGTCATTAAATGATAACTTTCACCGATCCCTAGTCGGCATAGTTTATGGTTAAGACTACGACGGTATCTGATCGTCTTCGATCCCCTAACTTTCGTTCTTGATTAATGAAAACATCCTTGGCAAATGCTTTCGCAGAAGTTAGTCTTTCCTAAATCCAAGAATTTCACCTCTGACAATTAAATACTAATGCCCCCAACTGTCCCTATTAATCATTACTTTGGTCCTAGAAACCAACAAAATAAGACTAAAG	AF368505	350	1.68373e-146	0.96	1	385	2	0	0	0	0	0	0	1	0	0	2	0	0	4	0	2	3	0	4	0	0	4	2	0	1	1	0	0
S1196_1001	Ascomycota	Pezizomycetes	CCCCGTGTTGAGTCAAATTAAGCCGCAGGCTCCACTCCTGGTGGTGCCCTTCCGTCAATTCCTTTAAGTTTCAGCCTTGCGACCATACTCCCCCCAGAACCCAAAGACTTTGATTTCTCGTAAGGTGCTGAGCGGGTCAAAAAAAGAGTCCACCCAATCCCTAGTCGGCATAGTTTATGGTTAAGACTACGACGGTATCTGATCGTCTTCGATCCCCTAACTTTCGTTCCCTGATTAATGAAAACATCCTTGGCAAATGCTTTCGCAGTAGTTAGTCTTCAATCGATCCAAGAATTTCACCTCTGACGATTGAATACTGATGCCCCCGACTATCCCTATTAATCATTACGGTGGTCCTAGAAACCAACAAAATAGAACCACACG	DQ646530	370	2.31932e-155	0.98	1	384	0	0	0	7	4	111	0	15	0	0	0	0	9	0	8	48	0	31	51	0	0	0	2	0	3	36	0	2
S1196_1003	Chytridiomycota	Chytridiomycetes	CCCCGTGTTGAGTCAAATTAAGCCGCAGGTTCCACCCCTGGTGGTGCCCTTCCGTCAATTTCTTTAAGTTTCAGCGTTGCCGCCATACTCCCCCTGGAGCCCAAGCACTTTGATTTCTCGAAAGGTGCCGAGCGGGTCTAGAAAGAACGCCGCCCGATCCCTAGTCGGCATAGTTTATGGTTAAGACTACGACGGTATCTGATCGTCTTCGATCCCCTAACTTTCGTTCTTGATTAATGAAAACATCCTTGGCAAATGCTTTCGCAGAAGTTAGTCTTTCATAAATCCAAGAATTTCACCTCTGACAATTAAATACTAATGCCCCCAACTATCCCTATTAATCATTACTTCGGTCCTAGAAACCAACAAAATAGAACCAAAG	DQ536490	339	1.24488e-141	0.94	1	382	16	22	7	63	46	6	14	5	0	15	16	120	192	62	3	12	29	0	11	3	19	32	11	2	3	14	9	27
S1196_1009	Ascomycota	Orbiliomycetes	CCCCGTGTTGAGTCAAATTAAGCCGCAGGCTCCACTCCTAAGCAAAAAGGTTAGCATCCAAGAAAAACAAGGGGGAAAAAGGGAAGGGGGGGAAAAAATAACGTACCTGGTGGTGCCCTTCCGTCAATTCCTTTAAGTTTCAGCCTTGCGACCATACTCCCCCCAGAACCCAAAGACTTTGATTTCTCGTAAGGTGCCGAGCGGGTCATAAATTAAACACCGCCCGATCCCTAGTCGGCATAGTTTATGGTTAAGACTACGACGGTATCTGATCGTCTTCGATCCCCTAACTTTCGTTCACTGATTAATGAAAACATCCTTGGCAAATGCTTTCGCAGTAGTTAGTCTTCAATAAATCCAAGAATTTCACCTCTGACAATTGAATACTGATGCCCCCGA…	EF053581	368	2.26431e-154	0.99	106	475	0	135	0	0	0	0	0	0	0	0	0	0	0	0	0	0	0	0	0	0	0	0	0	0	0	0	77	0
S1196_1011	Basidiomycota	Agaricomycetes	CCCCGTGTTGAGTCAAATTAAGCCGCAGGCTCCACTCCTGGTGGTGCCCTTCCGTCAATTCCTTTAAGTTTCAGCCTTGCGACCATACTCCCCCCCGAACCCAAAGACTTTGATTTCTCGTAAGGTGCCGAACGACACATCGAATTGAGGTCGTCCGATCCCTAGTCGGCACGGTTTACTGTTAAGACTACAACGGTATCTGATCGTTTTCGATCCCCTAACCTTCGTTCTTGATTAATGAAAACATCCTTGGCAAATGCTTTCGCAGTAGTCAGTCTTCAGTAAATCCAAGAATTTCACCTCTAGCAACTGAATACTAATGCCCCCAACCGTCCCTATTAATCATTACGGCCGTCCTAGAAACCAACAAAATAGAACCGCACGTCCTATTCTATTATT…	GU187622	379	2.55639e-159	0.96	1	407	3	9	21	2	22	0	5	0	0	0	1	1	0	12	2	5	11	0	0	0	1	13	21	13	4	2	0	0
S1196_1013	Chytridiomycota	Fungi_other	CCCCGTGTTGAGTCAAATTAAGCCGCAGGCTCCACTCCTGGTGGTGCCCTTCCGTCAATTCCTTTAAGTTTCAGCCTTGCGACCATACTCCCCCCGGAACCCAAACACTTTGATTTCTCATAAGGTGCCGATGGGTACGTAACGTATCCCACCGATCCCTAGTCGGCATCGTTTATGGTTAAGACTACGACGGTATCTAATCGTCTTCGATCCCCTAACTTTCGTTCTTGATTAATGAAAACATCCTTGGCAAATGCTTTCGCAGTAGTTAGCCTTGAGCAAATCCAAGAATTTCACCTCTGACTGCTCAATACTAATGCCCCCAACTATCCCTATTAATCATTACTCTGGTCCTAGAAACCAACAAAATAGAACCAAAG	DQ536473	326	7.09957e-136	0.92	1	380	0	0	1	0	0	0	0	0	0	0	0	0	0	0	0	0	0	0	0	0	41	0	0	0	1	0	0	1
S1196_1014	Basidiomycota	Tremellomycetes	CCCCGTGTTGAGTCAAATTAAGCCGCAGGCTCCACACCTGGTGGTGCCCTTCCGTCAATTCCTTTAAGTTTCAGCCTTGCGACCATACTCCCCCCAGAACCCAAAGACTTTGATTTCTCGTAAGGTGCCGAGCTTTTCAAGAATGAAGAAGCCCGATCCCTAGTCGGCATAGTTTACTGTTAAGACTACAACGGTATCTAATCGTTTTTGATCCCCTAACCTTCGTTCTTGATCAATGAAAACGTCCTTGGCAAATGCTTTCGCAGAAGTTAGTCTTCCGTAAATCTAAGAATTTCACCTCTAGCAACGGAATACTAATGCCCCCGACCGTCCCTATTAATCATTACGGCGATCCTAGAAACCAACAAAATAGAACCGCACGTCCTATTCCATTATTCC…	D78323	395	2.07724e-166	0.98	1	405	0	0	0	0	0	0	4	0	0	0	0	0	1	0	0	0	19	0	0	0	0	0	2	0	0	0	0	0
S1196_1015	Ascomycota	Sordariomycetes	CCCCGTGTTGAGTCAAATTAAGCCGCAGGCTCCACCCCTGGTGGTGCCCTTCCGTCAATTTCTTTAAGTTTCAGCCTTGCGACCGTACTCCCCCAAGAACCCAAGAACTTATACTTTCGTGTAAGGTGCCGAGCGGGTCAAAAGATAACACCGCCCGATCCCTAGTCGGCATAGTTTACGGTTAAGACTACGACGGTATCTGATCGTCTTCGATCCCCTAACTTTCGTTCCTGATTAATGAAAACATCCTTGGCGAATGCTTTCGCAGTAGTTAGTCTTCAATAAATCCAAGAATTTCACCTCTGACAATTGAATACTGACGCCCCCGACTGTCCCTATTAATCATTACGGCGGTCCTAGAAACCAACAAAATAGAACCGCGCGTCCTATTTCATTATT…	AY761072	384	1.55418e-161	0.97	1	406	0	0	0	0	2	0	0	0	0	0	0	0	14	50	0	0	0	0	0	0	0	0	0	0	1	0	0	0
S1196_1016	Ascomycota	Fungi_other	TCCCGTGTTGAGTCAAATTAAGCCGCAGGCTCCACGCCTGGTGGTGCCCTTCCGTCAATGTCTTTAAGTTTCAGCCTTGCGACCATACTCCCCCCAGAACCCAAAAACTTTGATTTCTCGTAAGGTGCTCAACGGGTCATAAAAGTAACACCGTCAAATCCCTAGTCGGCATAGTTTATGGTTAAGACTACGACGGTATCTGATCGTCTTCGATCCCCTAACTTTCGTTCACTGATTAATGAAAGCGTTCTTGACAAATGCTTTCGCAGTAGTTTGTCTTCCGCAAATCCAAGAATTTCACCTCTGACAGCGGAATACAGATGCCCCCGTCCGATTCTTTTAGTCATTATCTGCGATTCGAAAACCAACAAAATAGAACCACAAA	JQ301631	319	9.09212e-133	0.92	2	383	0	0	0	0	0	0	0	0	0	0	0	0	0	0	0	0	9	0	0	0	0	0	0	0	0	0	0	0
S1196_1019	Glomeromycota	Glomeromycetes	CCCCATGTTGAGTCAAATTAAGCCGCAAGCTCCACCCCTGGTGGTGCCCTTCCGTCAATTCCTTTAAGTTTCAGCCTTGCGACCATACTCCCTCTGAAACCCAAACACTTTGATTTCCCGTAAGGTGCCGAATGAGTCATTAAAAAATTAACATCATCCGATCTCTAGTCGGCATAGTTTATGGTTAAGACTATGACGGTATCAGTCTGATCGTCTTCGATCCCCTAACTTTCATTCTTGATTAATGAAAACATCCTTAGCAAATGCTTTCACAGTAGTTAGTCTTCAATAAATCCAAGAATTTCACCTCTGACAATTGAATACTAATGCCCCCAACTATCCCTATTAATCATTACGTCAATTCTAGAAACCAACAAAATAGGATTAAACA	AY903702	349	4.75346e-146	0.95	1	390	0	0	0	0	0	0	6	0	0	0	0	0	0	0	0	0	0	0	0	0	0	0	0	0	0	0	0	0
S1196_1020	Chytridiomycota	Chytridiomycetes	CCCCGTGTTGAGTCAAATTAAGCCGCAGGCTCCACTCCTGGTGGTGCCCTTCCGTCAATTCCTTTAAGTTTCAGCCTTGCGACCATACTCCCCCCGGTACCCAAAGACTTTGATTTCTCATAAGGTGCCGAACGGGTCATTAAAACACCGTCCGATCCCTAGTCGGCATCGTTTAAGGTTGAGACTACGACGGTATCTGATCGTCTTCGATCCCCCAACTTTCGTTCTTGATTAATGAAAACATCCTTGGCAAATGCTTTCGCAGAAGTTAGTCTTTCATAAATCCAAGAATTTCACCTCTGACAATTAAATACTAATGCCCCCAACTATCCCTATTAATCATTACTTCGGTCCTAGAAACCAACAAAATAGAACCAAAG	DQ536484	360	6.16452e-151	0.97	1	380	0	1	13	0	0	0	0	0	0	0	25	4	0	6	2	11	4	13	3	0	1	0	4	0	0	2	0	0
S1196_1021	Basidiomycota	Agaricomycetes	TCCCGTGTTGAGTCAAATTGAGCCGCAGGCTCCACACCTGGTGGTGCCCTTCCGTCAATTCCTTTAAGTTTCAGCCTTGCGACCATACTCCCCCCAGAACCCAAAGACTTTGATTTCTCGGAAGGTGCCGAGCAACACATCATAAAGAGGTTGCCCGATCCCTAGTCGGCATAGTTTACTGTTAAGACTACAACGGTATCTGATCGTTTTCGATCCCCTAACCTTCGTTCTTGATTAATGAAAACATTCTTGGCAAATGCTTTCGCAGTAGTTCATCTTCAGTCAATCCAAGAATTTCACCTCTAGCGACTGAATATGAATGCCCCCAACTATCCCTATTAATCATTACGGCAGTTCTAAAAACCAACAAAATAGAACTACACGTCCTATTCCATTATT…	DQ444862	391	1.23208e-164	0.98	2	406	0	0	0	0	0	453	0	0	0	0	0	0	1	2	0	0	1	0	2	0	2	0	0	0	0	0	0	0
S1196_1023	Blastocladiomycota	Fungi_other	CCCCGTGTTGAGTCAAATTAAGCCGCAAGCTCCACTCCTGGTGGTGCCCTTCCGTCAATTCCTTTAAGTTTCAGCCTTGCGACCATACTCCCCCCAGAACCCAAAAACTTTGATTTCTCAAACGGTGCCGGATGCGTCAAATTAAAAATTACAGCATCCGATCCCGGGTCGGCATCGTTTACATTTGGAACTACAAGTGTGTCTAATGCTCTTTGATACTCCAAATATCGTTCTTGATTAATGAAAACATCCTTGACAAATGCTTTCGCAGAAGTTAGTCTTTCCTAAATCCAAGAATTTCACCTCTGACAATTAAATACTAATGCCCCCAACTATCCCTATTAATCATTACTCTAGTTCTAGAAACCAACAAAATAGAACCAAAG	AY821992	313	4.1481e-130	0.91	1	386	0	0	0	0	0	0	0	0	0	0	0	226	0	0	0	0	0	0	0	0	0	0	0	0	0	0	0	0
S1196_1024	Ascomycota	Eurotiomycetes	CCCCGGCAATTTTACGTGGTTCCGCCCTATTTTGGTGCGGATAGCAATTTTTCGGGGCATCACACAACCTTACAAAGGCTTGCTAGAGGCGCAGAGCTGCAGCAATTGACGCCTTGTGGTGCCCTTCCGTCAATTTCTTTAAGTTTCAGCCTTGCGACCATACTCCCCCCAGAACCCATACACTTTGATTTCTCGTAAGGTGCCGAACGGGTCATATAAAAAACACCGTCCGATCCCTAGTCGGCATAGTTTATGGTTAAGACTACGACGGTATCTGATCGTCTTCGATCCCCTAACTTTCGTTCACTGATTAATGAAAACATCCTTGGCGAATGCTTTCGCAGTAGTTAGTCTTCAATAAATCCAAGAATTTCACCTCTGACAATTGAATACTGACGC…	FJ358326	367	6.38353e-154	0.99	109	482	0	0	0	0	0	3	0	0	0	0	0	0	0	0	0	0	0	0	0	0	0	0	0	0	0	0	0	0
S1196_1026	Chytridiomycota	Chytridiomycetes	CCCCGTGTTGAGTCAAATTAAGCCGCAGGCTCCACTCCTGGTGGTGCCCTTCCGTCAATTCCTTTAAGTTTCAGCCTTGCGACCATACTCCCCCCGGAACCCAAAAACTTGAGATTTCTCGTGAGGTGCCGAACGAGTCAAAGATTCAACGTCGTCCGATCCCTAGTCGGCATAGTTTATGGTGAAGACTACAACGGTATCTAATCGTTTTCGATCCCTTCACTGTCGTCCTTGATTAATGAAAACATCCTTGGCAAATGCTTTCGCAGAAGTTAGTCTTTCATAAATCCAAGAATTTCACCTCTGACAATTAAATACTAATGCCCCCAACTGTCCCTATTAATCATTACGGCGACTCTAGAAACCAACAAAATAGAACCGCACG	HQ901716	339	1.2562e-141	0.94	2	380	0	0	0	1	0	6	0	0	0	0	0	16	0	0	0	0	2	0	0	0	0	0	0	5	0	0	0	0
S1196_1027	Glomeromycota	Glomeromycetes	CCCTGTGTTGAGTCAAATTAAGCCGCAGACTTCACCCCTGGTGGTGCCCTTCCGTTAATTCCTTTAAGTTTCAGCCTTGCAACTATACTCCCCCCAGAACCCAAACACTTTGGTTTTCCGTAAGATACTGAATGAGTCATTAAAAAAATTAACATCATCTGATCCCTAGTCGGCATAGTTTATGGTTAAGATTACAATGGTATTTGATTGTTTTCGATCCCCTAACTTTTGTTCTTGATTAATGAAAACATCCTTGGCAAATGCTTTCACAGTAGTTAGTCTTCAATAAATCCAAGAATTTCACCTCTGACAATTGAATACTAATGCCCCAACTATCCCTATTAATCATTACGTCAATCCTAGAAAACCAACAAAATAGGTTCAGTTCAAACG	AY903702	329	3.46076e-137	0.93	1	384	0	0	0	0	0	0	0	0	0	0	0	0	0	0	0	0	0	0	0	0	0	3	0	0	0	0	0	0
S1196_1028	Chytridiomycota	Chytridiomycetes	CCCCGTGTTGAGTCAAATTAAGCCGCAGGCTCCACTCCTGGTGGTGCCCTTCCGTCAATTCCTTTAAGTTTCAGCCTTGCGACCATACTCCCCCCGGAACCCAAAAACTTTGATTTCTCGTAAGGTGCCGATGGAGTCTTTTAAAATAAAACGTCCACCGATCCCTAGTCGGCATCGTTTATGGTTAAGACTACGACGGTATCTGATCGTCTTCGATCCCCTAACTTTCGTTCTTGATTAATGAAAACATCCTTGGCAAATGCTTTCGCAGAAGTTAGTCTTTCCTAAATCCAAGAATTTCACCTCTGACAATTAAATACTAATGCCCCCAACTGTCCCTATTAATCATTACTTCGGTCCTAGAAACCAACAAAATAAAACCAAAGTCCTATTCCATTA…	JN020240	372	3.24287e-156	0.96	1	409	0	0	0	0	11	0	0	1	0	0	5	0	0	0	0	0	0	0	0	0	0	0	2	0	0	0	0	0
S1196_1029	Ascomycota	Pezizomycetes	CCCCGTGTTGAGTCAAATTAAGCCGCAGGCTCCACTCCTGGTGGTGCCCTTCCGTCAATTCCTTTAAGTTTCAGCCTTGCGACCATACTCCCCCCAGAACCCAAAGACTTTGATTTCTCGTAAGGTGCCGAGCGAGTCACGAAAAGTACATCGCCCGATCCCTAGTCGGCATAGTTTATGGTTGAGACTACGACGGTATCTGATCGTCTTCGATCCCTCAACTTTCGTTCCTGATTAATGAAAACATCCTTGGCAAATGCTTTCGCAGTAGTTCGTCTTCAATAAATCCAAGAATTTCACCTCTGACAATTGAATACGGATGCCCCCGACTATCCCTATTAATCATTACGGCGGTCCTAGAAACCAACAAAATAGAACCGCACGTCCTATTTTATTATT…	U53386	399	3.49219e-168	0.99	1	401	110	66	54	380	179	852	497	16	0	2	53	1	75	10	100	129	24	121	35	23	123	100	79	392	47	140	9	117
S1196_1030	Basidiomycota	Agaricomycetes	CCCTGTGTTGAGTCAAATTAAGCCGCAGGCTCCACTCCTGGTGGTGCCCTTCCGTCAATTCCTTTAAGTTTCAACCTTGCGACCATACTCCCCCAGAACCCAAAGACTTTGATTTCTCATAAGGTGCCGAGCGACACATAAGATTGAGTTCGCCCGATCCCTAGTCGGCATAGTTTACTGTTAAGACTACAACGGTATCTGATCGTTTTCGATCCCCTAACCTTCGTTCTTGATTAATGAAAACATCCTTGGCAAATGCTTTCGCAGTAGTTAGTCTTCAGTAAATCCAAGAATTTCACCTCTAGCAACTGAATACTAATGCCCCCAACTATCCCTATTAATCATTACGGCGACTCTAGAAACCAACAAAATAGAACCGCACATCCTATTTTATTATTC…	U59082	394	5.7606e-166	0.98	1	405	0	1	0	0	0	0	0	0	0	0	0	1	7	0	0	1	0	0	0	0	0	6	0	0	1	1	0	0
S1196_1033	Ascomycota	Eurotiomycetes	CCCCGTGTTGAGTCAAATTAAGCCGCAGGCTCCACGCCTTGTGGTGCCCTTCCGTCAATTTCTTTAAGTTTCAGCCTTGCGACCATACTCCCCCCAGAACCCAAAAACTTTGATTTCTCGTAAGGTGCCGAACGCGTCAAAAATGTAACATCGTCCGATCCCTAGTCGGCATAGTTTATGGTTAAGACTACGACGGTATCTGATCGTCTTCGATCCCCTAACTTTCGTTCCCTGATTAATGAAAACATCCTTGGCGAATGCTTTCGCAGTAGTTAGTCTTCCGCAAATCCAAGAATTTCACCTCTGACAGCGGAATACTGACGCCCCCGACTATCCCTATTAATCATTACGGCGGTCCTAGAAACCAACAAAATAGAACCACACG	AY526473	369	6.45129e-155	0.97	1	385	5	14	5	68	25	29	18	104	0	6	23	11	30	14	113	2	3	19	1	139	8	10	244	22	89	20	0	6
S1196_1035	Chytridiomycota	Chytridiomycetes	CCCCGTGTTGAGTCAAATTAAGCCGCAGATTCCACGCCTGGTGGTGCCCTTCCGTCAATTCCTTTAAGTTTCAGCCTTGCGACCATACTCCCCCCGGTACCCAAAGACTTTGATTTCTCATTCGGTGCCGAGCGCGTCATGAAAACAGCGCCCGATCCCGAGTCGGCATGGTTTATGGTTAAGACTACGACGGTATCTGATCGTCTTCGATACCCTAACTTTCGTTCTTGATTAATGAAAACATCCTTGGCAAATGCTTTCGCAGAAGTCAGTCTTCAGTAAATCCAAGAATTTCACCTCTGACAACTGAATACTAATGCCCCCAACTGTCCCTATTAATCATTACCTCGGTCCTGGAAACCAACAAAATAGAACCAAGG	DQ536484	332	1.56081e-138	0.93	1	378	0	5	0	0	0	0	0	8	0	14	0	0	0	12	2	0	14	0	14	0	0	0	0	0	0	0	0	0
S1196_1036	Basidiomycota	Fungi_other	CCCCGTGTTGAGTCAAATTAAGCCACAGGCTCCACTCCTGGTGGTGCCCTTCCATCAATTCCTTTAAGTTTCAGCCTTGCGACCATACTCCCCCCAGAACCTAAAGACTTTGATTTCTCGTAAGGTGCCGAGCGACACATCAAATTGAGGTCACCCGATCCCTAGTCGGCATAGTTTACTGTTAAGACTACAACGGTATCTGATCGTTTTCGATCCCCTAACCTTCGTTCCTGATTAATGAAAACATCCTTGGCAAATGCTTTCGCAGTAGTTAGTCTTCAATAAATCCAAGAATTTCACCTCTGACAATTGAATACTGATGCCCCCGACTGTCCCTATTAATCATTACGGCGGTCCTAGAAACCAACAAAATAGAACCACACG	AF515332	360	6.2397e-151	0.96	1	384	0	0	0	0	0	0	0	0	0	0	0	0	0	2	0	0	0	0	0	0	0	2	0	1	0	4	0	0
S1196_1037	Ascomycota	Fungi_other	CCCCGTGTTGAGTCAAATTAAGCCGCAGGCTCCACCCCTGGTGGTGCCCTTCCGTCAATTTCTTTAAGTTTCATCCTTGCGGACATACTCCCCCTGGAACCCAAACACTTATGATTTCTCGTAATTCGCCGCGCAGGTCAATAAGTAACACTGCGCGATGAATGGTCGGCACAGTTTATGGTTAAGACTACGACGGTATCTGATCGTCTTCGATCCCCTAACTTTCGTTCCTGATTAATGAAAACATCCTTGGCAAATGCTTTCGCAGTAGTTAGTCTTCAATGAATCCAAGAATTTCACCTCTGACAATTGAATACTGATGCCCCCGACTGTCCCTATTAATCATTACGGCGGTCCTAGAAACCAACAAAATAGAACCACACG	AF279399	336	2.67112e-140	0.94	1	384	0	0	0	0	0	0	0	0	0	0	0	0	0	20	0	4	32	0	7	0	0	0	0	0	0	0	0	0
S1196_1042	Ascomycota	Saccharomycetes	CCCCGTGTTGAGTCAAATTAAGCCGCAGGCTCCACTCCTGGTGGTGCCCTTCCGTCAATTCCTTTAAGTTTCAGCCTTGCGACCATACTCCCCCCAGAACCCAAAGACTTGTGCTTTCGCGTAAGGTGCCGAGTGCGTCATTAAATAAAAACAACCACCCGATCCCTAGTCGGCATAGTTTATGGTTAAGACTACGACGGTATCTGATCATCTTCGATCCCCTAACTTTCGTTCTTGATTAATGAAAACGTCCTTGGCAAATGCTTTCGCAGTAGTTAGTCTTCAATAAGTCCAAGAATTTCACCTCTGGCAATTGAATACTGATGCCCCCGACCGTCCCTATTAATCATTACGATGGTCCTAGAAACCAACAAAATAGAACCAAGCGTCCTATTCCAT…	AB071282	382	1.21214e-160	0.97	1	411	0	0	0	0	0	0	0	0	0	0	5	0	0	0	0	0	0	0	0	0	0	0	0	0	0	0	0	0
S1196_1043	Ascomycota	Fungi_other	CCCCGTGTTGAGTCAAATTAAGCCGCAGGCTCCACGCCTTGTGGTGCCCTTCCGTCAATTGCTTTAAGTTTCAATCTTGCGACCGTACTCCCCCCGGAACCCAAAGACTCTGATTTCTCGCAATCTGCCGAACGGGTCAACAAATGCAACACCGTCCGATCGATGGTCGGCATGGTTTATGGTTAAGACTACGACGGTATCTGATCGTCTTCGATCCCCTAACTTTCGTTCACTGATTAATGAAAACGTCCTTGGCAGATGCTTTCGCAGTAGTTGGTCTTGAATGAATCCAAGAATTTCACCTCTGACAATTCAATACCGATGCCCCCGACCGTCCCTATCGATCATTACGGCGGTCCTAGAAACCGACAAAATAGAACCACACG	AY640986	324	5.55988e-135	0.92	1	386	0	0	0	0	0	47	0	0	0	0	0	14	0	0	0	0	0	0	0	0	0	3	0	0	0	0	0	0
S1196_1044	Basidiomycota	Pucciniomycetes	CCCCGTGTTGAGTCAAATTAAGCCGCAGGCTCCACACCTTGTGGTGCCCTTCCGTCAATTCCTTTAAGTTTCAGCCTTGCGACCATACTCCCCCCCGAACCTAAACTCAAAGATTTCTCTTCGGGTGCCGAACGAGTCATAAAAATAAGCCTCGTCCGATCCCCAGTCGGCATCGTTTACTGTTTGGACTACAACGGTATCTAATCGTTTTCGATCCCCAAACCTTCGTTCTTGATCAATGAAAGCATCCTTGGCTAATGCTTTCGCAGTAGTTCGTCTTCGAACAATCCAAGAATTTCACCTCTGACGTTCGAATACGAAAGCCCCCAACTGCCCCTATTCATCATTACGGCGGTCTTGAAGCCAACACAAACAGGACCGCGCG	DQ198784	345	2.76169e-144	0.95	1	385	9	20	12	16	45	9	8	0	0	0	0	0	4	0	0	0	1	0	0	0	0	0	1	3	0	0	10	5
S1196_1046	Chytridiomycota	Fungi_other	CCCCGTGTTGAGTCGAATTAAGCCGCAGGCTCCACTCCTGGTGGTGCCCTTCCGTCAATTCCTTTAAGTTTCAGCCTTGCGACCATACTCCCCCCGGAACCTAAAAACTTTGATTTCTCATAGGGTGCCGAGCCAGGCGTAAGTACCATGGCCCGATCCCCAGTCGGCATAGTTTATGGTTAAGACTACGACGGTATCTAATCGTCTTCGATCCCCTAACTTTCGTTCTTGATTAATGAAAACATCCTTGGCAAATGCTTTCGCATTAGTCTGTCTCGAACCGATCCAAGGATTTCACCCCTAACGATCCGATACAAATGCCCCCAACTGTCCCTATTAATCATTACCTTGGTCCTATAAACCAACAAAATAGAACCACGG	DQ536479	311	3.14239e-129	0.91	1	378	62	0	0	0	1	0	0	0	0	0	2	0	0	0	0	0	0	0	0	0	0	0	0	0	0	0	0	0
S1196_1047	Chytridiomycota	Chytridiomycetes	CCCCGTGTTGAGTCAAATTAAGCCGCAGGCTCCACTCCTGGTGGTGCCCTTCCGTCAATTCCTTTAAGTTTCAGCCTTGCGACCATACTCCCCCCGGTACCCAAAGACTATTGATTTCTCATAGGGTGCCGAACAGGTCATAGCAACGCTGTCCGATCCCCAGTCGGCATAGTTTATGGTCAAGACTACGACGGTATCTGATCGTCTTCGATCCCCTGACTTTCGTTCTTGATTAATGAAAACATCCTTGGCAAATGCTTTCGCAGAAGTTAGTCTTTTATAAATCCAAGAATTTCACCTCTGACAATCAAATACTAATGCCCCCAACTATCCCTATTAATCATTACCTTGGTCCCAGAAACCAACAAAATAGAACCAAAG	DQ536486	342	5.81927e-143	0.95	1	381	0	0	0	0	0	0	0	0	0	0	13	0	0	1	0	4	0	25	14	0	0	0	0	0	0	0	0	0
S1196_1048	Ascomycota	Dothideomycetes	CCCCGTGTTGAGTCAAATTAAGCCGCAGGCTCCACGCCTGGTGGTGCCCTTCCGTCAATTTCTTTAAGTTTCAGCCTTGCGACCATACTCCCCCCAGAACCCAAAGACTTTGATTTCTCGTAAGGTGCCGAGGAGGTCAAAATGATAACACCCCCCGATCCCTAGTCGGCATAGTTTATGGTTAAGACTACGACGGTATCTGATCGTCTTCGATCCCCTAACTTTCGTTCACTGATTAATGAAAACATCCTTGGCAAATGCTTTCGCAGTAGTTTGTCTTCAATAAATCCAAGAATTTCACCTCTGACAATTGAATACAGATGCCCCCGACTATCCCTATTAATCATTACGGCGGTCCTAGAAACCAACAAAATAGAACCACACG	AY628692	381	3.11804e-160	0.99	1	385	25	3	0	3	32	5	5	3	0	2	41	22	39	11	14	0	0	0	0	5	4	5	21	13	2	0	1	2
S1196_1051	Chytridiomycota	Chytridiomycetes	TCCCGTGTTGAGTCAAATTAAGCCGCAGGCTCCACTCCTGGTGGTGCCCTTCCGTCAATTCCTTTAAGTTTCAGCCTTGCGACCATACTCCCCCCGGTACCCAAAGACTTTGATTTCTCATAAGGTGCCGAACGAGTCATGAAACTTCGTCCGATCCCTAGTCGGCATAGTTTATGGTCAAGACTACGACGGTATCTGATCGTCTTCGATCCCCTGACTTTCGTTCTTGATTAATGAAAACATCCTTGGCAAATGCTTTCGCAGAAGTTAGTCTTTCATAAATCCAAGAATTTCACCTCTGACAATTAAATACTAATGCCCCCAACTATCCCTATTAATCATTACTTCGGTCCTAGAAACCAACAAAATAGAACCAAAG	DQ536484	363	2.88159e-152	0.98	2	379	6	68	4	0	0	1	0	1	0	12	11	0	0	28	2	1	128	0	2	0	0	0	0	5	6	2	38	2
S1196_1052	Glomeromycota	Glomeromycetes	TCCCGTGTTGAGTCAAATTAAGCCGCAGGCTCCACCCCTGGTGATGCCCTTCCGTCAATTCCTTTAAGTTTCAGCCTTGCGACCATACTCCCCCCGGAATCCAAACACTTTGGTTTCCTGTAAGGCGCCGAATGAGTCATTATAAAATTAACATCATTCGATCTCTAGTCGGCATAGTTTATGGTTAAGACTACGACGGTATCTGATCATCTTCGATCCCCTAACTTTCGTTCTTGATTAATAAAAACATCCTTGGCAAATGCTTTCGCAGTAGTTAGTCTTCAATAAATCCAAGAATTTCACCTCTGACAATTGAATACTAATGCCCCCAACTATCCCTATTAATCATTACGTCAATCCTAGAAACCAACAAAATAGGTTCGAACGTCCTATTCTATT…	AB555659	386	2.038e-162	0.97	2	409	0	3	0	0	1	1	0	0	0	0	2	0	9	0	0	0	0	0	0	0	0	0	0	0	0	0	0	0
S1196_1053	Basidiomycota	Exobasidiomycetes	CCCCGTGTTGAGTCAAATTAAGCCGCAGGCTCCACTCCTGGTGGTGCCCTTCCGTCAATTTCTTTAAGTTTCAGCCTTGCGACCATACTCCCCCCAGAACCCAAAGACTTTGATTTCTCGTAAGGTGCTGACCGAGTCAAGAAAATAACATCGGCCAATCCCTAGTCGGCATAGTTTACTGTTAAGACTACAACGGTATCTGATCGTTTTCGATCCCCTAACCTTCGTTCTTGATTAATGAAAACATCCTTGGCAAATGCTTTCGCAGAAGTTAGTCTTCACAAAATCCAAGAATTTCACCTCTAGCATGTGAATACTAATGCCCCCAACTATCCCTATTAATCATTACGGCGATTCTAGAAACCAACAAAGTAGAACCGCACGTCCTATTTTATTATT…	DQ789987	392	4.4177e-165	0.98	1	404	0	0	0	0	0	0	0	2	0	2	33	0	9	0	0	0	0	0	0	4	0	5	0	50	0	0	0	0
S1196_1054	Basidiomycota	Agaricomycetes	CCCCGTGTTGATTGTTTACACCTGGTGGTGCCCTTCCGTCAATTCCTTTAAGTTTCAGCCTTGCGACCATACTCCCCCCAGAACCCAAAGACTTTGATTTCTCGTAAGGTGCCGAGCAACACATCAAAATTGAGGTCACCCGATCCCTAGTCGGCATAGTTTACTGTTAAGACTACAACGGTATCTGATCGTTTTCGATCCCCTAACCTTCGTTCTTGATTAATGAAAACATCCTTGGCAAATGCTTTCGCAATAGTTGGTCTTCAGTCAATCCAAGAATTTCACCTCTAGCGACTGAATACCAATGCCCCCAACTATCCCTATTAATCATTACGGCGATTCTAGAAACCAACAAAATAGAACCACACG	GU187647	354	2.70999e-148	0.98	6	369	0	0	0	2	0	0	0	0	0	0	0	5	0	11	0	0	0	0	0	0	0	1	0	0	0	0	0	0
S1196_1055	Ascomycota	Laboulbeniomycetes	CCCCGTGTTGAGTCAAATTAAGCCGCAGGCTCCACGCCTGGTGGTGCCCTTCCGTCAATTTCTTTAAGTTTCAGCCTTGCGACCATACTCCCCCCAGAACCCAAAAACTTTGATTTCTCATAAGGTGCTGAATGGGTCATAACAAAAACACCATCCAATCCCTAGTCGGCATAGTTTACGGTTAAGACTACGACGGTATCTGATCGTCTTCGATCCCCTAACTTTCGTTCCTGATTAATGAAAACATCTTTGACAAATGCTTTCGCAGTAGTTAGTCTTCAATTAATCCAAGAATTTCACCTCTGACAATTGAATACTGATGCCCCCAACTATCCCTATTAATCATTACGGCGGTCCTAGAAACCAACAAAAATAGAACCACGACG	FJ176839	358	4.82762e-150	0.97	1	382	0	11	9	2	0	0	14	3	0	0	0	0	0	0	0	0	0	0	0	2	0	0	6	6	0	3	6	0
S1196_1056	Ascomycota	Saccharomycetes	CCCCGTGTTGAGTCAAATTAAGCCGCAGGCTCCACTCCTGGTGGTGCCCTTCCGTCAATTCCTTTAAGTTTCAGCCTTGCGACCATACTCCCCCCAGAACCCAAAGACTTTGATTTCTCGTAAGGTGCCGAGTGCGTCAAAAAAAGAACAACACCCGATCCCTAGTCGGCATAGTTTATGGTTAAGACTACGACGGTATCTGATCATCTTCGATCCCCTAACTTTCGTTCTTGATTAATGAAAACGTCCTTGGCAAATGCTTTCGCAGTAGTTAGTCTTCAGTAAATCCAAGAATTTCACCTCTGACAACTGAATACTGATGCCCCCGACCGTCCCTATTAATCATTACGATGGTCCTAGAAACCAACAAAATAGAACCATAACG	EU154990	383	4.05435e-161	0.99	1	385	2	1	6	0	47	2	38	0	0	0	7	18	10	11	0	3	1	1	0	1	3	0	3	0	0	23	0	0
S1196_1057	Basidiomycota	Agaricomycetes	CCCCGTGTTGAGTCAAATTAAGCCGCAGGCTCCACTCCTGGTGGTGCCCTTCCGTCAATTCCTTTAAGTTTCAGCCTTGCGACCATACTCCCCCCAGAACCCAAAGACTTTGATTTCTCGTAAGGTGCCGAGTGCCACATAATATTGAGTTCACTCGATCCCTAGTCGGCATAGTTTACTGTTAAGACTACAACGGTATCTGATCGTTTTCGATCCCCTAACCTTCGTTCTTGATAAATGAAAACATCCTTGGCAAATGCTTTCGCAGTAGTTAGTCTTCAGTAAATCCAAGAATTTCACCTCTAGCAACTGAATACTAATGCCCCCAACTGTCCCTATTAATCATTACGGCGACTCTAGAAACCAACAAAATAGAACCGCACG	DQ435797	382	1.12097e-160	0.99	1	384	0	0	0	0	0	0	0	0	0	2	0	2	0	0	0	0	0	0	0	0	2	0	0	2320	17	1	1	0
S1196_1059	Basidiomycota	Agaricomycetes	CCCCATGTTGAGTCAAATTAAGCCACAGGCTCCACACCTGGTGGTGCCCTTCCATCAATTCCTTTAAGTTTCAGCCTTGCGACCATACTCCCCCCAGAACCCAAAGACTTTGATTTCTTGCAAGGTGCTGAGCAACACATCATAATTGAGGTTGCCCGATCCCTAGTCGGCATAGTTTACTGTTAAGACTACAATGGTATCTGATCGTTTTCAATCCCCTAACCTTCATTCTTAATTAATGAAAACATCCTTGGCAAATGCTTTCACAATAGCTGGTCTTGAGTCAATCCAAGAATTTCACCTCTAGCGACTCAATACCAATTCCCCCAACTATCCCTATTAATCATTACAGCGACTCTAGAAACCAACAAAATAGAACTGCACG	KJ137260	355	1.02653e-148	0.96	1	385	0	0	0	0	0	0	0	0	0	0	0	0	0	0	0	0	0	0	110	0	0	26	0	0	0	0	0	0
S1196_1060	Chytridiomycota	Chytridiomycetes	CCCCGTGTTGAGTCAAATTAAGCCGCAGGCTCCACACCTGGTGGTGCCCTTCCGTCAATTCCTTTAAGTTTCAGCCTTGCGACCATACTCCCCCCGGTACCCAAAGACTTTGATTTCTCATAAGGTGCCAAACGGGTCTAATAGACTTCGTCTGATCCCTAGTCGGCATAGTTTATGGTCAAGACTACGACGGTATCTGATCGTCTTCGATCCCCTGACTTTCGTTCTTGATTAATGAAAACATCCTTGGCAAATGCTTTCGCAGAAGTTAGTCTTATATAAATCCAAGAATTTCACCTCTGACAATTTAATACTAATGCCCCCAACTATCCCTATTAATCATTACTTCGGTCCTAGAAACCAACAAAATAGAACCAAAGTCCTATTCCATTATTCCAT…	DQ536484	369	6.80001e-155	0.95	1	403	0	0	0	0	0	0	0	0	0	0	7	0	0	1	1	2	0	0	0	0	0	2	2	0	0	3	0	0
S1196_1062	Basidiomycota	Agaricomycetes	CCCTGTGTTGAGTCAAATTAAGCTGCAGGCTCCATGCCTGGTGGTGCCCTTCCATCAATTCCTTTAAGTTTCAGCCTTGCAACCATACTCCCCCCAGAACCCAAAGACTTTGATTTCTCATAAGGTGCCAAGCGACACATGATAGTGAGATCGCCCGATCCCTAGTCGGCATAGTTTACTGTTAAGACTACAACAGTATCTGATCGTTTTCAATCCCCTAACCTTCGTTCTTGATTAATGAAAACATCCTTGGCAAATGCTTTCACAGAAGTTAGTCTTCCATAAATCCAAGAATTTCACCTCTAGCAACGGAATACTAATGCCCCCAACTATCCCTATTAATCATTACTGCGGCTCTAAAAACCAACAAAATAGAACCGCACG	DQ521407	354	2.83822e-148	0.97	9	384	0	0	0	14	0	0	0	0	0	0	0	0	0	0	0	0	0	0	0	0	0	2	0	4	2	0	0	4
S1196_1063	Ascomycota	Laboulbeniomycetes	CCCCGTGTTGAGTCAAATTAAGCCGCAGGCTCCACGCCTGGTGGTGCCCTTCCGTCAATTTCTTTAAGTTTCAGCCTTGCGACCATACTCCCCCCAGAACCCAAAAACTTTGATTTCTCATAAGGTGCCAAGTGAGTCATAAAAAAATACTACACCTGATCCCTAGTCGGCATAGTTTACGGTTAAGACTACGACGGTATCTGATCGTCTTCGATCCCCTAACTTTCGTTCCTGATTAATGAAAACATCTTTGGCAAATGCTTTCGCAGTAGTTAGTCTTCAATAAATCCAAGAATTTCACCTCTGACAATTGAATACTGATGCCCCCAACTATCCCTATTAATCATTATGGTGGTCCTAGAAACCAACAAAATAGGTCCACACA	FJ176839	358	4.81316e-150	0.96	1	384	0	28	0	0	0	0	0	0	0	0	0	0	0	0	0	0	0	0	0	0	0	0	0	0	0	0	2	0
S1196_1067	Ascomycota	Fungi_other	CCCCGTGTTGAGTCAAATTAAGCCGCAGGCTCCACCCCTGGTGGTGCCCTTCCGTCAATTTCTTTAAGTTTCAGTATTGCTACCGTATTTCCCCAGAATAAGCTCTTATACTTTCGTGTAAGGTGCCGGACGGGGCAAATAGAACCACCGTCCGATCCCTAGACTTAATAGTTTACGGTTAAGACTACGACGGTATCTGATCGTCTTCGATCCCCTAACTTTCGTTCCTGATTAATGAAAACATCCTTGACGAATGCCTTCGCAGTAGTTAGTCTTCAATAAATCCAAGAATTTCACCTCTGACAATTGAATACTGACGCCCCCGACTGTCCCTATTAATCATTACGGCGGTCCTAGAAACCAACAAAATAGAACCACACGTCCTATTTCATTATTCCA…	EU367462	342	6.22609e-143	0.92	1	402	0	0	0	0	0	3	0	0	0	0	0	0	60	0	0	0	0	0	0	0	0	1	0	0	0	0	0	0
S1196_1071	Basidiomycota	Agaricomycetes	TCCCGTGTTGAGTCAAATTAAGCCGCAGGCTCCACACCTGGTGGTGCCCTTCCGTCAATTCCTTTAAGTTTCAGCCTTGCGACCATACTCCCCCCGGAACCCAAAAACTTTGATTTCTCGTAAGGTGCCGAGCGATACATCAAGTGAGGTCGCCCGATCCCTAGTCGGCATAGTTTACTGTTAAGACTACAACGGTATCTGATCGTTTTCGATCCCCTAACCTTCGTTCTTGATTAATGAAAACATCCTTGGCAAATGCTTTCGCAGTAGTTGGTCTTGAATCAATCCAAGAATTTCACCTCTAGCGACTCAATACCAATGCCCCCAACTATCCCTATTAATCATTACAGCGATTCTAGAAACCAACAAAATAGAACCGCATG	DQ459373	361	2.24323e-151	0.97	2	381	993	139	28	31	61	12	15	1	0	1	44	65	453	68	49	6	4	14	0	2	3	70	83	2	5	40	12	14
S1196_1072	Chytridiomycota	Chytridiomycetes	CCCCGTGTTGAGTCAAATTAAGCCGCAGGCTCCACTCCTGGTGGTGCCCTTCCGTCAATTCCTTTAAGTTTCAGCCTTGCGACCATACTCCCCCCGGAACCCAAAAACTTTGATTTCTCATAAGGTGCCGAATGCATAGAAATGCATCCGATCCCTAGTCGGCATAGTTTATGGTTAAGACTACGACGGTATCTAATCGTCTTCGATCCCCTAACTTTCGTTCTTGATTAATGAAAACATCCTTGGCAAATGCTTTCGCAGTAGTTTGTCTTTGAAAAATCCAAGAATTTCACCTCTGACAATCAAATACAAATGCCCCCAACTGTTCCTATTAATCATTACCGGTTCCATAAACCAACAAAACAAAACCAAG	HQ901774	317	6.74042e-132	0.93	1	373	2	48	4	0	0	0	0	0	0	0	0	0	0	0	0	0	0	0	0	0	0	0	0	0	0	0	4	0
S1196_1074	Ascomycota	Dothideomycetes	CCCCGTGTTGAGTCAAATTAAGCCGCAGGCTCCACTCCTGGTGGTGCCCTTCCGTCAATTTCTTTAAGTTTCAGCCTTGCGACCATACTCCCCCCAGAACCCAAAAACTTTGATTTCTCGTAAGGTGCCGATCGGGTCAATAAAAAAACACCGACCGATCCCTAGTCGGCATAGTTTATGGTTAAGACTACGACGGTATCTATTTTAATTGTTAGTGAAAATTCAAATAATAAAATTGACAGCTTGCTGTCAGACACAAAACTTACCTGATCGTCTTCGATCCCCTAACTTTCGTTCACTGATTAATGAAAACATCCTTGGCAAATGCTTTCGCAGTAGTTAGTCTTCAGCAAATCCAAGAATTTCACCTCTGACAGCTGAATACTAGTGCCCCCGACT…	GU561841	337	1.22272e-140	0.87	2	475	5	7	17	4	0	2	2	0	0	2	9	1	0	5	14	5	0	0	0	0	3	9	0	29	2	3	0	5
S1196_1079	Basidiomycota	Agaricomycetes	CCCCGTGTTGAGTCAAATTAAGCCGCAGGCTCCACTCCTGGTGGTGCCCTTCCGTCAATTCCTTTAAGTTTCAGCCTTGCGACCATACTCCCCCCAGAACCCAAAGACTTTGATTTCTCGGCGAGGTGCCGAGCGACACATCAAAGAGAGGTCGCCCGATCCCTAGTCGGCATCGTTTACTGTTAAGACTACAACGGTATCTGATCGTTTTCGATCCCCTAACCTTCGTTCTTGATTAATGAAAACATCCTTGGCAAATGCTTTCGCAGTAGTTCGTCTTCGGTCGATCCAAGAATTTCACCTCTAGCGACCGAATACGAATGCCCCCGACTGTCCCTATCGATCATTACGGCGACTCTAGAAACCAACGAAATAGAACCGCGCG	DQ534675	355	1.02653e-148	0.96	1	385	0	1	0	0	0	0	0	1	0	0	0	2	0	0	0	81	2	0	0	2	1	79	3	0	0	0	0	0
S1196_1080	Olpidiomycota	Olpidiomycetes	CCCCGTGTTGAGTCAAATTAAGCCGCAGGCTCCACACCTGGTGGTGCCCTTCCGTCAATCCCTTTAAGTTTCAGCCTTGCGACCATACTCCCCCCAGAACCCAAAAACTTTGATTTCTCATAAGGTGCCGAGCGAGTCATCAAATTAACATCGCCCGATCCCTAGTCGGCATAGTTTATGGTTAAGACTACGACGGTATCTGATCGTCTTCGATCACCTAACTTTCGTTCTTGATTAATGAAAACATCCTTGGCAAATGCTTTCGCACTAGTTAGTCTTCAATAAATCCAAGAATTTCACCTCTGACAATTGAATACTAATGCCCCCAACTGTCCCTATTAATCATTACGGCGGTCCTAGAAACCAACAAAATAGAACCACACG	AY987433	358	4.79871e-150	0.96	1	384	1	0	2	1	5	12	0	0	0	2	1	4	2	3	5	1	0	0	0	0	1	3	0	0	0	0	0	0
S1196_1082	Ascomycota	Dothideomycetes	CCCCGTGTTGAGTCAAATTAAGCCGCAGGCTCCACGCCTGGTGGTGCCCTTCCGTCAATTTCTTTAAGTTTCAGCCTTGCGACCATACTCCCCCCAGAATCCAAACGCTTTGATTTCTCGTAAGGTGCCGATGGAGTCAAAATAAAAACATCCACCGATCCCTAGCTGACATTGTTTACGGTTAAGACTACGACGGTATCTGTTATTTGCGTTAGCGAAATGTTCACAAAAATTTCATTGTGCAAAAAGATGTTTCACAACTTACCTGATCGTCTTCGATCCCCTAACTTTCGTTCACTGATTAATGAAAACATCCTTGGCAAATGCTTTCGCAGTAGTTAGTCTTCGGCAAATCCAAGAATTTCACCTCTGACAGCTGAATACTAGTGCCCCCGACTG…	GU296175	260	1.56586e-106	0.86	99	473	0	13	11	1	0	0	0	0	0	0	10	1	0	0	0	0	0	0	0	0	0	0	0	5	0	0	4	0
S1196_1083	Ascomycota	Leotiomycetes	CCCCGTGTTGAGTCAAATTAAGCCGCAGGCTCCACTCCTGGTGGTGCCCTTCCGTCAATTTCTTTAAGTTTCATCATTGCTGACGTACTCCCCCCAGAACCCAAAGACTTTGATTTCTCGTAAGGTGCCGAGCGAGTCAAAAGAAAACATCGCCCGATCCCTAGTCGGCATAGTTTATGGTTAAGACTACGACGGTATCTGATCGTCTTCGATCCCCTAACTTTCGTTCACTGATTAATGAAAACATCCTTGGCAAATGCTTTCGCAGTAGTTAGTCTTCAATAAATCCAAGAATTTCACCTCTGACAATTGAATACTGATGCCCCCGACTATCCCTATTAATCATTACGGCGGTCCTAGAAACCAACAAAATAGAACCACACG	DQ002903	367	4.94654e-154	0.97	1	384	0	23	0	0	0	0	0	0	0	3	34	0	0	7	0	0	0	0	13	0	0	0	0	9	10	0	0	0
S1196_1084	Basidiomycota	Agaricostilbomycetes	CCCCGTGTTGAGTCAAATTAAGCCGCAGGCTCCACTCCTGGTGGTGCCCTTCCGTCAATTCCTTTAAGTTTCAGCCTTGTGACCGTACTCCCCCACGAACCGCACTCAAGATTTCTCTTTGGCTGCAGATGAGGTCATTAAGAAAACCCTCACCCATCGCCGGTTGGCATAGTTTACTGTCGAGACTACAACGGTATCTAATCGTTTTCGATCCCCCGACCTTCGTTCTTGATCAATGAAAGCGTCCTTGGCAAATGCTTTCGCAATAGTTTGTCTTCAATAAATCCAAGAATTTCACCTCTAGCAATTGAATACAAATGCCCCCGAGCCGCCCCTATTCCTCATTAAGGTGCCTCTAAAAGACCAATAGAGGCACACA	JN020243	365	3.7469e-153	0.98	1	379	0	0	0	15	6	0	0	0	0	0	0	0	1	0	0	0	0	0	3	1	0	0	0	0	4	14	0	12
S1196_1088	Ascomycota	Fungi_other	CCCCGTGTTGAGTCAAATTAAGCCGCAGGCTCCACTCCTGGTGGTGCCCTTCCGTCAATTTCTTTAAGTTTCAGCCTTGCGACCATACTCCCCCCAGAACCCAAAAACTTTGATTTCTCGTAAGGTGCGTAACGGGTCAAAATAGGAACACCGTCACATCCCTAGTCGGCATAGTTTATGGTTAAGACTACGACGGTATCTATGAATTGAAATTAGCACAATAATTTTTAGAATTTAGATTTAGTTAGCCACAATTTACTAATCGATCTCAAGATCGATTCATTAAATTGGACTAAGAAAATTTGACTTACCTGATCGTCTTCGATCCCCTAACTTTCGTTCACTGATTAATGAAAACATCCTTGGCAAATGCTTTCGCAGTAGTTAGTCTTCAGTAAA…	DQ986709	188	1.29567e-74	0.96	1	202	0	0	0	0	0	0	0	0	0	0	0	0	1	1	8	0	1	0	2	0	0	0	0	6	0	1	0	0
S1196_1089	Ascomycota	Sordariomycetes	CCCCGTGTTGAGTCAAATTAAGCCGCAGGCTCCACCCCTGGTGGTGCCCTTCCGTCAATTTCTTTAAGTTTCAGCCTTGCGACCATACTCCCCCAGGAACTCGAAAACTTTACTTTCGTGTAAGGCGCCGAACGAGTCAATTGAAACATCGTCCGATTCCTAGTCAGCATAGTTTATAGTTAAGACTACGACGGTATCTGATCGTCTTCGATCCCCTAACTTTCGTTCCTGATTAATGAAAACATCCTTGGCAAATGCTTTCGCAGTAGTTAGTCTTCAATAAATCCAAGAATTTCACCTCTGACAATTGAATACTGATGCCCCCGACTGTCCCTATTAATCATTACGGCGACTCTAGAAACCAACAAAATAGAACCGCACG	AY526478	351	6.01676e-147	0.96	1	382	0	0	0	0	0	0	0	0	0	0	0	0	0	0	0	0	0	55	58	0	3	0	4	0	0	0	0	0
S1196_1090	Ascomycota	Fungi_other	CCCCGTGTTGAGTCAAATTAAGCCGCAGGCTCCACGCCTGGTGGTGCCCTTCCGTCAATTTCTTTAAGTTTCAGCCTTGCGACCATACTCCCCCCATAACCTGACTTTGATTTCTCGTAAGGTGCCGATGGAGTCAAAAAAGCAACATCCACCGATCCCTAGGCGGCATAGTTTATGGTTAAGACTACGACGGTATCTGATCGTCTTCGATCCCCTAACTTTCGTTCACTGATTAATGAAAACGTCCTTGGCGAATGCTTTCGCAGTAGTTAGTCTTCAATAAATCCAAGAATTTCACCTCTGACAATTGAATACTGACGCCCCCGACCGTCCCTATTAATCATTACGGCTCACCTAGAAACCAACAAAATAGGAGAGCCGTCCTATTTCATTATTCCA…	DQ104807	359	1.83463e-150	0.94	1	404	1	0	0	1	31	0	9	0	0	3	0	18	17	1	0	0	0	0	0	0	3	1	0	3	0	0	0	0
S1196_1091	Basidiomycota	Agaricomycetes	CCCCGTGTTGAGTCAAATTAAGCCGCAGGCTCCACTCCTGGTGGTGCCCTTCCGTCAATTCCTTTAAGTTTCAGCCTTGCGACCATACTCCCCCCAGAACCCAAAGACTTTGATTTCTCGTAAGGTGCTGAGTGACACATGAAAGTGAGATCACTCAATCCCTAGTCGGCATAGTTTACTGTTAAGACTACAACGGTATCTGATCGTTTTCGATCCCCTAACCTTCGTTCTTGATTAATGAAAACATCCTTGGCAAATGCTTTCGCAGAAGTTAGTCTTCCGTAAATCCAAGAATTTCACCTCTAGCCACGGAATACTAATGCCCCCAACTATCCCTATTAATCATTACGGCGACTCTAGAAACCAACAAAATAGAACCGCACG	EU215396	366	1.37177e-153	0.97	1	384	0	0	8	364	0	1	0	0	0	28	1	0	2	1	0	19	1	0	0	2	44	3	0	2	0	6	1	91
S1196_1092	Entomophthoromycota	Entomophthoromycetes	CCCCGTGTTGAGTCAAATTAAGCCGCAGGCTCCACTCCTGGTGGTGCCCTTCCGTCAATTCCTTTAAGTTTCAGCCTTGCGACCATACTCCCCCCAGAACCCAAAAACTTTGATTTCTCGTAAGGTGCCGATGAAGTCATATTTTAATTTCAACTTTCACCGATCCCTAGTCGGCATCGTTTATGGTTAAGACTACGACGGTATCTGATCGTCTTCGATCCCCTAACTTTCGTTCTTGATTAATGAAAACATCCTTGGCAAATGCTTTCGCAGAAGTTAGTCTTTAATAAATCCAAGAATTTCACCTCTGACAATTAAATACTAATGCCCCCAACTGTCCCTATTAATCATTACTTTGGTCCAAAGAAACCAACAAAAAATAGGTCCAAAG	AF368505	330	1.24061e-137	0.93	1	391	0	0	0	0	0	0	0	0	0	0	0	0	0	0	0	6	0	0	0	0	38	0	0	0	0	2	0	0
S1196_1094	Ascomycota	Pezizomycetes	CCCCGTGTTGAGTCAAATTAAGCCGCAGGCTCCACTCCTGGTGGTGCCCTTCCGTCAATTCCTTTAAGTTTCAGCCTTGCGACCATACTCCCCCCAGAACCCAAAGACTTTGATTTCTCGTAAGGTTCCGAGAGAGGCAAAATTAAACCATCCCCCGATCCCTAGTCGGCATAGTTTATGGTTGAGACTACGACGGTATCTGATCGTCTTCGATCCCTCAACTTTCGTTCCTGATTAATGAAAACATCCTTGGCAAATGCTTTCGCAGTAGTTCGTCTTCAAAAAATCCAAGAATTTCACCTCTGACATTTGAATACGGATGCCCCCGACTATCCCTATTAATCATTACGGCGGTCCTAGGAACCAACGAAATAGAACCGCACG	U62012	364	1.05498e-152	0.97	1	384	0	1	0	0	0	0	0	0	0	0	0	0	45	0	0	0	0	0	0	0	0	0	0	0	0	0	0	0
S1196_1096	Glomeromycota	Glomeromycetes	CCCCGTGTTGAGTCAAATTAAGCCGCAGGCTCCACTCCTGGTGGTGCCCTTCCGTCAATTCCTTTAAGTTTCAGCCTTGCGACCATACTCCCCCCGGTACCCAAAGACTTTGATTTCTCATAAGGTGCCAAACAGGTCAGTGTGACACTGTCTGATCCCTAGTCGGCATAGTTTATGGTCAAGACTACGACGGTATCTGATCGTCTTCGATCCCCTGACTTTCGTTCTTGATTAATGAAAACATCCTTGGCAAATGCTTTCGCAGAAGTTAGTCTTTAATAAATCCAAGAATTTCACCTCTGACAATTAAATACTAATGCCCCCAACTGTCCCTATTAATCATTACTTCGGTCCTAGAAACCAACAAAATAGAACCAAGG	AF229771	350	1.65845e-146	0.96	1	378	0	4	0	0	0	0	0	0	0	0	0	0	0	0	0	2	0	0	0	0	0	0	0	0	0	0	0	0
S1196_1098	Ascomycota	Fungi_other	CCCCGTGTTGAGTCAAATTAAGCCGCAGGCTCCACGCCTGGTGGTGCCCTTCCGTCAATTTCTTTAAGTTTCAGCCTTGCGACCATACTCCCCCCAGAACCCAAAAGCTTTGATTTCTCGTAAGGCGCCGAGCGAGTCAAAATAGCAACATCGCCCGATTCCTAGCCGGCATCGTTTACTGTTGAGATTACGACGGTATCTGATCGTCTTCAATCCCCCAACTTTCGTTCACTGATTAATGAAACCATCCTTGGCGAATGCTTTCGCAGTAGTTAGTCCTCCGCGAATCCAAGAATTTCACCTCTGACCGCGGCTGTGGCGTTGTTAGTAATAGTAGAAACTGCGGTACAAGTGTAACTTACAATCCTAGCGCCCCCGACTGGCCCTATTAATCATTAA…	U42484	274	9.44242e-113	0.94	1	308	0	0	0	0	0	0	0	3	0	0	2	0	0	0	0	0	0	0	0	0	0	0	0	0	0	0	1	0
S1196_1099	Chytridiomycota	Chytridiomycetes	CCCCGTGTTGAGTCAAATTAAGCCGCAGGCTCCACTCCTGGTGGTGCCCTTCCGTCAATTCCTTTAAGTTTCAGCCTTGCGACCATACTCCCCCCGGAACCCAAAAACTTTGATTTCTCGGAAGGTGCCGATGGCGTCAGATAAAACGAACAGCCACCGATCCCTAGTCGGCATAGTTTATGGTTAAGACTACGACGGTATCTAATCGTCTTCGATCCCCTAACTTTCGATCTTGATTAATGAAAACATCCTTGGCAAATGCTTTCGCAGAAGTTAGTCTTTCATAAATCCAAGAATTTCACCTCTGACAATTAAATACTAATGCCCCCAACTATCCCTATTAATCATTACTTCGGTCCCAAAAACCAACAAAACAGCACCAAAG	JN020240	347	3.59099e-145	0.95	1	385	0	0	0	0	0	0	0	0	0	0	3	0	0	0	1	0	0	1	4	0	3	0	5	6	2	13	0	0
S1196_1100	Basidiomycota	Agaricomycetes	CCCCGTGTTGAGTCAAATTAAGCCGCAGGCTCCACACCTGGTGGTGCCCTTCCGTCAATTCCTTTAAGTTTCAGCCTTGCGACCATACTCCCCCCAGAACCCAAAGACTTAAAGATTTCTCGTAGGGTGCCGGGCAACACATCATAGATAGAGATTGCCCGATCCCCAGTCGGCATAGTTTACTGTTAAGACTACAACGGTATCTGATCGTTTTCGATCCCCTAACCTTCGTTCTTGATTAATGAAAACATCCTTGGCAAATGCTTTCGCACTAGTCGGTCTTGAGTCAATCCAAGAATTTCACCTCTAGCGACTCAATACCAATGCCCCCAACTATCCCTATTAATCATTACGGCGGAACTAGAAACCAACAAAATAGAACCGCAAACG	U23544	353	8.01318e-148	0.96	1	386	0	0	0	0	0	0	0	0	0	8	0	0	0	0	0	0	0	0	0	0	0	0	0	0	0	0	0	0
S1196_1101	Entomophthoromycota	Entomophthoromycetes	TCCCGTGTTGAGTCAAATTAAGCCGCAGGCTCCACTCCTGGTGGTGCCCTTCCGTCAATTCCTTTAAGTTTCAGCCTTGCGACAGTACTCCCCCCAGAACCCAAAAACTTTGATTTCTCATACGGTGCCGATCAATGCATTGAATACATTTGACCGATCCCGAGTCGGCATAGTTTATGGTTAAGACTACGACGGTATCTAATCGTCTTCGATCCCCTAACTTTCGTTCTTGATTAATGAAAACATCCTTGACAAATGCTTTCGCAGTAGTTAGTCTTTCAGAAATCCAAGAATTTCACCTCTAGCACTGAAATACTAATGTCCCCAACTGTCCCTATTAATCATTACCTTGGTCCTAGAAACCAACAAAATAGAACCAAAA	AF368505	336	2.65502e-140	0.94	2	381	0	0	0	0	0	0	20	0	0	0	1	0	0	0	6	0	0	43	4	0	0	1	0	5	0	0	0	0
S1196_1102	Ascomycota	Lecanoromycetes	CCCCGTGTTGAGTCAAATTAAGCCGCAGGCTCCACGCCATTGTGGTGCCTTTCCGTCAATTTCTTTAAGTTTCAGCCTTGCGACCATACTCCCCCCAGAACCCAAACACTTTGATTTCTCGTAAGGCGCCGAACGGGTCAAGTAAATAACACCGTCCGATTCCTAGTCGGCATAGTTTATGGTTAAGACTACAACGGTATCTGATCGTTTTCGATCCCCTAACTTTCGTTCACTGATTAATGAAAACATCCTTGGCAAATGCTTTCGCAGTAGTTGGTCTTCAATAAATCCAAGAATTTCACCTCTGACAATTGAATACCGATGCCCCCGACTATCCCTATTAATCATTACGGCGGTCCTAGAAACCAACAAAATAGAACCGCACG	AF491848	360	6.27729e-151	0.96	1	386	0	0	0	0	0	0	0	3	0	1	0	0	0	0	2	0	0	0	0	2	0	0	0	6	1	0	0	0
S1196_1107	Chytridiomycota	Chytridiomycetes	CCCCGTGTTGAGTCAAATTAAGCCGCAGGCTCCACTCCTGGTGGTGCCCTTCCGTCAATTCCTTTAAGTTTCAGCCTTGCGACCATACTCCCCCCGGAACCCAAAAACTTCTGATTTCTCATAAAGTGCCAAACGAGTCAAAAAAATAACATCGCCTGATCCTTAGTCGGCATAGTTTATGGTTAAGACTACGACGGTATCTGATCGTCTTCGATCCCCTAACTTTCGTGCTTGATTAATGAGAACATCCTTGACGAATGCTTTCGCAGAAGTTAGTCTTCCACAAATCCAAGAATTTCACCTCTGACTGTGGAATACTAACGTCCCCAACTGTCTCTATTAATCATTACTTTGTTCCTGAAAACCAACAAAATAGAAACAAAG	AY987437	332	1.57984e-138	0.93	1	384	1	5	2	5	11	0	0	2	0	1	1	0	0	3	2	0	1	0	0	0	0	0	1	0	0	1	1	0
S1196_1108	Glomeromycota	Glomeromycetes	TCCCGTGTTGAGTCAAATTAAGCCGCAGGCTCCACTCCTGGTGGTGCCCTTCCGTCAATTCCTTTAAGTTTCAGCCTTGCGACCATACTCCCCCCAGAACCCAAACACTTTGATTTCTCATAAGGTGCCAATAAAGTCATTAAATATACTTTACTGATCCCTAGTCGGCATAGTTTATGGTTAAGACTACGACGGTATCTGATCGTCTTCGATCCCCTAACTTTCGTTCTTGATTAACGAAAACATCCTTGACGAATGCTTTCGCAGAAGTTAATCTTTCATAAATCCAAGAATTTCACCTCTGACAATTAAATATTAACGCCCCCAACTGTTCCTATTAATCATTATCTCGATCCCTGAAACCAACAAAATAAGATCGTGA	AF229771	323	1.5234e-134	0.93	2	373	7	0	0	0	33	0	6	0	0	0	1	0	0	0	0	0	1	0	0	0	2	0	0	0	0	3	0	0
S1196_1111	Basidiomycota	Agaricomycetes	CCCCGTGTTGAGTCAAATTAAGCCGCAGGCTCCACGCCTGGTGGTGCCCTTCCGTCAATTCCTTTAAGTTTCAGCCTTGCGACCATACTCCCCCCAGAACCCAAAGACTTTGATTTCTCGTAGGGTGCCGAGCGACACATGAAAAGGTAATCGCCCGATCCCCAGTCGGCATAGTTTACTGTTAAGACTACAACGGTATCTGATCGTTTTCGATCCCCTAACCTTCGTTCTTGATTAATGAAAACATCCTTGGCAAATGCTTTCGCAGTAGTTAGTCTTCCGTAAATCCAAGAATTTCACCTCTAGCAACGGAATACTAATGCCCCCAACTATCCCTATTAATCATTACGGCGACTCTAGAAACCAACAAAATAGAACCGCAC	AF334933	365	3.79273e-153	0.97	1	383	5	0	17	0	0	0	0	0	0	0	23	0	0	1	0	11	0	57	15	0	3	0	0	0	0	6	0	0
S1196_1112	Basidiomycota	Agaricomycetes	CCCTGTGTTGAGTCAAATTAAGCTGCAGGCTCCACTCCTGGTGGTGCCCTTCTGTCAATTCCTTTATGTTTCAGCCTTGCGACCATACTCCCCCCAGAACCCAAAGACTTTGATTTCTTGTAAGGTGCTGAACGACGCATAATATTGAGGTCGTCCGATCCCTAGTCGGCATAGTTTACTGTTAAGACTACAACAGTATCTGATCGTTTTCGATCCCCTAACCTTCGTTCTTGATTAATGAAAACATCCTTGGCAAATGCTTTTGCAATAGTTTGTCTTGTGTAAATCCAAGAATTTCACCTCTAGCAATACAATACAAATGCCCCCAACTATCCCTATTAATTATTACAGCAACTCTAGAAACCAACAAAATAGAACTGCATG	U59093	349	4.6553e-146	0.95	1	381	0	0	2	0	0	0	0	0	0	0	0	0	0	0	0	0	0	0	0	0	0	1	0	0	0	49	0	0
S1196_1113	Blastocladiomycota	Blastocladiomycetes	CCCCGTGTTGAGTCAAATTAAGCCGCAGGCTCCACATCTGGTGGTGCCCTTCCGTCAATTCCTTTAAGTTTCAGCCTTGCGACCATACTCCCCCCAGAACCCAAAAACTTTGATTTCTCAAAAGGTGCCGGACGTGTCTTTTTAAAAAAACTACAAGCGTCCGATCCCTGGTCGGCATCGTTTATGGTTAAGACTACGATGGTATCTAATCATCTTCGATCCCTTAACTTTCGTTCTTGATTAATGAAAACATCCTTGGCAAATGCTTTCGCAGAAGTTAGTCTTTCCTAAATCCAAGAATTTCACCTCTGACAATTAAATACTAATGCCCCCAACTATCCCTATTAATCATTACTCTAGTCCTAGAAACCAACAAAATAGAACCAAAG	U23936	377	1.86633e-158	0.98	1	389	0	0	0	0	0	0	0	0	0	0	0	67	1	0	0	0	0	0	0	0	0	0	0	0	0	0	0	0
S1196_1114	Chytridiomycota	Chytridiomycetes	CCCCGTGTTGAGTCAAATTAAGCCGCAGGCTCCACTCCTGGTGGTGCCCTTCCGTCAATTCCTTTAAGTTTCAGCCTTGCGACCATACTCCCCCCAGAACCCAAAAACTTTGATTTCTCGTAAGGTGCCGAACGAGTCGATATAGTAACGTCGTCCGATCCCTAGTCGGCATAGTTTATGGTTAAGACTACGACGGTATCTGATCGTCTTCGATCCCCTAACTTTCGTTCTTGATTAATGAAAACATCCTTGGCAAATGCTTTCGCAGAAGTTAGTCTTTCATAAATCCGAGAATTTCACCTCTGACAATTAAATACTAATGCCCCCAACTATCCCTATTAATCATTACTTCGGTTCCCGGAAACCAACAAAATAGAACCAAAG	DQ536490	364	1.05498e-152	0.97	1	384	79	136	7	33	2	5	2	10	0	76	39	87	12	33	4	6	266	54	19	3	0	5	0	45	9	13	26	4
S1196_1116	Basidiomycota	Agaricomycetes	CCCCGTGTTGAGTCAAATTAAGCCGCAGGCTCCACACCTGGTGGTGCCCTTCCGTCAATTCCTTTAAGTTTCAGCCTTGCGACCATACTCCCCCCAGAACCCAAAGACTTTGATTTCTCGTAAGGTGCCGGACGATACATCATATTTGAGGTCGTCCGATCCCTAGTCGGCATAGTTTACTGTTAAGACTACAACGGTATCTGATCGTTTTCGATCCCCTAACCTTCGTTCTTGATTAATGAAAACATCCTTGGCAAATGCTTTCGCAATAGTTGGTCTTGAGTCAATCCAAGAATTTCACCTCTAGCGACTCAATACCAATGCCCCCAACTATCCCTATTAATCATTACGGCGACTCTAGAAACCAACAAAATAGAACCGCACG	JF706311	379	2.39797e-159	0.99	1	385	28	5	2	7	5	3	1	1	1	4	7	1	17	5	1	1	31	0	1	0	3	2	0	0	0	1	0	1
S1196_1118	Basidiomycota	Agaricomycetes	CCCCGTGTTGAGTCAAATTAAGCCGCAGGCTCCACTCCTGGTGGTGCCCTTCCGTCAATTCCTTTAAGTTTCAGCCTTGCGACCATACTCCCCCCAGAACCCAAAGACTTTGATTTCTCGTAAGGTGCCGAGCCGCACATGATATTGAGACGGCCCGATCCCTAGTCGGCATCGTTTACTGTTAAGACTACAACGGTATCTGATCGTTTTCGATCCCCTAACCTTCGTTCTTGATTAATGAAAACATCCTTGACAAATGCTTTCGCAGAAGTTAGTCTTCAGTCAATCCAAGAATTTCACCTCTAGCGACTGAATACTAATGTCCCCAACTGTCCCTATTAATCATTACGGCAGCTCTAGAAACCAACAAAATAGAACCGCACG	DQ521415	378	6.63005e-159	0.99	1	384	20	19	4	0	0	0	4	0	0	13	23	2	5	8	0	0	14	0	0	0	2	2	0	7	1	10	2	0
S1196_1119	Chytridiomycota	Chytridiomycetes	CCCCGTGTTGAGTCAAATTAAGCCGCAGGCTCCACTCCTGGTGGTGCCCTTCCGTCAATTCCTTTAAGTTTCAGCCTTGCGACCATACTCCCCCCGGAACCCAAAGACTTTGATTTCTCATAAGGTGCTGATAGAGTCATACAATTAACATCTACCAATCCCTAGTCGGCATAGTTTATGGTTAGGACTACGACGGTATCTGATCATCTTCGATCCCCTAACTTTCGTTCTTGATTAATGAAAACATCCTTGGCAAATGCTTTCGCAGAAGTTAGTCTTTCATAAATCCAAGAATTTCACCTCTGACAATTAAATACTAATGCCCCCAACTATCCCTATTAATCATTACTTCGGTCCTAGAAACCAACAAAATAGAACCAACG	DQ643792	355	1.02037e-148	0.96	1	381	3	0	0	7	0	0	0	0	0	0	54	0	0	6	10	3	1	0	0	11	2	16	0	0	0	6	0	0
S1196_1120	Basidiomycota	Agaricomycetes	CCCCGTGTTGAGTCAAATTAAGCCGCAGGCTCCACACCTGGTGGTGCCCTTCCGTCAATTCCTTTAAGTTTCAGCCTTGCGACCATACTCCCCCCAGAACCCAAAGACTTTGATTTCTCGTAAGGTGTCGAATGATACATAATAATTGAGGTTATCCGATCTTTAGTCGGCATAGTTTACTGTTAAGACTACAACGGTATCTAATCGTTTTCGATCCCCTAACCTTCGTTCTTGATTAATGAAAACATCCTTGGCAAATGCTTTCGCAATAGTTGGTCTTGAGTTAATCCAAGAATTTCACCTCTAGCGACTCAATATCAATGTTTCTAACTATCCCTATTAATCATTACGGCGATTTTAGAAACCAACAAAATAGAACCGCACG	AF287835	359	1.7356e-150	0.96	1	385	0	23	94	3	7	21	1	0	0	4	2	19	38	0	0	9	0	0	630	1	1	3	0	3	0	0	1	0
S1196_1123	Mucoromycota	Mucoromycetes	CCCCGTGTTGAGTCAAATTAAGCCGCAGGCTCCACTCCTGGTGGTGCCCTTCCGTCAATTCCTTTAAGTTTCAGCCTTGCGTCCCATACTCCCCCCAGAACCCAAAAACTTTACTTTCGCTAAGATGCTGAGCCAGTCATAATAAACAGGCCCAATCTCTAGTCGGCATAGTTTGTGGTTAAGACTACGACGGTATCTAATCGTCTTCGATCCCTTAACTTTAGACCTTGATCAATGAAAACGTCCTGGGTCAAATGCTTTCGCAGTAGTTTGTCTTCGGTCAATCCAAGAATTTCACCTCTAGCGACCAAATACAAATGCCCCCAACCGTTTCTATTCATCATTACTCTAGTTCCTGAACCAACGAAATAGGGACTGAAG	JQ014009	367	4.90184e-154	0.98	1	381	4	2	4	2	0	0	37	0	0	0	0	3	6	5	60	6	0	2	3	5	3	8	13	2	11	0	0	0
S1196_1124	Basidiomycota	Agaricomycetes	CCCCGTGTTGAGTCAAATTAAGCCGCAGGCTCCACACCTGGTGGTGCCCTTCCACCTACAAATTTCAGCCTTGCGACCATACTCCCCCCAGAACCCAAAGACTTTGATTTCTCGTAAGGTGCCGAGTAACACATTAAAATTGAGGTTACCCGATCCCTAGTCGGCATAGTTTACTGTTAAGACTACAACGGTATCTGATCGTTTTCGATCCCCTAACCTTCGTTCTTGATTAATGAAAACATCCTTGGCAAATGCTTTCGCAATAGTTGGTCTTGAGTCAATCCAAGAATTTCACCTCTAGCGACTCAATACCAATGCCCCCAACTATCCCTATTAATCATTACGGCGACTCTAGAAACCAACAAAATAGAACCGCACG	DQ457645	353	7.7524e-148	0.96	1	379	0	0	0	0	0	0	0	0	0	0	0	10	0	0	0	0	0	0	0	0	0	0	0	0	0	0	0	0
S1196_1125	Basidiomycota	Agaricomycetes	CCCCGTGTTGAGTCAAATTAAGCCACAGGCTCCATGCCTGGTGGTGCCCTTCCATCAATTCCTTTAAGTTTCAGCCTTGCGACCATACTCCCCCCAGAACCCAAAGACTTTGATTTCTCGTAAGGTGCCAAGTGACACATAATGTGAGATCGCCCGATCCCTAGTCGGCATAGTTTACTGTTAAGACTACAATGGTATCTGATCGTTTTCAATCCCCTAACCTTCGTTCTTGATTAATGAAAACATCCTTGGCAAATGCTTTCACAGAAGTTAGTCTTCCGTAAATCCAAGAATTTCACCTCTAGCAACGGAATACTAATGCCCCCAACTATCCCTATTAATCATTATGGCGACTCTAAAAACCAACAAAATAGAACTGCACG	DQ521409	356	3.67938e-149	0.96	1	383	0	0	0	6	0	6	0	0	0	0	0	0	0	0	0	2	0	0	0	0	0	0	0	0	0	0	0	0
S1196_1126	Ascomycota	Archaeorhizomycetes	CCCCGTGTTGAGTCAAATTAAGCCGCAGGCTCCACTCCTGGTGGTGCCCTTCCGTCAATTCCTTTAAGTTTCAGCCTTGCGACCATACTCCCCCCAGAACCCAAAGACTTTGATTTCTCATAAGGTGCCGATCGAGTCAAGAAAAAACATCGACCGATCCCTAGTCGGCATAGTTTATGGTTAAGACTACGACGGTATCTGATCGTCTTCGATCCCCTAACTTTCGTTCTTGATTAATGAAAACATCCTCGGCAAATGCTTTCGCAGAAGTTAGTCTTCAATAAATCCAAGAATTTCACCTCTGACAATTGAATACTAATGCCCCCAACTATCCCTATTAATCATTACGGCGGTCCTAGAAACCAACAAAATAGAACCACACG	AY124370	369	6.41254e-155	0.98	1	383	37	0	0	1	1	0	0	0	0	2	5	0	2	1	0	0	1	0	0	0	2	0	0	1	2	2	0	1
S1196_1127	Basidiomycota	Agaricomycetes	ACACCTGGTGGTGCCCTTCCGTCAATTCCTTTAAGTTTCAGCCTTGCGACCATACTCCCCCCAGAACCCAAAGACTTTGATTTCTCGTAAGGTGCCGAGCAACACATCATAATTGAGGTTGCCCGATCCCTAGTCGGCATAGTTTACTGTTAAGACTACAACGGTATCTGATCGTTTTCGATCCCCTAACCTTCGTTCTTGATTAATGAAAACATCCTTGGCAAATGCTTTCGCAATAGTCGGTCTTGAGTCAATCCAAGAATTTCACCTCTAGCGACTCAATACCAATGCCCCCAACTATCCCTATTAATCATTACGGCGACTCTAGAGACCAACAAAATAGAACCGCACG	DQ457646	350	1.51688e-146	0.99	1	352	0	0	1	0	0	1	0	0	0	0	7	0	8	11	1	0	1	0	3	1	2	2	1	0	1	0	0	0
S1196_1129	Basidiomycota	Agaricomycetes	CCCCATGTTGAGTCAAATTAAGCCGCAGGCTCCACACCTGGTGGTGCCCTTCCGTCAATTCCTTTAAGTTTCAGCCTTGCGACCATACTCCCCCCAGAACCCAAAGACTTTGATTTCTCCTAAGGTGCCGAGCAACACATAAATATTGAGATTGCCCAATCCCTAGTTGGCATAGTTTACTGTTAAGACTACAACGGTATCTGATTGTTTTCGATCCCCTAACCTTCGTTCTTGATTAATGAAAACATCCTTGGCAAATGCTTTCGCAGTAGTTGGTCTTGAGTCAATCCAAGAATTTCACCTCTAGCAACTCAATACCAATGCCCCCAACTATCCCTATTAATCATTACAGCGACTCTAGAAACCAACAAAATAGAACCACACA	AF287841	364	1.05815e-152	0.97	1	384	0	0	0	0	0	43	0	0	0	0	0	0	0	0	0	0	0	0	0	0	0	0	0	0	0	0	0	0
S1196_1130	Ascomycota	Eurotiomycetes	CCCCGTGTTGAGTCAAATTAAGCCGCAGGCTCCACGCCTGGTGGTGCCCTTCCGTCAATTTCTTTAAGTTTCAGCCTTGCGACCATACTCCCCCCCGAGCCCAAAAACTTTGATTTCTCGTAAGGTGCCGAACGGGGCATAAAAAAACCACCGTCCGATCCCTAGTCGGCATAGTTTATGGTTAAGACTACGACGGTATC	U42473	200	2.12859e-80	1	1	200	0	0	0	1	1	1	1	0	0	0	10	1	10	0	3	1	2	0	4	2	3	3	4	2	2	1	0	0
S1196_1131	Ascomycota	Eurotiomycetes	CCCCGTGTTTAGAGGATCACCACATCACCCTTTCGGGCTGCTGTTCGGCGCAGAGTCTACTGCGGCTAGCGGTAAAGGTTTACGCCTTGTGGTGCCCTTCCGTCAATTTCTTTAAGTTTCAGCCTTGCGACCATACTCCCCCCAGAACCCAAAAACTTTGATTTCTCGTAAGGTGCCGAACGGGTCATCATAGAATCCCGTCCGATCCCTAGTCGGCATAGTTTATGGTTAAGACTACGACGGTATCTGATCGTCTTCGATCCCCTAACTTTCGTTCCCTGATTAATGAAAACATCCTTGGCGAATGCTTTCGCAGTAGTTAGTCTTCAGCAAATCCAAGAATTTCACCTCTGACAGCTGAATACTGACGCCCCCGACTATCCCTATTAATCATTACGG…	AY526485	420	1.99008e-177	0.97	7	455	0	0	1	1	0	0	0	0	0	0	0	0	0	0	0	0	0	0	0	7	0	0	0	0	0	0	0	0
S1196_1134	Chytridiomycota	Chytridiomycetes	CCCCGTGTTGAGTCAAATTAAGCCGCAGGCTCCACTCCTGGTGGTGCCCTTCCGTCAATTCCTTTAAGTTTCAGCCTTGCGACCATACTCCCCCCGGAACCCAAAGACTTGATGATTTCTCCATAAGGTGCCGATGGAGTCATATATAATAAAAAAATAACATCCACCGATCCCTAGTCGGCATAGTTTATGGTTAAGACTACGACGGTATCTGATCATCTTCGATCCCCTAACTTTCGTTCTTGATTAATGAAAACATCCTTGTGGAATGCTTTCGCAGAAGTTAGTCTTTCATAAATCCAAGAATTTCACCTCTGACAATTAAATACTAACCACCCCAACTATCCCTATTAATCATTACTTCGGTCCTAGAAACCAACAAAATAGAACCAAAGTCCT…	JN020240	350	1.85059e-146	0.93	1	418	0	0	0	0	7	0	0	0	0	0	2	0	24	0	0	9	13	0	0	0	0	19	3	11	2	0	0	0
S1196_1137	Ascomycota	Fungi_other	CCCCGTGTTGAGTCACTGCGGCAACCGGCGACGGTTTACTCCTGGTGGTGCCCTTCCGTCAATTCCTTTAAGTTTCAGCCTTGCGACCATACTCCCCCCAGAACCCAAAAACTTTGATTTCTCTTAAGGTGCCGAGCGAGTCATTTGAAACTGCGCCCGATCCCTAGTCGGCATAGTTTATGGTTAAGACTACGACGGTATCTAATCGTCTTCGATCCCCTAACTTTCGTTCTTGATTAATGAAAACATCCTTGGCAAATGCTTTCGCAGTAGTTAGTCTTCAATAAATCCAAGAATTTCACCTCTGACAATTGAATACTAATGCCCCCAACTATCCCTATTAATCATTACGGTGGTCCTAGAAACCAACAAAATAGAACCAACG	AY124370	321	1.18224e-133	0.92	1	382	0	0	0	0	0	0	0	0	0	0	0	0	0	13	0	0	0	0	0	0	1	0	0	2	0	0	0	0
S1196_1140	Ascomycota	Lecanoromycetes	CCCCGTGTTGAGTCAAATTAAGCCGCAGGCTCCACGCCTGGTGGTGCCTTTCCGTCAATTTCTTTAAGTTTCAGCCTTGCGACCATACTCCCCCCAGAACCCAAAAACTTTGATTTCTCGTAAGGTGCTCAATGCGTCAATATAATAACAGCATCAAATCCCTAGTCGGCATAGTTTATGGTTAAGACTACGACGGTATCTGATCGTCTTCGATCCCCTAACTTTCGTTCACTGATTAATGAAAACATCCTTGGCAAATGCTTTCGCAGTAGTTAGTCTTCAATAAATCCAAGAATTTCACCTCTGACAATTGAATACTGATGCCCCCGACTATCCCTATTAATCATTACGGCGGTCCTAGAAACCAACAAAATAGAACCACACG	EU360867	367	4.96144e-154	0.97	1	385	0	0	0	0	0	0	0	0	0	0	0	0	0	0	0	0	0	0	0	0	0	0	0	0	0	0	0	0
S1196_1142	Chytridiomycota	Chytridiomycetes	TCCCGTGTTGAGTCAAATTAAGCCGCAGGCTCCACTCCTGGTGGTGCCCTTCCGTCAATTCCTTTAAGTTTCAGCCTTGCGACCATACTCCCCCCGGAACCCAAAAACTTTGATTTCTCACAGGGTGCTGAACGGGGCAAAGAATTGCCCGTCCAATCCCCAGTCGGCATAGTTTATGGTTAAGACTACGACGGTATCTGATCGTCTTCGATCCCCTAACTTTCGTTCTTGATTAATGAAAACATCCTTGGCAAATGCTTTCGCAGAAGTTAGTCTTTCATAAATCCAAGAATTTCACCTCTGACAATTAAATACTAATGCCCCCAACTATCCCTATTAATCATTACTTCGGTCCTAGAAACCAACAAAATAGAACCAAAG	DQ536490	353	7.79981e-148	0.96	2	381	0	0	0	0	0	0	0	0	0	0	0	644	0	0	0	0	0	0	0	0	0	0	0	0	0	0	0	0
S1196_1143	Ascomycota	Fungi_other	CCCCGTGTTGAGTCAAATTAAGCCGCAGGCTCCACTCCTGGTGGTGCCCTTCCGTCAATTCCTTTAAGTTTCAGCCTTGCGACCCAGAACCCAAAAACTTTGATTTCTCGTAAGGTGCCGAACGAGTCAATATAGTAACGTCGTCCGATCCCTAGTCGGCATAGTTTATGGTCAAGACTACGACGGTATCTGATCGTCTTCAATCCCCTAACTTTCGTTCTTGATTAATGAAAACATCCTTGGCAAATGCTTTCGCAGAAGTTAGTCTTTCATAAATCCAAGAATTTCACCTCTGACAATTAAATACTAATGCCCCCAACTATCCCTGTTAATCATTACTTCGGTTCCTGGAAACCAACAAAATGGAACCAAAAG	GU250359	302	2.99288e-125	0.91	1	370	0	0	0	0	0	0	0	0	0	0	2	0	0	0	0	0	0	5	0	0	0	0	0	0	0	0	0	0
S1196_1144	Chytridiomycota	Chytridiomycetes	TCCCGTGTTGAGTCAAATTAAGCCGCAGGCTCCAATCCTGGTGTGCCCTTCCGTCAATTCCTTTAAGTTTCAGCCTTGCGACCATACACCCCCCAGAACCCAAAAACTTTGATTTCTCGTAAGGTGCCGATGGGGCTTGCGAGCGCCCACCGATCCCTAGTCGGCATAGTTTATGGTTAGGACTACGACGGTATCTGATCGTCTTCGATCCCCTAACTTTCGTTCTTGATTAATGAAAACATCCTTGGCAAATGCTTTCGCAGAAGTTAGTCCTTCATAAATCCATGAATTTCACCTCTGACAATGAAATACTAATGCCCCCAACTATCCCTATTAATCATTACTTCGGTCCCGGAAACCAACAAAATAGAACCAAAGTCCTATTTCATTATTCCATGC…	EU154974	351	6.36318e-147	0.94	2	401	0	0	0	0	0	0	0	0	0	0	0	0	5	0	0	0	0	0	0	0	0	1	1	0	0	0	0	0
S1196_1146	Ascomycota	Dothideomycetes	CCCCGTGTTGAGTCAAATTAAGCCGCAGGCTCCACGCCTGGTGGTGCCCTTCCGTCAATTTCTTTAAGTTTCAGCCTTGCGACCATACTCCCCCCAGAACCCAAAAACTTTGATTTCTCGTAAGGTGCCGAGCGGGTCAAGATAGAAACACCGCCCGATCCCTAGTCGGCATAGTTTACGGTTAAGACTACGACGGTATCTGATCGTCTTCGATCCCCTAACTTTCGTTCACTGATTAATGAAAACATCCTTGGCAAATGCTTTCGCAGTAGTTAGTCTTCAATAAATCCAAGAATTTCACCTCTGACAATTGAATACTGATGCCCCCGACTATCCCTATTAATCATTACGGCGGTCCTAGAAACCAACAAAATAGGACCGCACG	GQ925831	385	5.27182e-162	1	1	385	32	24	7	88	205	157	135	28	0	12	34	252	234	31	96	7	76	1	6	80	21	19	346	77	18	3	1	27
S1196_1147	Kickxellomycota	Kickxellomycetes	CCCCGTGTTGAGTCGAATTGAGCCGCAGGCTCCACTCCTGGTGGTGCCCTTCCGTCAATTCCTTTAAGTTTCAGCCTTGCGACCATACTCCCCCCGGAACCCAAAAACTTTGATTTCTCCTACGGTGCCAAGCAAGTCGTTATATTTTAACATTGCCTGATCCCGAGTCGGCATAGTTTATGGTTAAGACTACGACGGTATCTAATCGTCTTCGATCCCCTAACTTTCGTTCTTGATTAATGAAAACATCCTTGGCAGACGCTTTCGCATCAGTTTGTCTGACACTGGTTCAAGTATTTCACCACTGACAGTGCCATACAAATGCCCCCAACTGTCCCTATTAATCATTACCTTGGTTTTAGAAACCAACAAAATAAAACCAAAG	JN940691	378	6.65002e-159	0.99	2	385	0	2	0	0	0	0	0	0	0	0	0	50	1	0	0	0	0	0	0	0	0	0	3	0	0	0	0	0
S1196_1149	Ascomycota	Sordariomycetes	CCCCGTGTTGAGTCAAATTAAGCCGCAGGCTCCACCCCTGGTGGTGCCCTTCCGTCAATTTCTTTAAGTTTCAGCCTTGCGACCATACTCCCCCAGGAACTCAGAAACTTTACTTTCGTGTAAGGTGCCGAACGAGTCAAAAATAACATCGTCCGATCCCTAGTCAGCATAGTTTATGGTTGAGACTACGACGGTATCTGATCGTCTTCGATCCCCCAACTTTCGTTCCTGATTAATGAAAACATCCTTGGCAAATGCTTTCGCAGTAGTTAGTCTTCAATCGATCCAAGAATTTCACCTCTGACGATTGAATACTGATGCCCCCGACTGTCCCTATTAATCATTACGGCGGTCCTAGAAACCAACAAAATAGAACCACACG	DQ862045	359	1.71997e-150	0.97	1	382	7	0	3	7	0	1	0	1	0	1	3	0	0	0	0	0	21	0	0	0	0	1	0	3	0	1	2	0
S1196_1150	Basidiomycota	Agaricomycetes	CCCCATGTTGAGTCAAATTAAGCCACAGGCTCCACTCCTGGTGGTGCCCTTCCATCAATTCCTTTAAGTTTCAGCCTTGCAACCATACTCCCCCCAGAACCCAAAGACTTTGATTTCTCATAAGGTGCCAAGTGACACATAAAAGTGAAATCACCTGATCCCTAGTTGGCATAGTTTACTGTTAAGACTACAATGGTATCTGATCATTTTTGATCCCCTAACCTTCATTCTTGATTAATGAAAACATCCTTGGCAAATGCTTTGGCAGAAGTTAGTCTTCAGTAAATCCAAGAATTTCACCTCTAGCAACTGAATACTAATGCCCCCAACTATCCCTATTAATCATTATGGTGACTCTAGAAACCAACAAAATAGAACCACACA	EU215396	345	2.7534e-144	0.95	1	383	0	0	0	0	0	0	0	0	0	0	0	0	9	0	0	0	0	0	0	0	0	0	0	0	0	0	0	0
S1196_1152	Ascomycota	Dothideomycetes	CCCCGTGTTGAGTCAAATTAAGCCGCAGGCTCCACGCCTGGTGGTGCCCTTCCGTCAATTTCTTTAAGTTTCAGCTAAAATAAATCAGTATTTCGAATAAATTAAAAGGTTTTTTTAAAACTTACCCTTGCGACCATACTCCCCCCAGAACCCAAAGACTTTGATTTCTCGTAAGGTGCCGAGCGAGTCAAAATGGTAACATCGCCCGATCCCTAGTCGGCATAGTTTATGGTTAAGACTACGACGGTATCTGATCGTCTTCGATCCCCTAACTTTCGTTCACTGATTAATGAAAACATCCTTGGCAAATGCTTTCGCAGTAGTTAGACTTCAGTAAATCCAAGAATTTCACCTCTGACTACCGAGTTCTGATGCCCCCGACTATCCCTATTAATCATT…	EF053578	305	1.69654e-126	0.95	110	444	0	0	0	0	0	0	0	0	0	0	0	49	0	0	0	0	0	0	0	0	0	0	0	0	0	0	0	0
S1196_1153	Basidiomycota	Fungi_other	CCTCATGTTGAGTCAAATTAAGCGGCAGGCTCCACACCTGGTGGTGCCCTTCCGTCAATTCCTTTAAGTTTCAGCCTTGTGACCATACTCCCTCCAGAACCCAAAGACTTTGATTTCTTGTAAGGTGCTGAGCAACACATAAAAATTGAGGTCATCCAATCCTTAGTTAGCATAGTTTACTGTTAAGACTACAATGGTATCTAATCGTTTTCGATCCCCTAACCTTCGCTCTTGATTAATGAAAACATCCTTGGCAAATGCTTTCACAGTTGTTGGTCTTGAGTCAATCTAAGAATTTCACCTCTAGCAACTCAATACCAATGCCCCCAACTATCCCTATTAATCATTACAGCGACTCTAGAAACCAACAAAATAGAACTGCATGTCCTATTTTATTAT…	AY916700	360	6.69076e-151	0.94	1	408	0	0	0	0	0	0	0	0	0	5	0	0	0	0	0	0	0	0	0	0	0	0	0	0	0	0	0	0
S1196_1154	Chytridiomycota	Fungi_other	CCCCGTGTTGAGTCAAATTAAGCCGCAGGCTCCACTCCTGGTGGTGCCCTTCCGTCAATTCCTTTAAGTTTCAATCTTGCGACCATACTCCCCCCGGAACCCAAAAACTTTGATTTCTCCTAGGGTGCCGAACGGGTCATGATAACACCGTCCGATCCCCAGTCGGCATCGTTTATGGTTGAGACTACAACGGTATCTGATCGTTTTTGATCCCCCAACTTTCGTTCTTGATCAATGAAAACATCGTTGGCAAAAGCTTTCGCAGTAGTTAGTCTTTACTCAATCCAAGAATTTCACCTCTGACGATTAAATACTAATGCCCCCCACTGTTCCTATTCATCATTACTCAGGTTTTAGAAACCAACAAAATAAAACCGAAG	DQ536473	320	3.22934e-133	0.92	1	380	0	0	0	0	0	0	0	0	0	0	0	0	0	30	2	0	6	0	0	0	3	0	1	0	0	1	0	0
S1196_1155	Basidiomycota	Agaricomycetes	CCCCGTGTTGAGTCAAATTAAGCCGCAGGCTCCACACCTGGTGGTGCCCTTCCGTCAATTCCTTTAAGTTTCAGCTTTGCGACCATACTCCCCCCAGAACCCAAAAACTTTGATTTCTCGTAAGGTGCCGAGCGACACATAAAAATTGAGTTCGCCCGATCCCTAGTCGGCATAGTTTACTGTTAAGACTACAACGGTATCTGATCGTTTTCGATCCCCTAACCTTCGTTCTTGATTAATGAAAACATCCTTGGCAAATGCTTTCGCAGTAGTCGGTCTTGAGTCAATCCAAGAATTTCACCTCTAGCGACTCAATACCAATGCCCCCAACTATCCCTATTAATCATTACGGCGACTCTAGAAACCAACAAAATAGAACCGCACG	KJ417176	378	6.65002e-159	0.99	1	385	43	100	20	44	665	54	19	3	0	24	43	90	454	41	6	51	3	1	10	24	105	94	4	341	10	31	14	8
S1196_1156	Chytridiomycota	Chytridiomycetes	CCCCGTGTTGAGTCAAATTAAGCCGCAGGCTCCACTCCTGGTGGTGCCCTTCCGTCAATTCCTTTAAGTTTCAGTCTTGCGACCATACTCCCCCCGGAACCTAAAAACTTTGATTTCTCATAAGGTGCCAAACAAGTCATTAATAAACATTGTCTGATCCCTAGTCGGCAAAATTTATGGTTAAGACTACGACGGTATCTGATCGTCTTCGATCCCCTAACTTTCGTTCTTGATTAATGAAAACATCCTTGACAGATGCTTTCGCATATGGGCGTCTTGAGCCGATCCAAGAATTTCACCTCTGACGGCTCAGTACGAATGTCCCCAACTATCCCTATTAATCATTACTTCGGTTTCGAAAACCAACAAAATAAAACCAAAG	AF372719	343	2.10478e-143	0.95	1	382	0	0	0	0	0	0	0	0	0	0	3	9	0	7	0	11	33	0	19	0	0	0	4	0	0	2	0	3
S1196_1159	Ascomycota	Dothideomycetes	CCCCGTGTTGAGTCAAATTAAGCCGCAGGCTCCACTCCTGGTGGTGCCCTTCCGTCAATTTCTTTAAGTTTCAGCCTTGCGACCATACTCCCCCCAGAACCCAAAAACTTTGATTTCTCGTAAGGTGCCGATGGAGTCAAAAGAAAAACATCCACCGATCCCTAGTCGGCATAGTTTATGGTTAAGACTATAAGAAATTTAGTTAGTTATATGATTACAATTATTTAGCTTTGCATATCTCCCACTCACCTACGACGGTATCTGATCGTCTTCGATCCCCTAACTTTCGTTCACTGATTAATGAAAACATCCTTGGCAAATGCTTTCGCAGTAGTTAGTCTTCAGCAAATCCAAGAATTTCACCTCTGACAGCTGAATACTAGTGCCCCCGACTGTCCC…	GU296175	251	1.5046e-102	0.85	101	469	34	0	0	0	0	0	0	0	0	0	0	0	0	0	0	0	0	0	0	0	0	0	0	0	0	0	0	0
S1196_1160	Ascomycota	Pezizomycetes	CCCCGTGTTGAGTCAAATTAAGCCGCAGGCTCCACTCCTGGTGGTGCCCTTCCGTCAATTCCTTTAAGTTTCAGCCTTGCGACCATACTCCCCCCAGAACCCAAAGACTTTGATTTCTCGTAAGGTGCCGAACGGGTCAAAAAAGAAGCCCGTCCGATCCCTAGTCGGCATAGTTTATGGTTAAGACTACGACGGTATCTGATCGTCTTCGATCCCCTAACTTTCGTTCACTGATTAATGAAAACATCCTTGGCAAATGCTTTCGCAGTAGTTAGTCTTCAATTAATCCAAGAATTTCACCTCTGACAATTGAATACTGATGCCCCCGACTATCCCTATTAATCATTACGGCGGTCCTAGAAACCAACAAAATAGAACCACACG	AF515326	382	1.12097e-160	0.99	1	384	6	28	12	48	128	57	234	14	0	6	49	94	608	15	69	12	8	22	0	92	8	20	10	371	31	25	7	6
S1196_1162	Monoblepharidomycota	Monoblepharidomycetes	CCCCGTGTTGAGTCAAATTAAGCCGCAGGCTCCACTCCTGGTGGTGCCCTTCCGTCAATTCCTTTAAGTTTCAGCCTTGCGACCATACTCCCCCCAGAACCCAAAAGCTTTGATTTCTCACACCGTGCCGATGAGGTCAAAAAATAACACCCACCGATCCGGAGCTGGCATAGTTTATGGTTAAGACTACGACGGTATCTGATCGTCTTCGATCCCCTAACTTTCGTTCTTGATCAATGAAAACATCCTTGGCAAATGCTTTCGCAGAAGTTCGTCTTTCATAAATCCAAGAATTTCACCTCTGACAATTAAATACGAATGCCCCCAACTATCCCTATTAATCATTACTCTAGTTCCAGAAACCAACAAAATAGAACCAGGG	AY546682	358	4.7698e-150	0.96	1	382	0	0	0	1	0	0	0	0	0	0	0	24	0	0	0	0	0	0	0	0	0	0	0	0	0	0	0	0
S1196_1163	Kickxellomycota	Kickxellomycetes	TCCCGTGTTGAGTCGAATTGAGCCGCAGGCTCCACTCCTGGTGGTGCCCTTCCGTCAATTCCTTTAAGTTTCAGCCTTGCGACCATACTCCCCCCGGAACCCAAAAACTTTGATTTCTCATACGGTGCCAAGTAGCAAATTTTAACACTACCTGATCCCGAGTCGGCATAGTTTATGGTTAAGACTACGACGGTATCTAATCGTCTTCGATCCCCTAACTTTCGTTCTTGATTAATGAAAACATCCTTGGCAGACGCTTTCGCATCAGTTTGTCTGGCACTGGTTCAAGTATTTCACCACTGACAGTGCCATACAAATGCCCCCAACTGTCCCTATTAATCATTACCTTGGTTTTAGAAACCAACAAAATAAAACCAAAG	JN940695	358	4.74089e-150	0.97	1	380	0	0	0	0	0	0	0	0	0	0	0	0	0	0	0	0	8	0	0	0	0	0	0	0	0	0	0	0
S1196_1166	Ascomycota	Dothideomycetes	CCCCGTGTTGAGTCAAATTAAGCCGCAGGCTCCACGCCTTGTGGTGCCCTTCCGTCAATTTCTTTAAGTTTCAGCCTTGCGACCATACTCCCCCCAGAACCCAAAAACTTTGATTTCTCGTACGGTGCCGAGCGAGTCAAAAAAAGAACATCGCCCGATCCCGAGTCGGCATAGTTTACGGTTAAGACTACGACGGTATCTGATCGTCTTCGATCCCCTAACTTTCGTTCACTGATTAATGAAAACATCCTTGGCAAATGCTTTCGCAGTAGTTAGTCTTCAATAAATCCAAGAATTTCACCTCTGACAATTGAATACTGATGCCCCCGACTGTCCCTATTAATCATTACGGCGGTCCTAGAAACCAACAAAATAGAACCGCACG	U42481	376	5.11427e-158	0.98	1	385	10	1	3	14	32	11	1	6	0	1	29	24	38	35	39	5	19	2	0	37	13	49	23	17	67	25	0	4
S1196_1167	Ascomycota	Fungi_other	CCCCGTGTTGAGTCAAATTAAGCCGCAGGTTCCACTCCTGGTGGTGCCCTTCCGTCAATTTCTTTAAGTTTCAGCCTTGCGACCATACTCCCCCTGGAGCCCAAGCACTTAAAGATTTCTCGTAGGGTGCTGAGCGGGTCAAGAATTAACACCGCCCAATCCCCAGTCGGCATAGTTTATGGTTAAGACTACGACGGTATCTGATCGTCTTCGATCCCCTAACTTTCGTTCCTGATTAATGAAAACACCCTTGGCGAATGCTTTCGCAGTAGTTAGTCTTGCATCGATCTAAGAATTTCACCTCTGACGATGCAATACTGACGCCCCCGATTGTTTCTGTTAATCATTACAGACGTCCTAGAAACCAACAAAATAGAACATCTGTCCTATTCCATTATT…	FJ748919	344	8.1647e-144	0.94	2	407	0	2	0	1	1	0	6	0	0	0	0	4	0	0	0	1	0	0	0	6	0	0	0	0	0	0	0	0
S1196_1168	Glomeromycota	Glomeromycetes	CCCCGTGTTGAGTCAAATTAAGCCGCAGGCTCCACTCCTGGTGGTGCCCTTCCGTCAATTCCTTTAAGTTTCAGCCTTGCGACCATACTCCCCCCGGAACCCAAAGACTTTGATTTCTCGGAAGGTGCCAATGGAGTCGTAATAACAGCCACTGATCCCTAGTCGGCATAGTTTATGGTTAAGACTACGACGGTATCTGATCGTCTTCGATCCCCTAACTTTCGTTCTTGATTAATGAAAACATCCTTGGCAAATGCTTTCGCAGAAGTTCGTCTTTCAAAAATCCAAGAATTTCACCTCTGACATTGAAATACGAATGCCCCCAACTATCCCTATTAATCATTACCTCGGTCCAAGAAACCAACAAAACAGAACCAAAG	AF229771	334	2.0295e-139	0.93	1	380	3	1	1	0	5	0	0	0	0	1	3	6	0	3	1	9	3	29	5	1	3	2	4	2	2	4	2	0
S1196_1171	Glomeromycota	Glomeromycetes	TCCCGTGTTGAGTCAAATTAAGCCACAGGCTCCACCCCTGGTGGTGCCCTTCCGTCAATTCCTTTAAGTTTCAGCCTTGCAACCATACTCTCCCGGAACCTAAACACTTTGGTTCCCCATAAGGCGCCGAATGAGTCATTAAAAAAATTAACATCATCCGATCCCTAATCGGCATAGTTTATGGTTAAGACTACGACGGTATCTAATCATCTTCGATCTCCTAACTTTCGTTCTTGATTAATGAAAACATCCTTGACAAATGCTTTCGCAGTAGTTAGTCTTCAATAAATCCAAGAATTTCACCTCTGACAATTGAATACTAATGCCCCAACTATCCCTATTAATCATTACGTTAATCCTAGAAAACCAACAAAATAGAATCAAAACGTCCTATTTTAT…	AY903702	363	3.15477e-152	0.95	2	410	0	0	0	0	0	0	0	0	0	0	0	5	0	0	0	0	0	0	0	0	0	0	0	0	0	0	0	0
S1196_1172	Ascomycota	Dothideomycetes	CCCCGTGTTGAGTCAAATTAAGCCGCAGGCTCCACGCCTGGTGGTGCCCTTCCGTCAATTTCTTTAAGTTTCAGCCTTGCGACCATACTCCCCCCAGAACCCAAAAACTTTGATTTCTCGTAAGGTGCCGATGGGGTCATAACAGTAACACTCACCGATCCCTAGTCGGCATAGTTTATGGTTAAGACTACGACGGTATCTGATCGTCTTCGATCCCCTAACTTTCGTTCACTGATTAATGAAAACATCCTTGGCAAATGCTTTCGCAGTAGTTAGTCTTCAATAAATCCAAGAATTTCACCTCTGACAATTGAATACTAATGCCCCCGACTATCCCTATTAATCATTACGGCGGCCCTAGAAACCAACAAAATAGAACCGCACG	GU250351	383	4.05435e-161	0.99	1	385	24	19	5	52	9	1	21	5	0	9	160	56	35	44	36	7	294	0	0	2	6	14	10	0	3	2	0	9
S1196_1175	Ascomycota	Sordariomycetes	CCCCGTGTTGAGTCAAATTAAGCCGCAGGCTCCACTCCTGGTGGTGCCCTTCCGTCAATTTCTTTAAGTTTCAGCCTTGCGACCATACTCCCCCTGGAACCCAAAGACTTTGATTTCTCGTAGGGTGCCGAACGAGTCAAAAGATAACATCGTCCGATCCCCAGTCGGCATAGTTTATGGTTAAGACTACGACGGTATCTGATCGTCTTCGATCCCCTAACTTTCGTTCCTGATTAATGAAAACATCCTTGGCAAATGCTTTCGCAGTAGTTAGTCTTCAATAAATCCAAGAATTTCACCTCTGACAATTGAATACTGATGCCCCCGACTGTCCCTATTAATCATTACGGCGGTCCTAGAAACCAACAAAATAGAACCACGCG	AF279409	369	6.41254e-155	0.98	1	383	15	20	4	10	148	143	9	12	0	97	27	60	72	16	18	9	25	64	10	5	28	31	10	27	26	11	4	6
S1196_1177	Ascomycota	Saccharomycetes	CCCCGTGTTGAGTCAAATTAAGCCGCAGGCTCCACTCCTGGTGGTGCTCTTCCGTCAATTCCTTTAAGTTTCAGCCTTGCAACCATACTCCCCCCAGAACCCAAAAACTTTAATTTCTCGTAAGGTGCCGAGCGGGCAAAGTAGCACCGCCCGATCCCTAGTCGGCATAGTTTATGGTTAAGACTACGACGGTATCTGATCATCTTCGATCCCCTAACTTTCGTTCTTGATTAATGAAAACGTCCTTGGCAAATGCTTTCGCAGTAGTTAGTCTTCAGTCAATCCAAGAATTTCACCTCTGACGACTGAATACTGATGCCCCCGACCGTCCCTATTAATCATTACGATGGTCCTAGAAACCAACAAAATAGAACCATACGTCCTATTTCATTATTCCAT…	JN941109	387	7.22542e-163	0.98	1	403	0	0	0	0	0	0	0	0	0	0	0	0	0	0	0	0	0	0	0	0	0	0	0	3	0	0	0	0
S1196_1180	Ascomycota	Fungi_other	CCCGGCGCTTTTAGGAGCAGAGTTACTGCGGCTAGCTGTAAAAGTTTACCCCTGGTGGTGCCCTTCCGTCAATTTCTTTAAGTTTCAGCCTTGCGACCATACTCCCCCAGGAGCCCAAACATTTTGATTTATCGTAAGGTGCCGAACGAGTCAAAAAATAACATCGTCCGATCCCTAATCGGCATAGTTTATGGTTAAGACTACGACGGTATCTGATCGTCTTCGATCCCCTAACTTTCGTTCCTGATTAATGAAAACATCCTTGGCGAATGCTTTCGCAGTAGTTCGTCTTCAATAGATCCAAGAATTTCACCTCTGACAATTGAATACGGACGCCCCCGACTGTCCCTATTAATCATTACGGCGGTCCTAGAAACCAACAAAATAGAACCGCACG	GQ249950	351	6.29025e-147	0.94	7	397	0	0	0	0	0	0	0	0	0	0	0	0	0	0	0	0	0	0	0	0	0	0	0	0	0	2	0	0
S1196_1181	Basidiomycota	Agaricomycetes	CCCCGTGTTGAGTCAAATTAAGCCGCAAGCTCCACTCCTGGTGGTGCCCTTCCGTCAATTCCTTTAAGTTTCAGCCTTGCGACCATACTCCCCCCAGAACCCAAAGACTTTGATTTCTCGTAAGGTGCCGAGCGACACATCATAATTGAGGTCGCCCGATCCCTAGTCGGCATAGTTTACTGTTAAGACTACAACGGTATCTGATCGTTTTCGATCCCCTAACCTTCGTTCTTGATTAATGAAAACATCCTTGGCAAATGCTTTCGCAATAGTCGGTCTTGAGTCAATCCAAGAATTTCACCTCTAGCGACTCAATACCAATGCCCCCAACTATCCCTATTAATCATTACGGCGACTCTAGAAACCAACAAAATAGAACCGCACG	AF287837	381	3.11804e-160	0.99	1	385	3928	8926	3924	10875	3850	1714	3002	859	15	4101	2815	7635	13007	6588	790	2761	5241	1481	3255	868	3468	15224	1115	2820	792	7693	1386	2933
S1196_1182	Ascomycota	Eurotiomycetes	TCCCGTGTTGAGTCAAATTAAGCCGCAGGCTCCACGCCTTGTGGTGCCCTTCCGTCAATTTCTTTAAGTTTCAGCCTTGCGACCATACTCCCCCCAGAGCCCACAAATTTTGATTTCTCGTAAAGTGCCAAACGGGTCATATAAAAACACCGTCTGATCCTTAATCGGCACAGTTTATGGTTGAGACTACGACGGTATCTGATCGTCTTCGATCCCCCAACTTTCGTTCACTGATTAATGAAAACATCCTTGGCGAATGCTTTCGCAGTAGTTAGTCTTCAATAAATCCAAGAATTTCACCTCTGACAATTGAATACTGACGCCCCCGACTATCCCTATTAATCATTACAGCGGTCCTAGAAACCAACAAAATAGGGCCGCATG	FJ358326	349	4.6553e-146	0.96	1	380	0	0	0	0	0	0	0	0	0	0	0	0	0	0	0	0	0	0	41	0	0	0	0	0	0	0	0	0
S1196_1183	Entomophthoromycota	Entomophthoromycetes	CCCCGTGTTGAGTCAAATTAAGCCGCAGGCTCCACTCCTGGTGGTGCCCTTCCGTCAATTCCTTTAAGTTTCAGCCTTGCGACCATACTCCCCCCGGAACCCAAAAACTTTGATTTCTCTTAAGGTGCTAAACTTTTTAAAATTAAAAGTCTAATCCCTAGTTGGCATAGTTTATAGTTGAGACTACGACGGTATCTAATCATCTTCGATCCCCCAACTTTCGTCCTTGATCAATGGGAATGTCCTTGGCAAATGCTTTCGCAGAAGTTAGTCTTTCATAAATCCAAGAATTTCACCTCTGACAATTAAATACTAATGCCCCCAACCATCCCTATTCATCATTACTTTGGTTCTATAAACCAACAAAATAGATCCAAAG	JQ014015	345	2.71193e-144	0.96	2	379	2	0	0	0	8	0	0	0	0	0	0	0	7	0	0	0	0	0	0	0	0	0	0	0	0	0	0	0
S1196_1184	Glomeromycota	Glomeromycetes	CCCCGTGTTGAGTCAAATTAAGCCGCAGGCTCCACCCCTGGTGGTGCCCTTCCGTCAATTCCTTTAAGTTTCAGCCTTGCGACCATACTCCCCCCGGAACCCAAAAACTTTGGTTTCCCATAAGGCGCCGAGCGAGTCATGAAAATAACGACGCCCGATTCCTAGTCGGCATAGTTTATGGTTAAGACTACGACGGTATCTGATCGTCTTCGATCCCCTAACTTTCGTTCTTGATTAATGAAAACATCCTTGGCAAATGCTTTCGCAATAGTTAGTCTTCAATAAATCCAAGAATTTCACCTCTGACAATTGAATACTAATGCCCCCAACTATCCCTATTAATCATTACGGTGGTCCTAGAAACCAACAAAATAGAACCGCACG	EF136887	350	1.67868e-146	0.96	1	379	0	5	4	2	0	0	0	0	0	0	24	86	0	5	0	1	20	0	0	0	4	7	0	0	0	0	4	0
S1196_1186	Ascomycota	Pezizomycetes	CCCCGTGTTGAGTCAAATTAAGCCGCAGGCTCCACTCCTGGTGGTGCCCTTCCGTCAATTCCTTTAAGTTTCAGCCTTGCGACCATACTCCCCCCGGAACCCAAACACTTTGATTTCTCGGAAGGTGCCGGGCAGGTCATGGAAAACAACACTGCCCGATCCCTAGTCGGCATCGTTTATGGTTAAGACTACGACGGTATCTGATCGTCTTCGATCCCCTAACTTTCGTTCCTGATTAATGAAAACATCCTTGGCAAATGCTTTCGCAGTAGTTAGTCTTCAATAAATCCAAGAATTTCACCTCTGACAATTGAATACTGATGCCCCCGACTGTCCCTATTAATCATTACGGCGGTCCTAGAAACCAACAAAATAGAACCACACGTCCTATTCTATTAT…	U42661	375	1.51625e-157	0.96	1	408	0	0	0	0	0	0	0	0	0	0	3	0	0	1	0	0	0	0	0	0	1	0	0	0	0	0	0	0
S1196_1187	Basidiomycota	Fungi_other	CCCCGTGTTGAGTAAAATTAAGCTGCAGGCTCCACACCTGGTGGTGCCCTTCCGTCAATTCCTTTAAGTTTCAGCCTTGTGACCATACTCCCCCCAGAACCCAAAGACTTTGATTTCTCATAAGGTGCTGAATGACTCATCATATTCTGAGGTCACCCAATCCCTAGTTGGCATCGTTTACTGTTAAGACTACAACAGTATCTGATCGTTTTTGATCCCTTAACCTTTGTTCTTGATTAATGAAAACATCCTTGGCAAATGCTTTTGCACAAGTTAGTCTTTGACCGGTCCAAGAATTTCACCTCTAGTGGTCAAATACTAATGCCCCCAACTGTCCCTATTAATCATTATGGCAACTCTAGAAACCAACAAAATAGAACCGCCAGTCCTATTTTATTA…	AY916700	331	4.71113e-138	0.9	1	409	0	0	0	0	0	0	0	0	0	0	3	0	0	1	0	0	0	0	0	0	0	0	0	0	0	0	0	0
S1196_1189	Basidiomycota	Fungi_other	CCCTATGTTGAGTCAAATCAAGCCACAAGCTCCGCTCCTGGTGATACTCTTCCATCAATTCCTTTAAGTTTCAGCCTTCCGACCATACTACCCCCAGAACCCAAAGACTTTGATTTCTCGTAAGGTGCCAAGCAACACATCATAATTGAGATCACCCAATCCCTAGTTGGCATAGTTTACTGCTAAGACTACAACAGTATCTGATCATTTTCAATCCCCTAACCTTTGTTCTTGATTAATGAAAACATCCTTGGCAAATGCTTTCACAGTAGTCAGTCTTCAGTCTTCAGTCAATCCAAGAATTTCACCTCTAGCAACTGAATACCAATGCCTCCAACTATCCCTATTAATCATTACAGCAATTCTAGAAACCAACAAAATAGAACCACATG	GU187611	309	2.49749e-128	0.91	1	390	0	0	0	0	0	0	0	0	0	4	0	0	0	0	0	0	0	0	0	0	0	0	0	0	0	0	0	0
S1196_1193	Basidiomycota	Agaricomycetes	TCCCGTGTTGAGTCAAATTAAGCCGCAGGCTCCACTCCTGGTGGTGCCCTTCCGTCAATTCCTTTAAGTTTCAGCCTTGCGACCATACTCCCCCCAGAACCCAAAGACTTTGATTTCTCGTAAGGTGCCAAGTGATACATTAAATTGAGTCCACCTGATCCCTAGTCGGCATAGTTTACTGTTAAGACTACAACGGTATCTGATCGTTTTCGATCCCCTAACCTTCGTTCTTGATTAATGAAAACATCCTTGGCAAATGCTTTCGCAGTAGTTAGTCTTCAGTAAATCCAAGAATTTCACCTCTAGCAACTGAATACTAATGCCCCTAACTATCCCTATTAATCATTACGGCAACTCTAGAAACCAACAAAATAGAACCGCACG	U59089	365	3.80419e-153	0.97	2	384	0	0	0	0	0	0	0	0	0	7	0	0	0	0	1	0	0	0	0	0	0	0	0	0	0	0	0	0
S1196_1194	Ascomycota	Leotiomycetes	CCCCCGTGTTGAGTCAAATTAAGCCGCAGGCTCCACTCCTGGTGGTGCCCTTCCGTCAATTTCTTTAAGTTTCAGCCTTGCGACCATACTCCCCCCAGAACCCAAAGACTTTGATTTCTCGTAAGGTGCCGAGCGAGTCAAAAAGATAACATCGCCCGATCCCTAGTCGGCATAGTTTATGGTTAAGACTACGACGGTATCTGATCGTCTTCGATCCCCTAACTTTCGTTCACTGATTAATGAAAACATCCTTGGCAAATGCTTTCGCAGTAGTTAGTCTTCAATAAATCCAAGAATTTCACCTCTGACAATTGAATACTGATGCCCCCGACTATCCCTATTAATCATTACGG	DQ002903	352	1.97895e-147	1	2	353	10	67	42	58	288	158	62	6	1	15	156	418	242	232	94	111	190	52	53	63	86	115	46	181	74	105	11	22
S1196_1196	Zoopagomycota	Zoopagomycetes	CCCCGTGTTGAGTCAAATTAAGCCGCAGGCTCCACTCCTGGTGGTGCCCTTCCGTCAATTCCTTTAAGTTTCAGCCTTGCGACCATACTCCCCCCGGAGCCTAGACACTTTGATTTCTCGAAAGGTGCCGAACGGGTCATCATAAAGGTAACACCGTCCGATCCCTAGTCGGCATAGTTTATGGTTAAGACTACGACGGTATCTAATCGTCTTCGATCCCCTAACTTTCGTTCTTGATTAATGAAAACATCCTTGGCAAATGCTTTCGCATTAGTTTGTCTTTAATAGATCCAAGAATTTCACCTCTGACAATTAAATACAAATGCCCCCAACTGTCCCTATTAATCATTACCTCAGTTCCTAAAAACCAACAAAATAGAACCAAGGTCCTATTCTATT…	DQ643781	371	9.0183e-156	0.95	1	410	1	0	0	0	1	0	0	0	0	0	0	1	15	3	2	2	0	0	0	0	0	11	0	9	2	0	0	0
S1196_1197	Ascomycota	Saccharomycetes	CCCCGTGTTGAGTCAAATTAAGCCGCAGGCTCCACTCCTGGTGGTGCCCTTCCGTCAATTCCTTTAAGTTTCAGCCTTGCGACCATACTCCCCCCAGAACCCAAAAACTTTGATTTCTCGTAAGGTGCTGAGCGTGTCAAAAAAAGAAACATCGCCCAATCCCTAGTCGGCATAGTTTATGGTTAAGACTACGACGGTATCTAAGCGTCTTCGATCCCCTAACTTTCGTTCTTGATTAATGAAAACATCCTTGGCAAATGCTTTCGCAGTAGTTAGTCTTCAGTAAATCCAAGAATTTCACCTCTGACAACTGAATACTGATGCCCCCGACTGTTCCTATTAATCATTACGACGGTCCTAGAAACCAACAAAATAGAACCATACG	KC254863	357	1.33478e-149	0.96	1	385	7	0	0	6	10	769	1	4	0	4	0	16	41	185	5	0	14	9	1	23	4	2	4	15	0	1	0	0
S1196_1199	Basidiomycota	Agaricomycetes	CCCCGTGTTGAGTCAAATTAAGCCGCAGGCTCCACACCTGGTGGTGCCCTTCCGTCAATTCCTTTAAGTTTCAGCCTTGCGACCATACTCCCCCCAGAACCCAAAGACTTTGATTTCTCGTAAGGTGCCAAATGACCCATATATGTGAGGTTCATCTGATCCCTAGTCGGCATAGTTTACTGTTAAGACTACAACGGTATCTGATCGTTTTCGATCCCCTAACCTTCGTCCTTGATCAATGAAAACATCCTTGGCAAATGCTTTCGCATTAGTTGGTCTTGAGTCAATCCAAGAATTTCACCTCTAGCGACTCAATACCAATGCCCCCAACTATCCCTATTAATCATTACGACAGTTCTAGAAACCAACAAAATAGAACCGCACG	AF287835	352	2.18934e-147	0.96	1	385	0	0	23	26	0	21	0	0	0	17	0	0	0	0	0	28	0	0	0	0	0	0	0	0	0	0	0	10
S1196_1200	Basidiomycota	Fungi_other	CCCCGTGTTGAGTCAAATTAAGCCGCAGGCTCCACACCTGGTGGTGCCCTTCCGTCAATTCCTTTAAGTTTCAGCCTTGCGACCATACTCCCCCCAGAACCCAAAGACTTTGATTTCTCGTAAGGTGCCGAACGACTCATCCTAAAAGCAGAGGTCGCCCGATCCCTAGTCGGCATCGTTTACTGTCAAGACTACAACGGTATCTAATCGTTTTCGATCCCTTGACCTTCGTTCTTTGTTAATGAAAACATCCTTGGCAAATGCTTTCGCACAAGTCAGTCTTCGACCGGTCCAAGAATTTCACCTCTAGCGGTCGAATACTAATGCCCCCGACTGTTCCTATTAATCATTACGGCGACTCTAGAAACCAACAAAATAGAACCGCAAG	DQ534687	328	9.45664e-137	0.93	1	386	57	39	0	0	0	0	0	0	0	12	94	0	0	15	0	0	6	0	0	2	0	0	0	0	0	0	5	0
S1196_1201	Chytridiomycota	Fungi_other	CCCCGTGTTGAGTCAAATTAAGCCGCAGGCTCCACTCCTGGTGGTGCCCTTCCGTCAATTCCTTTAAGTTTCAGCCTTGCGACCATACTCCCCCCAGACCCTAAAAACTTTGATTTCTCATACGGTGCCGAGCAAGCCAAATGCAAGCATTGCCCGATCCCGAGTCGGAATAGTTTATGGTAGAGACTACGACGGTATCTAATCGTCTTCGATCCCCCTACTTTCGTTCCTGATTAATGAAAACATCCTTGGCAAATGCTTTCGCAGTAGTTAGTCTTCAGTAAATCCAAGAATTTCACCTCTGACAACTGAATACTAATGCCCCCAACTGACCCTATTAATCATTACCCCGGTCCGATAAACCAACAAAATAAGAACCACGG	DQ536479	319	9.03751e-133	0.92	1	380	0	0	0	0	0	0	0	4	0	4	4	0	0	0	0	0	0	0	0	0	0	0	0	0	0	0	0	0
S1196_1204	Basidiomycota	Agaricomycetes	CCCCGTGTTGAGTCAAATTAAGCTGCAGGCTCCACTCCTGGTGGTGCCCTTCTGTCAATTCCTTTAAGTTTTAGCCTTGCGACCATACTCCCCCCAGAACCCAAAGACTTTGATTTCTTGTAAGGTGCTGAATGATGCATAATATTGAGGTCGTCCGATCCCTAGTTGGCATAGTTTACTGTTAAGACTACAATGGTATCTGATCATTTTCAATCCCCTAACCTTCGTTCTTGATTAATGAAAACATCCTTGGCAAATGCTTTTGCAATAGTTTGTCTTGCGTAAATCCAAGAATTTCACCTCTAGCAATGCAATACAAATGCCCCCAACTATCCCTATTAATCATTATGGCGACTCTAGAAACCAACAAAATAGAACCGCATG	U59093	351	6.05323e-147	0.96	1	381	3	0	0	0	0	0	0	0	0	0	0	0	0	0	0	0	0	0	0	0	0	20	0	0	0	0	0	0
S1196_1206	Ascomycota	Dothideomycetes	CCCCGTGTTGAGTCAAATTAAGCCGCAGGCTCCACGCCTGGTGGTGCCCTTCCGTCAATTTCTTTAAGTTTCAGCCTTGCGACCATACTCCCCCCAGAACCCAAAAACTTTGATTTCTCACAAGGTGCCGAGCGAGTCAACATAGCAACATCGCCCGATCCCTAGTCGGCATAGTTTATGGTTAAGACTACGACGGTATCTGATCGTCTTCGATCCCCTAACTTTCGTTCCTGATTAATGAAAACATCCTTGGCAAATGCTTTCGCAGTAGTTAGTCTTCAATAAATCCAAGAATTTCACCTCTGACAATTGAATACTGATGCCCCCGACTATCCCTATTAATCATTACGGCGGTCCTAGAAACCAACAAAATAGAACCGCACG	U42485	369	6.43192e-155	0.98	1	384	1	9	4	48	79	183	16	5	0	2	5	124	29	7	2	0	25	10	0	3	3	21	2	7	3	2	0	14
S1196_1207	Chytridiomycota	Chytridiomycetes	CCCCGTGTTGAGTCAAATTAAGCCGCAGGCTCCACTCCTGGTGGTGCCCTTCCGTCAATTCCTTTAAGTTTCAGCCTTGCGACCATACTCCCCCCGGAACCCAAAAACTTTGATTTCTCATAAGGTGCTGAAGGAGTCATGTATAACAACCTCCAATCCCTAGTCGGCATCGTTTATGGTTAAGACTACGACGGTATCTGATCGTCTTCGATCCCCTAACTTTCGTTCTTGATTAATGAAAACATCCTTGGCAAATGCTTTCGCAGAAGTTAATCTTTCATAAATCCAAGAATTTCACCTCTGACAATTAAATATTAATGCCCCCAACTATCCCTATTAATCATTACTTCGGTCCTAGAAACCAACAAAATAGAACCGACG	DQ536490	353	7.79981e-148	0.97	1	377	6	2	0	2	6	0	0	0	0	2	0	9	0	0	0	0	0	0	0	2	2	2	2	0	0	4	0	0
S1196_1208	Basidiomycota	Tremellomycetes	CCCCGTGTTGAGTCAAATTAAGCCGCAGGCTCCACTCCTGGTGGTGCCCTTCCGTCAATTCCTTTAAGTTTCAGCCTTGCGACCATACTCCCCCCAGAACCCAAAGACTTTGATTTCTCGTAAGGTGCCGAACGCGTCAAAAGATTAACTTCGTCCGATCCCTAGTCGGCATAGTTTACTGTTAGGACTACAACGGTATCTAATCGTTTTCGATCCCCTAACCTTCGTCCTTGATTAATGAAAACATCCTTGGCAAATGCTTTCGCAGTAGTTAGTCTTCAGTCAATCCAAGAATTTCACCTCTAGCGACTGAATACCAATGCCCCCAACTGTCCCTATTAATCATTACGGCGATCCTAGAAACCAACAAAATAGAACCGCACG	DQ645524	364	1.05498e-152	0.97	1	384	0	0	0	0	0	0	0	0	0	0	0	0	0	18	0	0	0	0	0	0	0	0	0	0	0	0	0	0
S1196_1209	Ascomycota	Fungi_other	CCCCGTGTTAAGTCAAATTAAGCTGCAGGCTCCACTCCTGGTGGTGCCCTTCCGTCAATTCCTTTAAGTTTCAGCTTTGCGACCATACTCCCCCCAGAACCCAAAAACTTTGATTTCTCTTAAGGTGCTGAGCGAGTCGATTTGATACTACGCCTGATCTCTAGTCGGCATGGTTTATGGTTAAGACTATGACAGTATCTAATCGTCTTCGATCCCTAACTTTCGTTCTTGATTAATGAAAACATCCCTGGCAAATGCTTTCACAGTAGTTAGTCTTCAATAAATCCAAGAATTTCACCTCTGACAATTGAATACTAATGCCCCCAACTATCCCTATTAATCATTACGGCAGTCCTAGAAACCAACAAAATAGGATCGACG	AY124370	320	3.23919e-133	0.93	1	373	0	0	0	0	0	0	0	0	0	0	0	66	0	0	0	0	0	0	0	0	0	0	0	0	0	0	0	0
S1196_1211		Fungi_other	CCCCGTGTTGAGTCAAATTAAGCCGCAGGCTCCACACCTGGTGGTGCCCTTCCGTCAATTCCTTTAAGTTTCAGCCTTGCGACCATACTCCCCCCCGAACCTAATTTACAGATTTCTCTCCACCTCCCGGAAAGGTCTTACAATCCCCTCCCGATCGGCAATCGGCATCGTTTACAGAAGAGACTACAACGGTATCTAATCGTTTTCGATCCCTCTTCCTTCGTCCTTGATCAATGAGAACATCCTTGGCAGATGCTTTCGCACTAGTTCGTCTTCCGACAATCCAAGAATTTCACCTCTGACGGCGGAATACGAATGCCCCCAACCATCCCTATTCATCATTACCGCAGCCTCACAAACCAACAAACAAGACCGCGCG	EU647058	293	2.9394e-121	0.89	2	379	0	0	18	0	0	0	0	0	0	0	0	0	0	0	0	0	0	0	0	0	0	0	0	0	0	0	0	0
S1196_1212	Ascomycota	Sordariomycetes	CCCGTGTTGAGTCAAATTAAGCCGCAGGCTCCACCCCTGGTGGTGCCCTTCCGTCAATTTCTTTAAGTTTCAGCCTTGCGACCATACTCCCCCTGGAGCCCAAGCACTTTGATTTCTCGAAAGGTGCCGAACGGGTCAAGTATAAACACCGTCCGATCCCTAGTCGGCATAGTTTATAGTTAAGACTACGACGGTATCTGATCGTCTTCGATCCCCTAACTTTCGTTCCTTATCAATGAAAACATCCTTGGCAAATGCTTTCGCAGTAGTTAGTCTTCAATAGATCCAAGAATTTCACCTCTGACAATTGAATACTGATGCCCCCGACTGTCCCTATTAATCATTACGGCGGTCCTAGAAACCAACAAAATAGAACCACACG	DQ471038	372	2.99761e-156	0.98	1	382	305	72	29	259	490	35	632	92	0	29	61	274	408	209	200	33	27	764	6	361	4	207	145	355	164	24	5	86
S1196_1214	Ascomycota	Dothideomycetes	CCCCGTGTTGAGTCAAATTAAGCCGCAGGCTCCACTCCTGGTGGTGCCCTTCCGTCAATTTCTTTAAGTTTCAGCCTTGCGACCATACTCCCCCCAGAACCCAAAAACTTTGATTTCTCGTAAGGTGCCGATGGAGTCAAAATGTAACATCCACCGATCCCTAGTCGGCATAGTTTACGGTCAAGACTACGACGGTATCTGGAACCATGTTAGCTAAAAACTCAAAAACATCGGAAAAGGGGAGCAGTTTCTTACCTGATCGTCTTCGATCCCCTGACTTTCGTTCACTGATTAATGAAAACATCCTTGGCAAATGCTTTCGCAGTAGTTAGTCTTCGATAAATCCAAGAATTTCACCTCTGACAATCGAATACTGATGCCCCCGACTATCCCTATTAA…	GU561841	327	3.02838e-136	0.88	2	434	3	4	5	7	1	1	5	0	0	0	4	0	1	22	3	5	4	24	0	1	2	6	5	12	0	2	5	4
S1196_1215	Ascomycota	Sordariomycetes	TCCCGTGTTGAGTCAAATTAAGCCGCAGGCTCCACCCCTGGTGGTGCCCTTCCGTCAATTTCTTTAAGTTTCAGCCTTGCGACCATACTCCCCCTGGAACCCAAAGACTTTGATTTCTCGTAAGGTGCCGAACGGGTCAAAAGATAACACCGTCCGATCCCTAGTCGGCATAGTTTATGGTTAAGACTACGACGGTATCTGATCGTCTTCGATCCCCTAACTTTCGTTCCTGATTAATGAAAACATCCTTGGCAAATGCTTTCGCAGCAGTTAGTCTTCAATAAATCCAAGAATTTCACCTCTGACAATTGAATACTGATGCCCCCGACTGTCCCTATTAATCATTACGGCGGTCCTAGAAACCAACAAAATAGAACCACGCG	AF279399	370	2.31233e-155	0.98	2	383	2	11	1	46	345	21	5	3	0	22	3	150	42	5	0	0	0	0	0	3	0	10	0	0	2	6	6	7
S1196_1217	Ascomycota	Fungi_other	CCCCGTGTTGAGTCAAATTAAGCCGCAGGCTCCACGCCTGGTGGTGCCCTTCCGTCAATTTCTTTAAGTTTCAGCCTTGCGACCATACTCCCCCCAGAATCCCACTCTGATTTCTCTTAAGGTGCCGATGGAGTCATAAAGGAAACATCCACCGATCCCTGGTCGACATAGTTTATGGTTAAGACTACGACGGTATCTGATCGTCTTCGATCCCCTAACTTTCGTTCACTGATTAATGAAAACATCCTTGGCGAATGCTTTCGCAGTAGTTAGTCTTCAATAAATCCAAGAATTTCACCTCTGACAATTGAATACTGACGCCCCCGACTATCCCTATTAATCATTACGGCTTTCCTAGAAACCAACAAAATAGGAGAGCCG	GU324001	342	5.81927e-143	0.95	1	375	0	0	1	0	3	0	0	0	0	1	0	0	5	0	0	1	0	0	0	1	0	3	0	0	0	0	0	0
S1196_1219	Chytridiomycota	Chytridiomycetes	CCCCGTGTTGAGTCAAATTAAGCCGCAGGCTCCACTCCTGGTGGTGCCCTTCCGTCAATTCCTTTAAGTTTCAGCCTTGCGACCATACTCCCCCCGGTACCCAAAGACTTTGATTTCTCATAAGGTGCCGAACGATACAAAAATATTCGTCCGATCCCTAGTCGGCATAGTTTATGGTCAAGACTACGACGGTATCTGATCGTCTTCGATCCCCTGACTTTCGTTCTTGATTAATGAAAACATCCTTGGCAAATGTTTTCGCAGAAGTTAGTCTTTCATAAATCCAAGAATTTCACCTCTGACAATTAAATACTAATGCCCCCAACTATCCCTATTAATCATTACTTCGGCCCTAGAAACCAACAAAATAGAACCAAAG	JN020240	351	5.96207e-147	0.96	1	379	31	115	57	18	14	0	0	3	0	5	11	16	5	10	4	16	60	72	25	5	13	20	2	11	4	30	42	4
S1196_1220	Basidiomycota	Agaricomycetes	CCCCATGTTGAGTCAAATTAAGCCGCAGGCTCCACTCCTGGTGGTGCCCTTCCATCAATTCCTTTAAGTTTCAGCCTTGCAACCATACTCCCCCCAGAACCCAAAGACTTTGATTTCTTGTAAGGTGCCGAACAACGCATAATATTGAGGTCGTCTGATCCCTAGTCGGCATAGTTTACTGTTAAGACTACAACAGTATCTGATCGTTTTCGATCCCCTAACCTTTGTTCTTGATTAATGAAAATATCCTTGGCAAATGCTTTTGCAATAGTTTGTCTTGTGTAAATCCAAGAATTTCACCTCTAGCAACGCAATACAAATGCCCTCAACTATCCCTATTAATCATTACAGTGACTCTAGAAACCAACAAAATAGAACCATGCGTCCTATTTTATTATT…	U59093	373	1.16281e-156	0.95	1	407	0	0	0	0	0	0	26	0	0	23	0	0	0	0	0	0	0	0	0	0	0	0	0	0	0	0	0	0
S1196_1221	Chytridiomycota	Chytridiomycetes	CCCCGTGTTGAGTCAAATTAAGCCGCAGGCTCCACTTCTGGTGTGCCCTTCCGTCAATTCCTTTAAGTTTCTAGCTTGCGCTCATACACCCCCCAGAACCCAAAGACTTTGATTTCTCATAAGGTGCCGATGGGGTCATTAAAAAACGCCCACCGATCCCTAGTCGGCATAGTTTATGGTTAGGACTACGACGGTATCTAATCGTCTTCGATCCCCTAACTTTCGTTCTTGATTAATGAAAACATCCTTGGCAAATGCTTTCGCAGAAGTTAGTCTTTCATAAATCCAAGAATTTCACCTCTGACAATTAAATACTAATGCCCCCAACTGTCCCTATTAATCATTACTTCGGTCCTAAGAACCAACAAAATAAGACCAAAGTCCTATTCCATTATTCCA…	HQ901772	350	1.77475e-146	0.93	2	403	0	0	0	1	0	3	0	0	0	0	0	1	2	0	0	0	0	0	0	0	5	2	0	0	0	0	0	0
S1196_1222	Ascomycota	Sordariomycetes	CCCCGTGTTGAGTCAAATTAAGCCGCAGGTTCCACCCCTGTGAATTTAGTTAGCAATCGATCGCCGGTTCGTTTTTTTAAGGGAGGGAGGGACAAACCTGGTGGTGCCCTTCCGTCAATTTCTTTAAGTTTCAGCCTTGCGACCATACTCCCCCCGGAGCCCAAGAACTTTGATTTCTCGAAAGGTGCCGAACGAGTCAAAAAATAACATCGTCCGATCCCTAGTCGGCATAGTTTATGGTTAAGACTACGACGGTATCTGATCGTCTTCGATCCCCTAACTTTCGTTCCTGATCAGCGAAAACGTCCTTGGCGAATGCTTTCGCAGTAGTTAGTCTTCAATAGATCCAAGAATTTCACCTCTGACAATTGAATACTGACGCCCCCGACCGTCCCTATT…	AF050482	319	1.06075e-132	0.96	97	439	0	0	0	0	0	0	0	0	0	2	0	0	0	0	0	0	0	0	0	0	0	0	0	0	0	0	0	2
S1196_1224	Chytridiomycota	Chytridiomycetes	CCCCGTGTTGAGTCAAATTAAGCCGCAGGCTCCACTCCTGGTGGTGCCCTTCCGTCAATTCCTTTAAGTTTCAGCCTTGCGACCATACTCCCCCCAGAACCCAAAAACTTTGATTTCTCGTACGGTGCCGGCGGATGCATGAAATACATTCCGCCGATCCCGAGTCGGCATAGTTTATGGTTAAGACTACGACGGTATCTAATCGTCTTCGATCCCCTAACTTTCGTTCTTGATTAATGAAAACATCCTTGGCAAATGCTTTCGCAGTAGTTAGTCTTTCGGAAATCCAAGAATTTCACCTCTGACACCGAAATACTAATGCCCCCAACTGTCCCTATTAATCATTACCTCGGTCCTAGAAACCAACAAAATAGAACCGTGG	EU154974	334	2.04188e-139	0.94	1	378	0	0	0	0	0	0	0	0	0	0	0	0	0	0	0	0	0	0	0	0	0	0	0	6	0	1	0	0
S1196_1227	Basidiomycota	Agaricomycetes	CCCCGTGTTGAGTCAAATTAAGCCGCAGGCTCCACACCTGGTGGTGCCCTTCCGTCAATTCCTTTAAGTTTCAGCCTTGCGACCATACTCCCCCCAGAACCCAAAGACTTTGATTTCTCGTAAGGTGCTGAGCAACACATATAAATGGAGTTTGCCCAATCCCTAGTCGGCATAGTTTACTGTTAAGACTACAACGGTATCTGATCGTTTTCGATCCCCTAACCTTCGTTCTTGATTAATGAAAACATCCTTGGCAAATGCTTTCGCAGTAGTTGGTCTTGAGTCAATCCAAGAATTTCACCTCTAGCGACTCAATACCAATGCCCCCAACTATCCCTATTAATCATTACGGCGACTCTAGAAACCAACAAAATAGAACCGCACG	AF287833	371	8.38853e-156	0.98	1	385	4	28	2	0	4	0	0	0	0	0	1	0	4	4	1	8	79	0	2	2	8	7	0	1	1	4	0	0
S1196_1229	Basidiomycota	Tremellomycetes	CCCCGTGTTGAGTCAAATTAAGCCGCAGGCTCCACTCCTGGTGGTGCCCTTCCGTCAATTCCTTTAAGTTTCAGCCTTGCGACCATACTCCCCCCAGAACCCAAAGACTTTGATTTCTCGTAAGGTGCCGAGAGAGGCAAGAAAATACCATCTCCCGATCCCTAGTCGGCATAGTTTACTGTTAAGACTACAACGGTATCTGATCGTTTTCGATCCCCTAACCTTCGTTCTTGATTAATGAAAACATCCTTGGCAAATGCTTTCGCAGTAGTTAGTCTTCAGTAAATCCAAGAATTTCACCTCTAGCAACTGAATACTAATGCCCCCAACTATCCCTATTAATCATTACGGCGATCCTAGAAACCAACAAAATAGAACCGCACG	DQ667162	374	3.92138e-157	0.99	8	384	0	0	0	0	0	0	0	0	0	0	0	0	0	0	0	0	17	0	0	0	0	0	0	0	0	0	0	0
S1196_1230	Basidiomycota	Agaricomycetes	CCCTGTGTTGAGTCAAATTAAGCCGCAGGCTCCACTCCTGGTGGTGCCCTTCTGTCAATTCCTTTAAGTTTCAGCCTTGCAACCATACTCCCCCCAGAACCCAAAGACTTTGATTTCTCGTAAGGTGCCGAACGACACATAAAATTGAGGTCATCTGATCCCTAGTCGGCATAGTTTACTGTTAAGACTACAATGGTATCTGATCGTTTTTGATCCCCTAACCTTCGTTCTTGATTAATGAAAACATACTTGGCAAATGCTTTCGCAATAGTTTGTCTTGCATAAATCCAAGAATTTCACCTCTAGCAACGCAACACAAATGCCCCCAACTATCCCTATTAATCATTATGGCAACTCTAGAAACCAACAAAATAGAACCGCACG	AF082845	358	4.79871e-150	0.96	1	384	1	0	0	0	0	0	0	0	0	0	0	0	0	0	0	0	0	0	9	0	0	0	0	0	0	0	0	0
S1196_1231	Fungi_other	Fungi_other	CCCCGTGTTGAGTCGAATTAAGCCGCAGGCTCCACTCCTTGTGGTGCCCTTCCGTCAATTCCTTTAAGTTTCAGCCTTGCGACCATACTCCCCCCAGAACCTGAATACTTTGATTTCTCGCAAGGTCCCGGGCGTGTCCACCATCACTTCGCCCGATCCCTAGTCGGCATCGTTTGCGGTTAAGACTACGACGGTATCTGATCGTCTTCGATCCCCTAACTTTCGCTCTTGATCAATGAAAACGTCCTGGGCAAACGCTTTCGCGGCAGTCAGCCCCCAACGGATCCACGGATTTCACTCCTCACCGTCGAGTACTCTAACCCCCGACCGTCCCTATTAATCATTACGGCCTTCCCCAGAAACCAACAAAATAGGGACGCACGTCCTATTCTATTATTC…	GU250922	293	3.17311e-121	0.86	1	405	0	0	0	0	10	0	0	0	0	0	0	0	0	3	0	0	0	0	0	0	0	0	0	0	0	0	0	0
S1196_1232	Ascomycota	Eurotiomycetes	TCCCGTGTTGAGTCAAATTAAGCCGCAGGCTCCACTCCTGGTGGTGCCCTTCCGTCAATTCCTTTAAGTTTCAGCCTTGCGACCATACTCCCCCCCGAGTCCAAAAGCTTTGATTTCTCGTAAAGTGCCGAACGGGGCATAAAAAAACCACCGTCCGATCCTTAGACGACATAGTTTATGGTTAAGACTACGACGGTATCTGATCGTCTTCGATCCCCTAACTTTCGTTCACTGATTAACGAAAACATCCTTGGCGAATGCTTTCGCAGTAGTTAGTCTTCAATAAATCCAAGAATTTCACCTCTGACAATTGAATACTGACGCCCCCGACTATCCCTATTAATCATTACAGCGGTCCTAGAAACCAACAAAATAGAACCGATGTCCTATTCTATTATT…	FJ358335	389	9.42188e-164	0.98	2	404	0	0	0	1	0	0	0	0	0	0	8	0	0	1	0	0	1	0	0	0	0	0	0	0	0	0	0	0
S1196_1233	Basidiomycota	Agaricomycetes	CCCCGTGTTGAGTCAAATTAAGCCGCAGGCTCCACTCCTGGTGGTGCCCTTCCGTCAATTCCTTTAAGTTTCAGCCTTGCGACCATACTCCCCCCAGAACCCAAAGACTTTGATTTCTCGTAAGGCGCCGAGCAACACATTCTTGGAGTTTGCCCGATCCCTAGTCGGCATAGTTTACTGTTAAGACTACAACGGTATCTGATCGTTTTCGATCCCCTAACCTTCGTTCTTGATTAATGAAAACATCCTTGGCAAATGCTTTCGCAGTAGTCAGTCTTCCGTCGATCCAAGAATTTCACCTCTAACGACGGAATACTAATGCCCCCAACTGTCCCTATTAATCATTACGGCGACTCGATAAACCAACGAAATGGAACCGCACG	DQ534679	349	4.64128e-146	0.95	1	383	0	0	1	1	0	3	0	0	0	3	1	6	4	1	0	2	0	0	0	4	2	7	1	2	1	21	0	0
S1196_1234	Chytridiomycota	Chytridiomycetes	CCCCGTGTTGAGTCAAATTAAGCCGCAGGCTCCACTCCTGGTGGTGCCCTTCCGTCAATTCCTTTAAGTTTCAGCCTTGCGACCATACTCCCCCCGGAACCTAAAAACTTTGATTTCTCTCAAGGTGCCAAACAAGTCATAAGTGAACGTTGTCTGATCCCTAGTCGGCAAAATTTATGGTTAAGACTACGACGGTATCTGATCGTCTTCGATCCCCTAACTTTCGTTCTTGATTAATGAAAACATCCTTGACAGATGCTTTCGCATATGGGCGTCTTGAGCCGATCCAAGAATTTCACCTCTGACGGCTCAGTACGAATGTCCCCAACTATCCCTATTAATCATTACTTTGGTTTCGAAAACCAACAAAATAGAACCGCACG	AF372719	331	4.36802e-138	0.93	1	378	0	0	0	0	0	0	0	0	0	0	1	0	0	3	0	0	5	0	0	0	0	0	1	0	0	0	0	0
S1196_1237	Basidiomycota	Agaricomycetes	CCCCGTGTTGAGTCAAATTAAGCCGCAGGCTCCACTCCTGGTGGTGCCCTTCCGTCAATTCCTTTAAGTTTCAGCCTTGCGACCATACTCCCCCCAGAACCCAAAGACTTTGATTTCTCGTAAGGTGCCGAACGACGCATAATATTGAGGTCGTCCGATCCCTAGTCGGCATAGTTTACTGTTAAGACTATGATCGTTTTCGATCCCCTAACCTTCGTTCTTGATTAATGAAAACATCCTTGGCAAATGCTTTCGCAATAGTT	U59093	240	5.73541e-98	0.95	1	263	781	9	15859	4958	762	1567	2295	6454	151	14276	20201	3467	16	38	2925	10784	1	5369	3810	2796	5078	7360	144	2301	822	16614	0	1267
S1196_1238	Ascomycota	Eurotiomycetes	CCCCGTGTTGAGTCAAATTAAGCCGCAGGCTCCCATTTTTAACAGGAATTACCTGATCCATCAGAATTTCTTCTGACGATGGACTATATCTTAAGCCGGTTTGTGAAAACCAACCCACATCCATTTAGTCTCTGAACCTTCCCATACTCAAAATGAATAGCAGGGCTTGGCTGCGGATTGCCCATATATCTCTCAACGTTGTGACCATACCCGAGGCAATTAACCTGGCCACTACTGTCTTTCGATCAGTAGCTTGGTAGTTGAAGCTTTAGGGGTTTCCCGCATTTTGAATGTGTTGCCCGGTTATAAAAACCAGACTAGCATTTAACTGTTTAGAGGACATCCACATCACCCTTTCAGGCTGCTTTTTGGCGCAGAGTTGCTACGGCTATAACAAAA…	AY526482	299	8.80246e-124	0.82	1	499	0	0	0	0	20	0	0	0	0	0	0	0	31	0	0	0	0	0	0	0	0	0	0	0	0	0	0	0
S1196_1239	Ascomycota	Fungi_other	CCCTGTGTTGAGTTAAATTAAGCCGCAGGCTCTACGCCTGGTGGTGCCCTTCTGTTAATTTCTTTAAGTTTTAGCCTTGCGACTATACTCCCCCTAGAACCTAAAAACTTTGATTTCTCGTAAGGTGCTGAGCGAGTTAAAAAAAGAATATCGTCTGATCCCTAGTTGGTATAGTTTACGGTTAAGACTACGACGGTATCTGATTGTCTTTGATCCCCTAACTTTCGTTTACTGATTAATGAAAACATCCTTGGTAAATGCTTTTGTAGTAGTTAGTCTTTAATAAATCTAAGAATTTTACCTCTGATAATTGAATACTGATGCCCCCGACTGTCCCTATTAATTATTACGGCGGTCCTAGAAACTAATAAAATAGAACTGTATG	U42481	318	2.52142e-132	0.92	1	379	0	0	0	3	0	0	0	0	0	0	0	0	0	0	0	0	0	0	0	0	0	0	0	0	0	0	0	0
S1196_1241	Chytridiomycota	Chytridiomycetes	CCCCGTGTTGAGTCAAATTAAGCCGCAGGCTCCACTCCTGGTGGTGCCCTTCCGTCAATTCCTTTAAGTTTCAGCCTTGCGACCATACTCCCCCCGGAACCCAAAAACTTTGATTTCTCATAAGGTGCTGAAGGAGTCATAAGTGTAACATCCTCCAATCCCTAGTCGGCATAGTTTATAGTTAGGACTACGACGGTATCTGATCGTCTTCGATCCCCTAACTTTCGTTCTTGATTAATGAAAACATCCTTGGCAAATGCTTTCGCAGAAGTTAATCTTTCATAAATCCAAGAATTTCACCTCTGACAATTAAATATTAATGCCCCCAACTATCCCTATTAATCATTACTTCGGTCCTAGAAACCAACAAAATAGAACCAAAG	DQ643792	357	1.32677e-149	0.96	1	383	0	0	0	0	0	0	0	0	0	0	0	7	2	0	0	0	0	0	0	0	0	0	0	0	0	0	0	0
S1196_1244	Zoopagomycota	Zoopagomycetes	CCCCGTGTTGAGTCAAATTAAGCCGCAGGCTCCACTCCTGGTGGTGCCCTTCCGTCAATTCCTTTAAGTTTCAGCCTTGCGACCATACTCCCCCCGGAGCCTAAAGACTTATGATTTCTCGTAAGGTGCCGAACGGGTCATAAAAAAATAACACCATCCGATCCCTAGTCGGCATAGTTTATGGTTAAGACTACGACGGTATCTAATCGTCTTCGATCCCCTAACTTTCGTTCTTGATTAATGAAAACATCCTTGACAAATGCTTTCGCAATAGTTCGTCTTTAATAGATCCAAGAATTTCACCTCTGACAATTAAATACGAATGTCCCCAACTGTCCCTATTAATCATTACCGTGGTTCCCAAAAACCAACAAAATAGAACCAGGGTCCTATTCCATT…	DQ643781	370	2.49396e-155	0.95	1	409	0	0	0	0	97	3	130	0	0	0	0	273	10	0	0	0	0	0	0	0	0	22	0	0	0	0	1	0
S1196_1246	Ascomycota	Fungi_other	CCCCGTGTTGAGTCAAATTAAGCCGCAGGCTCCACCCCTGGTGGTGCCCTTCCGTCAATTTCTTTAAGTTTCAGCCTTGCGACCATACTCCCCCAGGAGCCCAAACATTCTGATTTATCGCAAGGTGCCGGGCGGGCCACTGAATAGCACCGCCCGATCCCTGATCGGCATCGTTTATGGTTAAGACTACGACGGTATCTGATCGTCTTCGATCCCCTAACTTTCGTTCCTGATTAATGAAAACATCCTTGGCGAATGCTTTCGCAGTAGTTCGTCTTCAGCAGATCCAAGAATTTCACCTCTGACAGCTGAATACGGACGCCCCCGACTGTCCCTATCAATCATTACGGCGGTCCTAGAAACCAACAAAATAGAACCACACG	X04971	339	1.24865e-141	0.94	1	383	0	0	0	0	0	0	0	0	0	0	0	0	0	0	0	0	0	0	0	0	0	0	0	0	0	0	0	0
S1196_1251	Olpidiomycota	Olpidiomycetes	CCCCGTGTTGAGTCAAATTAAGCCGCAGGCTCCACTCCTGGTGGTGCCCTTCCGTCAATTCCTTTAAGTTTCAGCCTTGCGACCATACTCCCCCCAGAACCCAAAAACTTTGATTTCTCTCAAGGTGCCGAACGGGTCGTTTGAAACCACGTCCGATCCCTAGTCGGCATCGTTTATGGTTAAGACTACGACGGTATCTAATCGTCTTCGATCCCCTAACTTTCGTTCTTGATTAATGAAAACATCCTTGGCAAATGCTTTCGCAGTAGGCAGTCTTCAATAAATCCAAGAATTTCACCTCTGACAATTGAATACTAATGCCCCCAACCGTCCCTATTAATCATTACGACGGTCCTAGAAACCAACAAAATAGGATCGACG	AY987433	331	4.34163e-138	0.94	1	373	0	0	0	2	8	2	0	0	0	0	0	37	0	14	0	0	21	0	0	3	0	8	0	0	0	0	0	0
S1196_1255	Chytridiomycota	Chytridiomycetes	CCCCGTGTTGAGTCAAATTAAGCCGCAGGCTCCACTCCTGGTGGTGCCCTTCCGTCAATTCCTTTAAGTTTCAGCCTTGCGACCATACTCCCCCCGGAACCCAAAAACTTTGATTTCTCGAAAGGTGCCGAATCATAATAATACTAAATAAAATAATCCAATCCCTAGTCGGCATAGTTTATGGTTAAGACTACGACGGTATCTGATCGTCTTCGATCCCCTAACTTTCGTCCTTGATTAATGAAAACATCCTTGGCAAATGCTTTCGCAGAAGTTAGTCTTTCATAAATCCAAGAATTTCACCTCTGACAATTAAATACTAATGCCCCCAACTGTCCCTATTAATCATTACTTGCGTCCTAGAAACCAGCAAAATAGAACGCACG	JN020240	338	3.49414e-141	0.95	1	381	0	0	0	0	0	0	0	0	0	0	2	0	0	0	0	0	0	0	0	0	0	0	0	0	0	0	0	0
S1196_1257	Cryptomycota	Cryptomycota	TCCCGTGTTGAGTCAAATTAAGCCGCAGGCTCCACTCCTGGTGGTGCCCTTCCGTCAATTCCTTTAAGTTTCGGCCTTGCGACTATACTCCCCCCAGAACCCAAAAACTTTGATTTCTCACAAGGTGCCGATCACGTCAAAATAGACATTGACCGATCCCTAGTCGGCATAGTTTATGGTTAAGACTACGACGGTATCTGATCGCCTTCGATCCCCTAACTTTCGTTCTTGATTAATGAAAACATCCTTGGCAAATGCTTTCGCAGTAGTTAGTCTTCAACAAATCCAAGAATTTCACCTCTGACTGTTGAATACTAATGCCCCCAACTGTCCCTATTCATCATGACATTGGTCCTTAAAACCAACAAAATAGAACCAAAG	AF372713	334	2.03569e-139	0.94	1	381	2	9	0	1	0	0	1	0	0	0	3	0	0	2	3	3	0	0	0	0	0	0	0	1	0	0	0	0
S1196_1258	Basidiomycota	Agaricomycetes	CCCCGTGTAGAGCAAGTTTACACCTGGTGGTGCCCTTCCGTCAATTCCTTTAAGTTTCAGCCTTGCGACCATACTCCCCCCAGAACCCAAAGACTTTGATTTCTCGTAAGGTGCCGAGCAACACATCAATATTGAGGTTGCCCGATCCCTAGTCGGCATAGTTTACTGTTAAGACTACAACGGTATCTGATCGTTTTCGATCCCCTAACCTTCGTTCTTGATTAATGAAAACATCCTTGGCAAATGCTTTCGCAGTAGTCGGTCTTGAGTCAATCCAAGAATTTCACCTCTAGCGACTCAATACCAATGCCCCCAACTATCCCTATTAATCATTACGGCGACTCTAGAAACCAACAAAATAGAACCGCACG	DQ444854	357	1.27867e-149	1	15	371	0	0	0	0	0	0	0	0	0	0	2	0	12	0	0	0	0	0	0	0	0	0	0	0	0	0	0	0
S1196_1260	Ascomycota	Laboulbeniomycetes	CCCCGTGTTGAGTCAAATTAAGCCGCAGGCTCCACGCCTGGTGGTGCCCTTCCGTCAATTTCTTTAAGTTTCAGCCTTGCGACCATACTCCCCCCAGAACCCAAAAACTTTGATTTCTCATAAGGTGCTGAGTGAGTCATGATAGAAACACCACCCAATCCCTAGTTGGCATAGTTTACAGTTAAGACTACGACGGTATCTGATCGTCTTCGATCCCCTAACTTTCGTTCCTGATTAATGAAAACATCTTTGGCAAATGCTTTCGCAGTAGTTAGTCTTTGATAAATCCAAGAATTTCACCTCTGACAATCAAATACTGATGCCCCCAACTATCCCTATTAATCATTATGGTGGTCCTAAAAACCAACAAAATAGAACCACACA	FJ176839	353	7.87094e-148	0.96	1	383	0	33	0	0	0	0	0	0	0	0	0	0	2	0	0	0	0	0	0	0	0	0	0	0	0	0	0	0
S1196_1262	Mucoromycota	Mucoromycetes	CCCCGTGTTGAGTCAAATTAAGCCGCAGGCTCCACTCCTGGTGGTGCCCTTCCGTCAATTCCTTTAAGTTTCAGCCTTGCGACCATACTCCCCCCGGAACCCAAAAACTTTGATTTCTCATAAGGTGCCAAATGAGTCAAAAAATTAACTACATCTGATCCCTAGTCGGCATAGTTTATGGTTAAGACTACGACGGTATCTGATCGTCTTCGATCCCCTAACTTTCGTTCTTGATTAATGAAAACATCCTTGGCAAATGCTTTCGCAGAAGTTAGTCTTTCATAAATCCAAGAATTTCACCTCTAGCTACTAAATACTAATGCCCCCAACTATCCCTATTAATCATTACTTCGGCCCTAGAAACCAACAAAATAGAACCGAGG	AY360747	369	6.41254e-155	0.98	1	383	5	15	1	9	3	0	0	1	0	3	0	18	0	1	0	0	0	0	0	0	0	0	0	0	0	0	7	3
S1196_1264	Ascomycota	Fungi_other	TCCCATGTTGAGTCAAATTAAGCTGCAGGCTCCACCCCTGGTGGTGCCCTTCCGTCAATTCCTTTAAGTTTCAGCCTTGCGACCATACTCCCCCAGAACCCAAAACACTTTGGTTTCCCTTGGGGTGCTGAGCGAGTCACGAAATTAACATCGCCCAATTCCCAGTCAGCATAGTTTATGGTTGAGACTACGACGGTATCTGATCATCTTCAATCCCCCAACTTTCGTTCTTGATTAATGAAAACATCCTTGGCAAATGCTTTTGCAGTAGTTCGTCTTCAATAAATCCAAGAATTTCACCTCTGACAATTGAATACGAATGCCCCCAACTATCCCTATTAATCATTATGGTGGTCCCAGAAACCAACAAAATAGAACTGCTG	U53386	317	6.9504e-132	0.92	2	381	0	0	0	0	0	0	0	0	0	0	0	0	53	0	0	0	0	0	0	0	0	0	0	0	0	0	0	0
S1196_1266	Basidiomycota	Agaricomycetes	CCCCATGTTGAGCCAAATTAAGCTGCAGGCTCCACTCCTGGTGGTGCCCTTCCGTCAATTCCTTTAAGTTTCAGCCTTGCAACCATACTCCCCCCAGAACCCAAAGACTTTGATTTCTCGTAAGGTGCCGAGCGACACATCAAATTGAGGTCGCCCAATCCCTAGTCGGCATAGTTTACTGTTAAGACTACAATGGTATCTGATCGTTTTTGATCCCCTAACCTTTGTTCTTGATTAATGAAAACATCCTTGGCAAATGCTTTCGCAATAGTTAGTCTTCAGTAAATCCAAGAATTTCACCTCTAGCAACTGAATACTAATGCCCCCAACTGTCCCTATTAATCATTACGGCGACTCTAGAAACCAACAAAATAGAACCGCACG	EF053577	368	1.7837e-154	0.97	1	384	0	0	0	0	0	1	0	0	0	0	0	0	0	0	0	0	0	0	0	0	0	2	0	0	0	2	0	0
S1196_1269	Ascomycota	Saccharomycetes	CCCCGTGTTGAGTCAAATTAAGCCGCAGGCTCCACTCCTGGTGGTGCCCTTCCGTCAATTCCTTTAAGTTTCAGCCTTGCAACCATACTCCCCCCAGAACCCAAAAACTTTGATTTCTCGTAAGGTGCCGGAGAGGTTATTGTAACGCCCTCCGATCCCTAGTCGGCATAGTTTACGGTTAAGACTACGACGGTATCTGATCGTCTTCGATCCCCTAACTTTCGTTCTTGATTAATGAAAACGTCCTTGGCAAATGCTTTCGCAGTAGTTAGTCTTCAGTAAATCCAAGAATTTCACCTCTGACAACTGAATACTGATGCCCCCGACCGTCCCTATTAATCATTACGACGGTCCTAGAAACCAACAAAATAGAACCATACG	AY987461	371	8.28777e-156	0.98	1	381	0	0	0	0	28	0	91	0	0	0	0	21	23	0	0	0	0	0	0	0	0	0	28	0	0	0	0	0
S1196_1270	Basidiomycota	Agaricomycetes	CCCTGTGTTGAGTCAAATTAAGCCACAGGCTCCACTCCTGGTGGTGCCCTTCCATCAATTCCTTTAAGTTTCAGCCTTGCGACCATACTCCCCCCAGAACCCAAAGACTTTGATTTCTCGTAAGGTGCCGAACAACGCATAATATTGAGGTCATCCGATCCCTAGTTGGCATAGTTTACTGTTAAGACTACAATGGTATCTGATCGTTTTCGATCCCCTAACCTTCGTTCTTGATTAATGAAAACATCCTTGGCAAATGCTTTCGCAATAGTTTGTCTTGCATAAATCCAAGAATTTCACCTCTAGCAACGCAATACAAATGCCCCCAACTATCCCTATTAATCATTACGGCGACTCTAGAAACCAACAAAATAGAACCGCACG	U59093	364	1.05498e-152	0.97	1	384	0	0	0	11	0	0	0	0	0	0	0	0	0	0	0	0	0	0	0	0	0	55	0	0	0	0	0	1
S1196_1271	Basidiomycota	Agaricomycetes	CCCCGTGTTGAGTCAAATTAAGCCGCAGGCTCCACACCTGGTGGTGCCCTTCCGTCAATTCCTTTAAGTTTCAGCCTTGCGACCATACTCCCCCCAGAACCCAAAGACTTTGATTTCTCGTAAGGTGCTGAACGACCCATTAAATGTGAGGTTCGTCCAATCCCTAGTCGGCATAGTTTACTGTTAAGACTACAACGGTATCTGATCGTTTTTGATCCCCTAACCTTCGTCCTTGATTAATGAAAACATCCTTGGCAAATGCTTTCGCACTAGTTGGTCTTGAGTCAATCCAAGAATTTCACCTCTAGCGACTCAATACCAATGCCCCCAACTATCCCTATTAATCATTACGGTGACTCTAGAAACCAACAAAATAGAACCACACG	AY916697	362	8.16228e-152	0.97	1	386	0	15	0	0	0	2	0	55	2	2546	2	0	0	6	1	0	0	0	0	0	0	2	1	0	0	0	1	0
S1196_1272	Glomeromycota	Glomeromycetes	CCCCGTGTTGAGTCAAATTAAGCCGCAGGCTCCACCTCTGGTGGTGCCCTTCCGTCAATTCCTTTAAGTTTCAGCCTTGTGACCATACTCCCCCAGAACCCAAACACTTTGGTTTCCCGTAAGGCGCCGAACGAGTCATTAAAAAATTAACTTCGTCTGATCCCTAGTCGGCATAGTTTATGGTTAAGACTACGACGGTGTCTGATCGTCTTCAATCCCCTAACTTTCGTTCTTGATTAATGAAAACATCCTTGGCAAATGCTTTCGCAGAAGTTAGTCTTCAATAAATCCAAGAATTTCACCTCTGACAATTGAATACTAATGCCCCCAACTATCCCTATTAATCATTACGGTGATCCTAGAAACCAACAAAATAGAACCATGCGTCCTATTTCATTA…	EF136887	387	7.34893e-163	0.97	1	409	0	25	7	0	18	0	0	0	0	0	0	0	2	0	0	0	7	0	0	0	3	1	0	0	0	0	1	0
S1196_1275	Basidiomycota	Agaricomycetes	CCCCGTGTTGAGTCAAATTAAGCCGCAGGCTCCACTCCTGGTGGTACCCTTCCATCAATTCCTTTAAGTTTCAGCCTTGTAACCATACTCCCCCCAGAACCCAAAGACTTTTGATTTCTCGTAAGGTGCCGAACGACGCATAATATTGAGGTTGTCCGATCCCTAGTTGGCATAGTTTACTGTTAAGACTACAACGGTATCTGATCGTTTTCAATCCCCTAACCTTCATTCTTGATTAATGAAAACATCCTTGGCAAATGCTTTCGCAATAGTTTGTCTTGCATAAATCCAAGAATTTCACCTCTAGCAACGCAATACAAATGCCCCCAACTATCCCTATTAATCATTACGGTGACTCTAGAAACCAACAAAATAGAACCACATG	U59093	354	2.84677e-148	0.96	1	380	0	0	0	3	0	0	0	0	0	0	0	0	0	0	0	0	0	0	0	0	0	11	0	0	0	0	0	1
S1196_1276	Ascomycota	Sordariomycetes	CCCCGTGTTGAGTCAAATTAAGCCGCAGGCTCCACCCCTGGTGGTGCCCTTCCGTCAATTTCTTTAAGTTTCAGCCTTGCGACCATACTCCCCCCAGAACCCAGAAACTTGTGCTTTCGCGTAAGGTGCCGAACAGGCCAGAGTAGCACTGTCCGATCCCTAGTCGGCATAGTTTATGGTTAGGACTACGACGGTATCTGATCGTCTTCGATCCCCTAACTTTCGTTCCTGATTAATGAAAACATCCTTGGCAAATGCTTTCGCAGTAGTTAGTCTTCAGTAGATCCAAGAATTTCACCTCTGACTACTGAATACTGAAGCCCCCGACTGTCCCTATTAATCATTACGGCGGTCCTAAAAACCAACGAAACAGAACCGCACG	AY497513	349	4.62726e-146	0.95	1	382	22	0	69	5	0	1	0	0	0	0	40	12	0	0	11	0	0	2	23	0	0	0	7	108	61	9	0	2
S1196_1278	Chytridiomycota	Chytridiomycetes	CCCCGTGTTGAGTCAAATTAAGCCGCAGGTTCCACGCCTGGTGGTGCCCTTCCGTCAATTCCTTTAAGTTTCAGCCTTGCGACCATACTCCCCCCGGTACCCAAAGACTTTGATTTCTCATAAGGTGCCGAACGTGTCATGATAACAACGTCCGATCCCTAGTCGGCATAGTTTATGGTTAAGACTACGACGGTATCTAATCGTCTTCGATACCCTAACTTTCGTTCTTGATTAATGAAAACATCCTTGGCAAATGCTTTCGCAGAAGTTAGTCTTTCATAAATCCAAGAATTTCACCTCTGACAATTAAATACTAATGCCCCCAACTGTCCCTATTAATCATTACTTGGGTCCTAGAAACCAACAAAATAGAACCAAAG	DQ536484	362	8.01565e-152	0.97	1	380	0	5	0	0	1	0	0	12	0	9	4	21	0	0	0	0	1	0	0	0	0	0	0	0	0	0	4	0
S1196_1279	Basidiomycota	Agaricomycetes	CCCCGTGTTGAGTCAAATTAAGCCGCAGGCTCCACACCTGGTGGTGCCCTTCCGTCAATTCCTTTAAGTTTCAGCCTTGCGACCATACTCCCCCCAGAACCCAAAGACTTTGATTTCTCGTAAGGTGCCGAACCACACATATAGTTTGAGCTGGTCCGATCCCTAGTCGGCATAGTTTACTGTTAAGACTACAACGGTATCTGATCGTTTTCGATCCCCTAACCTTCGTTCTTGATTAATGAAAACATCCTTGGCAAATGCTTTCGCAGTAGTTGGTCTTGAATCAATCCAAGAATTTCACCTCTAGCGATTCAATACCAATGCCCCCAACTATCCCTATTAATCATTACGGCGACTCTAGAAACCAACAAAATAGAACCGCACG	KJ137269	369	6.45129e-155	0.97	1	385	16	0	0	0	0	0	0	0	0	6	0	0	0	39	0	0	0	0	0	0	0	4	0	11	0	0	0	0
S1196_1283	Basidiomycota	Pucciniomycetes	CCCCGTGTTGAGTCAAATTAAGCCGCAGGCTCCACACCTTGTGGTGCCCTTCCGTCAATTCCTTTAAGTTTCAGCCTTGTGACCGTACTCCCCCACGAACCTAAACTTCAGGTTTCCCTTTGGGTGCCAAACAGGTCATTATGAAACCTTGTCTGATCCCCAGTCGGCATAGTTTACTGTTAAGACTACAACGGTATCTGATCGTTTTTGATCCCCTAACCTTCGTTCTTGATCAATGAAAACATCCTTGGCAAATGCTTTCGCAGTAGTTTGTCTTACATCAATCCAAGAATTTCACCTCTGACGATATAATACAAATGCCCCCAACTATCCCTATTAATCATTACGGCGATCCTAGAAACCAACAAAATAGAACCGCACG	U77064	362	8.06453e-152	0.97	1	382	0	1	0	3	1	0	0	0	0	0	0	0	1	8	0	0	6	0	0	0	0	0	0	5	0	0	4	2
S1196_1287		Fungi_other	CCCCGTGTTGAGTCAAATTAAGCCGCAGGCTCCACTCCTGGTGGTGCCCTTCCGTCAATTCCTTTAAGTTTCAGCCTTGCGACCATACTCCCCCCGGAACCCAAAAACTTTGATTTCTCATAAGGTGCCGAACAAGTCAAAAATTTTTCTTGTCCGATCCCTAGTCGGCATAGTTTATGGTTAAGACTACGACGGTATCTGATCGTCTTCGATCCCCTAACTTTCGTTCTTGATTAATGAAAACATCCTTGGCAAATGCTTTCGCAGAAGTTCGTCTTCCAAAAATCCAAGAATTTCACCTCTGACATTGGAATACGAATGCCCCCAACTATCCCTATTAATCATTACTTCAGTCCTAGAAACCAACAAAATAGAACCAAAGTCCTATTCCATTATTCC…	EF014367	371	8.89235e-156	0.96	2	405	12	196	20	17	18	2	0	0	0	0	2	14	2	5	0	0	1	5	0	1	0	3	2	7	0	0	30	6
S1196_1289	Ascomycota	Sordariomycetes	CCCCGTGTTGAGTCAAATTAAGCCGCAGGCTCCACTCCTGGTGGTGCCCTTCCGTCAATTTCTTTAAGTTTCAGCCTTGCGACCATACTCCCCCAGGAGCCCAAACATTTTGATTTGTCGTAAGGTGCCGAACGAGTCAAAAGAATAACGTCGTCCGATCCCTAATCGGCATGGTTTATGGTTAAGACTACAACGGTATCTGATCGTTTTCGATCCCCTAACTTTCGTTCCTGATTAATGGAAACATCCTTGGCGAATGCTTTCGCAGTAGTTAGTCTTCAACCGGTCCAAGAATTTCACCTCTGACGGTTGAATACTGACGCCCCCGACTGTCCCTATCAATCATTACGGCGGTCCTAGAAACCAACAAAATAGAACCACGCG	AY502933	350	1.67868e-146	0.95	1	384	5	6	5	6	0	5	1	1	0	6	23	0	1	13	3	16	15	18	13	2	1	9	3	12	5	11	1	5
S1196_1291	Chytridiomycota	Chytridiomycetes	CCCCGTGTTGAGTCAAATTAAGCCGCAGGCTCCACTCCTGGTGGTGCCCTTCCGTCAATTCCTTTAAGTTTCAGCCTTGCGACCATACTCCCCCCAGAATCCAAAAACTTTGATTTCTCATACGGTGCCGATGAGGACATTAAAATAACACCCACCGATCCCGAGTCGACATAGTTTATGGTTGAGACTACGACGGTATCTGATCGTCTTCGATCCCCCAACTTTCGTTCTTGATTAATGAAAACATCCTTGGCAAATGCTTTCGCAGAAGTTAGTCTTTCATAAATCCAAGAATTTCACCTCTGACTATGGAATACTAATGCCCCCAACTGTCCCTATTAATCATTACTTCATCTCTCAAACCAACACAATAGAAACAAAGTCCTATTTCATTATTCC…	EU154974	351	6.43611e-147	0.94	1	405	0	0	0	0	8	0	51	0	0	0	0	6	3	0	0	0	0	0	0	0	0	0	9	0	0	0	0	0
S1196_1292	Basidiomycota	Agaricomycetes	CCCCGTGTTGAGTCAAATTAAGCCGCAGGCTCCACACCTGGTGGTGCCCTTCCGTCAATTCCTTTAAGTTTCAGCCTTGCGACCATACTCCCCCCAGAACCCAAAGACTTTGATTTCTCGTAAGGTGCCGAACAACACATAAAAGTGAGATTGTCCGATCCCTAGTCGGCATAGTTTACTGTTAAGACTACAACGGTATCTGATCGTTTTCGATCCCCTAACCTTCGTTCTTGATTAATGAAAACATCCTTGGTAAATGCTTTCGCAATAGTTAGTCTTGAGTAAATCCAAGAATTTCACCTCTAGCAACTCAATACTAATACCCCCAACTGTCCCTATTAATCATTACGGCGACTCTAAAAACCAACAAAATAGAACCGCACG	DQ898719	370	2.31932e-155	0.98	1	384	38	39	35	601	66	227	102	1	0	11	0	2	16	159	14	10	286	34	160	338	1847	514	151	27	7	357	1	126
S1196_1293	Basidiomycota	Agaricomycetes	CCCCGTGTTGAGTCAAATTAAGCCGCAGGCTCCACTCCTGGTGGTGCCCTTCCGTCAATTCCTTTAAGTTTCAGCCTTGCGACCATACTCCCCCCAGAACCCAAAGACTTTGATTTCTCGTAAGGTGCCGAGCGACACATCAAAAGGAGGTCGCCCGATCCCTAGTCGGCATAGTTTACTGTCAAGACTACAACGGTATCTGATCGTTTTCGATCCCCTGACCTTCGTTCTTGATTAATGAAAACATCCTTGGCAAATGCTTTCGCAGTAGTTAGTCTTCCGTAAATCCAAGAATTTCACCTCTAGCAACGGAATACTAATGCCCCCAACTGTCCCTATTAATCATTACGGCGACTCTAGAAACCAACAAAATAGAACCGCACG	GU187634	374	3.92138e-157	0.98	1	384	91	3	9	7	4	5	3	1	0	3	3	8	10	17	2	3	157	2	64	193	493	68	2	8	0	44	2	0
S1196_1294	Basidiomycota	Agaricomycetes	CCCTGTGTTGAGTCAAATTAAGCCGCAGGCTCCACTCCTGGTGGTGCCCTTCCATCAATTCCTTTAAGTTTCAGCCTTGCGACCATACTCCCCCCAGAACCCAAAGACTTTGATTTCTCGTAAGGTGCCGAGTGACACATCAAATTGAGGTTGCCCGATCCCTAGTTGGCATAGTTTACTGTTAAGACTACAACGGTATCTGATCGTTTTCGATCCCCTAACCTTCATTCTTGATTAATGAAAACATCCTTGGCAAATGCTTTCACAATAGTTAGTCTTCAGTAAATCCAAGAATTTCACCTCTAGCAACTGAATACTATTGCCCCCAACTGTCCCTATTAATCATTACAGCGACTCTAGAAACCAACAAAATAGAACCGCACGTCCTATTTCATTATT…	FJ171727	387	7.28717e-163	0.97	1	405	0	0	0	0	0	0	0	0	0	0	0	0	0	0	0	0	0	0	0	0	0	4	0	0	0	6	0	0
S1196_1296	Ascomycota	Pezizomycetes	CCCCGTGTTGAGTCAAATTAAGCCGCAGGCTCCACTCCTGGTGGTGCCCTTCCGTCAATTCCTTTAAGTTTCAGCCTTGCGACCATACTCCCCCCAGAACCCAAAGACTTTGATTTCTCGCAAGGTTCCGAGCGAGTCAAAAGAAAAACATCGCCCGATCCCTAGTCGGCATAGTTTATGGTTGAGACTACGACGGTATCTGATCGTCTTCGATCCCTCAACTTTCGTTCCTGATTAATGAAAACATCCTTGGCAAATGCTTTCGCAGTAGTTCGTCTTCAATAAATCCAAGAATTTCACCTCTGACAATTGAATACGGATGCCCCCGACTATCCCTATTAATCATTACGGCGGTCCTAGAAACCAACAAAATAGAACCACACG	DQ062996	380	8.62097e-160	0.99	1	384	1	0	2	113	49	78	7	0	0	0	1	0	385	17	0	0	0	0	0	1	0	11	5	0	0	0	1	25
S1196_1297	Ascomycota	Fungi_other	CCCCGTGTTGAGTTAAATTAAGCCGCAGGCTCCACGCCTGGTGGTGCTCTTCCGTCAATTTCCTTAAGTTTCATCCTTGCGAACATACTCCCCCCAGAACCCAACAACTCAGATTTCTCGCAAGGTGCCGAAAGAGTTTAAATGGACTCTTCCGATCCCTGGTCGGCATAGTTTACGGTCAAGACTACGACGGTATCTGATCGTCTTCGATCCCCTGACTTTCGTTCACTGATTAATGAAAACATCCTTGGCGAATGCTTTCGCATCGGTTCGTCTTCAGCAAATCCAAGAATTTCACCTCTGACAGCTGAATACGGACGCCCCCGACTGTTCCTTTTAATCATTACGGCGGTCCTAGAAACCAACAAAATAGAACCGCACG	FJ358352	316	1.92166e-131	0.91	1	382	0	0	0	0	0	0	0	0	0	0	0	0	0	0	0	0	3	0	0	0	0	0	0	0	0	0	0	0
S1196_1298	Chytridiomycota	Chytridiomycetes	TCCCGTGTTGAGTCAAATTAAGCCGCAGGCTCCACTCCTGGTGGTGCCCTTCCGTCAATTCCTTTAAGTTTCAGCCTTGCAACCATACTCCCCCCGGTACCCAAAGACTTTGATTTCTCCTAAGGTGCCGAACGAGTCATTAAATACATCGTCCGATCCCTAGTCGGCATAGTTTATGGTCAGGACTACAACGGTATCTAATCGTTTTTGATCCCCTGACTTTCGTCCTTGATTAATGAAAACATCTTTGGCAAATGCTTTCGCAGAAGTTAGTCTTTCGTAAATCCAAGAATTTCACCTCTGACAACTAAATACTAATGCCCCCAACTATCCCTATTAATCATTACTTCAGTCCTAGAAACCAACAAAATAGAACTCAAG	DQ536484	340	4.47537e-142	0.95	2	381	0	0	0	0	0	0	0	9	0	2	4	0	0	0	1	0	38	25	0	1	0	0	0	0	0	0	0	0
S1196_1299	Chytridiomycota	Chytridiomycetes	CCCCGTGTTGAGTCAAATTAAGCCGCAGGCTCCACTCCTGGTGGTGCCCTTCCGTCAATTCCTTTAAGTTTCAGCCTTGCGACCATACTCCCCCCGGAACCTAAAAACTTTGATTTCTCGTAAGGTGCCAAGCGAGTCAGAAAAATAACATCGCCCGATCCCTAGTCGGCATAGTTTATGGTTAAGACTACGACGGTATCTGATCGTCTTCGATCCCCTAACTTTCGTTCTTGATTAATGAAAACATCCTTGGCAAATGCTTTCGCAGAAGTTAGTCTTTCCTAAATCCAAGAATTTCACCTCTGACAAGGAAATACTAATGCCCCCAACTATCCCTATTAATCATTACTTCGGTCCTAGAAACCAACAAAATAGAACCAAAG	DQ643792	363	2.91684e-152	0.97	1	383	1	1	2	2	1	4	0	0	0	0	3	4	0	6	1	2	3	15	3	0	4	2	0	0	3	1	1	0
S1196_1301	Chytridiomycota	Chytridiomycetes	CCCCGTGTTGAGTCAAATTAAGCCGCAGGCTCCACTCCTGGTGGTGCCCTTCCGTCAATTCCTTTAAGTTTCAGCCTTGCGACCATACACCCCCCAGAACCCAAAAACTTTGATTTCTCATAAGGTGCCAACGGGGTCTTGAAACACACCCGCTGATCCCTAGTCGGCATAGTTTATGGTTAGGACTACGACGGTATCTGATCGTCTTCGATCCCCTAACTTTCGTTCTTGATTAATGAAAACATCCTTGGCAAATGCTTTCGCAGAAGTTAGTCTTTCATAAATCCAAGAATTTCACCTCTGACAATTAAATACTAATGCCCCCAACTGTCCCTATTAATCATTACTTCGGTCCTAGAAACCAACAAAATAAGACCAAAG	EU154974	343	2.0984e-143	0.95	1	381	8	0	0	3	0	0	0	0	0	1	16	0	6	1	0	0	0	9	0	0	1	2	1	0	0	0	0	0
S1196_1302	Basidiomycota	Agaricomycetes	CCCCGTGTTGAGTCAATTTGCTGTGTTTCACTCCTGGTGGTGCCCTTCCGTCAATTCCTTTAAGTTTCAGCCTTGCGACCATACTCCCCCCAGAACCCAAAGACTTTGATTTCTTGTAAGGTGCCGAACAACACATAATATTGAGGTCGTCCGATTCCTAGTTGGCATAGTTTACTGTTAAGACTACAATGGTATCTGATCGTTTTCGATCCCCTAACCTTCGTTCTTGATTAATGAAAACATCCTTGGCAAATGCTTTCGCAATAGTTTGTCTTGCATAAATCCAAGAATTTCACCTCTAGCAATGCAATACAAATGCCCCCAACTATCCCTATTAATCATTACGGCGACTCTAGAAACCAACAAAATAGAACCGCACG	AF082845	342	5.80158e-143	0.95	1	380	0	0	0	0	0	0	0	0	0	0	0	0	0	0	0	0	0	0	0	0	0	0	0	22	0	0	0	0
S1196_1303	Blastocladiomycota	Blastocladiomycetes	CCCCGTGTTGAGTCAAATTAAGCCGCAGGCTCCACTCCTGGTGGTGCCCTTCCGTCAATTCCTTTAAGTTTCAGCCTTGCGACCATACTCCCCCCAGAACCCAAAGACTTTGATTTCTCATACGGTGCTGATAGAGTCAAAAATATAAACATCTACCAATCCCGAGTCGGCATAGTTTATGGTCAAGACTACAAGGGTGTCTAATCCTTTTCGATCCCCTGACTTTCGTTCTTGATTAATGAAAACATCCTTGGCAAATGCTTTCGCAGAAGTTAGTCTTTCATAAATCCAAGAATTTCACCTCTGACAATTAAATACTAATGCCCCCAACTATCCCTATTAACCATTACTTTAGTCCTAGAAACCAACAAAATAGAACCAAAG	DQ536472	370	2.31932e-155	0.98	1	384	0	0	0	17	3	1	8	0	0	0	0	7	6	0	0	0	15	0	0	0	0	0	0	0	1	3	0	2
S1196_1304	Chytridiomycota	Chytridiomycetes	CCCCGTGTTGAGTCAAATTAAGCCGCAGGCTCCACACCTGGTGGTGCCCTTCCGTCAATTCCTTTAAGTTTCAGCCTTGCGACCATACTCCCCCCGGAACCCAAAAACTTTGATTTCTCATAAGGTGCCGAGCGGGTCGTTATAACACCGCCCGATCCCTAGTCGGCATAGTTTATGGTTAAGACTACGACGGTATCTGATCGTCTTCGATCCCCTAACTTTCGTTCTTGATCAATGAAAACATCCTGGACAGATGCTTTCGCAGAAGTTAGTCTTTCATAAATCCAAGAATTTCACCTCTGACAATTAAATACTAATGCCCCCGACTATCCCTATTAATCATTACTTCGGTCCTAGAAACCAACAAAATAGAACCAAAG	DQ536473	358	4.74089e-150	0.97	1	380	8	7	1	0	0	0	0	0	0	0	22	0	0	4	3	12	1	0	1	0	0	3	0	1	1	7	0	0
S1196_1306	Ascomycota	Fungi_other	CCCCGTGTTGAGTCAAATTAAGCCGCAGGCTCCACGCCTGGTGGTGCCCTTCCGTCAATTTCTTTAAGTTTCAGCCTTGCGACCATACTCCCCCCAGAACCCAAACACTTTGATTTCTCGTAAGGTGCCGAGCGGGGCAAAATAGATGCCCGCCCGATCCCTAGTCGGCATAGTTTACAGGCTTAGGACTACGACGGTATCTGATCGTCTTGGATCCCCTAACTTTCGTTCGCTGATTAATGAAAACATCTTTGGCAAATGCTTTCGCAGTGGTTAGTCTCGGGGCGATCCAAGAATTTCACCTCTGACGCCCCGATACTGATGCCCCCAACCATCCCTGTTAATCATTACGGCGGTCCTAGAAACCAACAAAATAGGATCGCACG	GQ925831	321	1.18579e-133	0.92	1	386	0	0	0	0	0	0	0	0	0	0	0	0	0	0	0	0	0	0	0	0	0	0	0	0	0	2	0	0
S1196_1307	Ascomycota	Pezizomycetes	CCCCGTGTTGAGTCAAATTAAGCCGCAGGCTCCACTCCTGGTGGTGCCCTTCCGTCAATTCCTTTAAGTTTCAGCCTTGCGACCATACTCCCCCCAGAACCCAAAAACTTTAATTTCTCGTAAGGTGCTGAGCAACTCAAATAACACAGTCGCCCAATCCCTAGTCGGCATAGTTTATGGTTGAGACTACGACGGTATCTGATCGTCTTCGATCCCTCAACTTTCGTTCCTGATTAATGAAAACATCCTTGGCAAATGCTTTCGCAGTAGTTCGTCTTCGAAAAATCCAAGAATTTCACCTCTGACAATCGAATACGGATGCCCCCGACTATCCCTATTAATCATTACGGCGGTCCTAGAAACCAACAAAATAGAACCGCACGTCCTATTTCATTATTC…	DQ646531	402	1.6514e-169	0.99	1	406	0	0	0	2	0	0	0	0	0	0	1	0	0	0	0	0	0	0	0	0	0	2	0	0	0	0	0	0
S1196_1308	Chytridiomycota	Chytridiomycetes	CCCCGTGTTGAGTCAAATTAAGCCGCAGGCTCCACTCCTGGTGGTGCCCTTCCGTCAATTCCTTTAAGTTTCAGCCTTGCGACCATACTCCCCCCAGAACCCAAAAACTTTGATTTCTCGTAAGGTGCCGAGCGTGTCCTTAAATCAACATCGCCCGATCCCTAGTCGGCATAGTTTACGGTTAAGACTACGACGGTATCTGATCGTCTTCGATCCCCTAACTTTCGTTCTTGATTAATGAAAACATCCTTGGTAAATGCTTTCGCAGAAGTTAGTCTTTCATAAATCCAAGAATTTCACCTCTGACAATGGAATACTAATACCCCCAACTATCCCTATTAATCATTACTTTATTTCTAAAACCAACAAAATAGAAACAAAG	JN020240	341	1.6187e-142	0.94	1	382	0	0	0	3	0	28	0	0	0	0	1	8	2	4	1	4	2	0	0	0	0	4	2	1	0	1	0	0
S1196_1310	Ascomycota	Sordariomycetes	CCCCGTGTTGAGTCAAATTAAGCCGCAGGTTCCACCCCTGGTGGTGCCCTTCCGTCAATTTCTTTAAGTTTCGGCCTTGCGACTATACTCCCCCCAGAACCCAGAAACTTGTACTTTCGTGTAAGGTGCCGAACGCGTCGTTAAATAACATCGTCCGATCCCTGGTCGGCATAGTTTATGGTTAAGACTACGACGGTATCTGATCGTCTTCGATCCCCTAACTTTCGTTCCTGATTAATGAAAACATCCTTGGCAAATGCTTTCGCAGTAGTTAGTCTTCAATAAATCCAAGAATTTCACCTCTGACAATTGAATACTGATGCCCCCGACTGTCCCTATTAATCATTACGGCGGTCCTAGAAACCAACAAAATAGAACCGCACG	DQ836897	368	1.7837e-154	0.97	1	384	0	0	0	0	0	0	11	4	0	2	0	0	0	0	0	0	0	0	1	0	0	0	2	2	0	0	0	0
S1196_1312	Chytridiomycota	Chytridiomycetes	CCCCGTGTTGAGTCAAATTAAGCCGCAGGCTCCACTCCTGGTGGTGCCCTTCCGTCAATTCCTTTAAGTTTCAGCCTTGCGACCATACTCCCCCCGGAACCCAAAAACTTTGATTTCTCTCAAGGTGCCAAACGAGTCAATATAATTTATACATCGTCTGATCCCTAGTCGGCATAGTTTATGGTTAAGACTACGACGGTATCTGATCGTCTTCGATCCCCTAACTTTCGTTCTTGATTAATGAAAACATCCTTGACGAATGCTTTCGCAGAAGTTAGTCTTTTGTCAATCTAAGAATTTCACCTCTGACAACAAAATACTAACGTCCCCAACTATCCCTATTAATCATTACTTTGGTCCTAGAAGCCAACAAAATAGAACCAAAAG	FJ848516	340	4.55699e-142	0.94	1	385	0	0	0	0	10	0	0	0	0	0	0	0	18	0	1	0	0	0	0	0	0	15	0	0	0	3	0	0
S1196_1316	Basidiomycota	Agaricomycetes	CCCCGTGTTGAGTCAAATTAAGCCGCAGGCTCCACTCCTGGTGGTGCCCTTCCGTCAATTCCTTTAAGTTTCAGCCTTGCGACCATACTCCCCCCAGAACCCAAAGACTTTGATTTCTCGTAAGGCGCCGAGCAACGCATCATAAGAAGGTTGCCCGATGCCTAGTCGGCATAGTTTACTGTTAAGACTACAACGGTATCTGATCGTTTTCGATCCCCTAACCTTCGTTCTTGATTAATGAAAACATCCTTGGCAAATGCTTTCGCAGTAGTTCATCTTCAGCCAATCCAAGAATTTCACCTCTAGCGGCTGAATATGAATGCCCCCAACTATCCCTATTAATCATTACGGCAGCTCTAAAAACCAACAAAATAGAACCACACGTCCTATTTCATTATT…	DQ444862	376	5.37536e-158	0.96	1	402	2	0	0	2	13	1	0	0	0	18	3	0	67	14	2	0	0	0	0	0	0	0	1	0	0	0	2	2
S1196_1317	Ascomycota	Sordariomycetes	CCCCGTGTTGAGTCAAATTAAGCCGCAGGCTCCCGTTTATTTGAGCTTGCTAATCCGCGCTGTTTCCAGCGCGGGCGGACTATATCTTAAGCAGTGTGTGAGCGAGCGCTCGGGGGACGAATCCTCCAGCACACTACCCACCCCCATTTAGTCTCTGAACCTTCCCCGTGACGAGGCTTGGCTGCGGATTGTCCATATATCCAGTGCGCTTTT	AF398398	208	6.6122e-84	0.99	1	213	0	0	0	0	0	0	0	0	0	0	0	0	0	0	0	0	0	0	0	0	0	0	2	0	0	0	0	0
S1196_1318	Ascomycota	Leotiomycetes	TCCCGTGTTGAGTCAAATTAAGCCGCAGGCTCCACTCCTGGTGGTGCCCTTCCGTCAATTCCTTTAAGTTTCAGCCTTGCGACCATACTCCCCCCAGAACCCAAAGACTTTGATTTCTCGTAAGGTGCCGAGCGAGTCAAAAGGAGAACATCGCCCGATCCCTAGTCGGCATGGTTTATGGTTAAGACTACGACGGTATCTGATCGTCTTCGGTCCCCTAACTTTCGTTCACTGATTAATGAAAACATCCTTGGCAAATGCTTTCGCAGTAGTTAGTCTTCAATAAATCCAAGAATTTCACCTCTGACAATTGAATACTGATGCCCCCGACTATCCCTATTAATCATTACGGCGGTCCTAGAAACCAACAAAATAGAACCACACG	DQ002903	374	3.93319e-157	0.98	2	385	0	0	0	3	0	0	0	0	0	1	5	0	2	3	0	2	0	0	8	0	0	2	0	0	0	2	0	0
S1196_1319	Basidiomycota	Agaricomycetes	CCCTGTGTTGAGTCAAATTAAGCTGCAGGCTCCACTCCTGGTGGTGCCCTTCTGTCAATTCCTTTAAGTTTCAGCCTTGCGACCATACTCCCCCCAGAACCCAAAGACTTTGATTTCTCGTAAGGTGCCGAGCAACACATAAGATTGAGTTCACCCAATCCCTAGTTGGCATAGTTTACTGTTAAGACTACAATGGTATCTGATCATTTTCGATCCCCTAACCTTCATTCTTGATTAATGAAAACATCCTTGGCAAATGCTTTCGCAGTAGTTAGTCTTCAGTAAATCCAAGAATTTCACCTCTAGCAACTGAATACTAATGCCCCCAACTATCCCTATTAATCATTACGGTGACTCTAGAAACCAACAAAATAGAACCGATGTCCTATTCTATTATTC…	U59082	377	1.96048e-158	0.96	1	406	0	8	0	0	0	0	0	0	0	0	0	0	0	0	0	0	0	0	0	0	0	0	0	0	0	0	0	0
S1196_1322	Basidiomycota	Fungi_other	CCCCGTGTTGAGTCAAATTAAGCTGCAGGCTCCACACCTGGTGGTGCCCTTCTGTCAATTCCTTTAAGTTTCAGCCTTGTGACCATACTCCCTCCAGAACCCATAAGGTGCCAAGCAACACATCATAAAGAGGTCACCTGATCCCTAGTCGGCATAGTTTACTGTTAAGACTACAACAGTATCTGATCGTTTTTGATCCCCTAACCTTTGTTCTTGATTAATGAAAACATCCTTGGCAAATGCTTTCACAGTAGTTCATCTTCAGTCAATCCAAGAATTTCACCTCTAGCAACATGAATGCCCCCAACTATTCCTATTAATCATTACGGCAGCTCTAAAAACCAACAAAATAGAACTACGCA	DQ444862	285	9.74799e-118	0.9	1	359	0	0	0	0	0	0	0	0	0	6	0	0	0	0	0	0	0	0	0	0	0	0	0	0	0	0	0	0
S1196_1327	Basidiomycota	Atractiellomycetes	CCCCGTGTTGAGTCAAATTAAGCCGCAGGCTCCACATCTGGTGGTGCCCTTCCGTCAATTCCTTTAAGTTTCAGCCTTGCGACCATACTCCCCCCCGAACCTAGACTCAAAGATTTCTCCTCAGGTGCCGGACAGGTCATTAGTTATGCCTGCCCGATCCCTAGTCGGCATAGTTTACTGTTAAGACTACAACGGTATCTGATCGTTTTCGATCCCCTAACCTTCGTTCTTGATCAATGAAAACATCCTTGGCAGATGCTTTCGCAGTAGTTCGTCTTCAATCAATCCAAGAGTTTCACCTCTAGCGATTGAATACGAATGCCCCCAACTATCCCTATTAATCATTACGGCGATCCTAGAAACCAACAAAATAGAGACGCGCGTCCTATTCTATTATTC…	U78043	363	3.09308e-152	0.95	1	403	0	0	0	0	0	0	0	0	0	0	0	0	0	0	0	2	2	0	19	0	0	0	0	0	0	0	0	0
S1196_1328	Ascomycota	Taphrinomycetes	CCCCGTGTTGAGTCAAATTAAGCCGCAGGCTCCACTCCTGGTGGTGCCCTTCCGTCAATTTCTTTAAGTTTCAGCCTTGCGACCATACTCCCCCCGGAACCCAAAAACTTTGATTTCCCATAAGGTGCCGGGCGAGTCAAGAAAAGAACATCGCCCGATCCCTAGTCGGCATAGTTTATGGTTAAGACTACGACGGTATCTGATCGTCTTCGATCCCCTAACTTTCGTTCTTGACTAATGAAAACATCCTTGACAAATGCTTTCGCAGTAGTTAGTCTTGAGTAAATCCAAGAATTTCACCTCTGACAACTCAATACTAATGTCCCCAACTGTCCCTATTAATCATTACGGCGGTCCTAGAAACCAACAAAATAGAACCACACG	AY548293	382	1.12097e-160	0.99	1	384	0	6	13	4	3	0	0	0	0	0	3	11	0	4	1	0	7	15	1	0	0	7	0	1	3	1	2	0
S1196_1329	Basidiomycota	Agaricomycetes	CCCTGTGTTGAGTCAAATTAAGCTGCAGGCTCCACTCCTGGTGGTGCCCTTCTGTCAATTCCTTTAAGTTTCAGCCTTGTGACCATACTCCCCCCAGAACCCAAAGACTTTGATTTCTCATAAGGTGCCGAACGACGCATAATATTGAGGTTGTCTGATCCCTAGTCGGCATAGTTTACTGTTAAGACTACAAGTATCTGATCATTTTTGATCCCCTAACCTTCATTCTTGATTAATGAAAACATCCTTGGCAAATGCTTTTGCAATAGTTTGTCTTGCATAAATCCAAGAATTTCACCTCTAGCAATGCAATACAAATGCCCCCAACTATCCCTATTAATCATTATGGCAACTCTAGAAACCAACAAAATAGAACCACACA	U59093	340	4.48897e-142	0.95	1	377	0	0	0	0	0	0	0	0	0	0	0	0	0	0	0	0	0	0	0	0	0	0	0	7	0	0	0	0
S1196_1330	Ascomycota	Fungi_other	CCCCGTGTTGAGTCAAATTAAGCCGCAGGCTCCACTCCTGGTGGTGCCCTTCCGTCAATTCCTTTAAGTTTCAGCCTTGCGACCATACTCCCCCCAGAACCCAAAGACTTTGATTTCGTGTAAGGTGCCGAACGAGTCAACAAGAAACATCGTCCGATCCCTAGTTCGCATAGTTTATGGTTAAGACTACGACGGTATCTGATCGTCTTCGATCCCCTAACTTTCGTTCCTGATTAATGAAAACATCCTTGGCGAATGCTTTCGCAGTAGTTGGTCTTCAATAAATCCAAGAATTTCACCTCTGACAATTGAATACCGACGCCCCCGACTGTCCTTATTAATCATTACGGAGGTCCTAGAAACCAACAAAATAGAACCGCAACG	AY987459	353	7.87094e-148	0.96	1	381	1	0	1	1	0	0	0	0	0	0	1	1	0	2	0	1	0	0	0	1	4	2	0	0	0	4	0	2
S1196_1332	Ascomycota	Sordariomycetes	CCCCGTGTTGAGTCAAATTAAGCCGCAGGTTCCACCCCTGGTGGTGCCCTTCCGTCAATTTCTTTAAGTTTCAGCCTTGCGACCATACTCCCCCTGGAGCCCAAGCACTTTGATTTCTCGAAAGGTGCCGAACGAGTCATAAATCAACATCGTCCGATCCCTAGTCGGCATAGTTTATAGTTAAGACTACGACGGTATCTGATCGTCTTCGATCCCCTAACTTTCGTTCCTTATCAATGAAAACATCCTTGGCGAATGCTTTCGCAGTAGTTAGTCTTCAATAGATCCAAGAATTTCACCTCTGACAATTGAATACTGACGCCCCCGACTGTCCCTATTAATCATTACGGCGGTCCTAGAAACCAACAAAATAGAACCACGCGTCCTATTCCATTATTC…	AF352081	399	3.49219e-168	0.99	1	403	1	1	1	12	337	97	25	0	0	1	5	43	351	8	8	1	2	0	0	6	13	54	9	43	3	6	6	1
S1196_1333	Basidiomycota	Agaricomycetes	CCCCATGTTGAGTCAAATTAAGCTGCAGGCTCCACTCCTGGTGGTGCCCTTCCGTCAATTCCTTTAAGTTTCAACCTTGCGACCATATTCCCCCCAGAACCCAAAGACTTTGATTTCTTGTAAGGTGCCGAGCGACACATAAAAGTGAGATCACCCGATCCCTAGTTGGCATAGTTTACTATAAAGACTACAACGGTATCTGATCATTTTCGATCCCCTAACCTTCGTTCTTGATTAATGAAAGCATCTTTGGCAAATGCTTTCGCAGAAGTTAGTCTTCAATAAATCCAAGAATTTCACCTCTAGCAACTGAATACTAATGCCCCCAACTATCCCTATTAATCATTATGGCGACTCTAGAAACCAACAAAATAGAACTGCACG	EU215396	354	2.83822e-148	0.96	1	384	0	0	0	0	0	0	0	0	0	0	0	8	0	0	0	0	0	0	0	0	0	0	0	0	0	0	0	0
S1196_1334	Chytridiomycota	Chytridiomycetes	CCCCGTGTTGAGTCAAATTAAGCCGCAGGCTCCACTCCTGGTGGTGCCCTTCCGTCAATTCCTTTAAGTTTCAGCCTTGCGACCATACTCCCCCCGGAACCCAAACACTTTGATTTCTCATAAGGTGCCGAACGAGTCAAAAGAATAACATCGTCCGATCCCTAGTCGGCATAGTTTATGGTTAAGACTACGACGGTATCTGATCGTCTTCGATCCCCTAACTTTCGTTCTTGATCAATGAAAACATCCTTGGCAAATGCTTTCGCAGAAGTTAGTCTTTCATAAATCCAAGAATTTCACCTCTGACAATTAAATACTAATGCCCCCAACTATCCCTATTAATCATTACTTCGGTCCTAGAAACCAACAAAATAGAACCAAAGTCCTATTTCATTATTC…	DQ643792	394	5.77692e-166	0.98	1	406	125	290	149	360	350	396	181	111	0	252	161	325	177	74	44	66	326	80	84	27	50	148	30	145	77	101	73	84
S1196_1335	Chytridiomycota	Chytridiomycetes	CCCCGTGTTGAGTCAAATTAAGCCGCAGGCTCCACTCCTGGTGGTGCCCTTCCGTCAATTCCTTTAAGTTTCAGCCTTGCGACCATACTCCCCCCGGAACCCAAAGACTTTGATTTCTCATAAGGTGCCAACAGAGTCATTAAAGTAACGTCTGCTGATCCCTAGTCGGCATAGTTTATGGTTAAGACTACGACGGTATCTGATCGTCTTCGATCCCCTAACTTTCGTTCTTGATTAATGAAAACATCCTTGGCAAATGCTTTCGCAGAAGTTAGTCTTTCATAAATCCAAGAATTTCACCTCTGACAATTAAATACTAATGCCCCCAACTATCCCTATTAATCATTACTTCAGTCCTAGAAACCAACAAAATAGAACCAAAGTCCTATTTTATTATTC…	JN020240	382	1.19526e-160	0.97	1	406	0	3	0	1	0	0	0	0	0	0	8	0	0	1	0	1	9	0	6	2	4	4	0	10	5	6	0	0
S1196_1336	Ascomycota	Orbiliomycetes	CCCCGTGTTGAGTCAAATTAGCTTACCTGGTGGTGCCCTTCCGTCAATTCCTTTAAGTTTCAGCCTTGCGACCATACTCCCCCCAGAACCCAAAGACTTTGATTTCTCGTAAGGTGCCGAGCGGGTCATAAATTAAACACCGCCCGATCCCTAGTCGGCATAGTTTATGGTTAAGACTACGACGGTATCTGATCGTCTTCGATCCCCTAACTTTCGTTCACTGATTAATGAAAACATCCTTGGCAAATGCTTTCGCAGTAGTTAGTCTTCAATAAATCCAAGAATTTCACCTCTGACAATTGAATACTGATGCCCCCGACTATCCCTATTAATCATTACGGTGGCTCTAGAAACCAACAAAATA	AY970524	337	9.05167e-141	0.99	26	364	0	0	0	0	1	0	0	0	0	0	0	0	0	0	0	0	0	0	0	0	0	6	0	0	0	0	0	0
S1196_1338	Entomophthoromycota	Entomophthoromycetes	TCCCGTGTTGAGTCAAATTAAGCCGCAGGCTCCACTCCTGGTGGTGCCCTTCCGTCAATTCCTTTAAGTTTCAGCCTTGCGACCATACTCCCCCCGGAACCCAAAAACTTTGATTTCTCGGATGGTGCCGAGCAAGTCAGTAAACAACATTGCCCGATCCCAAGTCGGCATCGTTTATGGTTAAGACTACGACGGTATCTAATCGTCTTCGATCCCCTAACTTTCGTTCTTGATTAATGAAAACATCCTTGGCAAATGCTTTCGCAATAGTTTGTCTTTCGAAAATCCAAGAATTTCACCTCTGACATCGAAATACAAATGCCCCCAACTATCCCTATTAATCATTACCGTGGTCCTAGAAACCAACAAAATAAGACCAAAG	AF368504	341	1.6187e-142	0.94	2	382	0	0	0	0	0	0	0	0	0	0	2	0	2	0	5	0	0	0	0	0	0	0	2	0	4	0	0	0
S1196_1339	Chytridiomycota	Chytridiomycetes	CCCCGTGTTGAGTCAAATTAAGCCGCAGGCTCCACTCCTGGTGGTGCCCTTCCGTCAATTCCTTTAAGTTTCAGCCTTGCGACCATACTCCCCCCTGAACCCAAAAACTTTGATTTCTCATACGGTGCCGATAGGTACAAAATGTAGCCTACCGATCCCGAGTCGGCATAGTTTACGGTTAAGACTACGTCGGTCTCTAATCGACTTCGATCCCTTAACTTTCGTTCTTGATTAATGAAAACATCCTTGACAAATGCTTTCGCAGTAGTTAGTCTTTAATAAATCCAAGAATTTCACCTCTGACAATTAAATACTAATGTCCCCAACTGTCCCTATTAATCATTACTTCAGTTCTAGAAACCAACAAAATAAAACCAAAGTCCTATTTCATTATTCCAT…	EU154974	354	2.9921e-148	0.94	1	402	0	0	0	0	0	0	0	0	0	0	0	0	0	0	7	0	0	0	0	0	0	0	0	0	0	0	0	0
S1196_1341	Chytridiomycota	Chytridiomycetes	TCCCGTGTTGAGTCAAATTAAGCCGCAGGCTCCACTCCTGGTTGTGCCCTTCCGTCAATTCCTTTAAGTTTCAGCCTTGCGACCATACTCCCCCCGGAACCCAAAAACTTTGATTTCTCATAAGGTGCTGATGAAGTCAAAAAAATATTCTCCACCAATCCCTAGTCGGCATAGTTTATGGTTAAGACTACGACGGTATCTGATCGTCTTCGATCCCCTAACTTTCGTTCTTGATTAATGAAAACATCCTTGGCAAATGCTTTCGCAGAAGTTAGTCTTTCATAAATCCAAGAATTTCACCTCTGACAATTAAATACTAATGCCCCCAACTATCCCTATTAATCATTACTTCGGTCCTAGAAACCAACAAAATAGAACCAAAG	DQ643792	358	4.78426e-150	0.96	2	383	0	0	0	0	2	0	0	0	0	0	0	0	0	0	0	0	0	0	0	0	0	0	0	0	0	0	0	0
S1196_1343	Glomeromycota	Fungi_other	TCCCGTGTTGAGTCAAATTAAGCCGCAGGCTCCACTCCTGGTGGTGCCCTTCCGTCAATTCCTTTAAGTTTCAGCCTTGCGACCATACTCCCCCCAGAACCCAAAGACTTATGATTTCTCGTAGAAAGGTGCCAATAAAGTCATTTATTTAAAAATTATTTCCTTTACTGATCCCTAGTCGGCATAGTTTATGGTTAAGACTACGACGGTATCTGATCGTCTTCGATCCCCTAACTTTCGTTCTTGATTAATGAAAACATCCTTGGCAAATGCTTTCGCAGAAGTTAGTCTTTCATAAATCTAAGAATTTCACCTCTGACAATTAAATACTAATGCCCCCAACTATCCCTATTAATCATTACTTCGGTCCTAAATAAGCAAAGTTTAACCCCTGCCTAT…	AF229770	307	2.24548e-127	0.9	2	401	0	0	0	0	0	0	0	0	0	0	0	0	0	0	0	0	5	0	0	0	0	0	0	0	0	0	0	0
S1196_1344	Basidiomycota	Agaricomycetes	CCCGGTGTTGAGTCAAATTAAGCTGCAGGCTCCACTCCTGGTGGTGCCCTTCTGTTAATTCCTTTAAGTTTCAGCCTTGCGACCATACTCCCCCCAGAACCCAAAGACTTTGATTTCTCGTAAGGTGCCGAGCAACACATAAATTTGAGTTCGCCCGATCCCTAGTCGGCATAGTTTACTGTTAAGACTACAACAGTATCTGATCGTTTTCGATCCCCTAACCTTCGTTCTTGATTGATGAAAACATCCTTGGCAAATGCTTTCGCAGTAGTTAGTCTTCAGTAAATCCAAGAATTTCACCTCTAGCAACTGAATACTAATGCCCCCAACTATCCCTATTAATCATTAGAGCGACTCTAGAAACCAACAAAATAGAACCGCATG	EF053586	364	1.05498e-152	0.97	1	382	0	0	1	0	0	0	0	0	0	0	0	0	0	0	0	0	0	0	0	0	7	0	0	0	0	2	0	0
S1196_1349	Ascomycota	Fungi_other	CCCGCATTTTGAATGTGTTGCCCGGTTATAAAAACCAGACTAGCATTTAACTGTTTAGAGGACATCCACATCACCCTTTCAGGCTGCTTTTTGGCGCAGAGTTGCTACGGCTATAACAAAAGTTTACGCCTTGTGGTGCCCTTCCGTCAATTTCTTTAAGTTTCAGCCTTGCGACCATACTCCCCCCAGAACCCAAAAACTTTGATTTCTCGTAAGGTGCCGAACGGGTCATCATAAAAACACCGTCCGATCCCTAGTCGGCATAGTTTATGGTTAAGACTACGACGGTATCTGATCGTCTTCGATCCCCTAACTTTCGTTCCCTGATTAATGAAAACATCCTTGGCGAATGCTTTCGCAGTAGTTAGTCTTCAGCAAATCCAAGAATTTCACCTCTGA…	AY526485	399	4.21306e-168	0.93	1	477	0	0	0	1	3	14	0	0	0	0	0	0	6	0	0	0	0	0	0	0	0	1	0	0	0	0	0	0
S1196_1350	Chytridiomycota	Fungi_other	TCCCGTGTTGAGTCAAATTAAGCCGCAGGCTCCACTCCTGGTGGTGGCCTTCCGTCAATTCCTTTAAGTTTCAGCCTTGCGACCATACTCCCCCCGGAACCTAAAAACTTTGATTTCTCGCAGGGTGCCGAGCCAGTCATATAATCAACATGGCCCGATCCCCAGTCGGCATAGTTTATGGTTAAGACTACGACGGTATCTAATCGTCTTCGATCCCCTAACTTTCGTTCTTGATTAATGAAAACATCCTTGGCAGATGCTTTCGCATTAGTTTGTCCCGAGCCGATCCAAGGATTTCACCCCTAACGACCCGATACAAATGCCCCCAACTGT	AF372719	275	2.37719e-113	0.92	2	331	3	0	1	4	4	0	0	0	0	0	0	7	0	0	0	0	0	0	0	0	0	16	0	0	0	0	0	4
S1196_1352	Basidiomycota	Agaricomycetes	CCCCGTGTTGAGTCAAATTAAGCCGCAGGCTCCACACCTGGTGGTGCCCTTCCGTCAATTCCTTTAAGTTTCAGCCTTGCGACCATACTCCCCCCAGAACCCAAAGACTTTGATTTCTCGTAAGGTGCCGATCTACACATCACAAAGAGGTAGACCGAACCCTAGTCGGCATAGTTTACTGTTAAGACTACAACGGTATCTGATCGTTTTCGATCCCCTAACCTTCGTTCTTGATTAATGAAAACATCCTTGGCAAATGCTTTCGCAGTAGTTCATCTTCAGTCAATCCAAGAATTTCACCTCTAGCGACTGAATATGAATGCCCCCAACTATCCCTATTAATCATTACGGCAGCTCTAAAAACCAACAAAATAGAACTACACGTCCTATTTTATTATT…	DQ444862	393	1.60658e-165	0.98	1	407	2	52	0	0	0	0	0	0	0	2	0	0	0	27	4	0	1248	0	2	0	0	2	0	40	0	0	1	0
S1196_1354	Ascomycota	Dothideomycetes	TCCCGTGTTGAGTCAAATTAAGCCGCAGGCTCCACGCCTGGTGGTGCCCTTCCGTCAATTTCTTTAAGTTTCAGCCTTGCGACCATACTCCCCCCAGAACCCAAAAACTTTGATTTCTCGTAAGGTGCTGAGCGAGTCAAAATGGTAACATCGCCCAATCCCTAGTCGGCATAGTTTATGGTTAAGACTACGACGGTATCTGATCGTCTTCGATCCCCTAACTTTCGTTCACTGATTAATGAAAACATCTTTGGCAAATGCTTTCGCAGTAGTTTGTCTTCCACTAATCCAAGAATTTCACCTCTGACAGTGGAATACAGATGCCCCCAACTATCCCTATTAATCATTACGGCTTCCCTAGAAACCAACAAAATAGGAAAGCCG	EF053578	355	1.02345e-148	0.96	2	384	0	0	1	20	15	102	1	1	0	0	1	55	4	3	6	0	3	0	0	6	2	4	0	2	0	1	1	5
S1196_1355	Mucoromycota	Mucoromycetes	CCCCGTGTTGAGTCAAATTAAGCCGCAGGCTCCACTCCTGGTGGTGCCCTTCCGTCAATTCCTTTAAGTTTCAGCCTTGCGAGCCGTACTCCCCCCAGAACCCAAAAACTTTGCTTTCGCTAAGATCCCGAGCAAGCCTTAATAGCCAAGCCCGATCTCTAGTCGGCATCGTTTGTGGTTAAGACTACGACGGTATCTAATCGTCTTCGATCCCTCAACTTTAGCCCTTGATCAATGGAAATGTCCTGGGTCAAATGCTTTCGCAGTAGTTTGTCTTCCGGCAATCCAAGAATTTCACCTCTAGCGCCGAAATACAAATGCCCCCGACCACTCCTATTCATCATTACTTTGGGTCTCAAAACCAACGAAATAGACCCTGGGTCCTATTCCATTATTCCA…	JQ004932	398	9.71212e-168	0.99	1	404	0	0	0	0	0	9	0	0	0	0	0	0	0	0	0	0	0	0	0	0	0	0	0	0	0	0	0	0
S1196_1356	Basidiomycota	Wallemiomycetes	CCCCGTGTTGAGTCAAATTAAGCCGCAGGCTCCACTCCTGGTGGTGCCCTTCCGTCAATTCCTTTAAGTTTCAGCCTTGCGACCATACTCCCCCCAGAACCCAAAGACTTTGATTTCTCGTACCGTGCCGAGCCAGTCAAAAGTATAACGTGGCCCGATCCGGAGTCGGCATAGTTTACTGTTAAGACTACAACGGTATCTAATCGTTTTCGATCCCCTAACCTTCGTTCTTGATTAATGAAAACATCCTTGGCAAATGCTTTCGCAGTAGTTAGTCTTCAGTAAATCCAAGAATTTCACCTCTAGCAACTGAATACTAATGCCCCCAACTATCCCTATTAATCATTACGGCGATCCTAGAAACCAACAAAATAGAACCGCACG	JX242892	382	1.12097e-160	0.99	1	384	787	17	685	1721	0	2974	336	3180	108	9687	403	8	1	1	172	47	0	2	0	35	90	0	42	239	388	873	0	464
S1196_1358	Chytridiomycota	Chytridiomycetes	CCCCGTGTTGAGTCAAATTAAGCCGCAGGCTCCACTCCTGGTGGTGCCCTTCCGTCAATTCCTTTAAGTTTCAGCCTTGCGACCATACTCCCCCCAGAACCCAAAAACTTTGATTTCTCATAAGGTGCCGATGAGGTCAATAAATAACGCCCACCGATCCCTAGTCGGCATAGTTTATGGTTAAGACTACGACGGTATCTGATCGTCTTCGATCCCCTAACTTTCGTTCTTGATTAATGAAAACATCCTTGGCAAATGCTTTCGCAGAAGTTAGTCTTTCATAAATCCAAGAATTTCACCTCTGACAATTAAATACTAATGCCCCCAACTGTCCCTATTAATCATTACTTCGGTCTTAGAAACCAACAAAATAAGACCAAAG	HQ901772	360	6.20211e-151	0.97	2	382	3	3	0	5	2	0	0	0	0	3	4	0	7	6	0	0	3	0	0	0	1	3	3	2	2	1	1	5
S1196_1359	Monoblepharidomycota	Monoblepharidomycetes	CCCCGTGTTGAGTCAAATTAAGCCGCAGGCTCCACTCCTGGTGGTGCCCTTCCGTCAATTCCTTTAAGTTTCAGCCTTGCGACCATACTCCCCCCAGAACCCAAAAGCTTTGATTTCTCACACCGTGCCAATCAGGTCACAATAAAGAACACTGACTGATCCGGAGCTGGCATAGTTTATAGTTAAGACTACGACGGTATCTGATCGTCTTCGATCCCCTAACTTTCGTTCTTGATCAATGAAAACATCCTTGGCAAATGCTTTCGCAGAAGTTCGTCTTTCATAAATCCAAGAATTTCACCTCTGACAATTAAATACGAATGCCCCCAACTATCCCTATTAATCATTACTCTAGTCCTAAAAACCAACAAAATAGAACCAAAG	AY546682	338	3.47322e-141	0.94	1	381	0	0	0	0	0	0	0	0	0	0	0	6	0	0	0	0	0	0	0	0	0	0	0	0	0	0	0	0
S1196_1361	Basidiomycota	Agaricomycetes	CCCCCGTGTTGAGTCAAATTAAGCCGCAGGCTCCACACCTGGTGGTGCCCTTCCGTCAATTCCTTTAAGTTTCAGCCTTGCGACCATACTCCCCCCAGAACCCAAAGACTTTGATTTCTCGTAAGGTGCCGAGCAACACATCATAATTGAGGTTGCCCGATCCCTAGTCGGCATAGTTTACTGTTAAGACTACAACGGTATCTGATCGTTTTCGATCCCCTAACCTTCGTTCTTGATTAATGAAAACATCCTTGGCAAATGCTTTCGCAGTAGTTAGTCTTCAGTAAATCCAAGAATTTCGCCTCTAGCAACTGAATACTAATGCCCCCAACTATCCCTATTAATCATTACGGCGACTCTAGAAACCAACAAAATAGAACCGCACG	FJ171727	373	1.09403e-156	0.98	2	386	20	13	3	5	8	64	52	3	0	7	4	11	23	298	41	8	41	5	29	6	35	16	6	31	1	17	2	1
S1196_1364	Chytridiomycota	Chytridiomycetes	CCCCGTGTTGAGTCAAATTAAGCCGCAGGCTCCACTCCTGGTGGTGCCCTTCCGTCAATTCCTTTAAGTTTCAGCCTTGCGACCATACTCCCCCCGGAACCCAAAAACTTTGATTTCTCATAAGGTGCCAAACAAGTCAATAAAATAACATTGTCTGATCCCTAGTCGGCATAGTTTATGGTTAAGACTACGACGGTATCTGATCGTCTTCGATACCCTAACTTTCGTTCTTGATTAATGAAAACATCCTTGGCAAATGCTTTCGCAGAAGTTCATCTTTCATAAATCCAAGAATTTCACCTCTGACAATTAAATATGAATGCCCCCAACTGTCCCTATTAATCATTACTTCGGTCCTAGAAACCAACAAAATAGAACCAAAGTCCTATTCTATTATTC…	JN020240	386	2.02087e-162	0.97	1	406	44	187	5	17	246	1	0	8	1	31	86	287	7	16	1	14	18	38	12	3	13	2	5	39	3	11	39	1
S1196_1366	Ascomycota	Sordariomycetes	CCCCGTGTTGAGTCAAATTAAGCCGCAGGCTCCACCCCTGGTGGTGCCCTTCCGTCAATTTCTTTAAGTTTCAGCCTTGCGACCATACTCCCCCCAGAACCCACAAGCTTTGATTTCTCGTAAGGTGCCGAACGAGTCAAATAATGTAACATCGTCCGATCCCTAGCCGGCATAGTTTATGGTTGAGACTACGACGGTATCTGATCGTCTTCGATCCCCCAACTTTCGTTCTTGATTAAAGAAAACATCCTTGGCAAATGCTTTCGCAGTAGTTAGTCTTCAATAGATCCAAGAATTTCACCTCTGACTATTGAATACTAATGCCCCCGACTGTCCCTATTGATCATCACGACGGTCCTAGAAACCAACAAAATAGAACCGCACG	AF515370	348	1.29489e-145	0.95	1	385	0	0	0	1	0	0	0	0	0	0	0	0	0	0	0	0	0	0	0	0	0	0	0	0	0	1	4	0
S1196_1371	Chytridiomycota	Chytridiomycetes	CCCCGTGTTGAGTCAAATTAAGCCGCAGGCTCCACTCCTGGTGGTGCCCTTCCGTCAATTCCTTTAAGTTTCAGCCTTGCGACCATACTCCCCCCAGAACCCAAAAACTTTGATTTCTCTCAAGGTGCTGAACGCGTCTAGTATAAAAAACATCGTCCAATCCCTAGTCGGCATAGTTTATGGTTAAGACTACGACGGTATCTAATCGTCTTCGATCCCCTAACTTTCGTTCTTGATTAATGAAAACATCCTTGGCAAATGCTTTCGCAGAAGTTAGTCTTTCATAGATCCAAGAATTTCACCTCTGACAATTAAATACTAATGCCCCCAACTGTCCCTATTAATCATTACTTTGGTCCTAGAAACCAACAAAATAGAACCAAAG	JN020240	353	7.89464e-148	0.96	1	385	0	2	0	0	0	0	0	0	0	0	0	0	0	1	1	0	0	0	0	0	0	2	0	5	0	0	0	0
S1196_1373	Basidiomycota	Fungi_other	CCCCATGTTGAGTCAAATTAAGCTGCAGGCTCCATGCCTGGTGGTGCCCTTCTGTCAATTCCTTTAAGTTTCAGCCTTGTGACCATACTCCCCCCAGAACCCAAAGACTTTGATTTCTTGTAAGGTGCTGAGTGACACATGAAAGTGAGATCACTCAATCCCTAGTCAGCATAGTTTACTGTTAAGACTACAATGGTATCTGATCATTTTTGATCCCCTAACCTTCATTCTTGATTAATGAAAACATCCTTGGCAAATGCTTTTGCAGAAGTTAGTCTTCTGTAAATCCAAGAATTTCACCTCTAGCCACAGAATACTAATGCCCCCAACTATCCCTATTAATCATTATGGCAACTCTAGAAACCAACAAAATAGAACTGCATGTCCTATTTCATTATT…	AF518593	353	8.41621e-148	0.93	1	407	0	0	0	7	0	0	0	0	0	0	0	0	0	0	0	0	0	0	0	0	0	0	0	0	0	0	0	1
[truncated: 3,202 more rows]
